# Supplementary material for: SARS-CoV-2 Nsp14 mediates the effects of viral infection on the host cell transcriptome
Source: eLife. 2022 Mar 16;11:e71945. doi: 10.7554/eLife.71945 (PMC9054133; doi:10.7554/eLife.71945)
Supplement: Supplementary file 2. — 3' RNA-seq. Supplementary file 2b: Gene Ontology (GO) described in Figure 5. 3' RNA-seq. Supplementary file 2c: AME analysis with 100 bp of promoter described in Figure 5. Supplementary file 2d: FIMO analysis with 100 bp promoter described in Figure 5. Supplementary file 2e: AME analysis with 1000 bp promoter described in Figure 5. [file elife-71945-supp2.xlsx]

## Sheet: Supplementary File 2a
Supplementary File 2a: DEG at different time points described in Figure 5. 3' RNA seq
genes	Nsp14vsCtrl_6hr_Mean	Nsp14vsCtrl_6hr_log2FoldChange	Nsp14vsCtrl_6hr_pvalue	Nsp14vsCtrl_6hr_padj	Nsp14vsCtrl_8hr_Mean	Nsp14vsCtrl_8hr_log2FoldChange	Nsp14vsCtrl_8hr_pvalue	Nsp14vsCtrl_8hr_padj	Nsp14vsCtrl_12hr_Mean	Nsp14vsCtrl_12hr_log2FoldChange	Nsp14vsCtrl_12hr_pvalue	Nsp14vsCtrl_12hr_padj	Nsp14vsCtrl_24hr_Mean	Nsp14vsCtrl_24hr_log2FoldChange	Nsp14vsCtrl_24hr_pvalue	Nsp14vsCtrl_24hr_padj	Nsp14vsCtrl_48hr_Mean	Nsp14vsCtrl_48hr_log2FoldChange	Nsp14vsCtrl_48hr_pvalue
CCDC86	6432.57	0.0733019	0.302079	1	6432.57	0.107505	0.129301	0.811138	6432.57	0.505689	1.67e-12	2.47e-08	6432.57	0.762998	5.75e-27	2.09e-23	6432.57	1.13764	2.91e-55
SNHG15	8077.62	0.429852	0.00120579	0.81048	8077.62	0.853957	1.16e-10	3.91e-07	8077.62	0.899974	1.22e-11	4.74e-08	8077.62	1.74644	9.35e-40	1.36e-35	8077.62	2.02956	1.11e-52
SNHG17	346	0.235915	0.164398	1	346	0.659632	8.36e-05	0.0434227	346	1.01371	3.68e-09	6.36e-06	346	1.82934	1.26e-28	9.12e-25	346	2.42609	3.04e-42
RPS3A	161.8	-0.155289	0.510311	1	161.8	-0.0736865	0.734258	0.99209	161.8	-0.0068812	0.977737	0.994003	161.8	1.78704	1.25e-18	1.65e-15	161.8	2.71429	1.86e-40
WTAP	1070.96	0.133061	0.115075	1	1070.96	0.148679	0.0747211	0.734099	1070.96	0.0930181	0.287267	0.670017	1070.96	0.707314	5.37e-17	5.58e-14	1070.96	1.08965	7.35e-35
SAT1	1069.02	0.129117	0.442505	1	1069.02	0.119783	0.468826	0.961004	1069.02	-0.553574	0.00123243	0.0584016	1069.02	-0.731389	6.92e-06	0.000211045	1069.02	-1.95326	1.84e-34
ADAMTS1	464.211	-0.0151872	0.920552	1	464.211	0.022985	0.87759	0.993238	464.211	-0.0703628	0.649082	0.886933	464.211	-0.476334	0.00123446	0.0121491	464.211	-1.81657	6.42e-32
ASPH	2250.19	0.108822	0.264848	1	2250.19	-0.0645754	0.505095	0.968194	2250.19	-0.415784	2.65e-05	0.00643503	2250.19	-0.68291	2.38e-12	6.78e-10	2250.19	-1.13602	3.68e-30
HNRNPD	9030.41	-0.0102512	0.866789	1	9030.41	-0.0644872	0.289859	0.914313	9030.41	-0.127023	0.0393089	0.294448	9030.41	0.308531	4.54e-07	2.16e-05	9030.41	0.711251	6.54e-30
SPINT2	6033.57	0.104288	0.157501	1	6033.57	-0.0763815	0.297559	0.923295	6033.57	-0.110354	0.137277	0.498529	6033.57	-0.355267	1.25e-06	5.03e-05	6033.57	-0.825069	4.74e-29
KDELR2	1280.37	0.0265224	0.764333	1	1280.37	-0.157301	0.0715449	0.728938	1280.37	-0.130241	0.155249	0.523095	1280.37	-0.0371292	0.672389	0.834155	1280.37	-0.953006	1.42e-27
INSIG1	805.945	-0.225934	0.153434	1	805.945	-0.149986	0.337922	0.937005	805.945	-0.390731	0.0146255	0.189753	805.945	-1.07657	1.17e-11	2.93e-09	805.945	-1.69105	5.19e-26
BEX1	1063.48	0.0551681	0.547265	1	1063.48	0.0675771	0.457356	0.961004	1063.48	0.126335	0.182274	0.564248	1063.48	0.454677	1.02e-06	4.23e-05	1063.48	1.0641	6.72e-26
SEC24D	250.485	0.0871413	0.598679	1	250.485	-0.115238	0.46753	0.961004	250.485	-0.153303	0.375329	0.73543	250.485	-0.623655	7.16e-05	0.00129915	250.485	-1.61498	8.76e-26
LOC100507634	91.1853	-0.0832976	0.776426	1	91.1853	0.352866	0.215564	0.875606	91.1853	-0.445697	0.162332	0.532417	91.1853	1.21435	2.3e-05	0.000542829	91.1853	3.45497	8.89e-26
HOXA9	764.585	-0.0809657	0.503613	1	764.585	-0.221051	0.0639696	0.712072	764.585	-0.218565	0.0802521	0.401439	764.585	0.772211	5.8e-11	1.14e-08	764.585	1.2587	9.96e-26
COPA	1849.58	-0.349412	1.08e-06	0.00545497	1849.58	-0.0735917	0.30041	0.924963	1849.58	-0.0345697	0.639611	0.883801	1849.58	-0.101645	0.156308	0.362945	1849.58	-0.768549	1.07e-25
HOXA10-HOXA9	764.116	-0.0797665	0.511128	1	764.116	-0.218569	0.0677899	0.721244	764.116	-0.220682	0.0781533	0.39643	764.116	0.770711	7.16e-11	1.37e-08	764.116	1.25848	1.38e-25
TSC22D3	818.568	0.0893363	0.370876	1	818.568	0.232168	0.0159444	0.508168	818.568	-0.319125	0.00151143	0.0647248	818.568	-0.506385	1.23e-07	7.31e-06	818.568	-1.04795	4.09e-25
SNHG11	389.653	0.295562	0.0668577	1	389.653	0.433577	0.00692842	0.428874	389.653	0.727801	9.2e-06	0.00304294	389.653	1.1326	6.44e-13	2.13e-10	389.653	1.66623	1.2e-24
EPRS1	1648.05	-0.147726	0.0564036	1	1648.05	-0.301698	7.09e-05	0.0421353	1648.05	-0.176917	0.0271114	0.250733	1648.05	-0.190311	0.0135558	0.0699013	1648.05	-0.81114	4.92e-24
SSR1	1664.33	-0.107631	0.0655609	1	1664.33	0.0523494	0.360502	0.94012	1664.33	0.0126325	0.838347	0.956291	1664.33	0.0835803	0.146303	0.348578	1664.33	-0.571828	9.89e-23
C17orf58	1443	0.0812096	0.365513	1	1443	-0.245173	0.00535021	0.378436	1443	-0.0594554	0.513056	0.829196	1443	-0.529812	1.9e-09	2.32e-07	1443	-0.869703	2.46e-22
SNHG3	1347.96	-0.018414	0.836235	1	1347.96	0.167464	0.056555	0.69925	1347.96	0.255186	0.00457624	0.116604	1347.96	0.524564	1.31e-09	1.67e-07	1347.96	0.84929	4.47e-22
ZC3H4	1590.97	-0.0329321	0.731013	1	1590.97	0.0993886	0.294508	0.917196	1590.97	0.0563402	0.561399	0.853132	1590.97	0.570492	2.21e-09	2.52e-07	1590.97	0.92704	3.05e-21
KDELR3	718.961	0.31882	0.0513762	1	718.961	-0.0378739	0.813236	0.99209	718.961	0.10207	0.535242	0.839905	718.961	-0.633239	7.48e-05	0.00135045	718.961	-1.48778	4.27e-21
PLK1	3235.97	-0.0692858	0.46715	1	3235.97	-0.0663229	0.486978	0.964518	3235.97	0.0382781	0.691575	0.903095	3235.97	0.266037	0.00553805	0.0364668	3235.97	0.914056	4.34e-21
LCMT2	120.295	0.428594	0.0103552	1	120.295	0.496077	0.00154506	0.237108	120.295	0.393732	0.021424	0.231531	120.295	0.963127	3.47e-09	3.79e-07	120.295	1.85512	8.65e-21
PCDH10	177.925	0.198422	0.300795	1	177.925	-0.276622	0.134686	0.814612	177.925	-0.235868	0.232419	0.621772	177.925	0.749516	1.97e-05	0.000478213	177.925	1.68454	9.63e-21
MAGED1	1971.71	-0.0169361	0.849303	1	1971.71	-0.117686	0.18393	0.85813	1971.71	-0.174465	0.0541607	0.339307	1971.71	-0.284005	0.001478	0.0138067	1971.71	-0.845492	1.09e-20
IDH2	524.703	-0.123434	0.213539	1	524.703	-0.160891	0.0962478	0.760283	524.703	-0.0200797	0.846422	0.958736	524.703	-0.660261	1.46e-11	3.47e-09	524.703	-0.961965	1.54e-20
RTN4	2278.08	0.0438408	0.445163	1	2278.08	-0.124503	0.0268683	0.574892	2278.08	-0.0910617	0.124732	0.481906	2278.08	-0.148518	0.00969862	0.0555091	2278.08	-0.558781	2.17e-20
SERP1	2171.83	0.0232736	0.693501	1	2171.83	-0.0839822	0.145701	0.825343	2171.83	-0.039062	0.525382	0.834755	2171.83	-0.0450481	0.432086	0.664309	2171.83	-0.527268	4.22e-20
MAGEF1	674.913	0.0173732	0.836909	1	674.913	-0.0873358	0.281185	0.908344	674.913	-0.0349436	0.694512	0.903997	674.913	0.38932	6.09e-07	2.78e-05	674.913	0.724972	5e-20
LOC730183	190.134	0.0862069	0.642877	1	190.134	0.0141734	0.937396	0.99546	190.134	0.0499515	0.797519	0.94179	190.134	0.964176	7.71e-08	4.87e-06	190.134	1.66713	7.59e-20
PAQR8	125.385	0.259966	0.204369	1	125.385	-0.220371	0.266991	0.899985	125.385	-1.06382	1.49e-06	0.00077409	125.385	-2.66175	7.12e-28	3.45e-24	125.385	-2.28152	1.56e-19
SNORD38B	62.6251	-0.161199	0.607917	1	62.6251	-0.00727286	0.979564	0.999254	62.6251	0.0348826	0.911642	0.97752	62.6251	1.95545	1.09e-13	4.27e-11	62.6251	2.39406	1.65e-19
BCL2L13	739.877	0.247107	0.0248988	1	739.877	-0.0194501	0.856687	0.993238	739.877	-0.102358	0.357788	0.724196	739.877	-0.691248	2.27e-10	3.75e-08	739.877	-1.02772	2.2e-19
MDM2	358.722	0.130703	0.262039	1	358.722	0.114669	0.312362	0.925405	358.722	0.294442	0.0149084	0.191505	358.722	0.754661	5.59e-11	1.11e-08	358.722	1.14315	2.97e-19
HOXA7	203.578	0.140226	0.403499	1	203.578	0.0620825	0.703944	0.991763	203.578	0.0739445	0.666957	0.893828	203.578	0.413625	0.0120193	0.0642595	203.578	1.63062	4.55e-19
NOL9	631.972	0.109447	0.274909	1	631.972	-0.0577549	0.554667	0.976023	631.972	0.0989288	0.339789	0.711196	631.972	0.461658	4.51e-06	0.00014687	631.972	0.998756	4.77e-19
ZNF746	2222.67	-0.0415853	0.658283	1	2222.67	-0.189052	0.0432301	0.654019	2222.67	0.120934	0.206021	0.590591	2222.67	0.544095	5.9e-09	5.83e-07	2222.67	0.845017	4.86e-19
HSPA5	1598.61	-0.0360916	0.676369	1	1598.61	-0.120901	0.158753	0.839106	1598.61	-0.0798523	0.372587	0.734273	1598.61	-0.164063	0.0588511	0.192755	1598.61	-0.783301	4.92e-19
FNDC10	1111.87	-0.00235966	0.985688	1	1111.87	-0.229448	0.079743	0.743147	1111.87	0.0970529	0.46537	0.798019	1111.87	0.168981	0.19872	0.42201	1111.87	1.21545	5.45e-19
COPB1	723.427	-0.0927185	0.392804	1	723.427	-0.0949273	0.37126	0.94012	723.427	-0.303836	0.00852948	0.152209	723.427	-0.113868	0.283743	0.522563	723.427	-0.951258	7.59e-19
EID1	1553.24	-0.072002	0.361537	1	1553.24	-0.0250929	0.745868	0.99209	1553.24	-0.0501392	0.534578	0.83972	1553.24	0.416053	5.83e-08	3.85e-06	1553.24	0.692079	9.75e-19
MKI67	2075.61	-0.166169	0.0211319	1	2075.61	-0.114756	0.109952	0.777773	2075.61	-0.307748	3.39e-05	0.00786758	2075.61	0.314876	1.56e-05	0.000399142	2075.61	0.649908	3.55e-18
ARF4	1072.48	0.207779	0.0673642	1	1072.48	0.00439121	0.968634	0.998141	1072.48	-0.160156	0.166953	0.53954	1072.48	-0.386179	0.000542213	0.00652542	1072.48	-0.962717	5.02e-18
MIEF1	891.594	-0.0652489	0.45255	1	891.594	-0.0324793	0.702925	0.991495	891.594	0.1718	0.0548431	0.339992	891.594	0.415708	1.53e-06	6e-05	891.594	0.806866	6.13e-18
MSMO1	971.522	-0.0957061	0.360408	1	971.522	-0.0178463	0.86224	0.993238	971.522	-0.583677	6.28e-08	7e-05	971.522	-0.591123	1.26e-08	1.07e-06	971.522	-0.889622	9.24e-18
RPS6KA2	1011.78	0.197204	0.215629	1	1011.78	-0.220521	0.162587	0.839905	1011.78	-0.457334	0.00449211	0.115597	1011.78	-1.25676	3.11e-15	2.15e-12	1011.78	-1.37444	1.4e-17
HNRNPM	2529.03	-0.0904626	0.235116	1	2529.03	0.126126	0.0961265	0.760283	2529.03	-0.0305047	0.693975	0.9039	2529.03	0.593513	1.45e-14	7.24e-12	2529.03	0.696173	1.82e-17
MGME1	524.925	0.0316126	0.796875	1	524.925	0.0340099	0.773504	0.99209	524.925	0.265233	0.0334127	0.275216	524.925	0.907094	3.48e-15	2.3e-12	524.925	0.991209	1.87e-17
COPB2	463.024	-0.205702	0.0538597	1	463.024	-0.0240391	0.815469	0.99209	463.024	0.0513412	0.645453	0.885456	463.024	-0.115548	0.268335	0.506213	463.024	-0.902709	3.46e-17
DHTKD1	832.376	0.116141	0.272878	1	832.376	0.000321175	0.997547	0.999327	832.376	-0.0667956	0.535674	0.840329	832.376	-0.921138	2.9e-17	3.24e-14	832.376	-0.987885	4.73e-17
AURKAP1	31.445	0.833966	0.151631	1	31.445	0.0905302	0.865807	0.993238	31.445	1.49069	0.00557126	0.125317	31.445	4.21983	3.07e-19	5.57e-16	31.445	4.58608	5.01e-17
SCD	2627.27	-0.0818911	0.276015	1	2627.27	-0.154842	0.0383325	0.637225	2627.27	-0.1751	0.0218828	0.233693	2627.27	-0.298086	7.36e-05	0.00133066	2627.27	-0.650966	6.56e-17
EIF2AK1	4356.84	0.032191	0.615724	1	4356.84	-0.165532	0.00937942	0.462138	4356.84	-0.161046	0.0135103	0.183136	4356.84	-0.346009	6.56e-08	4.25e-06	4356.84	-0.544506	6.61e-17
LINC01521	289.536	-0.150112	0.302793	1	289.536	0.164683	0.249097	0.893374	289.536	-0.149045	0.317588	0.693003	289.536	0.368502	0.010726	0.0593355	289.536	1.36374	8.66e-17
TBC1D23	2733.11	0.030702	0.810228	1	2733.11	0.262519	0.0389668	0.638406	2733.11	-0.000369285	0.997703	1	2733.11	-0.31003	0.0146105	0.0736916	2733.11	-1.05701	1.13e-16
HSP90B1	1857.89	-0.250104	0.00802165	1	1857.89	-0.144315	0.122719	0.80582	1857.89	-0.0555828	0.562731	0.85331	1857.89	-0.0874563	0.353276	0.592317	1857.89	-0.789543	1.13e-16
MTHFD2	1305.71	-0.187927	0.0167746	1	1305.71	-0.0966017	0.210559	0.872288	1305.71	-0.204284	0.0119345	0.175797	1305.71	-0.495723	2.07e-10	3.54e-08	1305.71	-0.664403	1.14e-16
NTMT1	360.158	-0.0503212	0.628883	1	360.158	0.0281264	0.781635	0.99209	360.158	0.154075	0.155159	0.522906	360.158	0.653389	2.27e-10	3.75e-08	360.158	0.938369	1.39e-16
PPP1R15A	808.292	0.995336	8.54e-10	1.12e-05	808.292	1.44343	2.3e-19	1.56e-15	808.292	1.12196	4.22e-12	2.47e-08	808.292	1.61089	1.29e-24	3.76e-21	808.292	1.28848	1.67e-16
MRPS10	1176.19	-0.119598	0.255585	1	1176.19	0.171692	0.0994311	0.760654	1176.19	0.237996	0.0252231	0.246009	1176.19	0.513076	8e-07	3.49e-05	1176.19	0.887722	2e-16
ARL1	509.092	0.0323499	0.750151	1	509.092	0.0287113	0.766936	0.99209	509.092	0.069721	0.509293	0.826902	509.092	-0.0459862	0.637236	0.8129	509.092	-0.808698	2.16e-16
DMKN	3728.83	0.0222395	0.823865	1	3728.83	0.249994	0.0119207	0.481339	3728.83	0.191608	0.0556909	0.341402	3728.83	0.449775	5.89e-06	0.000184308	3728.83	0.817686	2.49e-16
USO1	486.652	-0.217367	0.10846	1	486.652	-0.128667	0.329106	0.934913	486.652	-0.184545	0.187557	0.570936	486.652	-0.805746	1.97e-09	2.35e-07	486.652	-1.11842	3.03e-16
SRSF8	324.116	-0.0101271	0.943721	1	324.116	0.117401	0.400129	0.943195	324.116	-0.257161	0.0885167	0.417152	324.116	1.04074	1.68e-13	6.11e-11	324.116	1.22611	5.79e-16
C6orf120	371.519	-0.0205016	0.845069	1	371.519	-0.235614	0.0167055	0.517567	371.519	0.0993248	0.36839	0.730229	371.519	0.205528	0.0324595	0.128616	371.519	0.826137	6.19e-16
PYCR1	751.546	-0.0774736	0.327464	1	751.546	-0.165476	0.0343687	0.605394	751.546	0.174636	0.0394068	0.294613	751.546	-0.0251569	0.753409	0.883923	751.546	-0.675346	9.35e-16
TASOR2	546.83	-0.129605	0.250574	1	546.83	0.00859195	0.938321	0.99546	546.83	0.0698412	0.554968	0.850098	546.83	0.615731	3.59e-08	2.56e-06	546.83	0.913705	1.14e-15
BAG1	200.673	-0.00709905	0.960485	1	200.673	0.0642644	0.648093	0.986879	200.673	0.178544	0.243274	0.632509	200.673	0.55437	0.000145925	0.00227925	200.673	1.29853	1.45e-15
LOC107986196	25.7589	0.314321	0.668198	1	25.7589	0.574179	0.447028	0.956333	25.7589	1.14526	0.0757112	0.392225	25.7589	4.63208	9.92e-14	4e-11	25.7589	4.87814	1.54e-15
IDI1	899.134	0.0982414	0.443892	1	899.134	-0.124916	0.322098	0.930927	899.134	-0.213085	0.100469	0.440133	899.134	-0.691383	4.11e-08	2.9e-06	899.134	-1.00679	1.61e-15
LUC7L	377.795	0.107741	0.382941	1	377.795	0.263347	0.030777	0.590622	377.795	-0.0674949	0.60511	0.870635	377.795	0.719551	4.76e-09	4.77e-07	377.795	1.04971	1.74e-15
PDIA5	478.889	-0.0882769	0.433966	1	478.889	-0.0245805	0.822401	0.99211	478.889	-0.151884	0.195609	0.580814	478.889	-0.184216	0.092067	0.259483	478.889	-0.875826	1.78e-15
DAP	347.386	-0.0547182	0.736017	1	347.386	-0.0326532	0.837429	0.992693	347.386	-0.348054	0.0394296	0.294641	347.386	-0.568264	0.000466267	0.00584383	347.386	-1.34377	1.99e-15
PJA2	1124.98	-0.053637	0.579427	1	1124.98	0.0494023	0.600527	0.982562	1124.98	-0.225998	0.0220281	0.234439	1124.98	-0.231436	0.014096	0.0717444	1124.98	-0.751224	2.16e-15
FEM1A	334.713	0.13066	0.328189	1	334.713	0.153169	0.241673	0.88838	334.713	0.19517	0.16014	0.529492	334.713	0.834248	5.06e-10	7.21e-08	334.713	1.15632	2.16e-15
YTHDF2	1105.9	-0.0378016	0.727584	1	1105.9	0.265901	0.013398	0.489542	1105.9	0.427957	0.000102687	0.0152005	1105.9	0.476201	1.18e-05	0.000319121	1105.9	0.879175	2.24e-15
HOXB7	503.548	-0.0154044	0.894399	1	503.548	-0.0311236	0.783686	0.99209	503.548	0.191475	0.10081	0.440852	503.548	0.431622	0.000149906	0.00232749	503.548	0.921375	2.85e-15
HJURP	638.87	0.171719	0.179458	1	638.87	-0.119918	0.339708	0.938294	638.87	0.192698	0.138119	0.499647	638.87	0.685333	3.34e-08	2.4e-06	638.87	0.983685	3.04e-15
NOP56	1686.28	-0.0453543	0.489019	1	1686.28	0.0202329	0.752983	0.99209	1686.28	0.214481	0.00153389	0.0648063	1686.28	0.375985	1.26e-08	1.07e-06	1686.28	0.576708	3.24e-15
MTA1	534.635	-0.0133409	0.898634	1	534.635	-0.183661	0.0797294	0.743147	534.635	0.261701	0.0158544	0.195731	534.635	-0.7732	6.74e-13	2.17e-10	534.635	-0.928442	4.11e-15
PHB	5149.83	0.0299496	0.751201	1	5149.83	0.173447	0.0654923	0.714481	5149.83	0.165902	0.0802019	0.401439	5149.83	0.375916	6.6e-05	0.00121724	5149.83	0.74475	4.91e-15
SKA2	1303.61	-0.121254	0.181004	1	1303.61	0.047242	0.59235	0.982562	1303.61	0.129536	0.15798	0.526259	1303.61	0.470085	6.68e-08	4.31e-06	1303.61	0.687155	6.68e-15
LOC101930085	79.1139	-0.0416756	0.864166	1	79.1139	0.130188	0.588489	0.982206	79.1139	-0.0407493	0.870477	0.96766	79.1139	0.633931	0.00816785	0.0491705	79.1139	2.25613	7.81e-15
LMAN1	740.71	-0.00227899	0.986704	1	740.71	0.107775	0.421585	0.947136	740.71	-0.0636134	0.645637	0.885456	740.71	-0.122171	0.361356	0.59925	740.71	-1.0473	8.2e-15
POGZ	469.656	-0.316239	0.0113252	1	469.656	0.227579	0.0646601	0.713299	469.656	0.0788633	0.535908	0.840358	469.656	0.830421	2.32e-11	5.26e-09	469.656	0.988686	1.08e-14
PRSS16	240.415	-0.0109835	0.954495	1	240.415	0.163846	0.379501	0.941267	240.415	0.136717	0.487821	0.812735	240.415	-0.540162	0.00410244	0.0294427	240.415	-1.48097	1.11e-14
TCTA	425.057	0.0178557	0.90213	1	425.057	-0.152057	0.292015	0.915766	425.057	-0.119025	0.428941	0.774965	425.057	0.136394	0.357518	0.595628	425.057	1.22699	1.12e-14
TEX261	987.221	0.0253858	0.839483	1	987.221	-0.0424599	0.733656	0.99209	987.221	0.0214869	0.866748	0.965864	987.221	0.441681	0.000466254	0.00584383	987.221	1.01244	1.2e-14
GOLGA2	271.315	-0.0808372	0.599988	1	271.315	-0.00134726	0.992981	0.999254	271.315	-0.0248607	0.878055	0.969672	271.315	-0.704409	7.29e-06	0.00021981	271.315	-1.1936	1.37e-14
SRPRA	595.03	-0.0609201	0.623122	1	595.03	-0.0842179	0.490407	0.964518	595.03	0.198599	0.119749	0.47288	595.03	-0.566549	6.74e-06	0.000206992	595.03	-0.976513	1.54e-14
CLEC11A	195.721	0.0779306	0.608813	1	195.721	0.0967316	0.514919	0.968306	195.721	0.302218	0.0579537	0.348193	195.721	0.433177	0.00406781	0.0292664	195.721	1.18489	1.55e-14
GFPT1	237.055	-0.0884075	0.56755	1	237.055	-0.0428891	0.775976	0.99209	237.055	-0.226683	0.163696	0.534187	237.055	-0.2834	0.065612	0.207688	237.055	-1.20116	1.64e-14
NFKBIB	494.996	-0.0224966	0.849378	1	494.996	0.124911	0.28793	0.913805	494.996	0.304786	0.0122289	0.178306	494.996	0.935731	1.05e-15	9.55e-13	494.996	0.928364	2e-14
TOB2P1	121.849	-0.217456	0.479155	1	121.849	0.472093	0.116232	0.794281	121.849	-0.278102	0.37297	0.734311	121.849	1.25455	3.74e-05	0.000787588	121.849	2.38678	2e-14
TPM4	1456.7	-0.0227119	0.76886	1	1456.7	-0.066071	0.383851	0.941267	1456.7	-0.37393	3.2e-06	0.00134959	1456.7	-0.208893	0.00644384	0.0410901	1456.7	-0.597755	2.13e-14
EWSR1	630.092	0.0381613	0.702516	1	630.092	-0.00226909	0.981523	0.999254	630.092	0.0156538	0.880781	0.970569	630.092	0.412835	3.21e-05	0.000704778	630.092	0.83325	2.61e-14
ABI2	739.74	-0.0539762	0.593556	1	739.74	-0.0760255	0.444593	0.956047	739.74	-0.148476	0.151913	0.519068	739.74	-0.280945	0.00528235	0.0352626	739.74	-0.783435	4.16e-14
FARP1	393.887	0.0870541	0.515173	1	393.887	-0.488224	0.000243776	0.089011	393.887	-0.428119	0.00234829	0.0826638	393.887	-0.602099	1.09e-05	0.000300353	393.887	-1.13268	4.17e-14
SRSF10	914.135	-0.0107826	0.910963	1	914.135	0.11077	0.240828	0.88838	914.135	0.183898	0.0608947	0.355155	914.135	0.446102	2.61e-06	9.45e-05	914.135	0.750678	4.92e-14
RAD51C	2107.49	-0.000160059	0.998551	1	2107.49	0.158497	0.0687475	0.722955	2107.49	0.0372068	0.677344	0.89806	2107.49	0.55168	2.06e-10	3.54e-08	2107.49	0.662728	6.29e-14
XIST	23561.8	-0.0483908	0.662982	1	23561.8	-0.0790798	0.476203	0.96253	23561.8	-0.283536	0.0107431	0.167988	23561.8	-0.453789	4.35e-05	0.000885069	23561.8	-0.832807	6.85e-14
FAM234A	561.488	0.0195798	0.853128	1	561.488	-0.128702	0.215427	0.875606	561.488	0.0722969	0.506601	0.825204	561.488	-0.817307	6.98e-14	2.98e-11	561.488	-0.870808	7.53e-14
LAMC1	3850.64	-0.0228443	0.814686	1	3850.64	-0.240678	0.0131511	0.489542	3850.64	-0.140436	0.152841	0.519827	3850.64	-0.404919	3.31e-05	0.000719137	3850.64	-0.739691	9.14e-14
TTC3	1345.16	-0.138651	0.28012	1	1345.16	-0.27858	0.0287825	0.582815	1345.16	-0.264733	0.0421357	0.303342	1345.16	-0.346058	0.00682728	0.0430252	1345.16	-0.967075	1.01e-13
SMIM14	178.497	-0.295742	0.0913177	1	178.497	-0.0244437	0.886582	0.993238	178.497	-0.417668	0.0221182	0.234504	178.497	-0.903133	4.08e-07	1.97e-05	178.497	-1.29714	1.12e-13
CALR	809.505	-0.029228	0.712352	1	809.505	0.0296548	0.70236	0.991495	809.505	-0.00389299	0.963229	0.990407	809.505	0.112046	0.168233	0.381238	809.505	-0.650991	1.23e-13
KYAT1	287.921	0.122873	0.5164	1	287.921	-0.0914745	0.627415	0.986217	287.921	-0.374703	0.056485	0.343569	287.921	-0.969655	2.64e-07	1.37e-05	287.921	-1.39437	1.56e-13
CFAP97	351.584	-0.218875	0.129162	1	351.584	0.256393	0.0648355	0.713304	351.584	-0.17795	0.236529	0.625427	351.584	-0.905383	2.83e-10	4.41e-08	351.584	-1.12413	1.56e-13
SKAP2	4000.4	0.0468716	0.668908	1	4000.4	0.0442593	0.685281	0.987746	4000.4	-0.239095	0.0294008	0.2614	4000.4	-0.592577	6.11e-08	4e-06	4000.4	-0.812229	1.56e-13
LINC01089	178.436	0.0129684	0.948189	1	178.436	0.280941	0.168339	0.848271	178.436	0.0765574	0.713528	0.911473	178.436	0.567071	0.00438375	0.0308873	178.436	1.57023	1.77e-13
SOX4	3851.69	0.0333699	0.719085	1	3851.69	0.239061	0.00967948	0.465931	3851.69	0.188238	0.0428033	0.306267	3851.69	0.071383	0.440192	0.670958	3851.69	-0.693237	2.15e-13
DANCR	824.44	0.023827	0.839413	1	824.44	-0.0335679	0.772465	0.99209	824.44	0.121936	0.310539	0.687956	824.44	0.724941	4.98e-10	7.16e-08	824.44	0.890612	2.6e-13
MRRF	647.964	-0.177001	0.0917358	1	647.964	-0.0117237	0.908591	0.993238	647.964	0.25225	0.0209936	0.228382	647.964	0.494063	1.56e-06	6.07e-05	647.964	0.802045	2.72e-13
ARFGAP3	245.728	0.0206942	0.907331	1	245.728	-0.0868913	0.612512	0.983834	245.728	0.0384386	0.832088	0.954477	245.728	-0.744267	1.44e-05	0.000372557	245.728	-1.22957	3.13e-13
CYFIP1	1105.64	-0.098178	0.250156	1	1105.64	-0.118949	0.15805	0.838238	1105.64	-0.0812223	0.354643	0.722108	1105.64	-0.214514	0.0116186	0.0629748	1105.64	-0.641532	4.8e-13
P4HA1	167.434	-0.224385	0.292543	1	167.434	-0.0687482	0.726355	0.99209	167.434	0.350907	0.08209	0.404009	167.434	-0.853046	7.96e-06	0.000233726	167.434	-1.36873	4.96e-13
MRM2	817.124	0.0880685	0.512139	1	817.124	-0.145568	0.274547	0.904907	817.124	0.326444	0.0172165	0.205549	817.124	0.480406	0.000296062	0.00404469	817.124	0.98193	5.89e-13
GOLT1B	596.589	0.154124	0.343807	1	596.589	-0.0378638	0.812266	0.99209	596.589	0.28182	0.0817285	0.404009	596.589	-0.518141	0.00107926	0.0108737	596.589	-1.13827	5.94e-13
HSPBP1	1744.3	-0.176341	0.0854658	1	1744.3	-0.0280543	0.783829	0.99209	1744.3	0.261678	0.0117025	0.175168	1744.3	0.301115	0.00341597	0.0257223	1744.3	0.765587	6.69e-13
ZNF557	240.205	-0.0927346	0.652054	1	240.205	0.317946	0.118594	0.794825	240.205	0.612678	0.00335206	0.100387	240.205	1.12991	5.1e-08	3.46e-06	240.205	1.58489	6.71e-13
MZT1	3085.43	0.0085031	0.928643	1	3085.43	-0.039687	0.672817	0.987729	3085.43	0.0709569	0.457791	0.793385	3085.43	-0.139862	0.136581	0.335471	3085.43	-0.676012	9.59e-13
SZRD1	887.167	-0.0805057	0.449416	1	887.167	-0.100226	0.342839	0.938294	887.167	0.158215	0.147758	0.513322	887.167	0.318687	0.00260725	0.0211049	887.167	0.76715	1.04e-12
PRMT6	235.182	-0.110706	0.493162	1	235.182	0.229141	0.147989	0.828931	235.182	0.203952	0.225316	0.61413	235.182	0.416319	0.00801057	0.0485351	235.182	1.19401	1.09e-12
TSPAN3	1646.63	-0.0676373	0.380833	1	1646.63	-0.0960167	0.205646	0.868842	1646.63	-0.0965669	0.224787	0.613927	1646.63	-0.400739	2.43e-07	1.28e-05	1646.63	-0.573455	1.15e-12
MTHFD2L	337.011	-0.0154784	0.925381	1	337.011	0.11741	0.466267	0.961004	337.011	0.150481	0.373294	0.734311	337.011	0.813416	3.14e-07	1.57e-05	337.011	1.17345	1.15e-12
NDRG4	545.594	0.0330685	0.854732	1	545.594	0.55099	0.00211267	0.276794	545.594	0.0938615	0.606793	0.871421	545.594	-0.507847	0.00443184	0.0311015	545.594	-1.28736	1.16e-12
AEN	488.115	0.00244904	0.986204	1	488.115	0.253916	0.0681292	0.721244	488.115	0.400574	0.00524924	0.123246	488.115	0.853483	6.94e-10	9.51e-08	488.115	1.01773	1.25e-12
BTBD2	910.663	-0.127373	0.219691	1	910.663	-0.178368	0.0842879	0.750646	910.663	-0.168578	0.116219	0.466405	910.663	-0.704967	5.9e-11	1.14e-08	910.663	-0.805109	1.29e-12
NSD1	756.084	0.071601	0.433252	1	756.084	-0.088272	0.330322	0.934913	756.084	-0.0406967	0.6685	0.894529	756.084	0.353523	0.000112354	0.0018525	756.084	0.679971	1.64e-12
GMCL1	532.817	-0.189363	0.0791576	1	532.817	-0.102812	0.331637	0.934913	532.817	-0.248259	0.0267343	0.250733	532.817	-0.427876	0.00010633	0.00178467	532.817	-0.841583	1.73e-12
HOXC10	1943.55	-0.114067	0.240032	1	1943.55	-0.0303183	0.75354	0.99209	1943.55	0.372018	0.000152918	0.0195097	1943.55	0.451408	2.95e-06	0.000104426	1943.55	0.689997	1.77e-12
PFDN1	965.37	0.014613	0.891171	1	965.37	0.157619	0.132258	0.81278	965.37	0.209301	0.0577188	0.347414	965.37	0.597676	6.75e-09	6.45e-07	965.37	0.733812	1.86e-12
RARS1	1171.57	0.0498991	0.642947	1	1171.57	0.0403174	0.705668	0.991992	1171.57	-0.096278	0.382631	0.740309	1171.57	0.0535756	0.6181	0.800653	1171.57	-0.773351	2.13e-12
BLOC1S5-TXNDC5	1628.8	-0.0514306	0.523061	1	1628.8	0.109977	0.164068	0.843441	1628.8	-0.0917256	0.269254	0.654195	1628.8	0.0782455	0.326228	0.567928	1628.8	-0.568741	2.26e-12
PJVK	62.629	0.496723	0.0767783	1	62.629	0.757136	0.00607755	0.407965	62.629	1.23426	6.16e-05	0.0107224	62.629	0.866933	0.00102014	0.0104063	62.629	1.87957	2.69e-12
JUN	2043.17	0.780535	2.92e-13	7.66e-09	2043.17	0.805543	3e-14	1.35e-10	2043.17	0.403359	0.000169573	0.0212555	2043.17	-0.119046	0.258853	0.494555	2043.17	-0.748049	2.73e-12
MRPL1	483.97	0.267205	0.023717	1	483.97	0.297817	0.0100491	0.467701	483.97	0.0260901	0.830814	0.954281	483.97	0.916601	2.67e-15	2.04e-12	483.97	0.871688	2.75e-12
PGM3	325.94	0.272806	0.122232	1	325.94	-0.195648	0.253613	0.89573	325.94	-0.146877	0.418534	0.76695	325.94	-0.424798	0.0131112	0.0681897	325.94	-1.18902	3e-12
TXNDC5	1627.58	-0.0515676	0.524874	1	1627.58	0.110494	0.165168	0.845517	1627.58	-0.088372	0.290376	0.672937	1627.58	0.0750848	0.349629	0.589153	1627.58	-0.568491	3.27e-12
POLR2L	2939.37	0.00796643	0.94676	1	2939.37	0.0991088	0.405335	0.943795	2939.37	0.0284096	0.813032	0.948293	2939.37	0.463817	0.000102769	0.00173989	2939.37	0.843287	3.56e-12
IFIT1	193.358	0.291752	0.276308	1	193.358	-0.0359061	0.89166	0.993238	193.358	0.249668	0.367854	0.730081	193.358	0.665809	0.00962609	0.0552071	193.358	1.77516	3.63e-12
SHISA2	519.761	-0.124874	0.353533	1	519.761	0.0193901	0.883215	0.993238	519.761	-0.209076	0.128937	0.487404	519.761	-0.606723	8.04e-06	0.000235396	519.761	-1.01266	3.77e-12
MRM3	519.772	0.119938	0.23122	1	519.772	0.244414	0.0122807	0.481339	519.772	0.639422	4.17e-10	9.26e-07	519.772	0.112601	0.245909	0.480954	519.772	0.717856	4.15e-12
EID2	562.494	-0.0240505	0.82463	1	562.494	-0.0100099	0.924839	0.994814	562.494	-0.138464	0.221915	0.610591	562.494	0.409892	0.000105707	0.00177926	562.494	0.755623	4.61e-12
PDIA6	1615.61	-0.0539574	0.499121	1	1615.61	-0.0735798	0.351776	0.94012	1615.61	-0.179474	0.0291011	0.259701	1615.61	-0.113475	0.154338	0.360145	1615.61	-0.567358	4.62e-12
RBBP7	1142.95	-0.0417292	0.534934	1	1142.95	-0.0777591	0.23532	0.884508	1142.95	-0.12808	0.0697241	0.37813	1142.95	-0.364911	6.17e-08	4.02e-06	1142.95	-0.504703	6.01e-12
ACBD3	1441.44	0.199475	0.129692	1	1441.44	0.227855	0.0799634	0.7435	1441.44	0.0949696	0.474745	0.803527	1441.44	-0.116714	0.369071	0.607699	1441.44	-0.891753	6.25e-12
RBM15B	311.119	0.105714	0.502423	1	311.119	0.0668239	0.666322	0.986951	311.119	0.0746914	0.642843	0.885331	311.119	0.666718	1.9e-05	0.000465095	311.119	1.13893	6.47e-12
MRPL51	1035.6	-0.126431	0.186264	1	1035.6	-0.106916	0.254198	0.895961	1035.6	0.0340106	0.727152	0.917641	1035.6	0.360667	0.000142888	0.00224177	1035.6	0.662398	8.03e-12
GFPT2	542.484	-0.0544013	0.682896	1	542.484	0.023956	0.855289	0.993238	542.484	-0.207392	0.127723	0.485687	542.484	-0.893121	2.16e-11	4.98e-09	542.484	-0.931926	8.25e-12
PPM1D	314.247	0.0304664	0.8264	1	314.247	0.201829	0.126872	0.80699	314.247	0.20228	0.153808	0.520951	314.247	0.680969	1.69e-07	9.37e-06	314.247	0.917923	8.63e-12
PEA15	1181.27	0.0595134	0.502485	1	1181.27	0.0745541	0.39476	0.941267	1181.27	0.238168	0.00979468	0.160759	1181.27	0.697751	2.8e-15	2.04e-12	1181.27	0.613398	8.66e-12
HAND1	542.812	0.0511725	0.710509	1	542.812	0.232964	0.0868146	0.754718	542.812	-0.209727	0.131516	0.490262	542.812	-0.650535	1.91e-06	7.25e-05	542.812	-0.987129	8.77e-12
PSMA3-AS1	298.614	0.152995	0.24153	1	298.614	0.116568	0.364676	0.94012	298.614	0.146127	0.289089	0.671835	298.614	0.607724	3.26e-06	0.000113092	298.614	0.940392	9.19e-12
PFKP	603.71	-0.00456519	0.965237	1	603.71	0.0122652	0.905389	0.993238	603.71	-0.346716	0.00149111	0.0645582	603.71	-0.634209	2.15e-09	2.48e-07	603.71	-0.781522	9.31e-12
LDHA	6121.77	0.045581	0.581837	1	6121.77	-0.0611164	0.458289	0.961004	6121.77	-0.157932	0.0577105	0.347414	6121.77	-0.168937	0.0400296	0.147994	6121.77	-0.566072	9.75e-12
RNF26	313.299	-0.232531	0.0718522	1	313.299	-0.294221	0.0213277	0.544542	313.299	0.14678	0.279657	0.662954	313.299	0.519324	4.48e-05	0.000908031	313.299	0.901731	9.83e-12
RAB31	543.935	-0.167643	0.187685	1	543.935	0.103096	0.410215	0.944969	543.935	0.0655265	0.613515	0.873112	543.935	-0.421237	0.00118807	0.0117882	543.935	-0.912134	1.02e-11
TMEM106B	408.548	0.027371	0.811782	1	408.548	-0.105262	0.340309	0.938294	408.548	0.00873028	0.940835	0.984715	408.548	-0.662614	4.24e-09	4.42e-07	408.548	-0.805408	1.1e-11
PAG1	547.673	-0.10723	0.3901	1	547.673	-0.10828	0.380686	0.941267	547.673	-0.396069	0.00237132	0.082974	547.673	-0.265994	0.0359387	0.13738	547.673	-0.92834	1.14e-11
CBLL1	681.347	-0.224169	0.0942455	1	681.347	0.23906	0.0711023	0.728273	681.347	0.278798	0.0397562	0.295116	681.347	0.742327	1.56e-08	1.27e-06	681.347	0.912805	1.14e-11
UQCRQ	6697.33	0.113929	0.213524	1	6697.33	-0.0334592	0.713903	0.99209	6697.33	0.188675	0.0399685	0.295684	6697.33	0.228036	0.0125063	0.0661329	6697.33	0.621365	1.21e-11
HSD17B10	867.449	-0.0153832	0.89008	1	867.449	-0.0185054	0.866452	0.993238	867.449	0.316254	0.00522746	0.123107	867.449	0.451591	5.37e-05	0.00104475	867.449	0.795391	1.22e-11
METTL7A	1459.33	-0.111375	0.452717	1	1459.33	-0.158697	0.282633	0.91022	1459.33	-0.349017	0.0194768	0.220326	1459.33	0.0903257	0.54009	0.747912	1459.33	1.00628	1.27e-11
BIRC5	534.033	0.0169046	0.859982	1	534.033	0.155933	0.0918423	0.760283	534.033	0.118976	0.227551	0.617463	534.033	0.264909	0.00446688	0.0311959	534.033	0.635567	1.3e-11
ANXA2	3466.04	-0.123039	0.0656836	1	3466.04	-0.0992206	0.132977	0.81278	3466.04	-0.110852	0.102603	0.443482	3466.04	-0.103367	0.118702	0.307191	3466.04	-0.454673	1.52e-11
POLR3D	224.516	0.177262	0.264772	1	224.516	0.251684	0.108693	0.777773	224.516	0.268932	0.105935	0.448641	224.516	-0.155146	0.317266	0.558774	224.516	-1.13915	1.65e-11
PAM	145.839	-0.037165	0.812973	1	145.839	-0.189135	0.200996	0.864244	145.839	-0.628161	0.000100119	0.014963	145.839	-0.590599	8.96e-05	0.00156664	145.839	-1.09892	1.66e-11
HMGCS1	215.496	-0.0453888	0.785639	1	215.496	-0.0270668	0.866861	0.993238	215.496	-0.253069	0.144125	0.508334	215.496	-0.751454	7.12e-06	0.000216437	215.496	-1.12917	1.75e-11
LOC107984658	130.561	-0.16597	0.409768	1	130.561	-0.0644246	0.740731	0.99209	130.561	0.148632	0.480446	0.807742	130.561	0.763511	0.000138633	0.00220085	130.561	1.46355	1.85e-11
UAP1	263.032	0.0373997	0.774441	1	263.032	0.0486254	0.697176	0.988849	263.032	0.338324	0.0119409	0.175797	263.032	-0.329037	0.00911034	0.0532971	263.032	-0.897252	1.97e-11
LSMEM1	731.892	-0.177336	0.563754	1	731.892	0.565584	0.0649439	0.713657	731.892	0.34373	0.264737	0.649719	731.892	2.14483	1.71e-12	5.17e-10	731.892	2.03145	2.25e-11
FDFT1	970.745	-0.0229735	0.827872	1	970.745	0.0481366	0.642978	0.986263	970.745	-0.00932594	0.930537	0.981553	970.745	-0.219405	0.0348877	0.134818	970.745	-0.707698	2.29e-11
BAIAP2L1	463.497	0.0807616	0.450835	1	463.497	-0.213928	0.0421684	0.646492	463.497	-0.0397842	0.720915	0.914709	463.497	-0.354819	0.000935304	0.00976723	463.497	-0.779794	2.52e-11
MAGED2	640.18	-0.179295	0.0708502	1	640.18	-0.00215416	0.981864	0.999254	640.18	-0.114114	0.264804	0.649719	640.18	-0.111116	0.241234	0.475656	640.18	-0.626897	2.83e-11
LIN52	601.833	0.0428847	0.725395	1	601.833	0.16078	0.177299	0.853717	601.833	0.369209	0.00268969	0.090099	601.833	0.599646	4.88e-07	2.28e-05	601.833	0.810942	2.84e-11
FXYD6	225.233	-0.239871	0.129233	1	225.233	-0.440351	0.0046292	0.369309	225.233	-0.19899	0.219639	0.607878	225.233	-0.890668	1.26e-08	1.07e-06	225.233	-1.08978	2.91e-11
TRIAP1	3171.23	0.0990851	0.399059	1	3171.23	0.200023	0.0871133	0.754718	3171.23	0.262443	0.0262111	0.249872	3171.23	0.574498	8.69e-07	3.72e-05	3171.23	0.779983	3.02e-11
SNRNP27	758.21	0.17409	0.108742	1	758.21	0.242027	0.0227485	0.546697	758.21	0.099906	0.371042	0.732755	758.21	-0.0645092	0.548146	0.753014	758.21	-0.722407	3.23e-11
FDPS	837.531	-0.124048	0.123696	1	837.531	-0.0595488	0.447359	0.956357	837.531	-0.0780809	0.350422	0.719976	837.531	-0.19244	0.0162053	0.079019	837.531	-0.568478	3.29e-11
KRTAP19-1	345.453	-0.263164	0.200468	1	345.453	-0.298118	0.133653	0.813528	345.453	-0.0101591	0.960523	0.989663	345.453	-0.299331	0.106861	0.28571	345.453	1.18935	4.58e-11
AUP1	4852.14	0.0890802	0.324242	1	4852.14	-0.108297	0.229448	0.882374	4852.14	0.109705	0.227327	0.617071	4852.14	0.433682	1.5e-06	5.87e-05	4852.14	0.597426	5.21e-11
MRPL40	535.903	0.0731796	0.610791	1	535.903	-0.287506	0.0404984	0.641207	535.903	0.205252	0.160432	0.529492	535.903	0.548778	8.71e-05	0.00153111	535.903	0.931361	6.49e-11
ALCAM	406.198	-0.109991	0.460631	1	406.198	-0.162402	0.268029	0.899985	406.198	-0.400382	0.00960989	0.159921	406.198	-0.551219	0.000208234	0.00304	406.198	-1.01951	6.57e-11
LOC101929977	49.9092	0.314195	0.507903	1	49.9092	1.97006	5.65e-05	0.0421353	49.9092	0.630117	0.183484	0.566143	49.9092	0.928223	0.0385835	0.144487	49.9092	3.1552	6.66e-11
MTRF1L	300.343	0.0114355	0.923882	1	300.343	0.0929395	0.409118	0.944969	300.343	-0.0364517	0.769929	0.93284	300.343	0.658744	3.39e-09	3.73e-07	300.343	0.750679	6.67e-11
ALDH3A1	23.8932	0.0772193	0.852491	1	23.8932	-0.12705	0.757212	0.99209	23.8932	1.18996	0.00987396	0.161378	23.8932	1.55127	9.3e-05	0.00161659	23.8932	3.04825	6.75e-11
NUDT16L1	819.519	0.0238292	0.840648	1	819.519	0.0895381	0.446674	0.956047	819.519	0.207793	0.0885405	0.417152	819.519	0.60618	3.61e-07	1.77e-05	819.519	0.812981	6.91e-11
RADIL	250.734	-0.0328429	0.818711	1	250.734	-0.085912	0.543988	0.97406	250.734	0.387217	0.00813741	0.149314	250.734	-0.940605	1.5e-10	2.76e-08	250.734	-1.12473	7.15e-11
RRAS	321.36	-0.253411	0.175461	1	321.36	0.162582	0.383039	0.941267	321.36	0.169442	0.378218	0.737227	321.36	-0.480652	0.00878339	0.0517387	321.36	-1.19585	8.08e-11
H2AX	712.585	0.0302245	0.877408	1	712.585	0.14497	0.457824	0.961004	712.585	0.239605	0.226756	0.616239	712.585	0.862302	1.2e-05	0.000321957	712.585	1.28343	8.58e-11
SNHG30	184.116	-0.146974	0.375565	1	184.116	0.348267	0.0320717	0.593547	184.116	0.0647093	0.713075	0.911473	184.116	0.265087	0.1042	0.280762	184.116	1.08883	8.77e-11
HMGCR	333.943	0.0543246	0.646333	1	333.943	-0.00374603	0.973896	0.9983	333.943	-0.508069	6.23e-05	0.0107224	333.943	-0.19555	0.100385	0.273994	333.943	-0.79928	9.42e-11
MAP1A	183.948	0.173682	0.314422	1	183.948	-0.283136	0.0982368	0.760283	183.948	-0.674065	0.000280388	0.0264561	183.948	0.639243	0.000811856	0.00881392	183.948	1.40059	9.73e-11
KCNQ1OT1	1004.8	-0.12979	0.436	1	1004.8	-0.183462	0.270269	0.90025	1004.8	-0.589221	0.000511787	0.0369987	1004.8	-1.08256	1.14e-10	2.14e-08	1004.8	-1.08804	1.01e-10
DOLPP1	508.584	0.225081	0.0499147	1	508.584	0.194813	0.0834452	0.749143	508.584	0.247905	0.0354381	0.281315	508.584	0.612543	4.63e-08	3.21e-06	508.584	0.743257	1.09e-10
HOXC6	1227.71	-0.0781008	0.356926	1	1227.71	-0.170682	0.0415081	0.643186	1227.71	-0.0219101	0.80354	0.944345	1227.71	0.18368	0.0291357	0.119657	1227.71	0.549925	1.1e-10
RP9	329.125	0.114938	0.443968	1	329.125	0.212634	0.148119	0.829184	329.125	0.508104	0.000805819	0.0458786	329.125	1.1037	1.41e-14	7.24e-12	329.125	0.948934	1.14e-10
ATXN7L3B	708.855	-0.139992	0.121601	1	708.855	-0.0799816	0.372623	0.94012	708.855	-0.035439	0.71167	0.911044	708.855	0.437974	1.75e-06	6.72e-05	708.855	0.623733	1.23e-10
MIR4458HG	200.923	0.475966	0.00622595	1	200.923	0.223027	0.180418	0.856759	200.923	-0.131413	0.471495	0.801273	200.923	0.323012	0.0438263	0.157128	200.923	1.05672	1.25e-10
ATP6V0C	7022.04	0.0303145	0.713551	1	7022.04	-0.104803	0.203662	0.865242	7022.04	0.207401	0.0126196	0.180365	7022.04	0.359844	1.39e-05	0.000360807	7022.04	0.53643	1.34e-10
SDC2	504.266	-0.101344	0.276635	1	504.266	-0.30658	0.000475451	0.126985	504.266	-0.119837	0.223719	0.612301	504.266	-0.497759	1.94e-08	1.51e-06	504.266	-0.568461	1.35e-10
OAF	182.494	-0.0624316	0.627854	1	182.494	-0.160057	0.198137	0.86414	182.494	-0.126882	0.359993	0.726011	182.494	-0.642856	7.77e-07	3.4e-05	182.494	-0.965813	1.47e-10
FAM114A1	69.9281	-0.257622	0.288165	1	69.9281	-0.556185	0.0191356	0.532813	69.9281	-0.23211	0.375067	0.735365	69.9281	-0.861066	0.000533416	0.00646239	69.9281	-1.54837	1.56e-10
LOC101559451	83.1013	-0.197969	0.510392	1	83.1013	0.102281	0.726694	0.99209	83.1013	0.216803	0.467752	0.800103	83.1013	0.145434	0.597817	0.787589	83.1013	1.81257	1.72e-10
IPO7	1708.18	-0.0109415	0.891645	1	1708.18	0.014298	0.856087	0.993238	1708.18	-0.169981	0.0387878	0.292234	1708.18	-0.525459	5.12e-11	1.03e-08	1708.18	-0.51882	1.81e-10
XPO7	960.461	-0.0850051	0.368142	1	960.461	-0.0662086	0.474417	0.962416	960.461	-0.281296	0.00404802	0.111783	960.461	-0.122481	0.186753	0.406869	960.461	-0.611365	1.93e-10
PIGM	497.775	0.0548075	0.68503	1	497.775	0.107973	0.418221	0.945317	497.775	0.262549	0.0570058	0.344818	497.775	0.411135	0.0022106	0.0186703	497.775	0.909107	1.94e-10
LOC101060179	153.594	-0.466087	0.0636265	1	153.594	0.393619	0.119978	0.798471	153.594	0.6086	0.019797	0.222153	153.594	1.25272	8.13e-07	3.52e-05	153.594	1.67468	2.03e-10
C12orf43	407.482	-0.128148	0.23799	1	407.482	0.232753	0.0281091	0.582815	407.482	0.148661	0.189388	0.572294	407.482	0.477105	9.11e-06	0.000261013	407.482	0.734665	2.06e-10
GPX8	550.828	-0.187686	0.0864018	1	550.828	-0.096698	0.359493	0.94012	550.828	0.0232009	0.836622	0.955955	550.828	-0.275576	0.00893453	0.0525012	550.828	-0.680648	2.15e-10
ADD2	887.586	-0.0924076	0.44367	1	887.586	-0.226638	0.058126	0.69925	887.586	0.109224	0.37253	0.734273	887.586	-0.635169	1.66e-07	9.25e-06	887.586	-0.812758	2.18e-10
ANXA6	1880.24	-0.0884382	0.312156	1	1880.24	-0.0242357	0.780164	0.99209	1880.24	-0.231612	0.00917633	0.15694	1880.24	-0.280706	0.00131345	0.012732	1880.24	-0.568254	2.32e-10
PPHLN1	706.824	0.154536	0.16245	1	706.824	0.210581	0.0513019	0.685547	706.824	0.017121	0.878997	0.970055	706.824	0.395222	0.000302338	0.00411629	706.824	0.72969	2.36e-10
CASP7	585.692	0.298785	0.0104374	1	585.692	-0.0960922	0.398002	0.94274	585.692	-0.142957	0.238183	0.626805	585.692	-0.391841	0.000671677	0.00765238	585.692	-0.741559	2.39e-10
SLC3A2	2502.94	0.107468	0.400328	1	2502.94	0.348705	0.00614072	0.407965	2502.94	0.404947	0.00161312	0.0660843	2502.94	0.679719	9.46e-08	5.87e-06	2502.94	0.806851	2.51e-10
TOMM40	1723.76	0.00440782	0.975197	1	1723.76	-0.0732723	0.605205	0.982743	1723.76	0.40436	0.00468944	0.118233	1723.76	0.545492	0.000129099	0.00207215	1723.76	0.920659	2.57e-10
ZNF503	12427.9	0.134092	0.077934	1	12427.9	0.14415	0.0576865	0.69925	12427.9	0.0756211	0.321507	0.696762	12427.9	0.389595	2.96e-07	1.51e-05	12427.9	0.483795	2.59e-10
SF3B4	1033.9	0.109223	0.24138	1	1033.9	0.112858	0.221941	0.878205	1033.9	0.212245	0.0272279	0.250779	1033.9	0.398	2.31e-05	0.000543883	1033.9	0.622724	2.84e-10
RPP38	1010.16	0.0558667	0.645063	1	1010.16	0.13084	0.272773	0.902245	1010.16	0.302634	0.0142485	0.187523	1010.16	0.448487	0.000149975	0.00232749	1010.16	0.758184	2.87e-10
RNF157	311.784	-0.0419287	0.821589	1	311.784	-0.0509936	0.782675	0.99209	311.784	0.0503542	0.790382	0.939128	311.784	-1.15348	1.8e-09	2.24e-07	311.784	-1.26297	2.97e-10
RNF125	224.135	-0.0961242	0.493834	1	224.135	0.0443482	0.743896	0.99209	224.135	-0.195154	0.184704	0.566925	224.135	-0.399005	0.0045016	0.0313773	224.135	-1.00684	3.03e-10
SFXN2	175.094	-0.0854146	0.567134	1	175.094	0.100019	0.497399	0.964518	175.094	0.135934	0.387425	0.742784	175.094	0.726676	1.08e-05	0.000298045	175.094	1.59578	3.27e-10
ZNF703	1334.38	-0.106853	0.232383	1	1334.38	-0.0602794	0.497905	0.964518	1334.38	0.177852	0.0514167	0.331881	1334.38	0.338288	0.000160035	0.00244703	1334.38	0.575151	3.36e-10
COPG1	440.973	0.0728197	0.624539	1	440.973	0.128802	0.377154	0.941267	440.973	-0.0366051	0.807313	0.946452	440.973	0.0587291	0.690591	0.846614	440.973	-0.93224	3.56e-10
KIF1A	1219.37	-0.0237791	0.850254	1	1219.37	-0.209183	0.0956095	0.760283	1219.37	-0.0324193	0.799796	0.942688	1219.37	-0.288649	0.0224884	0.1	1219.37	-0.816322	3.74e-10
INSR	425.677	0.0586289	0.656254	1	425.677	-0.0764796	0.557042	0.976324	425.677	-0.0479865	0.723171	0.916001	425.677	-0.76059	3.04e-08	2.22e-06	425.677	-0.906155	4.05e-10
IFI6	138.789	0.176797	0.33715	1	138.789	-0.110291	0.527342	0.968382	138.789	0.359603	0.0553437	0.340739	138.789	0.0548203	0.751224	0.882911	138.789	1.04815	4.44e-10
H2BC5	78.9433	0.27907	0.382463	1	78.9433	0.107543	0.715365	0.99209	78.9433	0.647614	0.0335583	0.275539	78.9433	1.76336	2.86e-10	4.41e-08	78.9433	1.69609	5.11e-10
ARPC4	559.262	0.0153177	0.907933	1	559.262	0.309334	0.018974	0.532205	559.262	-0.013321	0.921635	0.979351	559.262	0.532737	8.77e-05	0.00153804	559.262	0.953667	5.13e-10
ARMC7	63.6977	0.424836	0.097482	1	63.6977	0.0210206	0.935118	0.99546	63.6977	0.440074	0.108166	0.452552	63.6977	0.876717	0.000884257	0.00939629	63.6977	1.81882	5.13e-10
AHCYL1	1738.79	0.19655	0.0681607	1	1738.79	0.16433	0.124403	0.80699	1738.79	-0.114732	0.290244	0.672822	1738.79	-0.604037	2.2e-08	1.69e-06	1738.79	-0.685598	5.31e-10
TMEM203	301.923	0.0781618	0.613714	1	301.923	0.130089	0.387153	0.941267	301.923	-0.0418003	0.791605	0.939542	301.923	0.434618	0.00363033	0.0268641	301.923	0.964157	5.38e-10
HDLBP	4909.62	-0.0729804	0.296691	1	4909.62	-0.105927	0.128743	0.809482	4909.62	-0.135791	0.055033	0.340365	4909.62	-0.0111765	0.873172	0.942023	4909.62	-0.440176	5.43e-10
LTO1	76.017	0.37042	0.091803	1	76.017	0.458317	0.0291161	0.582815	76.017	0.601822	0.00862481	0.152683	76.017	0.680676	0.00169801	0.0152255	76.017	1.66925	5.54e-10
ATF4	1990.85	-0.0423577	0.60608	1	1990.85	0.0516901	0.524278	0.968306	1990.85	0.15454	0.063698	0.363724	1990.85	0.35213	1.51e-05	0.000388087	1990.85	0.514323	5.73e-10
RBM3	3185.55	-0.0113426	0.911763	1	3185.55	0.0879169	0.389129	0.941267	3185.55	0.0103462	0.920111	0.979351	3185.55	0.508554	8.92e-07	3.78e-05	3185.55	0.683222	5.92e-10
SMIM12	256.6	-0.0157075	0.900896	1	256.6	-0.162042	0.191661	0.863591	256.6	0.032708	0.806762	0.946164	256.6	0.492287	0.000147989	0.00230159	256.6	0.862947	6.07e-10
C11orf96	150.789	0.214781	0.353215	1	150.789	0.156987	0.482806	0.964518	150.789	0.0951893	0.683991	0.900913	150.789	-0.824634	0.000170736	0.00257539	150.789	-1.38438	6.17e-10
FBXO17	843.076	-0.0455546	0.562016	1	843.076	-0.188924	0.0121964	0.481339	843.076	0.022715	0.778713	0.935244	843.076	-0.286671	0.000126319	0.00203878	843.076	-0.477362	6.27e-10
BRD8	549.736	-0.0426416	0.741237	1	549.736	-0.108181	0.396096	0.941956	549.736	-0.157989	0.235858	0.624993	549.736	0.130971	0.306311	0.547766	549.736	0.804109	6.42e-10
IMPA2	213.171	0.0249114	0.883066	1	213.171	-0.416047	0.0132725	0.489542	213.171	0.060285	0.731439	0.918093	213.171	-1.30368	1.97e-13	6.97e-11	213.171	-1.21211	6.8e-10
TBC1D4	354.35	0.116399	0.302301	1	354.35	-0.0713192	0.514322	0.968306	354.35	-0.300045	0.0117881	0.175501	354.35	-0.380819	0.00096608	0.0100023	354.35	-0.805204	6.81e-10
ZNF317	2459.51	0.252064	0.0476062	1	2459.51	0.223811	0.0782228	0.739361	2459.51	0.0373674	0.770344	0.93284	2459.51	0.717135	1.53e-08	1.25e-06	2459.51	0.786588	6.96e-10
RAB21	406.377	-0.160783	0.172059	1	406.377	0.141516	0.21243	0.87315	406.377	0.150038	0.217301	0.604962	406.377	0.451016	9.32e-05	0.00161725	406.377	0.732595	6.98e-10
TIMELESS	526.897	-0.111898	0.309417	1	526.897	-0.132665	0.223608	0.878205	526.897	0.173409	0.128099	0.486407	526.897	-0.680708	1.89e-09	2.32e-07	526.897	-0.761278	7.04e-10
HNRNPDL	3092.72	0.0387857	0.593468	1	3092.72	0.101232	0.161312	0.839905	3092.72	-0.218969	0.003273	0.0990601	3092.72	0.539706	9e-14	3.73e-11	3092.72	0.461059	7.04e-10
KPNB1	7691.35	-0.0180134	0.79528	1	7691.35	-0.0234802	0.734395	0.99209	7691.35	0.109151	0.118112	0.470121	7691.35	-0.0883791	0.202109	0.426592	7691.35	-0.430845	7.15e-10
CNOT6	592.011	-0.115197	0.348622	1	592.011	-0.00286536	0.981196	0.999254	592.011	-0.191972	0.129637	0.48863	592.011	0.307296	0.0122982	0.0653416	592.011	0.783949	7.7e-10
LITAF	1029.16	-0.178859	0.159221	1	1029.16	-0.0638002	0.612743	0.983834	1029.16	-0.0720729	0.575861	0.858406	1029.16	-0.283282	0.0259651	0.110737	1029.16	-0.798525	8.02e-10
ZNF319	130.18	0.474985	0.156982	1	130.18	0.21196	0.525137	0.968306	130.18	0.648374	0.0556263	0.341334	130.18	0.801314	0.0162001	0.079019	130.18	2.12571	8.05e-10
ZBTB18	242.73	-0.0279473	0.878254	1	242.73	0.135325	0.448234	0.956506	242.73	0.283886	0.125686	0.48319	242.73	0.878497	8.63e-07	3.71e-05	242.73	1.16336	8.09e-10
TET1	648.368	-0.0652824	0.5724	1	648.368	-0.0456913	0.690116	0.988703	648.368	-0.381218	0.00147516	0.064295	648.368	-0.501129	1.75e-05	0.000436986	648.368	-0.738007	8.36e-10
TSPYL4	320.248	-0.13896	0.405231	1	320.248	-0.184285	0.260237	0.899184	320.248	-0.21737	0.211198	0.598156	320.248	0.792948	8.4e-07	3.62e-05	320.248	1.0063	8.62e-10
CTTNBP2NL	741.057	0.0535804	0.589545	1	741.057	0.0629946	0.51381	0.968306	741.057	0.053397	0.597828	0.867635	741.057	0.337906	0.000387133	0.00499866	741.057	0.59581	9.84e-10
CDKN2C	4130.12	-0.0286111	0.76687	1	4130.12	-0.257996	0.00728272	0.431202	4130.12	-0.317228	0.00111508	0.0548473	4130.12	0.0925893	0.335825	0.577233	4130.12	0.587518	1.07e-09
MRPL17	403.936	-0.0702908	0.576228	1	403.936	0.231621	0.0599612	0.69977	403.936	-0.224048	0.0936567	0.427646	403.936	-0.323088	0.00985224	0.0561891	403.936	-0.796683	1.12e-09
HNRNPA0	1158.14	0.0561548	0.649117	1	1158.14	-0.0498567	0.684254	0.987729	1158.14	0.10817	0.387339	0.742784	1158.14	0.618661	4.45e-07	2.13e-05	1158.14	0.757231	1.14e-09
CDC20	521.812	-0.0728711	0.63463	1	521.812	-0.0272046	0.857769	0.993238	521.812	-0.158668	0.310466	0.687894	521.812	0.31277	0.0426645	0.15405	521.812	0.961972	1.14e-09
CUL4B	462.682	-0.278453	0.00660929	1	462.682	-0.230997	0.0192747	0.532994	462.682	-0.533822	8.86e-07	0.000529409	462.682	-0.377747	9.85e-05	0.00168866	462.682	-0.623023	1.17e-09
CBX6	1746.62	0.0273217	0.808856	1	1746.62	-0.033657	0.765195	0.99209	1746.62	0.452668	7.8e-05	0.0126746	1746.62	0.491016	1.72e-05	0.00043018	1746.62	0.705578	1.23e-09
YIPF6	1138.6	0.0739212	0.448607	1	1138.6	0.0758716	0.426098	0.948357	1138.6	0.114536	0.249607	0.63798	1138.6	-0.159161	0.0971327	0.268696	1138.6	-0.585087	1.27e-09
GPATCH4	942.549	0.00506601	0.963502	1	942.549	0.341995	0.00179397	0.259841	942.549	0.307315	0.00641995	0.133225	942.549	0.737634	2.5e-11	5.51e-09	942.549	0.722936	1.33e-09
FLOT2	297.902	0.0937644	0.443665	1	297.902	-0.200543	0.0987274	0.760283	297.902	0.11866	0.356786	0.72358	297.902	-0.542771	1.86e-05	0.000458896	297.902	-0.857101	1.36e-09
RCN1	633.004	-0.0439208	0.653324	1	633.004	0.104561	0.272105	0.902233	633.004	0.0511265	0.60881	0.8721	633.004	-0.00331706	0.972421	0.988034	633.004	-0.60385	1.39e-09
TTPAL	84.8563	-0.207362	0.333687	1	84.8563	0.0509642	0.812565	0.99209	84.8563	0.0309224	0.891531	0.97154	84.8563	-0.0796277	0.730959	0.870164	84.8563	1.87752	1.45e-09
SRM	3635.82	-0.0270693	0.721072	1	3635.82	-0.0468626	0.535328	0.970285	3635.82	0.15834	0.0395924	0.295069	3635.82	0.399959	1.63e-07	9.11e-06	3635.82	0.483337	1.46e-09
IQGAP1	1047.94	-0.00354907	0.971267	1	1047.94	-0.0447546	0.644596	0.986263	1047.94	-0.140126	0.166408	0.539086	1047.94	-0.229618	0.0197097	0.0910921	1047.94	-0.611701	1.52e-09
H1-0	338.614	-0.0065492	0.961593	1	338.614	0.349366	0.00823429	0.446768	338.614	0.283702	0.0421827	0.30354	338.614	0.730336	1.13e-08	9.9e-07	338.614	0.77845	1.57e-09
WEE1	544.834	0.0417	0.680069	1	544.834	0.0392464	0.684908	0.987729	544.834	-0.0139473	0.894454	0.972182	544.834	0.450796	2.14e-06	7.97e-05	544.834	0.58247	1.66e-09
PRRC1	579.596	-0.00649554	0.962697	1	579.596	0.224206	0.0992252	0.760283	579.596	-0.257241	0.0686409	0.374644	579.596	-0.200121	0.139031	0.339024	579.596	-0.817868	1.69e-09
RRBP1	167.51	-0.135264	0.484956	1	167.51	-0.319651	0.0970587	0.760283	167.51	-0.164166	0.417891	0.766474	167.51	-0.216474	0.273996	0.51283	167.51	-1.28745	1.75e-09
VIM	2638.47	-0.217449	0.0185079	1	2638.47	-0.230751	0.0120383	0.481339	2638.47	0.0100516	0.914431	0.977981	2638.47	-0.00482111	0.958293	0.980762	2638.47	-0.561057	1.79e-09
CSRP2	341.187	-0.211679	0.0888059	1	341.187	0.103054	0.386366	0.941267	341.187	-0.175531	0.173656	0.551948	341.187	-0.2287	0.0500616	0.17228	341.187	-0.723906	1.8e-09
ACTA1	74.067	-0.0650373	0.859851	1	74.067	0.147289	0.678086	0.987729	74.067	0.388096	0.289758	0.672296	74.067	1.84211	2.08e-07	1.13e-05	74.067	2.27499	1.81e-09
CTC-338M12.4	700.361	-0.0879608	0.454995	1	700.361	-0.165469	0.15524	0.837896	700.361	-0.0728773	0.548467	0.847062	700.361	-0.0623279	0.583662	0.77868	700.361	0.679212	1.88e-09
OVCA2	405.824	0.0750924	0.537847	1	405.824	-0.107233	0.370228	0.94012	405.824	0.638668	3.94e-07	0.000291709	405.824	0.618447	3.1e-07	1.56e-05	405.824	0.790367	1.95e-09
MAN2A1	458.472	-0.163717	0.266348	1	458.472	-0.126775	0.379312	0.941267	458.472	0.0744067	0.622318	0.87732	458.472	-0.554171	0.000157803	0.00242054	458.472	-0.902523	1.97e-09
LINC00641	148.359	0.387475	0.079525	1	148.359	-0.0272233	0.898438	0.993238	148.359	0.317026	0.157638	0.525833	148.359	1.21598	6.53e-09	6.32e-07	148.359	1.31264	2.09e-09
TUFM	3373.65	-0.106875	0.131698	1	3373.65	-0.130378	0.0646774	0.713299	3373.65	0.0916572	0.202119	0.587037	3373.65	0.133232	0.0601958	0.195879	3373.65	0.44049	2.18e-09
COL5A1	182.438	-0.0704937	0.747688	1	182.438	-0.146773	0.49972	0.965648	182.438	-0.348572	0.122709	0.47929	182.438	-0.670773	0.00306749	0.0237206	182.438	-1.43083	2.28e-09
MAPK8IP2	160.985	-0.226684	0.300909	1	160.985	-0.0719303	0.741685	0.99209	160.985	0.0853378	0.707058	0.909896	160.985	0.2859	0.203118	0.42798	160.985	1.55232	2.29e-09
AK2	2919.1	0.0173808	0.799767	1	2919.1	0.0167017	0.805196	0.99209	2919.1	0.0916654	0.189024	0.572063	2919.1	0.403435	2.29e-09	2.58e-07	2919.1	0.412926	2.37e-09
LOC105371083	37.3944	-0.28662	0.561389	1	37.3944	-0.00761577	0.987609	0.999254	37.3944	-0.829242	0.126545	0.484236	37.3944	0.730981	0.135484	0.333905	37.3944	3.50282	2.4e-09
LARS1	2084.8	-0.134526	0.0264373	1	2084.8	0.0749207	0.208555	0.870698	2084.8	0.0653371	0.289024	0.671835	2084.8	-0.0793589	0.186825	0.406869	2084.8	-0.384246	2.57e-09
SND1	3758.57	-0.00489148	0.956553	1	3758.57	-0.115441	0.196409	0.86414	3758.57	0.157208	0.0821705	0.404009	3758.57	0.093904	0.294451	0.534115	3758.57	-0.538938	2.59e-09
DPH1	421.711	0.0955461	0.441462	1	421.711	-0.111597	0.359856	0.94012	421.711	0.606805	2.05e-06	0.000971015	421.711	0.597669	1.2e-06	4.9e-05	421.711	0.792441	2.62e-09
NRN1	271.201	-0.0265357	0.881793	1	271.201	-0.155941	0.369051	0.94012	271.201	-0.162184	0.366795	0.729606	271.201	-0.4819	0.00464609	0.0320811	271.201	-1.0633	2.71e-09
SRSF2	6920.94	-0.0872077	0.394254	1	6920.94	-0.0814566	0.425785	0.948357	6920.94	0.128351	0.212705	0.599524	6920.94	0.589053	9.21e-09	8.36e-07	6920.94	0.613387	2.85e-09
UBAP1	1710.92	0.0540182	0.51639	1	1710.92	0.188006	0.0222343	0.546697	1710.92	0.494342	6.06e-09	9.43e-06	1710.92	0.500223	7.89e-10	1.05e-07	1710.92	0.489079	2.97e-09
ZNF776	90.6215	0.0662626	0.80099	1	90.6215	0.165454	0.525024	0.968306	90.6215	0.272861	0.310426	0.687894	90.6215	0.835683	0.00101541	0.0103799	90.6215	1.56167	2.97e-09
TIPIN	409.757	-0.0275083	0.874481	1	409.757	0.20426	0.232879	0.88413	409.757	0.224709	0.202244	0.587037	409.757	0.594456	0.000518195	0.00634563	409.757	1.04611	3.1e-09
SNHG12	358.443	0.139013	0.318228	1	358.443	0.158616	0.250734	0.894467	358.443	0.669467	3.71e-06	0.00144277	358.443	0.531551	0.000135439	0.00215723	358.443	0.841822	3.14e-09
PPP1R13L	215.431	-0.0621059	0.722076	1	215.431	-0.365432	0.0335674	0.602653	215.431	0.0339184	0.851773	0.9604	215.431	-0.619312	0.000362422	0.00476373	215.431	-1.02748	3.21e-09
LARP6	612.544	-0.174637	0.171034	1	612.544	-0.000758913	0.995192	0.999254	612.544	0.200728	0.126067	0.483936	612.544	0.340752	0.0068104	0.0429692	612.544	0.75118	3.34e-09
ZNF473	237.336	0.230102	0.299432	1	237.336	0.61538	0.00495181	0.372269	237.336	0.291418	0.203822	0.587603	237.336	1.1192	2.31e-07	1.23e-05	237.336	1.32108	3.37e-09
FAM219A	739.482	0.0233885	0.848788	1	739.482	0.0954798	0.433693	0.951072	739.482	0.0535887	0.670723	0.895878	739.482	-0.53185	1.84e-05	0.000455693	739.482	-0.747178	4.17e-09
MRPL4	1867.48	-0.00202808	0.987448	1	1867.48	0.0802432	0.532831	0.969181	1867.48	0.233133	0.0725841	0.384908	1867.48	0.561178	1.38e-05	0.000360097	1867.48	0.77002	4.32e-09
EGFR	90.3723	-0.179953	0.42673	1	90.3723	-0.127989	0.570174	0.979131	90.3723	-0.443416	0.0750597	0.390446	90.3723	-0.642099	0.00475067	0.0324507	90.3723	-1.41957	4.77e-09
FGFR1OP	372.045	-0.112261	0.455056	1	372.045	0.152183	0.301482	0.924963	372.045	0.226127	0.138917	0.5008	372.045	0.723642	8.93e-07	3.78e-05	372.045	0.9059	4.81e-09
STAT6	442.162	0.0752972	0.512281	1	442.162	-0.138449	0.223151	0.878205	442.162	-0.102474	0.394104	0.748298	442.162	-0.576329	9.47e-07	3.98e-05	442.162	-0.76393	4.82e-09
PTAFR	29.2885	0.242327	0.61892	1	29.2885	0.653515	0.137885	0.820564	29.2885	1.16929	0.00896602	0.155882	29.2885	2.54544	2.26e-09	2.57e-07	29.2885	2.57611	4.92e-09
ZCCHC3	638.907	0.12158	0.25987	1	638.907	0.125248	0.234665	0.884508	638.907	0.116307	0.295901	0.677061	638.907	0.480267	4.5e-06	0.00014687	638.907	0.6361	5.11e-09
EPAS1	1140.61	-0.0571836	0.666429	1	1140.61	-0.185224	0.161211	0.839905	1140.61	-0.36492	0.00681064	0.136107	1140.61	-0.77253	7.12e-09	6.68e-07	1140.61	-0.806704	5.19e-09
ASF1A	383.744	0.139699	0.321292	1	383.744	0.348566	0.0113836	0.481339	383.744	0.0802692	0.583752	0.862805	383.744	0.866174	3.12e-10	4.78e-08	383.744	0.833032	5.51e-09
KAT6A	2055.03	0.0688271	0.496996	1	2055.03	0.2161	0.0319317	0.593527	2055.03	0.156276	0.125309	0.482697	2055.03	0.319265	0.00154595	0.0143126	2055.03	0.597736	5.57e-09
UBE2J2	284.928	-0.0242506	0.886829	1	284.928	0.101227	0.547416	0.974431	284.928	0.224629	0.199082	0.584287	284.928	0.3412	0.045641	0.161861	284.928	1.04457	5.86e-09
MINCR	138.547	-0.0918591	0.658827	1	138.547	-0.107494	0.588213	0.982206	138.547	0.110604	0.600374	0.868218	138.547	-0.0223336	0.909701	0.960155	138.547	1.1688	5.98e-09
SETD1A	617.013	0.267691	0.098245	1	617.013	0.262187	0.103651	0.772756	617.013	-0.0920225	0.574901	0.858231	617.013	0.555803	0.000606843	0.00707464	617.013	0.97077	6.04e-09
RSL1D1	1024.47	-0.0888236	0.49993	1	1024.47	0.0126406	0.922789	0.994776	1024.47	0.345384	0.00941285	0.159199	1024.47	0.473752	0.000279206	0.00385895	1024.47	0.775646	6.28e-09
FBXO28	1150.98	0.144005	0.139118	1	1150.98	0.251587	0.00809069	0.445999	1150.98	0.249006	0.011839	0.175693	1150.98	0.237095	0.012963	0.0678205	1150.98	0.565762	6.32e-09
SMCO4	305.141	-0.0542897	0.686879	1	305.141	-0.43388	0.000927506	0.169332	305.141	0.0935592	0.49969	0.82119	305.141	-0.490454	0.00024958	0.00353987	305.141	-0.77723	6.39e-09
DSC2	342.495	-0.0650385	0.577551	1	342.495	-0.0309621	0.782212	0.99209	342.495	-0.041476	0.729946	0.918035	342.495	-0.436516	0.000151536	0.00233988	342.495	-0.710069	6.48e-09
R3HDM2	97.4712	-0.256083	0.309124	1	97.4712	-0.435091	0.0828766	0.747938	97.4712	-0.506689	0.0550984	0.340365	97.4712	-1.37916	2.41e-07	1.28e-05	97.4712	-1.65762	6.99e-09
ZNF513	298.423	0.313067	0.00803831	1	298.423	0.12023	0.299167	0.924963	298.423	0.320925	0.0120013	0.175978	298.423	0.551098	2.67e-06	9.57e-05	298.423	0.703172	7.25e-09
TP53I11	1902.38	-0.169389	0.147696	1	1902.38	-0.253629	0.0296637	0.58309	1902.38	-0.0115533	0.922137	0.979482	1902.38	-0.370161	0.00163998	0.0148518	1902.38	-0.688229	7.46e-09
PAXIP1-AS1	339.991	-0.0822773	0.501441	1	339.991	-0.277643	0.0210639	0.544179	339.991	-0.00458968	0.971084	0.993239	339.991	0.167811	0.15243	0.357648	339.991	0.693389	7.61e-09
ZNF79	106.928	0.316443	0.267194	1	106.928	0.288255	0.305556	0.924963	106.928	0.22219	0.450337	0.788243	106.928	1.06345	9.83e-05	0.00168866	106.928	1.65579	7.93e-09
GDI2	740.028	-0.0418465	0.670749	1	740.028	0.124289	0.194224	0.864001	740.028	-0.0948813	0.349597	0.719515	740.028	-0.0847716	0.380443	0.618594	740.028	-0.572748	8.24e-09
C11orf71	216.006	0.133591	0.574145	1	216.006	-0.167951	0.468156	0.961004	216.006	-0.544716	0.0254728	0.247322	216.006	0.0528449	0.818817	0.91599	216.006	1.35109	9.29e-09
DDX46	958.496	-0.0431823	0.653467	1	958.496	0.143993	0.128035	0.809092	958.496	-0.254988	0.0104566	0.165844	958.496	0.337021	0.000489276	0.00607974	958.496	0.596219	9.61e-09
LOC100506473	126.828	0.344417	0.0815974	1	126.828	0.0885158	0.642913	0.986263	126.828	-0.000272582	0.998946	1	126.828	1.12285	1.96e-09	2.35e-07	126.828	1.10864	9.82e-09
OGT	1381.83	0.0222407	0.800833	1	1381.83	0.109394	0.2105	0.872288	1381.83	-0.318877	0.000436736	0.0336049	1381.83	-0.390927	7.79e-06	0.000230498	1381.83	-0.516228	9.89e-09
PRPS2	868.229	-0.113528	0.316007	1	868.229	-0.130447	0.241724	0.88838	868.229	-0.24886	0.0306418	0.266461	868.229	-0.266039	0.0181023	0.0854378	868.229	-0.680106	9.96e-09
CHST15	96.3906	-0.142211	0.5013	1	96.3906	-0.219676	0.281338	0.908344	96.3906	0.097627	0.661369	0.891211	96.3906	-0.658254	0.00247391	0.0202685	96.3906	-1.33705	9.97e-09
NKRF	597.341	0.164603	0.152149	1	597.341	0.326969	0.00374771	0.352623	597.341	0.00905512	0.938638	0.984581	597.341	0.438173	8.53e-05	0.00150549	597.341	0.668519	1e-08
SIK3	222.824	-0.0390738	0.777354	1	222.824	0.331066	0.0146827	0.503273	222.824	0.383075	0.00857864	0.152386	222.824	0.602299	9.64e-06	0.00027348	222.824	0.880647	1.1e-08
MICU1	1080.65	-0.0351319	0.693567	1	1080.65	0.0551582	0.529275	0.968638	1080.65	-0.172882	0.0610269	0.355259	1080.65	-0.235595	0.00694852	0.0435436	1080.65	-0.514025	1.11e-08
USPL1	135.247	0.100438	0.560498	1	135.247	-0.097669	0.562011	0.978072	135.247	0.966053	8.71e-08	9.02e-05	135.247	0.511817	0.00303229	0.0234792	135.247	1.09588	1.11e-08
PPARG	105.867	0.16105	0.441631	1	105.867	-0.347938	0.086033	0.754254	105.867	-0.396467	0.0771786	0.394721	105.867	-1.10171	1.86e-07	1.03e-05	105.867	-1.2669	1.16e-08
PBX3	1040.5	-0.136448	0.209088	1	1040.5	-0.0354712	0.741584	0.99209	1040.5	-0.194916	0.0794365	0.399832	1040.5	-0.310388	0.00431377	0.030522	1040.5	-0.634051	1.19e-08
HES1	776.058	0.180248	0.123893	1	776.058	0.47161	3.99e-05	0.0395298	776.058	0.0502058	0.66858	0.894529	776.058	-0.277289	0.0128754	0.0674462	776.058	-0.64673	1.23e-08
OTUD6B-AS1	465.639	-0.0709156	0.689347	1	465.639	0.210738	0.225666	0.879107	465.639	-0.212145	0.242508	0.631692	465.639	0.333224	0.0540605	0.18182	465.639	0.990588	1.24e-08
EP300	930.131	-0.0906696	0.551828	1	930.131	-0.00271941	0.985732	0.999254	930.131	-0.0565174	0.713707	0.911473	930.131	0.628024	4.11e-05	0.000851027	930.131	0.882469	1.29e-08
SRSF7	3724.86	0.157389	0.0326204	1	3724.86	0.136945	0.060983	0.704951	3724.86	0.0332628	0.655742	0.889358	3724.86	0.508464	3.68e-12	9.91e-10	3724.86	0.427007	1.3e-08
ZNF614	203.041	0.261053	0.258479	1	203.041	-0.0628665	0.782415	0.99209	203.041	0.252302	0.281806	0.665089	203.041	0.859925	0.000135991	0.00216365	203.041	1.32774	1.31e-08
TMEM263	281.039	0.0370408	0.769995	1	281.039	-0.157365	0.185941	0.85813	281.039	-0.298577	0.0274163	0.251851	281.039	-0.197787	0.101937	0.276529	281.039	-0.692005	1.32e-08
TMED3	414.637	-0.104407	0.402764	1	414.637	0.0519081	0.672206	0.987729	414.637	0.285519	0.0286121	0.258635	414.637	0.129154	0.289249	0.528907	414.637	-0.686979	1.32e-08
ALDH1L2	127.938	-0.147096	0.670666	1	127.938	-0.308405	0.365272	0.94012	127.938	-0.639921	0.0784785	0.397585	127.938	-1.60895	3.99e-06	0.000133888	127.938	-2.15129	1.33e-08
C1orf21	345.019	-0.0898872	0.585657	1	345.019	-0.0252459	0.876411	0.993238	345.019	-0.423921	0.0133786	0.183136	345.019	-0.542912	0.000972383	0.0100533	345.019	-0.962621	1.36e-08
PRELID1	1408.54	0.0740995	0.427718	1	1408.54	-0.0993713	0.28347	0.910962	1408.54	0.20049	0.0357453	0.282584	1408.54	0.447404	1.69e-06	6.51e-05	1408.54	0.547677	1.37e-08
SERPINE2	293.155	0.141334	0.343204	1	293.155	-0.149775	0.306906	0.924963	293.155	-0.187404	0.224249	0.613199	293.155	-0.519608	0.000484037	0.00602713	293.155	-0.887105	1.43e-08
SGMS1	143.657	0.277435	0.127813	1	143.657	-0.298441	0.0928954	0.760283	143.657	0.154206	0.423306	0.770916	143.657	-0.407743	0.0260821	0.110943	143.657	-1.07316	1.46e-08
VCL	613.661	-0.149735	0.156767	1	613.661	-0.254881	0.013565	0.489542	613.661	-0.200679	0.0687958	0.375059	613.661	-0.146487	0.165345	0.376528	613.661	-0.635782	1.46e-08
KDM4B	444.692	-0.0850658	0.453914	1	444.692	-0.140106	0.212438	0.87315	444.692	-0.0667568	0.570484	0.857042	444.692	-0.658873	1.39e-08	1.16e-06	444.692	-0.711765	1.5e-08
PALLD	572.275	0.111416	0.498581	1	572.275	0.148032	0.366633	0.94012	572.275	0.113888	0.496418	0.818742	572.275	-0.58621	0.000423761	0.00538779	572.275	-0.964326	1.52e-08
GPR180	307.619	-0.00507787	0.970394	1	307.619	0.0933462	0.476186	0.96253	307.619	-0.181859	0.207816	0.593413	307.619	-0.479531	0.000372506	0.00487919	307.619	-0.776207	1.53e-08
ERO1A	674.132	-0.038311	0.737789	1	674.132	0.00663568	0.953113	0.996049	674.132	0.00648382	0.955681	0.988514	674.132	-0.267869	0.0206077	0.0942825	674.132	-0.683751	1.55e-08
RANBP6	90.5802	0.0259371	0.910682	1	90.5802	0.325285	0.126498	0.80699	90.5802	0.124986	0.599801	0.867964	90.5802	0.814889	0.000110733	0.0018341	90.5802	1.29183	1.59e-08
SNRPC	1348.17	-0.133126	0.250382	1	1348.17	-0.11161	0.330797	0.934913	1348.17	0.150481	0.200529	0.58527	1348.17	0.469606	4.21e-05	0.000864769	1348.17	0.65747	1.6e-08
ZNF34	171.023	0.134997	0.520611	1	171.023	0.0146434	0.941503	0.99546	171.023	-0.0508333	0.80951	0.946885	171.023	1.48263	1.31e-15	1.12e-12	171.023	1.06661	1.61e-08
COMMD9	500.094	-0.146992	0.158876	1	500.094	-0.0107995	0.915871	0.993238	500.094	0.173811	0.112211	0.460325	500.094	0.663792	1.56e-10	2.83e-08	500.094	0.630325	1.65e-08
STAG2	2009.72	-0.00571666	0.939672	1	2009.72	0.0727974	0.324736	0.932315	2009.72	0.0575862	0.450561	0.788278	2009.72	-0.361902	1.15e-06	4.69e-05	2009.72	-0.428158	1.7e-08
RHBDD2	833.417	-0.00130833	0.991076	1	833.417	-0.0593601	0.611239	0.983789	833.417	0.105123	0.383294	0.740647	833.417	0.296449	0.0116237	0.0629786	833.417	0.672571	1.74e-08
SEC23A	262.373	0.0153939	0.934071	1	262.373	-0.0210359	0.906516	0.993238	262.373	-0.0372635	0.841933	0.957703	262.373	-0.219663	0.220114	0.449864	262.373	-1.02641	1.89e-08
DHCR7	933.919	-0.0584134	0.468786	1	933.919	-0.168252	0.0359015	0.61552	933.919	-0.00259055	0.975529	0.99388	933.919	-0.0833576	0.315571	0.557255	933.919	-0.505837	1.89e-08
RIN2	123.766	0.0378703	0.885582	1	123.766	0.157564	0.543622	0.974003	123.766	-0.621119	0.0202446	0.2238	123.766	-2.50383	7.38e-18	8.94e-15	123.766	-1.6106	1.9e-08
LINC02604	436.656	0.0677497	0.732735	1	436.656	-0.310786	0.115503	0.792509	436.656	0.0207378	0.917669	0.978705	436.656	0.0840186	0.669653	0.832254	436.656	1.14575	2.06e-08
TOM1L2	587.071	-0.125066	0.393655	1	587.071	-0.0346031	0.813203	0.99209	587.071	0.216129	0.15005	0.51654	587.071	-0.733089	1.1e-06	4.54e-05	587.071	-0.8721	2.12e-08
SLC35B1	440.325	0.0743319	0.57443	1	440.325	-0.0313689	0.81021	0.99209	440.325	0.10842	0.42894	0.774965	440.325	0.765508	6.32e-09	6.16e-07	440.325	0.770857	2.21e-08
STYXL1	215.753	0.0670697	0.653415	1	215.753	-0.153141	0.294237	0.917196	215.753	0.132419	0.391056	0.745423	215.753	-0.471591	0.00144304	0.0135411	215.753	-0.869447	2.22e-08
ZNF271P	1435.99	0.0135097	0.894433	1	1435.99	-0.0141143	0.888931	0.993238	1435.99	0.247516	0.0168414	0.20247	1435.99	0.319655	0.00165897	0.0149871	1435.99	0.580325	2.26e-08
BNIP3	1617.62	-0.0185441	0.885827	1	1617.62	-0.237708	0.0630269	0.710428	1617.62	-0.170264	0.189198	0.572294	1617.62	-0.783642	8.04e-10	1.06e-07	1617.62	-0.72034	2.28e-08
NKX2-5	331.563	0.17322	0.2097	1	331.563	0.0764773	0.575181	0.981131	331.563	0.532942	0.000179296	0.0217561	331.563	0.780893	1.09e-08	9.62e-07	331.563	0.80252	2.29e-08
LRRFIP1	2402.22	0.0299076	0.800285	1	2402.22	0.130343	0.268795	0.899985	2402.22	-0.075731	0.523674	0.834022	2402.22	-0.279258	0.0183706	0.0864997	2402.22	-0.670748	2.39e-08
TSHZ2	196.935	-0.337828	0.0297734	1	196.935	0.0412489	0.787611	0.99209	196.935	-0.381489	0.0170203	0.203952	196.935	-0.953847	3.62e-09	3.89e-07	196.935	-0.986864	2.4e-08
ZBED5-AS1	196.32	-0.0333431	0.886162	1	196.32	-0.205499	0.37359	0.94012	196.32	0.57873	0.0140194	0.186774	196.32	0.374429	0.101288	0.27563	196.32	1.31407	2.41e-08
ZNF768	379.034	-0.134036	0.404237	1	379.034	0.042027	0.790046	0.99209	379.034	0.444643	0.00616197	0.13102	379.034	0.634896	4.69e-05	0.000939787	379.034	0.875763	2.53e-08
RRM1	1040.75	-0.0453033	0.562836	1	1040.75	0.126113	0.0962468	0.760283	1040.75	-0.0938893	0.24754	0.63669	1040.75	-0.0443788	0.563967	0.764034	1040.75	-0.450811	2.64e-08
ZNF652	396.482	-0.206584	0.100585	1	396.482	-0.280568	0.0236436	0.548582	396.482	0.0128889	0.921808	0.979379	396.482	-0.744368	1.09e-08	9.62e-07	396.482	-0.735261	2.77e-08
PSRC1	738.82	-0.125842	0.2422	1	738.82	-0.121466	0.250784	0.894467	738.82	-0.342777	0.00233358	0.0826213	738.82	0.680279	1.71e-10	3.03e-08	738.82	0.599418	2.8e-08
ROR1	190.724	0.0447001	0.801461	1	190.724	0.0511908	0.768006	0.99209	190.724	0.102267	0.575224	0.858324	190.724	-0.506582	0.00365759	0.0269634	190.724	-0.997388	2.9e-08
EPHA7	166.777	-0.126549	0.479006	1	166.777	-0.350526	0.0416382	0.643186	166.777	-0.393252	0.036371	0.284363	166.777	-0.330413	0.068755	0.214505	166.777	-1.04306	2.91e-08
PPP4R3A	520.351	0.134919	0.282903	1	520.351	0.0646445	0.599051	0.982562	520.351	0.181988	0.151245	0.518253	520.351	0.484136	7.48e-05	0.00135045	520.351	0.700329	2.96e-08
RPP40	104.446	0.121778	0.594508	1	104.446	0.376569	0.0913031	0.759573	104.446	0.0822982	0.737294	0.920693	104.446	0.709908	0.00141208	0.0133669	104.446	1.33502	3.05e-08
PSMF1	3363.07	0.0515419	0.658432	1	3363.07	-0.0331729	0.775522	0.99209	3363.07	0.0141255	0.903952	0.974824	3363.07	0.412903	0.000399272	0.00512531	3363.07	0.650011	3.32e-08
TRAP1	2703.48	-0.0751157	0.392633	1	2703.48	-0.0901794	0.302622	0.924963	2703.48	0.135793	0.126397	0.484173	2703.48	-0.141742	0.105519	0.283166	2703.48	-0.495121	3.34e-08
NXF1	431.736	0.107672	0.34085	1	431.736	0.0769726	0.492651	0.964518	431.736	-0.0425366	0.719111	0.913476	431.736	0.520379	5.73e-06	0.000179754	431.736	0.667994	3.34e-08
MAX	1348.41	-0.00711657	0.929873	1	1348.41	0.132031	0.0990784	0.760283	1348.41	-0.0566069	0.500576	0.821293	1348.41	0.329983	5.41e-05	0.00105136	1348.41	0.474685	3.47e-08
PLAT	635.629	0.166931	0.231416	1	635.629	-0.0134195	0.921976	0.994428	635.629	-0.00565099	0.968081	0.99214	635.629	-0.697719	4.42e-07	2.12e-05	635.629	-0.77909	3.61e-08
HEXIM1	93.3083	-0.0297965	0.887047	1	93.3083	-0.151146	0.460375	0.961004	93.3083	0.546403	0.0132232	0.183136	93.3083	1.17889	4.81e-08	3.3e-06	93.3083	1.1837	3.68e-08
LOC101927610	48.9808	-0.529208	0.229134	1	48.9808	0.117449	0.783848	0.99209	48.9808	0.185222	0.678467	0.898629	48.9808	1.30389	0.00273307	0.0218135	48.9808	2.7183	3.87e-08
GTF2IP20	563.236	0.268596	0.0819401	1	563.236	0.113853	0.458861	0.961004	563.236	0.262953	0.0914446	0.422385	563.236	-0.114277	0.458661	0.685359	563.236	0.874304	3.93e-08
CHD8	555.712	-0.147072	0.219594	1	555.712	0.103871	0.383471	0.941267	555.712	0.111561	0.368617	0.730301	555.712	0.458668	0.000150564	0.00233415	555.712	0.696973	3.97e-08
SEC13	662.894	-0.000257675	0.998396	1	662.894	-0.186645	0.142491	0.823458	662.894	-0.168859	0.202933	0.587603	662.894	0.160424	0.207247	0.43366	662.894	-0.704549	4.09e-08
C7orf61	75.5634	0.350438	0.363111	1	75.5634	-0.494064	0.174079	0.852105	75.5634	0.416453	0.262992	0.648234	75.5634	1.01711	0.00368255	0.0270302	75.5634	1.90125	4.14e-08
CTSB	868.263	-0.166314	0.259591	1	868.263	-0.0333727	0.819834	0.99209	868.263	0.00848024	0.95477	0.988122	868.263	-0.252604	0.0866984	0.249185	868.263	-0.815464	4.29e-08
RRP7A	1195.52	-0.0956991	0.434079	1	1195.52	0.058071	0.633526	0.986217	1195.52	0.501043	4.9e-05	0.00986179	1195.52	0.213218	0.0810895	0.238538	1195.52	0.693347	4.37e-08
ZSCAN21	277.912	0.00587254	0.968429	1	277.912	0.360425	0.0114151	0.481339	277.912	0.0743968	0.620699	0.876809	277.912	0.679968	7.67e-07	3.37e-05	277.912	0.769129	4.45e-08
SHISA4	13.8538	0.33262	0.509927	1	13.8538	0.920614	0.0763349	0.737158	13.8538	0.258372	0.665634	0.893132	13.8538	1.52494	0.00372329	0.0272839	13.8538	4.05477	4.47e-08
SARNP	839.078	0.0233168	0.867705	1	839.078	0.384453	0.00532102	0.378353	839.078	0.324559	0.0214297	0.231531	839.078	0.598352	1.22e-05	0.000326229	839.078	0.751211	4.48e-08
G3BP1	3625.2	-0.0516719	0.433328	1	3625.2	-0.0202903	0.756073	0.99209	3625.2	-0.232618	0.000546368	0.0380816	3625.2	-0.139363	0.0349114	0.134837	3625.2	-0.368149	4.49e-08
SHISA5	1963.44	0.0253151	0.821285	1	1963.44	-0.0404362	0.717767	0.99209	1963.44	0.234033	0.0386675	0.291752	1963.44	0.192792	0.0842996	0.244443	1963.44	0.613624	4.59e-08
AKIRIN2	763.898	-0.0634472	0.575879	1	763.898	0.368101	0.00091828	0.169332	763.898	0.162868	0.15505	0.522763	763.898	0.441645	6.32e-05	0.00118178	763.898	0.615576	4.69e-08
GUSBP1	53.9068	0.351207	0.338598	1	53.9068	0.65478	0.0731718	0.730636	53.9068	0.54015	0.16069	0.52978	53.9068	1.29993	0.000447005	0.00564135	53.9068	2.37577	4.7e-08
GTF3C4	447.869	-0.194881	0.040005	1	447.869	0.0800528	0.38201	0.941267	447.869	0.251499	0.0120653	0.176749	447.869	0.488317	1.25e-07	7.42e-06	447.869	0.532835	4.9e-08
PAPSS1	561.703	-0.0764657	0.517337	1	561.703	-0.0665189	0.564203	0.978305	561.703	-0.131009	0.278468	0.662439	561.703	-0.073974	0.521642	0.733802	561.703	-0.660534	4.98e-08
TIMM21	257.165	-0.0358126	0.78591	1	257.165	0.0586985	0.643253	0.986263	257.165	-0.25245	0.0737214	0.387505	257.165	0.11806	0.351976	0.591406	257.165	0.74496	4.98e-08
CCNG1	1822.41	0.0346898	0.736738	1	1822.41	-0.0749205	0.462061	0.961004	1822.41	-0.154069	0.139486	0.502157	1822.41	-0.236226	0.0200526	0.0924417	1822.41	-0.559983	5e-08
GABARAPL1	224.904	0.207171	0.119896	1	224.904	0.0811789	0.503622	0.968194	224.904	-0.0420887	0.752693	0.925534	224.904	-0.290093	0.0107603	0.0594312	224.904	-0.619318	5.09e-08
SSBP1	1610.11	-0.034223	0.734117	1	1610.11	0.0186748	0.851281	0.992936	1610.11	0.0440174	0.666379	0.893583	1610.11	0.328242	0.00102527	0.0104367	1610.11	0.558848	5.32e-08
SEC11C	373.016	-0.116419	0.361442	1	373.016	-0.0227266	0.854673	0.993238	373.016	0.00532291	0.968249	0.99214	373.016	0.445664	0.000340399	0.00452391	373.016	0.71095	5.36e-08
SEPTIN6	1363.49	0.109877	0.194101	1	1363.49	-0.0455971	0.58528	0.981647	1363.49	0.0135681	0.874944	0.969048	1363.49	-0.123769	0.142349	0.343509	1363.49	-0.471055	5.49e-08
YIPF2	269.472	0.197465	0.167875	1	269.472	-0.125124	0.367337	0.94012	269.472	-0.0583256	0.696936	0.904818	269.472	-0.344163	0.0139789	0.0712483	269.472	-0.767856	5.58e-08
LOC101928000	1125.41	-0.166153	0.205734	1	1125.41	-0.00553169	0.965919	0.998141	1125.41	0.144667	0.273244	0.657491	1125.41	0.113187	0.380149	0.618302	1125.41	0.704653	5.68e-08
TGFBRAP1	219.963	0.0333947	0.81095	1	219.963	0.108153	0.431544	0.95062	219.963	0.0846893	0.571767	0.857403	219.963	0.223072	0.120797	0.310731	219.963	0.8428	5.8e-08
CDKN2AIP	115.073	0.29192	0.118297	1	115.073	0.30597	0.0756335	0.735074	115.073	0.316996	0.110275	0.456597	115.073	1.06073	4.41e-11	9.15e-09	115.073	0.89357	5.87e-08
GS1-124K5.11	151.537	-0.0564714	0.761787	1	151.537	0.277122	0.134984	0.814612	151.537	-0.142631	0.477235	0.805437	151.537	0.630814	0.000598476	0.00701651	151.537	1.03596	5.9e-08
EIF5A	990.506	-0.106825	0.364925	1	990.506	0.0921458	0.432142	0.951072	990.506	0.260554	0.029572	0.262341	990.506	0.446228	0.000176274	0.0026452	990.506	0.676035	6.09e-08
NUDT3	2970.19	-0.0142605	0.87299	1	2970.19	-0.125787	0.156772	0.837896	2970.19	0.0481088	0.593604	0.867304	2970.19	0.07612	0.393658	0.631853	2970.19	0.488916	6.11e-08
ERAL1	1036.31	0.0572262	0.553604	1	1036.31	0.042063	0.659842	0.986879	1036.31	0.139562	0.16031	0.529492	1036.31	0.387257	4.81e-05	0.000957614	1036.31	0.539141	6.12e-08
CLTC	2787.23	-0.0050996	0.949188	1	2787.23	-0.155919	0.0496205	0.682661	2787.23	-0.104769	0.19719	0.581801	2787.23	-0.0445648	0.57852	0.774712	2787.23	-0.444391	6.18e-08
GORASP2	1825.03	0.0118894	0.895899	1	1825.03	-0.0777947	0.387616	0.941267	1825.03	0.148692	0.108029	0.452097	1825.03	-0.0499758	0.578554	0.774712	1825.03	-0.492133	6.2e-08
ENPP1	138.731	-0.161672	0.357877	1	138.731	-0.0428623	0.798353	0.99209	138.731	-0.0234205	0.896788	0.972924	138.731	-0.561314	0.00104631	0.0105988	138.731	-1.02903	6.29e-08
LPXN	386.611	0.402141	0.0501171	1	386.611	0.578644	0.00443338	0.368733	386.611	0.405686	0.0480302	0.3235	386.611	0.545544	0.00684449	0.0430271	386.611	1.11012	6.33e-08
SCD5	107.311	-0.0426998	0.817908	1	107.311	-0.556416	0.00198127	0.26502	107.311	-0.322891	0.104176	0.446851	107.311	-0.422019	0.0223137	0.0994981	107.311	-1.17692	6.4e-08
MYO9A	258.247	-0.213505	0.167652	1	258.247	0.186226	0.220002	0.877892	258.247	-0.0488442	0.760317	0.92935	258.247	-0.23876	0.124529	0.316465	258.247	-0.900242	6.56e-08
NUP210	234.284	-0.14076	0.29779	1	234.284	-0.114369	0.395163	0.941395	234.284	-0.225916	0.114482	0.462581	234.284	-0.670032	4.07e-06	0.000135826	234.284	-0.93522	6.7e-08
CALU	2085.01	-0.0963452	0.518777	1	2085.01	0.367988	0.0134172	0.489542	2085.01	-0.156936	0.295095	0.676598	2085.01	-0.0976961	0.51291	0.728231	2085.01	-0.807049	6.73e-08
TMEM214	2154.72	-0.011583	0.91614	1	2154.72	0.00245117	0.982191	0.999254	2154.72	0.170803	0.124668	0.481906	2154.72	-0.249202	0.0240524	0.104889	2154.72	-0.600269	6.89e-08
ZNF76	128.285	0.0771635	0.645863	1	128.285	0.0240519	0.883186	0.993238	128.285	-0.377569	0.0325608	0.270874	128.285	-1.02981	2.15e-09	2.48e-07	128.285	-1.11118	6.99e-08
MTM1	33.1756	-0.0519409	0.886538	1	33.1756	0.0615909	0.864269	0.993238	33.1756	-0.532532	0.185309	0.567649	33.1756	-0.489142	0.209292	0.436451	33.1756	-2.17786	7.02e-08
STK39	456.865	-0.0688652	0.576467	1	456.865	-0.134125	0.265988	0.899985	456.865	-0.229493	0.0702637	0.379368	456.865	-0.612182	6.99e-07	3.1e-05	456.865	-0.704832	7.12e-08
CMTM4	731.331	-0.145165	0.140967	1	731.331	-0.209113	0.0325616	0.597699	731.331	-0.188747	0.0666512	0.370157	731.331	-0.982893	7.01e-22	1.45e-18	731.331	-0.567002	7.15e-08
NDUFC2	1417.34	-0.0797406	0.405097	1	1417.34	0.0448117	0.636228	0.986217	1417.34	0.00896252	0.927128	0.980805	1417.34	0.246918	0.00945106	0.0546086	1417.34	0.522639	7.16e-08
RPS19BP1	329.224	0.0139394	0.893831	1	329.224	0.0764293	0.447051	0.956333	329.224	0.32548	0.00346639	0.10243	329.224	0.552139	5.12e-08	3.46e-06	329.224	0.570934	7.51e-08
ACTN1	1934.9	-0.221026	0.00195265	0.920465	1934.9	-0.0421564	0.552208	0.975959	1934.9	-0.0905633	0.216539	0.603861	1934.9	-0.366579	6.69e-07	2.99e-05	1934.9	-0.435208	7.8e-08
DDA1	728.618	0.105544	0.323955	1	728.618	-0.00289982	0.978163	0.999254	728.618	0.303895	0.0056078	0.125553	728.618	0.435104	5.85e-05	0.00112408	728.618	0.600184	7.8e-08
PYURF	1030.84	0.0738114	0.437132	1	1030.84	-0.0182775	0.844333	0.992693	1030.84	-0.044411	0.652763	0.888552	1030.84	0.389295	2.65e-05	0.000604484	1030.84	0.50908	7.87e-08
NXT2	252.212	0.0540978	0.758389	1	252.212	-0.00301375	0.985761	0.999254	252.212	-0.0628938	0.724535	0.91635	252.212	0.691354	3.66e-05	0.000778022	252.212	0.930588	8.19e-08
IL17RD	63.4101	0.00633419	0.980071	1	63.4101	-0.113582	0.641688	0.986263	63.4101	-0.0443834	0.863156	0.964488	63.4101	-2.13458	3.38e-14	1.58e-11	63.4101	-1.561	8.2e-08
PIGY	1031.09	0.0744183	0.433697	1	1031.09	-0.0186013	0.841728	0.992693	1031.09	-0.0444132	0.652965	0.888552	1031.09	0.389703	2.63e-05	0.000601766	1031.09	0.508612	8.26e-08
FOXRED2	3948.48	-0.080601	0.210584	1	3948.48	-0.0550645	0.391504	0.941267	3948.48	-0.0718694	0.272367	0.656908	3948.48	0.0239176	0.714793	0.86108	3948.48	0.377535	8.52e-08
HPRT1	5818.14	-0.116686	0.224872	1	5818.14	-0.118106	0.217968	0.877503	5818.14	-0.0224336	0.816425	0.949401	5818.14	-0.165406	0.0847533	0.24544	5818.14	-0.518648	8.84e-08
MARK4	1176.76	0.00441207	0.971535	1	1176.76	-0.182143	0.139397	0.82238	1176.76	-0.303523	0.0158747	0.195826	1176.76	-0.711983	1.71e-08	1.37e-06	1176.76	-0.677737	9.1e-08
XPOT	514.745	0.0418096	0.727213	1	514.745	0.0521071	0.659629	0.986879	514.745	-0.0855156	0.488332	0.812911	514.745	-0.12907	0.289792	0.529166	514.745	-0.711445	9.59e-08
MIR4453HG	100.15	0.0972913	0.674539	1	100.15	-0.0444116	0.839044	0.992693	100.15	-0.467958	0.0598898	0.353567	100.15	0.936263	3.77e-06	0.000127313	100.15	1.13439	9.89e-08
TMEM185B	291.196	0.397891	0.017169	1	291.196	0.0255743	0.87515	0.993238	291.196	-0.122584	0.472516	0.802219	291.196	0.347207	0.035705	0.136739	291.196	0.918732	1.01e-07
AMZ2	1615.34	-0.0902206	0.260425	1	1615.34	-0.0912206	0.242312	0.889333	1615.34	0.126984	0.119277	0.471854	1615.34	0.426784	2.74e-08	2.06e-06	1615.34	0.415432	1.03e-07
IRS4	6244.92	-0.000370026	0.997088	1	6244.92	-0.182571	0.0710468	0.728273	6244.92	-0.377591	0.000204901	0.0230781	6244.92	-0.980762	4.71e-22	1.14e-18	6244.92	-0.558835	1.04e-07
LOC101928180	38.3913	0.703755	0.34399	1	38.3913	0.48407	0.457788	0.961004	38.3913	0.487579	0.494377	0.817632	38.3913	2.41093	1.19e-05	0.000319682	38.3913	2.8407	1.04e-07
SOGA3	475.317	0.228568	0.136386	1	475.317	-0.110611	0.463012	0.961004	475.317	-0.113839	0.468503	0.800288	475.317	0.761292	2.55e-07	1.33e-05	475.317	0.807216	1.09e-07
SETD4	135.943	0.250415	0.155661	1	135.943	0.100669	0.555525	0.976023	135.943	0.136495	0.458753	0.794031	135.943	0.334434	0.0507825	0.174183	135.943	1.00579	1.1e-07
ZNF654	169.354	-0.265052	0.19563	1	169.354	0.0394976	0.840883	0.992693	169.354	0.773788	0.000153135	0.0195097	169.354	1.1831	8.41e-10	1.1e-07	169.354	1.05404	1.1e-07
ZIC3	226.218	0.0971163	0.486532	1	226.218	-0.248916	0.0627888	0.710428	226.218	-0.0471838	0.745689	0.923503	226.218	-0.313429	0.0225097	0.100049	226.218	-0.862592	1.12e-07
C8orf33	946.25	0.108413	0.288534	1	946.25	0.0592199	0.556196	0.976023	946.25	0.230547	0.027061	0.250733	946.25	0.518616	3.28e-07	1.63e-05	946.25	0.559442	1.14e-07
ASS1	476.806	-0.0133638	0.934435	1	476.806	0.0859835	0.589492	0.982269	476.806	-0.26404	0.10716	0.450351	476.806	-0.504005	0.00137918	0.0131889	476.806	-0.844192	1.15e-07
EPB41L4A-AS1	922.317	0.170126	0.283941	1	922.317	0.221103	0.155084	0.837738	922.317	0.353024	0.0258659	0.248552	922.317	0.800069	1.53e-07	8.63e-06	922.317	0.802815	1.15e-07
LOC107984798	7.50147	0.398074	0.764848	1	7.50147	1.12539	0.334184	NA	7.50147	-0.150159	0.903834	0.974824	7.50147	3.94483	0.00180349	0.0159838	7.50147	7.94104	1.15e-07
CFL1	16329.9	-0.0661373	0.523136	1	16329.9	-0.0755218	0.465835	0.961004	16329.9	0.282961	0.00637896	0.133161	16329.9	0.102786	0.321323	0.563031	16329.9	0.548485	1.29e-07
WDR77	1069.54	0.0901734	0.345807	1	1069.54	0.0034163	0.971164	0.998143	1069.54	0.031842	0.744979	0.923497	1069.54	0.168095	0.0821843	0.240833	1069.54	0.591661	1.3e-07
CD101	239.229	0.180318	0.145233	1	239.229	0.0547456	0.650074	0.986879	239.229	0.326884	0.010696	0.167972	239.229	0.613137	1.34e-06	5.36e-05	239.229	0.78797	1.3e-07
TCEA2	550.462	-0.262702	0.077007	1	550.462	0.0723515	0.624531	0.986217	550.462	0.102032	0.50002	0.821284	550.462	0.562668	0.000141736	0.00223789	550.462	0.801024	1.32e-07
TFAP2A	1114.98	-0.0860658	0.357732	1	1114.98	-0.154488	0.0946881	0.760283	1114.98	-0.222974	0.0201827	0.223433	1114.98	-0.167144	0.0725976	0.222245	1114.98	-0.513115	1.37e-07
DCAF4L1	11.5935	2.35169	0.00323985	1	11.5935	0.588267	0.457015	0.961004	11.5935	1.00146	0.166715	0.539281	11.5935	2.79908	2.07e-06	7.74e-05	11.5935	3.94542	1.37e-07
RHOT1	869.848	-0.0789728	0.618163	1	869.848	-0.166767	0.285088	0.912902	869.848	0.0750499	0.636794	0.882896	869.848	-0.656781	2.6e-05	0.000595795	869.848	-0.829607	1.39e-07
POLD2	499.331	-0.00525599	0.957497	1	499.331	-0.0170475	0.859629	0.993238	499.331	0.0784104	0.441441	0.782398	499.331	0.0504477	0.606961	0.7933	499.331	0.568252	1.39e-07
PRKXP1	65.1882	0.917599	0.0185063	1	65.1882	-0.179423	0.638607	0.986263	65.1882	0.0841807	0.832471	0.954477	65.1882	0.371173	0.358068	0.596274	65.1882	2.36628	1.44e-07
TPCN1	214.922	-0.154755	0.382683	1	214.922	0.0249877	0.887738	0.993238	214.922	0.2958	0.104219	0.446851	214.922	-0.538299	0.00277624	0.022037	214.922	-1.00944	1.46e-07
NUCB2	447.037	0.0576368	0.720491	1	447.037	0.042563	0.787257	0.99209	447.037	-0.294142	0.0711479	0.382251	447.037	-0.141167	0.370854	0.609493	447.037	-0.832087	1.46e-07
ZNF704	153.314	-0.00613311	0.970332	1	153.314	-0.409705	0.0110697	0.480876	153.314	-0.256234	0.141142	0.504432	153.314	-0.581488	0.000659509	0.00754333	153.314	-1.03187	1.56e-07
SURF4	825.959	-0.053124	0.51117	1	825.959	0.12375	0.119787	0.798261	825.959	-0.172934	0.0412014	0.300795	825.959	-0.0241015	0.769043	0.892476	825.959	-0.448993	1.56e-07
FGF18	14.8622	0.258861	0.680764	1	14.8622	0.83302	0.17746	0.853717	14.8622	1.78158	0.00999465	0.162385	14.8622	4.22628	3.28e-10	4.96e-08	14.8622	3.09218	1.57e-07
EMC10	872.255	-0.181807	0.0371492	1	872.255	-0.163875	0.0570208	0.69925	872.255	0.185987	0.0396208	0.295069	872.255	0.401193	7.86e-06	0.000231185	872.255	0.530447	1.59e-07
DARS1	4548.96	-0.179118	0.0520332	1	4548.96	0.199039	0.029991	0.586954	4548.96	-0.0597058	0.519512	0.832065	4548.96	-0.192839	0.0357903	0.136885	4548.96	-0.485516	1.6e-07
METTL3	285.354	0.084577	0.524171	1	285.354	0.0189214	0.882662	0.993238	285.354	-0.191599	0.175345	0.554165	285.354	-0.570349	2.73e-05	0.000621186	285.354	-0.783104	1.63e-07
SCRN1	1248.22	-0.0496567	0.555359	1	1248.22	-0.11828	0.152845	0.833686	1248.22	0.0510213	0.557617	0.851727	1248.22	-0.249721	0.00271975	0.0217431	1248.22	-0.446908	1.64e-07
CPSF7	2460.48	0.00546205	0.950938	1	2460.48	0.155754	0.0774049	0.739361	2460.48	-0.120357	0.180655	0.561361	2460.48	0.346962	9.09e-05	0.00158173	2460.48	0.476064	1.64e-07
GEN1	271.121	-0.15123	0.349981	1	271.121	0.031736	0.840809	0.992693	271.121	0.0808205	0.630008	0.880149	271.121	-0.0299686	0.849107	0.931088	271.121	0.866925	1.71e-07
ARMCX3	396.488	0.0989013	0.484564	1	396.488	0.173987	0.20803	0.869583	396.488	0.229782	0.114042	0.462581	396.488	0.11079	0.422667	0.656244	396.488	-0.730364	1.82e-07
TRAM1	1175.96	-0.0639568	0.523602	1	1175.96	0.0316887	0.747745	0.99209	1175.96	-0.168898	0.100045	0.439388	1175.96	0.103101	0.296717	0.536559	1175.96	-0.521244	1.83e-07
FAM89A	717.344	-0.00274694	0.981025	1	717.344	0.0203298	0.858179	0.993238	717.344	-0.0094555	0.9364	0.983879	717.344	-0.790265	9.25e-12	2.44e-09	717.344	-0.617698	1.87e-07
ELP5	889.764	-0.078568	0.553452	1	889.764	0.0734131	0.575793	0.981577	889.764	0.0127987	0.924534	0.980505	889.764	0.561583	2.15e-05	0.000511857	889.764	0.693846	1.88e-07
B3GALT6	2339.9	0.0389758	0.818005	1	2339.9	-0.0365158	0.828958	0.992423	2339.9	0.19053	0.262442	0.648033	2339.9	0.149784	0.375242	0.613625	2339.9	0.884604	1.89e-07
KIAA1958	889.604	-0.139888	0.319054	1	889.604	-0.113324	0.415879	0.945119	889.604	-0.278593	0.0522688	0.333386	889.604	-0.727358	2.51e-07	1.31e-05	889.604	-0.739243	1.9e-07
MRPL48	1525.5	0.0767196	0.534864	1	1525.5	0.0891254	0.466264	0.961004	1525.5	-0.177091	0.155383	0.52326	1525.5	0.517647	2.07e-05	0.000497258	1525.5	0.633153	1.9e-07
RPL7L1	2665.85	-0.0819863	0.517919	1	2665.85	-0.0668789	0.596556	0.982562	2665.85	0.357868	0.00499536	0.120874	2665.85	0.285953	0.024164	0.105186	2665.85	0.667825	1.92e-07
ZNF425	127.426	0.0029853	0.991169	1	127.426	0.337111	0.200288	0.864244	127.426	0.194292	0.479886	0.807062	127.426	0.322684	0.226358	0.457616	127.426	1.42422	1.93e-07
TOMM20	4992.12	0.0340063	0.656426	1	4992.12	-0.114057	0.133991	0.813528	4992.12	-0.0109587	0.887145	0.970912	4992.12	-0.0942055	0.215573	0.444614	4992.12	-0.398688	1.95e-07
CREBBP	300.713	-0.0203183	0.897466	1	300.713	-0.158961	0.311078	0.924963	300.713	0.272177	0.0938006	0.427926	300.713	0.99819	6.6e-10	9.17e-08	300.713	0.88285	1.95e-07
EPOR	81.4788	0.0195993	0.937637	1	81.4788	-0.045963	0.849618	0.992693	81.4788	-0.273843	0.293715	0.675427	81.4788	-0.66354	0.0080022	0.0485351	81.4788	-1.40711	2e-07
ZFHX4	447.505	-0.0385351	0.786221	1	447.505	-0.184499	0.190277	0.863502	447.505	-0.0872208	0.551378	0.848936	447.505	0.0538751	0.711028	0.858268	447.505	0.814752	2.04e-07
IFITM2	2379.56	-0.00600295	0.961158	1	2379.56	-0.0430637	0.726311	0.99209	2379.56	0.0675268	0.586445	0.86432	2379.56	0.160901	0.191151	0.412089	2379.56	0.644943	2.07e-07
WIPI1	73.0397	-0.132722	0.664022	1	73.0397	-0.160886	0.583877	0.981647	73.0397	-0.0684621	0.831048	0.954409	73.0397	-1.36727	1.11e-05	0.000304776	73.0397	-1.53664	2.08e-07
WDR27	393.344	0.250617	0.0488494	1	393.344	0.182059	0.150144	0.831673	393.344	-0.451612	0.000596026	0.0394214	393.344	-0.67365	1.12e-07	6.75e-06	393.344	-0.701567	2.09e-07
ELP2	701.142	-0.0808707	0.387072	1	701.142	0.0436042	0.632777	0.986217	701.142	0.0208732	0.828769	0.954088	701.142	-0.165441	0.0713244	0.220022	701.142	-0.500775	2.1e-07
COPRS	1812.07	0.022075	0.85907	1	1812.07	-0.0501755	0.685019	0.987729	1812.07	0.268765	0.0316644	0.269139	1812.07	0.260186	0.0359481	0.13738	1812.07	0.654543	2.1e-07
ENO2	411.246	0.0283534	0.861752	1	411.246	0.000237455	0.998827	0.999344	411.246	-0.233748	0.155906	0.523832	411.246	-0.592614	0.00023274	0.0033374	411.246	-0.853567	2.13e-07
CLPTM1L	661.257	-0.131767	0.237467	1	661.257	0.0558934	0.612658	0.983834	661.257	-0.0811898	0.479831	0.807057	661.257	0.390262	0.00052002	0.00635307	661.257	0.632353	2.15e-07
TUBA1A	718.992	0.0252319	0.803268	1	718.992	-0.0898327	0.36257	0.94012	718.992	-0.0754148	0.470132	0.80033	718.992	-0.136796	0.164733	0.375801	718.992	-0.530798	2.16e-07
RAD18	282.539	-0.248433	0.046435	1	282.539	0.0968143	0.415846	0.945119	282.539	-0.0718911	0.585129	0.863527	282.539	0.00511058	0.965769	0.984731	282.539	-0.639194	2.17e-07
ZFP41	175.127	0.27638	0.223897	1	175.127	-0.2218	0.325913	0.933373	175.127	0.215318	0.360164	0.726089	175.127	0.302024	0.184349	0.403896	175.127	1.24595	2.19e-07
CDCA3	316.042	-0.0670228	0.690347	1	316.042	-0.287046	0.0854655	0.754173	316.042	0.192081	0.269718	0.65426	316.042	0.860443	3.73e-07	1.82e-05	316.042	0.914927	2.2e-07
MRPL9	686.402	-0.0614367	0.519679	1	686.402	-0.0601609	0.517301	0.968306	686.402	0.0559687	0.569068	0.856744	686.402	0.419128	5.96e-06	0.000185765	686.402	0.502022	2.21e-07
KMT2B	718.086	0.0729208	0.59906	1	718.086	-0.0540715	0.697087	0.988849	718.086	0.0162991	0.908463	0.976129	718.086	0.189797	0.173825	0.389058	718.086	0.739722	2.22e-07
SHLD3	139.25	-0.228009	0.390906	1	139.25	0.492231	0.0556985	0.698454	139.25	0.668822	0.0133877	0.183136	139.25	1.53061	1.37e-09	1.72e-07	139.25	1.32114	2.22e-07
WDCP	163.23	0.14589	0.318096	1	163.23	0.299887	0.0317999	0.593527	163.23	0.0834426	0.590553	0.86594	163.23	0.347933	0.0127071	0.0669507	163.23	0.764243	2.27e-07
APLP2	5203.73	0.0601034	0.570803	1	5203.73	0.0377027	0.721781	0.99209	5203.73	-0.266239	0.0123744	0.178943	5203.73	-0.175621	0.0975874	0.269302	5203.73	-0.554057	2.29e-07
MDGA2	79.8616	-0.191991	0.461324	1	79.8616	-0.135665	0.584969	0.981647	79.8616	-0.0463552	0.861282	0.963617	79.8616	-0.670765	0.0102875	0.0575766	79.8616	-1.58029	2.33e-07
PPP3CB	388.276	-0.251242	0.0514965	1	388.276	-0.13237	0.293121	0.917097	388.276	-0.183434	0.17129	0.547697	388.276	-0.587607	5.01e-06	0.000161008	388.276	-0.696289	2.34e-07
NUDT19	2074.11	0.143203	0.119808	1	2074.11	0.0415002	0.649045	0.986879	2074.11	0.205711	0.0263931	0.250395	2074.11	0.372925	4.66e-05	0.000935207	2074.11	0.487531	2.38e-07
ZNF84	53.9676	-0.699756	0.0278094	1	53.9676	0.525612	0.0858214	0.754254	53.9676	0.359532	0.279655	0.662954	53.9676	1.16983	6.51e-05	0.00121023	53.9676	1.5839	2.39e-07
PLA2G12A	404.195	-0.131169	0.209394	1	404.195	-0.0645496	0.52821	0.968638	404.195	-0.123453	0.266656	0.651952	404.195	-0.17583	0.0915978	0.258761	404.195	-0.571517	2.4e-07
SEPTIN9	591.84	0.00124611	0.991075	1	591.84	-0.116455	0.288367	0.913805	591.84	-0.131117	0.251089	0.638946	591.84	-0.518538	4.15e-06	0.000137442	591.84	-0.608601	2.42e-07
C9orf152	50.2503	-0.298834	0.688064	1	50.2503	0.607273	0.404178	0.943368	50.2503	2.17707	0.0034373	0.101764	50.2503	2.55789	0.000196048	0.00289705	50.2503	3.54742	2.48e-07
RPS28	239.637	0.0864266	0.58754	1	239.637	0.100553	0.51154	0.968306	239.637	-0.32775	0.0475261	0.322713	239.637	0.307764	0.0410202	0.15066	239.637	0.800299	2.49e-07
ZNF37A	265.597	-0.113597	0.50071	1	265.597	0.0282424	0.865327	0.993238	265.597	0.0854013	0.624223	0.877907	265.597	0.19909	0.243667	0.478433	265.597	0.955583	2.69e-07
CTSD	288.967	-0.29703	0.0151463	1	288.967	-0.111677	0.357468	0.94012	288.967	-0.259087	0.0440897	0.309537	288.967	0.0154993	0.902405	0.956485	288.967	0.753046	2.72e-07
FZD3	249.497	0.159454	0.350572	1	249.497	-0.134294	0.421036	0.947136	249.497	0.154117	0.380072	0.738621	249.497	-0.214019	0.210568	0.4384	249.497	-0.916157	2.73e-07
DHX9	2822.71	-0.0524863	0.555883	1	2822.71	-0.0993126	0.261781	0.899985	2822.71	-0.199841	0.0269638	0.250733	2822.71	0.521961	4.28e-09	4.42e-07	2822.71	0.472418	2.73e-07
PEBP1	1183.78	-0.116587	0.166353	1	1183.78	-0.15783	0.0588415	0.69925	1183.78	0.247528	0.00427157	0.114077	1183.78	-0.0528927	0.533469	0.742827	1183.78	0.459585	2.74e-07
GCNT1	44.6705	0.137676	0.64945	1	44.6705	-0.323711	0.284103	0.911759	44.6705	-0.546823	0.112201	0.460325	44.6705	-1.00316	0.00165977	0.0149871	44.6705	-1.75295	2.75e-07
UTP14A	385.693	0.241283	0.128992	1	385.693	0.345432	0.0273731	0.57783	385.693	0.0073595	0.963921	0.990543	385.693	0.649067	4.16e-05	0.000856917	385.693	0.879434	2.78e-07
APP	1100.17	-0.0279065	0.806917	1	1100.17	-0.10263	0.362209	0.94012	1100.17	0.135591	0.23894	0.627379	1100.17	-0.10997	0.329095	0.570935	1100.17	-0.592766	2.82e-07
HOXA5	2397.61	-0.129878	0.130136	1	2397.61	0.0763135	0.37196	0.94012	2397.61	0.0470232	0.590735	0.865962	2397.61	0.340166	7.83e-05	0.00139958	2397.61	0.447613	2.85e-07
PDLIM7	224.852	-0.305357	0.0507408	1	224.852	-0.0229113	0.881528	0.993238	224.852	0.210521	0.189625	0.572395	224.852	0.196748	0.217494	0.446673	224.852	0.914691	2.9e-07
THAP9-AS1	278.385	0.409221	0.00729362	1	278.385	0.604795	2.2e-05	0.0247674	278.385	0.159401	0.298305	0.679633	278.385	0.839785	4.57e-10	6.77e-08	278.385	0.706939	2.91e-07
MIB1	574.95	-0.240242	0.105023	1	574.95	-0.181648	0.211767	0.87315	574.95	-0.253284	0.0935477	0.427525	574.95	-0.735226	5.65e-07	2.61e-05	574.95	-0.762081	2.92e-07
CTNNBIP1	140.077	-0.100489	0.562485	1	140.077	-0.187699	0.265661	0.899985	140.077	-0.129933	0.48436	0.810739	140.077	-0.474031	0.00552664	0.0364081	140.077	-0.984876	2.93e-07
NT5DC2	2342.39	-0.0783392	0.393265	1	2342.39	-0.173238	0.0583935	0.69925	2342.39	-0.00460151	0.960495	0.989663	2342.39	-0.0562404	0.543831	0.750351	2342.39	-0.496345	2.93e-07
GASAL1	84.3781	0.150873	0.579399	1	84.3781	0.32392	0.224654	0.878205	84.3781	0.163665	0.569267	0.856875	84.3781	0.239324	0.363653	0.601642	84.3781	1.41727	2.95e-07
MTAP	455.778	-0.0924144	0.493719	1	455.778	-0.00867124	0.948146	0.996049	455.778	-0.423848	0.0023714	0.082974	455.778	-0.678105	5.26e-07	2.44e-05	455.778	-0.741854	2.99e-07
UMPS	455.812	0.0844413	0.382837	1	455.812	0.131226	0.162269	0.839905	455.812	0.284072	0.00518111	0.122947	455.812	0.572564	3.92e-09	4.16e-07	455.812	0.563616	3.05e-07
BCCIP	727.42	0.0169289	0.881196	1	727.42	0.0211766	0.848719	0.992693	727.42	-0.115006	0.324327	0.699558	727.42	0.439605	7.09e-05	0.00128725	727.42	0.582758	3.06e-07
ZNF22	210.478	-0.136966	0.34991	1	210.478	-0.0044511	0.974192	0.9983	210.478	0.25791	0.0923125	0.425006	210.478	0.472036	0.000637996	0.00737274	210.478	0.73931	3.06e-07
DOCK9	88.0908	0.233802	0.322108	1	88.0908	-0.0464812	0.839305	0.992693	88.0908	-0.64135	0.00981932	0.160824	88.0908	-1.31656	9.51e-08	5.88e-06	88.0908	-1.38153	3.11e-07
TOE1	274.688	0.0250733	0.882986	1	274.688	0.224244	0.183749	0.85813	274.688	0.836951	2.14e-06	0.000971015	274.688	0.639996	0.000205743	0.00301882	274.688	0.956713	3.15e-07
TUBB6	1257.24	-0.0825645	0.337259	1	1257.24	-0.161812	0.0557013	0.698454	1257.24	-0.126567	0.15325	0.520265	1257.24	0.174293	0.0416893	0.152278	1257.24	-0.450595	3.16e-07
DCAF10	474.846	0.0993455	0.332483	1	474.846	0.0278023	0.782311	0.99209	474.846	-0.210831	0.0487283	0.325756	474.846	-0.513953	4.7e-07	2.22e-05	474.846	-0.540028	3.19e-07
LINC02321	41.9384	-0.81029	0.0656872	1	41.9384	0.847914	0.0380766	0.636652	41.9384	1.72072	5.13e-05	0.00995861	41.9384	1.52657	9.54e-05	0.00164902	41.9384	2.05537	3.22e-07
ST6GAL1	90.372	0.0983371	0.730018	1	90.372	-0.153782	0.583565	0.981647	90.372	-0.45272	0.126805	0.484236	90.372	-2.09436	1.38e-11	3.35e-09	90.372	-1.68958	3.39e-07
FBXL6	97.5266	-0.0315005	0.890488	1	97.5266	-0.136392	0.552841	0.975959	97.5266	0.14542	0.552725	0.849501	97.5266	0.917375	0.000134027	0.00214178	97.5266	1.35361	3.41e-07
TMEM126B	536.836	0.0339773	0.788732	1	536.836	0.184476	0.134163	0.813528	536.836	0.150596	0.249634	0.63798	536.836	0.421786	0.000537972	0.00649937	536.836	0.649623	3.45e-07
ATP1B2	235.313	-0.210359	0.229426	1	235.313	-0.335903	0.0503666	0.682802	235.313	0.144412	0.408951	0.759327	235.313	-0.577927	0.000907359	0.0095762	235.313	-0.894671	3.47e-07
MRPL15	1224.04	0.0427988	0.651148	1	1224.04	-0.0596989	0.521045	0.968306	1224.04	0.218385	0.0235013	0.24	1224.04	0.537452	9.74e-09	8.79e-07	1224.04	0.50025	3.76e-07
METTL26	601.132	-0.00790029	0.945125	1	601.132	0.117794	0.299354	0.924963	601.132	0.0735588	0.530306	0.837227	601.132	0.515255	7.81e-06	0.000230498	601.132	0.627334	3.8e-07
TRMT11	468.469	0.0789455	0.582975	1	468.469	-0.164689	0.240718	0.88838	468.469	-0.339196	0.0229513	0.237716	468.469	-0.337189	0.0147637	0.0742067	468.469	-0.723564	3.87e-07
C1orf131	225.197	0.136238	0.42692	1	225.197	0.166339	0.319066	0.930842	225.197	0.165831	0.347071	0.717128	225.197	0.895751	1.33e-07	7.8e-06	225.197	0.95407	3.98e-07
PGS1	1744.75	0.0345325	0.759329	1	1744.75	-0.015294	0.891595	0.993238	1744.75	0.0582214	0.608501	0.8721	1744.75	-0.00974511	0.930921	0.969203	1744.75	0.582626	3.99e-07
HEATR5A	209.132	0.125551	0.353916	1	209.132	-0.028	0.830244	0.992423	209.132	0.0137606	0.924389	0.980493	209.132	-0.329449	0.0184808	0.0867862	209.132	-0.794148	4.03e-07
ARHGEF6	86.9766	0.395288	0.136905	1	86.9766	-0.0185634	0.941662	0.99546	86.9766	-0.38117	0.160486	0.529492	86.9766	-0.682804	0.00864254	0.0511997	86.9766	-1.40154	4.1e-07
CSNK1D	1382.19	0.0618664	0.474294	1	1382.19	-0.0543656	0.527237	0.968382	1382.19	0.199659	0.0243567	0.242056	1382.19	0.285395	0.000836618	0.00902876	1382.19	0.444559	4.12e-07
LDLR	290.676	-0.35892	0.0166317	1	290.676	-0.249048	0.0936052	0.760283	290.676	-0.0617256	0.691762	0.903155	290.676	-0.622258	5.49e-05	0.00106474	290.676	-0.811604	4.16e-07
FAM216A	828.019	-0.00822308	0.945795	1	828.019	-0.019873	0.865335	0.993238	828.019	-0.0406152	0.73816	0.920693	828.019	-0.228361	0.0511591	0.175062	828.019	-0.611221	4.19e-07
PTGR2	299.643	-0.13906	0.483781	1	299.643	0.0962902	0.622505	0.986217	299.643	-0.586939	0.00379009	0.108289	299.643	-0.571332	0.00353717	0.026351	299.643	-1.03118	4.23e-07
AKR7A2	661.298	-0.153557	0.0828483	1	661.298	-0.106824	0.213762	0.873948	661.298	-0.101461	0.269953	0.654266	661.298	0.101861	0.24617	0.481231	661.298	-0.47279	4.36e-07
SH2D5	61.9986	0.0601365	0.821709	1	61.9986	-0.759135	0.00395271	0.358396	61.9986	-0.573513	0.054648	0.339835	61.9986	-0.8453	0.0044224	0.0310788	61.9986	-1.76776	4.38e-07
C1QTNF6	81.4421	-0.45808	0.225158	1	81.4421	-0.147209	0.692308	0.988849	81.4421	-0.524039	0.171252	0.54769	81.4421	-1.46303	9.06e-05	0.00157998	81.4421	-1.961	4.44e-07
HAUS2	192.457	0.332711	0.0306145	1	192.457	0.330788	0.0251107	0.561664	192.457	0.336475	0.0385858	0.291419	192.457	0.724675	4.81e-07	2.27e-05	192.457	0.759109	4.46e-07
TRA2A	348.793	0.0319804	0.834278	1	348.793	0.201797	0.179179	0.855072	348.793	0.0838412	0.591366	0.866101	348.793	0.782127	4.02e-07	1.95e-05	348.793	0.828977	4.46e-07
PUM1	4620.16	0.132432	0.139994	1	4620.16	0.114423	0.200658	0.864244	4620.16	-0.17027	0.0595316	0.352696	4620.16	0.129208	0.147878	0.350685	4620.16	0.452074	4.61e-07
RFC1	1118.4	-0.0119779	0.920071	1	1118.4	-0.0662562	0.57382	0.980637	1118.4	-0.301518	0.0129438	0.182387	1118.4	-0.425537	0.000326799	0.00439545	1118.4	-0.609906	4.71e-07
ZNF629	234.29	-0.0707926	0.597399	1	234.29	-0.298412	0.023549	0.548582	234.29	0.322713	0.0224323	0.236228	234.29	0.0818816	0.555833	0.75898	234.29	0.765492	4.71e-07
LRATD2	5166.13	0.071798	0.544341	1	5166.13	0.0283877	0.810156	0.99209	5166.13	-0.438726	0.000223339	0.0233459	5166.13	-0.298873	0.0115962	0.0628768	5166.13	-0.608424	4.79e-07
FAHD1	492.85	0.0661852	0.677375	1	492.85	0.254575	0.103929	0.772756	492.85	0.280895	0.0802147	0.401439	492.85	0.577864	0.00022062	0.00318561	492.85	0.812774	4.81e-07
KLHDC10	537.914	0.0553658	0.664047	1	537.914	0.00111368	0.992946	0.999254	537.914	-0.0240419	0.854078	0.961474	537.914	-0.730517	1.86e-08	1.46e-06	537.914	-0.661584	5.06e-07
PPP2CA	1751.58	0.0175541	0.897115	1	1751.58	0.0658153	0.625925	0.986217	1751.58	0.199762	0.144567	0.508734	1751.58	0.523469	0.000106644	0.00178627	1751.58	0.680561	5.06e-07
SLC17A5	185.791	0.0391548	0.830025	1	185.791	-0.057085	0.746454	0.99209	185.791	-0.181213	0.338511	0.710319	185.791	-0.513563	0.0051044	0.0343259	185.791	-0.918172	5.15e-07
NOC2L	3459.71	0.0290841	0.785816	1	3459.71	-0.127501	0.232817	0.88413	3459.71	0.395247	0.000238162	0.0238823	3459.71	0.276818	0.00996201	0.0566594	3459.71	0.549811	5.23e-07
SNRK	137.966	-0.0731442	0.681412	1	137.966	0.321388	0.0588548	0.69925	137.966	0.07847	0.671669	0.896333	137.966	0.463645	0.00599543	0.0387065	137.966	0.894703	5.33e-07
MUL1	231.867	0.237255	0.213095	1	231.867	0.00822802	0.964685	0.998078	231.867	0.471494	0.015654	0.194676	231.867	0.700681	0.000199291	0.00293899	231.867	0.957787	5.35e-07
CCZ1P-OR7E38P	990.355	-0.0852415	0.599573	1	990.355	0.101923	0.526403	0.968306	990.355	-0.238586	0.144964	0.509128	990.355	0.0355178	0.82638	0.921117	990.355	0.829777	5.47e-07
TMEM31	226.243	-0.331858	0.356255	1	226.243	0.19868	0.57292	0.980013	226.243	0.318174	0.372044	0.733875	226.243	-0.856951	0.0131013	0.0681897	226.243	-1.70846	5.48e-07
OLMALINC	875.661	0.0958777	0.376656	1	875.661	-0.367123	0.000594935	0.143528	875.661	0.209958	0.0551671	0.340365	875.661	-0.668553	4.62e-10	6.78e-08	875.661	-0.549585	5.48e-07
MRPL20	1558.51	-0.0409186	0.705662	1	1558.51	0.138227	0.198444	0.86414	1558.51	0.282992	0.01004	0.162385	1558.51	0.448136	3.35e-05	0.000724672	1558.51	0.553912	5.49e-07
NXN	471.558	-0.108886	0.376706	1	471.558	-0.149015	0.221281	0.878205	471.558	-0.0243799	0.847163	0.958788	471.558	-0.325366	0.0082354	0.0494808	471.558	-0.66923	5.68e-07
RNF167	812.539	0.0126423	0.899418	1	812.539	0.112739	0.253669	0.89573	812.539	0.180003	0.0764209	0.393648	812.539	0.276103	0.00563125	0.0368848	812.539	0.515279	5.72e-07
ATP6V0D2	21.0814	-0.55152	0.234996	1	21.0814	1.316	0.00685021	0.428395	21.0814	-0.150284	0.787819	0.938558	21.0814	-0.570275	0.191054	0.41208	21.0814	-2.69805	5.89e-07
RNF185	1067.56	-0.068391	0.574997	1	1067.56	0.114004	0.346165	0.939661	1067.56	0.26141	0.035297	0.280829	1067.56	0.494174	4.79e-05	0.000955226	1067.56	0.613397	5.89e-07
PRTG	1090.74	-0.161307	0.332041	1	1090.74	-0.127003	0.442432	0.955636	1090.74	-0.375115	0.025523	0.247322	1090.74	-0.231575	0.165007	0.375982	1090.74	-0.845595	6e-07
KIAA0408	444.109	0.271584	0.0866662	1	444.109	-0.0925645	0.551789	0.975959	444.109	-0.135685	0.402205	0.753498	444.109	0.726843	1.92e-06	7.26e-05	444.109	0.783537	6.03e-07
NDRG1	217.056	-0.137666	0.490468	1	217.056	-0.173639	0.369943	0.94012	217.056	-0.480688	0.0154916	0.194506	217.056	-1.08507	1.47e-08	1.22e-06	217.056	-1.0122	6.14e-07
SLC25A51	268.533	-0.249373	0.162435	1	268.533	0.0694906	0.694541	0.988849	268.533	-0.295104	0.108991	0.454047	268.533	0.0828955	0.644232	0.816281	268.533	0.962733	6.23e-07
ATG4C	1128.28	0.0489921	0.659036	1	1128.28	0.0605178	0.57743	0.981647	1128.28	-0.123677	0.269952	0.654266	1128.28	-0.194148	0.0725923	0.222245	1128.28	-0.549548	6.25e-07
NIP7	273.897	-0.110976	0.370741	1	273.897	0.359097	0.00253899	0.298276	273.897	0.233742	0.0731738	0.38609	273.897	0.243166	0.0483592	0.168255	273.897	0.701909	6.27e-07
DDIT4	900.52	0.086031	0.640546	1	900.52	-0.452798	0.0136563	0.489542	900.52	-0.604369	0.00109239	0.0540992	900.52	-1.05068	1.07e-08	9.51e-07	900.52	-0.93915	6.29e-07
FAM204A	729.227	0.0634192	0.51165	1	729.227	0.0457488	0.624565	0.986217	729.227	-0.0351551	0.726337	0.917331	729.227	0.425769	3.37e-06	0.000116185	729.227	0.470586	6.57e-07
FAM53C	923.696	0.3243	0.001286	0.818135	923.696	0.190581	0.0529551	0.687896	923.696	0.115871	0.259841	0.646194	923.696	0.383591	0.000117462	0.0019193	923.696	0.505002	6.6e-07
PGK1	3325.82	-0.00346335	0.974292	1	3325.82	-0.161638	0.130679	0.811619	3325.82	-0.0756768	0.483926	0.810471	3325.82	-0.133623	0.211694	0.43986	3325.82	-0.538392	6.61e-07
AARS1	1205.23	-0.0365511	0.749164	1	1205.23	-0.126739	0.264604	0.899985	1205.23	0.0038413	0.973556	0.99367	1205.23	-0.502247	1.14e-05	0.000310561	1205.23	-0.575304	6.63e-07
WDFY2	234.307	-0.32933	0.0703906	1	234.307	0.0517072	0.773873	0.99209	234.307	0.0767127	0.680895	0.899569	234.307	-0.710657	0.000119372	0.00194613	234.307	-0.949068	6.66e-07
SMG8	337.978	0.126032	0.485343	1	337.978	0.166321	0.348723	0.94012	337.978	0.180708	0.331866	0.705585	337.978	0.592125	0.000838434	0.00903086	337.978	0.892902	6.72e-07
DIAPH3	341.462	0.0988991	0.381737	1	341.462	-0.0591048	0.587317	0.981647	341.462	-0.36668	0.00221801	0.0799872	341.462	-0.153725	0.164259	0.375318	341.462	-0.575616	6.87e-07
BLOC1S4	504.257	0.0956325	0.458965	1	504.257	0.0912016	0.471751	0.961004	504.257	0.306637	0.01984	0.222171	504.257	0.28067	0.0268397	0.112983	504.257	0.657889	6.93e-07
ZNF268	61.9666	0.403037	0.102456	1	61.9666	0.266521	0.265408	0.899985	61.9666	-0.297278	0.269702	0.65426	61.9666	1.33694	9.89e-09	8.87e-07	61.9666	1.28498	7.06e-07
ESYT2	1414.97	0.0661023	0.60553	1	1414.97	-0.232539	0.0679306	0.721244	1414.97	-0.143034	0.270173	0.654517	1414.97	-0.296504	0.0209615	0.0952415	1414.97	-0.649306	7.11e-07
GGACT	50.3104	0.00328561	0.991484	1	50.3104	-0.235542	0.416806	0.945119	50.3104	0.661737	0.0311586	0.268644	50.3104	0.235141	0.416712	0.651647	50.3104	1.63597	7.11e-07
FEZ1	109.126	-0.298363	0.157545	1	109.126	0.011636	0.954261	0.996049	109.126	-0.264523	0.212256	0.599092	109.126	-0.79846	6e-05	0.0011445	109.126	-1.0999	7.15e-07
MAP4	910.645	-0.184198	0.0486317	1	910.645	-0.135726	0.143741	0.823458	910.645	-0.0932682	0.333736	0.707001	910.645	-0.286393	0.00249006	0.0203778	910.645	-0.508606	7.16e-07
ZRANB2	1904.44	0.0168021	0.830321	1	1904.44	0.197197	0.0107503	0.47933	1904.44	-0.150048	0.0619735	0.358675	1904.44	-0.166945	0.0321482	0.127801	1904.44	-0.397489	7.17e-07
MRPS11	770.739	0.0909664	0.564214	1	770.739	0.049535	0.753037	0.99209	770.739	0.18696	0.243207	0.632509	770.739	0.535579	0.000720815	0.00805427	770.739	0.796545	7.2e-07
SNHG10	386.004	-0.262547	0.0255702	1	386.004	-0.0605754	0.600916	0.982562	386.004	0.454284	0.000253511	0.0247819	386.004	0.587087	4.15e-07	2e-05	386.004	0.612098	7.25e-07
MTG2	625.299	-0.0207159	0.873329	1	625.299	0.253341	0.05049	0.682802	625.299	0.154989	0.243671	0.632704	625.299	0.431416	0.000923484	0.00969021	625.299	0.667081	7.3e-07
ZCCHC24	354.345	-0.197909	0.22244	1	354.345	-0.0213005	0.894259	0.993238	354.345	-0.605694	0.000312505	0.027996	354.345	-1.14826	1.34e-11	3.31e-09	354.345	-0.855956	7.33e-07
TMEM249	95.952	-0.0852541	0.700355	1	95.952	-0.117492	0.598314	0.982562	95.952	0.256774	0.280876	0.664382	95.952	1.00132	2.03e-05	0.000490328	95.952	1.29879	7.47e-07
AMN1	130.508	-0.21429	0.275566	1	130.508	0.11631	0.540314	0.973942	130.508	-0.202041	0.331557	0.705364	130.508	-0.363998	0.0499358	0.171917	130.508	-0.96884	7.59e-07
GFER	130.413	0.251912	0.175898	1	130.413	0.102597	0.570016	0.979131	130.413	0.245744	0.20363	0.587603	130.413	0.349631	0.0536825	0.181052	130.413	0.951885	7.63e-07
ILF3	2797	0.000522575	0.994484	1	2797	-0.184845	0.0141475	0.494605	2797	0.123466	0.1085	0.453428	2797	0.151056	0.0466478	0.164188	2797	0.388445	7.68e-07
PAPSS2	358.219	-0.101717	0.489769	1	358.219	-0.411255	0.00417818	0.367234	358.219	-0.127355	0.40166	0.753341	358.219	-0.634385	1.26e-05	0.000333347	358.219	-0.752599	7.83e-07
HSD17B4	394.568	-0.124835	0.254906	1	394.568	0.0104663	0.920249	0.993914	394.568	-0.299391	0.00878566	0.15403	394.568	-0.261632	0.0139391	0.0710955	394.568	-0.563883	7.94e-07
NEAT1	2297.63	-0.150473	0.527714	1	2297.63	0.105293	0.658624	0.986879	2297.63	-0.289883	0.225009	0.613996	2297.63	-0.600583	0.011803	0.0635088	2297.63	-1.17773	8e-07
EZH1	573.702	0.239019	0.123797	1	573.702	-0.252939	0.102532	0.770413	573.702	-0.0338214	0.830131	0.954276	573.702	-0.880456	2.13e-08	1.64e-06	573.702	-0.785435	8.04e-07
MAVS	820.666	-0.0613175	0.589321	1	820.666	-0.00889334	0.937604	0.99546	820.666	-0.0900816	0.440896	0.782373	820.666	-0.726721	1.02e-09	1.32e-07	820.666	-0.608963	8.08e-07
OSBPL9	501.254	-0.0163221	0.884847	1	501.254	0.00219846	0.983848	0.999254	501.254	-0.050872	0.661158	0.891196	501.254	-0.116851	0.285611	0.524764	501.254	-0.556663	8.24e-07
CIRBP	1427.62	-0.0493747	0.60808	1	1427.62	-0.123468	0.19837	0.86414	1427.62	0.168961	0.0867886	0.413536	1427.62	0.216265	0.0262796	0.111554	1427.62	0.495947	8.4e-07
BCLAF1	3008.37	-0.00640728	0.942881	1	3008.37	0.039718	0.654899	0.986879	3008.37	0.0543544	0.548331	0.846936	3008.37	0.609714	9.42e-12	2.44e-09	3008.37	0.450878	8.44e-07
SETD2	239.575	-0.00797316	0.958879	1	239.575	-0.124352	0.410451	0.944969	239.575	-0.393445	0.0164	0.199144	239.575	0.217942	0.151607	0.356409	239.575	0.797209	8.67e-07
NME1	2349.36	-0.043425	0.670393	1	2349.36	-0.0515531	0.610798	0.983642	2349.36	0.128369	0.211871	0.598726	2349.36	0.560102	3.43e-08	2.45e-06	2349.36	0.512878	8.69e-07
AGO2	1283.73	-0.194688	0.241485	1	1283.73	0.199757	0.228478	0.882374	1283.73	-0.165086	0.324715	0.699812	1283.73	-0.488972	0.00344017	0.0258607	1283.73	-0.83535	8.71e-07
ZNF358	217.799	-0.0322656	0.84203	1	217.799	0.056518	0.725674	0.99209	217.799	-0.11232	0.500662	0.821293	217.799	-0.53175	0.00149209	0.0139059	217.799	-0.885709	8.87e-07
ALDH18A1	230.113	0.0370877	0.798871	1	230.113	0.0190753	0.892708	0.993238	230.113	0.0240135	0.875444	0.969123	230.113	-0.171417	0.240804	0.475128	230.113	-0.748674	8.9e-07
EBF4	135.332	-0.0445075	0.830219	1	135.332	0.0232683	0.909627	0.993238	135.332	-0.355587	0.092034	0.42435	135.332	-1.08831	8.32e-08	5.23e-06	135.332	-1.01657	8.92e-07
SRPRB	360.791	-0.00864892	0.936772	1	360.791	0.215011	0.0410796	0.643088	360.791	0.456217	6.64e-05	0.0112255	360.791	0.821214	6.3e-15	3.98e-12	360.791	0.54921	9.03e-07
SLC9A7	256.492	0.160894	0.23536	1	256.492	-0.225945	0.0826841	0.747938	256.492	0.0629878	0.651331	0.888204	256.492	-0.559177	3.61e-05	0.000770289	256.492	-0.685446	9.27e-07
POLR2E	1665.25	-0.0408768	0.680188	1	1665.25	-0.105222	0.2863	0.913805	1665.25	0.147807	0.142789	0.506994	1665.25	0.403503	5.03e-05	0.00099442	1665.25	0.502319	9.33e-07
HUS1	571.244	0.0256415	0.808224	1	571.244	0.459214	7.04e-06	0.0113871	571.244	0.184857	0.0882095	0.41632	571.244	0.584744	8.31e-09	7.74e-07	571.244	0.522577	9.39e-07
RIPK4	542.861	0.156748	0.063805	1	542.861	0.0821331	0.308947	0.924963	542.861	0.0490573	0.570072	0.857042	542.861	-0.415859	2.21e-07	1.18e-05	542.861	-0.446151	9.42e-07
DUSP12	293.751	0.223916	0.109432	1	293.751	0.261156	0.0514651	0.685694	293.751	0.532373	0.000173546	0.0214082	293.751	0.56079	2.35e-05	0.00054948	293.751	0.679382	9.42e-07
AURKB	5237.67	0.0363029	0.668128	1	5237.67	0.112108	0.185104	0.85813	5237.67	-0.0964229	0.25801	0.644766	5237.67	0.145927	0.0849086	0.245694	5237.67	0.417703	9.73e-07
SNX10	727.484	0.172929	0.178037	1	727.484	-0.10914	0.385173	0.941267	727.484	-0.0276445	0.832251	0.954477	727.484	-0.954138	1.34e-13	5.11e-11	727.484	-0.631638	9.82e-07
ZHX3	260.466	-0.0810555	0.659092	1	260.466	-0.209355	0.251992	0.894957	260.466	0.199174	0.297087	0.678363	260.466	-0.644141	0.000807964	0.00878479	260.466	-1.02017	9.98e-07
LINC01144	80.6527	-0.24888	0.467105	1	80.6527	-0.471079	0.170514	0.848334	80.6527	0.1402	0.684017	0.900913	80.6527	0.341586	0.301019	0.541566	80.6527	1.68872	1.02e-06
ITGB4	39.8903	0.659471	0.0846194	1	39.8903	0.470271	0.194	0.864001	39.8903	-0.0376701	0.918438	0.978976	39.8903	0.548119	0.121136	0.311163	39.8903	1.84436	1.02e-06
DOCK11	206.163	0.0998159	0.652706	1	206.163	-0.028529	0.894746	0.993238	206.163	-0.214602	0.342825	0.713617	206.163	-0.764389	0.000453027	0.00570803	206.163	-1.1187	1.04e-06
GOLGB1	709.283	-0.0121319	0.914858	1	709.283	-0.0839736	0.451082	0.95925	709.283	-0.213203	0.0682781	0.374149	709.283	-0.211308	0.0621175	0.200071	709.283	-0.567009	1.04e-06
IAH1	374.294	-0.0231166	0.853142	1	374.294	0.14742	0.220218	0.877892	374.294	-0.279119	0.0328742	0.272514	374.294	-0.422313	0.000415887	0.00530393	374.294	-0.593852	1.06e-06
ZNF576	250.12	0.201953	0.217823	1	250.12	0.0622574	0.701679	0.991288	250.12	0.409858	0.0149671	0.191942	250.12	0.264727	0.109981	0.291636	250.12	0.84539	1.07e-06
HS2ST1	220.43	0.0386336	0.823657	1	220.43	-0.0693032	0.67972	0.987729	220.43	-0.261531	0.156602	0.524146	220.43	-0.963115	4e-08	2.83e-06	220.43	-0.902276	1.08e-06
DDB1	1104.15	-0.22973	0.0053052	1	1104.15	-0.134383	0.0989076	0.760283	1104.15	0.0988078	0.248417	0.637599	1104.15	-0.185846	0.0264946	0.112008	1104.15	-0.433944	1.08e-06
LOC105370687	71.1744	0.479992	0.0948134	1	71.1744	0.387879	0.169117	0.848334	71.1744	0.236928	0.423088	0.770916	71.1744	0.59714	0.0322091	0.127833	71.1744	1.4453	1.11e-06
ARFGAP1	107.434	0.0727908	0.694783	1	107.434	0.027423	0.882677	0.993238	107.434	-0.238608	0.231953	0.621196	107.434	-0.301045	0.115565	0.301618	107.434	-0.973113	1.14e-06
GIGYF1	726.156	-0.0703155	0.64487	1	726.156	-0.233994	0.125481	0.80699	726.156	0.104172	0.502144	0.822772	726.156	0.0126187	0.935006	0.970408	726.156	0.772046	1.14e-06
MANF	229.193	-0.0206327	0.90842	1	229.193	0.0479787	0.784057	0.99209	229.193	0.206055	0.265269	0.650037	229.193	0.0128568	0.943437	0.974267	229.193	-0.884011	1.15e-06
ADCY1	124.557	-0.0906904	0.612719	1	124.557	-0.123327	0.474775	0.962416	124.557	-0.585142	0.00241429	0.0837619	124.557	-0.968185	2.22e-07	1.19e-05	124.557	-0.982667	1.17e-06
H2BC21	27.9836	0.355842	0.409338	1	27.9836	0.307184	0.442113	0.955636	27.9836	-0.29449	0.525407	0.834755	27.9836	0.667526	0.0624969	0.200847	27.9836	1.75276	1.17e-06
CYB5D1	356.065	-0.0486483	0.659095	1	356.065	0.078185	0.469293	0.961004	356.065	-0.00597702	0.958908	0.989334	356.065	0.239628	0.0333425	0.131275	356.065	0.627365	1.2e-06
PRMT5	365.691	-0.0568105	0.628849	1	365.691	0.0903908	0.423486	0.948274	365.691	0.14458	0.227376	0.617096	365.691	0.72685	2.32e-10	3.79e-08	365.691	0.598944	1.21e-06
HTRA3	53.9469	0.215849	0.416056	1	53.9469	0.169154	0.520034	0.968306	53.9469	-0.705248	0.0143252	0.188054	53.9469	-0.594679	0.0292536	0.120005	53.9469	-1.67893	1.22e-06
CPSF6	553.837	0.0774748	0.419001	1	553.837	0.0290545	0.754538	0.99209	553.837	-0.144515	0.150393	0.516929	553.837	0.333929	0.000340198	0.00452391	553.837	0.481015	1.22e-06
RHBDF1	1089.65	0.0500907	0.722138	1	1089.65	-0.0239405	0.864213	0.993238	1089.65	-0.142625	0.315649	0.691783	1089.65	-0.694451	7.05e-07	3.12e-05	1089.65	-0.68748	1.24e-06
MPST	1160.96	0.0637675	0.6078	1	1160.96	-0.109692	0.37397	0.940493	1160.96	0.164218	0.190905	0.574156	1160.96	-0.584346	2.7e-06	9.65e-05	1160.96	-0.615084	1.26e-06
LATS1	836.815	0.222655	0.0436787	1	836.815	0.266275	0.0150692	0.503907	836.815	-0.0518929	0.648189	0.88626	836.815	0.329708	0.0026691	0.0214443	836.815	0.546833	1.29e-06
DPYSL5	573.823	-0.0310446	0.83027	1	573.823	-0.299102	0.0382126	0.637225	573.823	-0.0533558	0.720089	0.914208	573.823	-0.83192	3.27e-08	2.36e-06	573.823	-0.770623	1.31e-06
CSTF2T	179.771	0.142442	0.449702	1	179.771	0.250449	0.177854	0.853717	179.771	0.250079	0.213371	0.600286	179.771	1.15808	2.14e-10	3.62e-08	179.771	0.923902	1.31e-06
PDXK	496.27	-0.152208	0.145389	1	496.27	-0.0107424	0.91683	0.993238	496.27	0.190611	0.0748335	0.390033	496.27	-0.118775	0.258614	0.494162	496.27	-0.544114	1.32e-06
DDX55	745.65	0.109429	0.374524	1	745.65	0.136914	0.263253	0.899985	745.65	0.356088	0.00436115	0.114481	745.65	0.378892	0.00207631	0.0178465	745.65	0.62688	1.32e-06
SNHG9	171.704	-0.114669	0.688417	1	171.704	0.29737	0.294331	0.917196	171.704	-0.0423973	0.884861	0.970569	171.704	1.1055	0.000101974	0.00173416	171.704	1.38033	1.32e-06
SYP	96.6836	-0.435166	0.0675487	1	96.6836	0.186966	0.421757	0.947136	96.6836	-0.0260207	0.915861	0.977981	96.6836	0.198471	0.408806	0.644269	96.6836	1.40018	1.35e-06
NPR2	8.47628	-0.0889658	0.922339	1	8.47628	0.0465172	0.952065	NA	8.47628	-0.100933	0.90458	0.974824	8.47628	1.42706	0.0300304	0.122111	8.47628	4.0503	1.39e-06
DNTTIP1	1318.62	0.0837046	0.467279	1	1318.62	-0.0105338	0.926681	0.994928	1318.62	0.301169	0.00984042	0.161	1318.62	0.387328	0.00075593	0.00834395	1318.62	0.565652	1.42e-06
TIGAR	504.878	0.0957617	0.389523	1	504.878	-0.0178491	0.867939	0.993238	504.878	-0.182668	0.113818	0.46237	504.878	0.560561	2.14e-07	1.16e-05	504.878	0.549734	1.44e-06
NUP133	514.75	-0.0415754	0.681945	1	514.75	0.000893053	0.992689	0.999254	514.75	0.0655076	0.5289	0.836482	514.75	-0.293448	0.00331042	0.0251415	514.75	-0.511812	1.45e-06
MARCHF6	1199.62	0.00766159	0.905664	1	1199.62	-0.0991723	0.117665	0.794825	1199.62	-0.208149	0.00217385	0.0791293	1199.62	-0.188153	0.0034018	0.02563	1199.62	-0.328903	1.46e-06
SERBP1	6274.95	0.0492815	0.36968	1	6274.95	-0.0768328	0.157456	0.837896	6274.95	-0.0158807	0.775356	0.934662	6274.95	0.0156619	0.773298	0.895028	6274.95	-0.266778	1.46e-06
PYCARD-AS1	46.2118	0.452473	0.283619	1	46.2118	1.07431	0.0100264	0.467701	46.2118	1.75638	1.72e-05	0.00469258	46.2118	2.83281	3.25e-13	1.12e-10	46.2118	1.86084	1.46e-06
C1orf43	7562.54	0.0905722	0.253572	1	7562.54	-0.0458603	0.561363	0.977548	7562.54	-0.113586	0.154191	0.521338	7562.54	-0.143245	0.0694045	0.215978	7562.54	-0.38103	1.49e-06
TRAPPC2L	367.149	-0.198115	0.172641	1	367.149	-0.0894985	0.529068	0.968638	367.149	0.310405	0.0350385	0.280434	367.149	0.435575	0.00252338	0.0206156	367.149	0.75234	1.52e-06
MMACHC	668.371	0.141755	0.355876	1	668.371	0.172362	0.258694	0.898552	668.371	0.190767	0.220898	0.608869	668.371	0.488454	0.00144285	0.0135411	668.371	0.764907	1.54e-06
GART	2586.2	0.0369232	0.679984	1	2586.2	0.170195	0.0554883	0.698454	2586.2	-0.0954984	0.291019	0.67329	2586.2	-0.268046	0.00281383	0.0222503	2586.2	-0.44404	1.56e-06
BNIP3L	356.835	-0.0959309	0.637634	1	356.835	0.0346254	0.862932	0.993238	356.835	-0.522448	0.0110658	0.170293	356.835	-0.499984	0.01214	0.0647616	356.835	-0.963059	1.6e-06
HOXD4	157.735	-0.278846	0.275002	1	157.735	-0.381026	0.132489	0.81278	157.735	0.505822	0.0515753	0.332077	157.735	0.0549947	0.829295	0.922909	157.735	1.27808	1.62e-06
CUL7	1295.24	-0.0221974	0.895252	1	1295.24	-0.259901	0.122331	0.80582	1295.24	0.160296	0.343963	0.714354	1295.24	-0.401876	0.0170006	0.0818804	1295.24	-0.80553	1.64e-06
SELENOM	151.598	-0.0783618	0.680876	1	151.598	-0.118032	0.521263	0.968306	151.598	-0.0672952	0.731336	0.918093	151.598	-0.00566059	0.975708	0.989054	151.598	-0.909996	1.66e-06
IMP3	1696.77	0.0900391	0.373425	1	1696.77	0.034875	0.728408	0.99209	1696.77	0.0872571	0.396599	0.749968	1696.77	0.254695	0.0116449	0.0630464	1696.77	0.493545	1.66e-06
NEPRO	364.054	0.135539	0.220368	1	364.054	0.245623	0.0187713	0.532205	364.054	-0.0957712	0.402711	0.753776	364.054	0.605843	4.71e-09	4.77e-07	364.054	0.542975	1.67e-06
LOC101929440	11.5426	0.24441	0.719386	1	11.5426	0.75076	0.267258	0.899985	11.5426	1.35269	0.0798163	0.400706	11.5426	1.66115	0.0129125	0.0676159	11.5426	4.18267	1.7e-06
STAM-AS1	66.685	-0.444691	0.175537	1	66.685	0.262452	0.418991	0.946099	66.685	-0.213104	0.53465	0.83972	66.685	0.976047	0.00228423	0.0191133	66.685	1.50125	1.72e-06
CCDC124	512.133	-0.16273	0.132943	1	512.133	-0.138035	0.198086	0.86414	512.133	0.403041	0.000296002	0.0270369	512.133	0.292388	0.00723629	0.0449399	512.133	0.549434	1.73e-06
CNKSR1	45.0218	0.0624052	0.871672	1	45.0218	-0.28788	0.452672	0.95943	45.0218	0.386282	0.329204	0.702881	45.0218	1.47508	0.000141502	0.00223699	45.0218	2.06765	1.77e-06
APC2	11.1126	0.187973	0.781629	1	11.1126	1.44285	0.0586394	0.69925	11.1126	-0.185269	0.82129	0.951712	11.1126	4.14949	3.08e-08	2.24e-06	11.1126	3.52316	1.77e-06
HOOK3	620.052	-0.175666	0.0993452	1	620.052	0.268422	0.0103999	0.473074	620.052	0.141021	0.196243	0.581249	620.052	-0.377445	0.000539777	0.00650689	620.052	-0.535997	1.81e-06
MEAK7	97.7562	0.231765	0.314979	1	97.7562	0.135478	0.546247	0.974368	97.7562	-0.119167	0.629996	0.880149	97.7562	-0.311035	0.19125	0.41212	97.7562	-1.27903	1.83e-06
CMPK1	331.539	-0.113244	0.375477	1	331.539	-0.00505092	0.967589	0.998141	331.539	-0.184612	0.170213	0.546164	331.539	-0.17523	0.174389	0.389578	331.539	-0.622242	1.83e-06
C10orf95	77.6753	0.358795	0.322486	1	77.6753	-0.292093	0.404356	0.943368	77.6753	0.210058	0.554769	0.850098	77.6753	0.0254661	0.942393	0.973923	77.6753	1.78756	1.84e-06
ZNF689	968.279	-0.0118082	0.920517	1	968.279	0.261557	0.0263776	0.568439	968.279	0.322577	0.00726847	0.141394	968.279	0.778593	3.61e-11	7.71e-09	968.279	0.575299	1.86e-06
SNHG5	1288.77	0.153947	0.192323	1	1288.77	0.142091	0.222979	0.878205	1288.77	-0.0423874	0.721988	0.915423	1288.77	0.244993	0.0342626	0.133513	1288.77	0.555247	1.99e-06
EMC6	1230.92	0.0597712	0.567181	1	1230.92	0.117509	0.253096	0.895355	1230.92	0.257016	0.0148396	0.191412	1230.92	0.270165	0.0083298	0.0498758	1230.92	0.493954	2.03e-06
PMEPA1	206.441	-0.0199271	0.908765	1	206.441	0.0887996	0.602736	0.982562	206.441	-0.0448501	0.801342	0.943611	206.441	-0.10667	0.536651	0.744901	206.441	-0.840596	2.07e-06
MRAS	441.392	0.0354397	0.803773	1	441.392	-0.295153	0.0358984	0.61552	441.392	-0.0619935	0.670895	0.895878	441.392	-0.615882	1.89e-05	0.000463463	441.392	-0.723455	2.14e-06
ATP2B1-AS1	28.5338	0.714028	0.137238	1	28.5338	-0.206556	0.655621	0.986879	28.5338	-0.0926939	0.848789	0.959192	28.5338	0.676943	0.112533	0.296215	28.5338	2.14685	2.15e-06
RAB30-DT	248.261	-0.00830767	0.96636	1	248.261	0.149066	0.440699	0.954506	248.261	-0.0483174	0.810943	0.947563	248.261	0.387702	0.0458016	0.162351	248.261	0.947896	2.25e-06
DCAKD	277.626	-0.216791	0.278382	1	277.626	-0.105676	0.596554	0.982562	277.626	-0.187443	0.356589	0.723523	277.626	-0.663082	0.000997158	0.0102005	277.626	-0.979282	2.3e-06
MIS12	280.341	-0.211743	0.16564	1	280.341	0.0266434	0.856378	0.993238	280.341	0.0183239	0.907899	0.976129	280.341	0.640588	1.44e-05	0.000372557	280.341	0.71283	2.3e-06
USP28	367.703	0.132275	0.411123	1	367.703	0.0661902	0.67694	0.987729	367.703	0.0141963	0.930195	0.981553	367.703	-0.655145	6.13e-05	0.00115581	367.703	-0.803135	2.34e-06
ALDH1B1	217.459	0.0556014	0.701266	1	217.459	-0.0335714	0.810038	0.99209	217.459	0.141511	0.342637	0.713507	217.459	0.49603	0.000436891	0.00552811	217.459	0.730983	2.36e-06
SYNGR3	342.225	-0.213891	0.239825	1	342.225	-0.0229938	0.897691	0.993238	342.225	-0.0935904	0.608674	0.8721	342.225	-0.334161	0.0589116	0.192867	342.225	-0.836146	2.4e-06
NFIC	1561.82	-0.0174567	0.893239	1	1561.82	-0.290635	0.0254208	0.561735	1561.82	0.000845259	0.994874	0.999323	1561.82	-0.582075	9.54e-06	0.000271698	1561.82	-0.626239	2.41e-06
CSDE1	9565.13	-0.00909215	0.921922	1	9565.13	-0.0658187	0.477079	0.962825	9565.13	-0.150866	0.105257	0.448466	9565.13	0.014241	0.87788	0.94454	9565.13	-0.438742	2.43e-06
DAAM1	321.685	-0.15072	0.218796	1	321.685	-0.212985	0.071399	0.728701	321.685	0.21162	0.0937045	0.427739	321.685	-0.415142	0.000840708	0.00903264	321.685	-0.611961	2.47e-06
NDUFAF8	570.36	-0.136742	0.412662	1	570.36	0.0460479	0.780895	0.99209	570.36	0.201948	0.23281	0.622067	570.36	0.640475	0.000123314	0.00199695	570.36	0.813808	2.47e-06
PFKFB1	41.9364	0.340835	0.546432	1	41.9364	0.452054	0.4342	0.951072	41.9364	-0.454784	0.432944	0.778308	41.9364	-0.78515	0.17013	0.383475	41.9364	2.93876	2.54e-06
TMEM44-AS1	51.961	-0.0282504	0.928886	1	51.961	-0.226045	0.449328	0.957875	51.961	0.838959	0.00890383	0.155148	51.961	0.258764	0.386019	0.624769	51.961	1.54692	2.58e-06
PDRG1	265.338	0.430598	0.00411197	1	265.338	0.388023	0.00734097	0.431202	265.338	0.30532	0.048343	0.324157	265.338	0.621634	1.28e-05	0.000336793	265.338	0.679152	2.64e-06
MALT1	185.822	-0.162108	0.300456	1	185.822	-0.162286	0.282339	0.909604	185.822	-0.025598	0.8764	0.969123	185.822	-0.16935	0.277708	0.517245	185.822	-0.778248	2.66e-06
GNE	304.876	0.0201906	0.889204	1	304.876	-0.180267	0.201912	0.864254	304.876	-0.235555	0.118482	0.470432	304.876	-0.588702	5.74e-05	0.00110642	304.876	-0.713347	2.69e-06
NUTM2A-AS1	16.8965	-0.104616	0.835156	1	16.8965	0.257509	0.610453	0.983642	16.8965	0.970266	0.0942419	0.428806	16.8965	0.926006	0.0720424	0.221058	16.8965	2.90006	2.69e-06
KAZN	79.2406	-0.130417	0.562371	1	79.2406	0.160805	0.474868	0.962416	79.2406	-0.146308	0.547757	0.846871	79.2406	-0.504745	0.0365457	0.139151	79.2406	-1.31618	2.71e-06
LTA4H	1339.11	-0.197574	0.0675472	1	1339.11	0.0139445	0.896046	0.993238	1339.11	-0.0121406	0.911527	0.977499	1339.11	-0.0421875	0.693183	0.847759	1339.11	-0.514221	2.74e-06
SC5D	2263.77	0.0664543	0.422929	1	2263.77	0.060348	0.459756	0.961004	2263.77	-0.202332	0.0163738	0.198982	2263.77	-0.225964	0.00549203	0.036213	2263.77	-0.387362	2.74e-06
LAMB1	263.627	-0.355879	0.00478251	1	263.627	-0.359903	0.00349995	0.342021	263.627	-0.518003	0.000120703	0.0165016	263.627	-0.490651	0.000112613	0.00185466	263.627	-0.671143	2.76e-06
TMEM70	6403.07	-0.0582069	0.593306	1	6403.07	0.0527034	0.628093	0.986217	6403.07	0.11392	0.297949	0.679519	6403.07	0.429894	7.8e-05	0.00139669	6403.07	0.511423	2.77e-06
SMIM20	208.432	-0.0293808	0.862023	1	208.432	-0.00120029	0.993967	0.999254	208.432	-0.380455	0.0306232	0.266461	208.432	-0.241967	0.121437	0.311715	208.432	-0.749976	2.84e-06
PKP4	742.835	-0.195748	0.273727	1	742.835	0.0751168	0.673224	0.987729	742.835	-0.392629	0.0300255	0.264712	742.835	-0.96594	1.06e-07	6.44e-06	742.835	-0.864225	2.86e-06
ATP6V1FNB	37.4538	-0.561048	0.287193	1	37.4538	-0.487636	0.350592	0.94012	37.4538	1.78102	0.000844467	0.047045	37.4538	2.06726	9.4e-05	0.00162793	37.4538	2.5576	2.88e-06
ARL5B	519.163	0.00400461	0.968959	1	519.163	0.0539866	0.586802	0.981647	519.163	-0.191761	0.0772165	0.394721	519.163	-0.268801	0.00689107	0.043277	519.163	-0.472221	2.9e-06
SURF6	532.237	-0.15682	0.14199	1	532.237	0.113402	0.278017	0.906853	532.237	0.132134	0.230272	0.620135	532.237	0.524404	7.56e-07	3.33e-05	532.237	0.527375	2.91e-06
SNRPB	8640.17	0.0180759	0.826001	1	8640.17	-0.0388846	0.635649	0.986217	8640.17	0.171825	0.0375892	0.288803	8640.17	0.267232	0.00114619	0.0114194	8640.17	0.386105	2.96e-06
GPS1	1039.7	-0.0485191	0.58519	1	1039.7	-0.112637	0.201681	0.864254	1039.7	0.180584	0.0483238	0.324157	1039.7	0.164191	0.0670321	0.210759	1039.7	0.446429	2.96e-06
SNHG1	11984.1	0.206587	0.032938	1	11984.1	0.432855	7.59e-06	0.0113871	11984.1	0.499523	2.63e-07	0.000204242	11984.1	0.542858	1.83e-08	1.44e-06	11984.1	0.450911	3.03e-06
C10orf99	9.45974	2.64681	0.110891	1	9.45974	-2.72629	0.0404431	0.641207	9.45974	-1.27655	0.446224	0.784841	9.45974	2.98743	0.00621551	0.0398875	9.45974	6.54841	3.05e-06
RAI14	423.015	0.0786743	0.578784	1	423.015	-0.162327	0.242431	0.889527	423.015	-0.532094	0.000300209	0.0271287	423.015	-0.479781	0.000681424	0.00772706	423.015	-0.69156	3.09e-06
GPSM2	369.241	0.00231372	0.988021	1	369.241	-0.153319	0.308067	0.924963	369.241	-0.406405	0.0110616	0.170293	369.241	-0.379994	0.0122898	0.0653252	369.241	-0.718953	3.1e-06
SDK2	569.59	-0.0495401	0.77465	1	569.59	-0.296368	0.0856305	0.754254	569.59	0.386781	0.026892	0.250733	569.59	-0.924882	1.49e-07	8.48e-06	569.59	-0.837748	3.18e-06
TMED8	479.912	-0.099419	0.442894	1	479.912	0.026875	0.832613	0.992423	479.912	-0.319564	0.0177712	0.2078	479.912	-0.822631	2.78e-10	4.4e-08	479.912	-0.63564	3.21e-06
PLPP5	127.964	0.0316702	0.876392	1	127.964	0.0487662	0.809371	0.99209	127.964	0.287561	0.195672	0.580849	127.964	-0.702383	0.000645667	0.00743365	127.964	-0.91654	3.25e-06
ZNF710-AS1	112.05	0.354568	0.17682	1	112.05	-0.292321	0.254825	0.897235	112.05	-0.934086	0.000574998	0.0390271	112.05	-1.25964	3.1e-07	1.56e-05	112.05	-1.14786	3.26e-06
PRXL2A	376.791	0.112518	0.363614	1	376.791	-0.239038	0.0467697	0.677233	376.791	-0.242498	0.0619161	0.358675	376.791	-0.347955	0.00511779	0.0343853	376.791	-0.596102	3.26e-06
RPF1	1180.44	0.0878882	0.274537	1	1180.44	0.23805	0.00216674	0.276794	1180.44	0.150025	0.0667748	0.370407	1180.44	0.606724	2.57e-15	2.04e-12	1180.44	0.367842	3.31e-06
INTS12	163.336	-0.200991	0.180527	1	163.336	0.278599	0.0430807	0.653039	163.336	0.314894	0.0433773	0.308021	163.336	0.417355	0.00139408	0.0132442	163.336	0.651198	3.39e-06
COX7A2L	876.972	-0.0168015	0.883984	1	876.972	-0.0130559	0.907478	0.993238	876.972	0.00532821	0.96378	0.990543	876.972	-0.00970841	0.93056	0.969052	876.972	-0.5195	3.43e-06
ELOVL7	576.372	-0.112938	0.423303	1	576.372	0.075757	0.586112	0.981647	576.372	0.140844	0.32652	0.701057	576.372	-0.618409	1.18e-05	0.000318805	576.372	-0.674952	3.48e-06
THAP11	304.119	-0.213969	0.0430471	1	304.119	-0.257578	0.0123254	0.481339	304.119	-0.0253783	0.828821	0.954088	304.119	0.263012	0.0122166	0.0650271	304.119	0.509187	3.54e-06
REEP5	1323.64	0.0429449	0.603392	1	1323.64	-0.0189907	0.814768	0.99209	1323.64	-0.223358	0.00877475	0.15403	1323.64	0.262241	0.00133322	0.0128937	1323.64	0.393489	3.57e-06
ABCA3	41.9192	-0.00427441	0.988275	1	41.9192	-0.130536	0.640781	0.986263	41.9192	-0.0456171	0.884103	0.970569	41.9192	-0.357055	0.227445	0.458623	41.9192	-1.73799	3.58e-06
PIK3CA	65.0553	-0.159827	0.552379	1	65.0553	-0.406435	0.10458	0.772756	65.0553	-0.0436444	0.870784	0.967724	65.0553	-0.543287	0.0401067	0.148204	65.0553	-1.38213	3.61e-06
H2AW	132.58	0.0308259	0.880731	1	132.58	-0.0656676	0.740815	0.99209	132.58	-0.148469	0.498113	0.820145	132.58	0.133514	0.506252	0.723089	132.58	0.942093	3.61e-06
SNHG21	84.0711	0.00107198	0.996985	1	84.0711	0.105809	0.70312	0.991495	84.0711	-0.268536	0.355849	0.723302	84.0711	0.316448	0.2518	0.487231	84.0711	1.34029	3.81e-06
CCDC189	97.0779	-0.448534	0.0683471	1	97.0779	-0.0583327	0.811776	0.99209	97.0779	0.607813	0.0172316	0.205549	97.0779	0.231448	0.375761	0.613982	97.0779	1.45545	3.81e-06
SON	1811.51	0.0381025	0.594607	1	1811.51	0.0848989	0.229526	0.882374	1811.51	-0.0567995	0.43786	0.781092	1811.51	0.443931	3.98e-10	5.96e-08	1811.51	0.33629	3.82e-06
YBX1	3602.97	0.00717066	0.942409	1	3602.97	-0.130272	0.187022	0.858613	3602.97	-0.207344	0.0384203	0.290861	3602.97	0.208458	0.0350933	0.135367	3602.97	0.461225	3.87e-06
CCNB1	1097.36	0.0382497	0.74004	1	1097.36	-0.14842	0.192373	0.863591	1097.36	-0.0780423	0.505975	0.824967	1097.36	0.052507	0.647006	0.817679	1097.36	0.541874	3.89e-06
AKR1B1	1263.81	0.0672465	0.414892	1	1263.81	-0.0131555	0.870653	0.993238	1263.81	0.0122651	0.884424	0.970569	1263.81	0.21006	0.0100144	0.0568906	1263.81	0.393521	3.92e-06
BCL7C	227.399	-0.193946	0.147448	1	227.399	0.0409902	0.749897	0.99209	227.399	0.233992	0.0895144	0.418161	227.399	0.389189	0.00358452	0.0266122	227.399	0.665395	3.96e-06
AFMID	160.112	0.210044	0.420886	1	160.112	-0.0851331	0.742355	0.99209	160.112	-0.0997297	0.713008	0.911473	160.112	0.946461	0.000237895	0.0034046	160.112	1.20877	4.01e-06
OAT	274.511	0.0157961	0.919433	1	274.511	-0.0588515	0.695995	0.988849	274.511	-0.44447	0.00608561	0.130197	274.511	-0.132961	0.388628	0.626986	274.511	-0.768628	4.03e-06
NEK6	206.176	-0.279042	0.138581	1	206.176	0.0903036	0.629242	0.986217	206.176	-0.122971	0.527634	0.83556	206.176	-0.864269	7.67e-06	0.000228837	206.176	-0.957127	4.06e-06
AP3S1	1495.8	-0.0683916	0.589089	1	1495.8	-0.0285696	0.820027	0.99209	1495.8	-0.165781	0.195985	0.581249	1495.8	-0.124584	0.319534	0.561456	1495.8	-0.579528	4.06e-06
THAP7-AS1	305.003	-0.377911	0.122795	1	305.003	-0.025812	0.915216	0.993238	305.003	0.276824	0.261437	0.647712	305.003	0.363256	0.133932	0.331355	305.003	1.13925	4.09e-06
LOC112268106	156.904	-0.0261028	0.91555	1	156.904	-0.16365	0.49427	0.964518	156.904	-0.90233	0.000450926	0.0338586	156.904	-0.637615	0.00826309	0.049599	156.904	-1.135	4.13e-06
UTP3	416.618	0.312628	0.0220915	1	416.618	-0.066958	0.612487	0.983834	416.618	0.270833	0.0535744	0.337675	416.618	0.885225	2.47e-11	5.51e-09	416.618	0.632459	4.18e-06
TLN1	2682.03	-0.118495	0.170979	1	2682.03	-0.0968887	0.261918	0.899985	2682.03	0.00676309	0.938571	0.984581	2682.03	-0.233983	0.00724409	0.0449691	2682.03	-0.411718	4.19e-06
ASB12	14.3204	0.75439	0.173983	1	14.3204	1.54262	0.00923443	0.462138	14.3204	0.503232	0.537841	0.841016	14.3204	2.04829	8.4e-05	0.00148501	14.3204	2.53549	4.24e-06
MRE11	959.368	-0.0522533	0.577052	1	959.368	-0.0749192	0.412869	0.945119	959.368	0.0389716	0.685523	0.901506	959.368	-0.191422	0.036536	0.139151	959.368	-0.442005	4.28e-06
STON1	293.628	-0.134495	0.504228	1	293.628	-0.0300066	0.878586	0.993238	293.628	-0.324992	0.113845	0.46237	293.628	-1.21978	7.36e-10	9.99e-08	293.628	-0.9158	4.31e-06
PLOD1	299.617	-0.158888	0.230263	1	299.617	-0.193562	0.144018	0.823458	299.617	0.323501	0.0199759	0.223053	299.617	-0.411781	0.00312244	0.0240491	299.617	-0.697894	4.31e-06
VCAN	452.63	-0.182004	0.23417	1	452.63	-0.096217	0.522858	0.968306	452.63	-0.210997	0.177472	0.556925	452.63	-0.489338	0.00137121	0.0131482	452.63	-0.735465	4.34e-06
OR2B6	11.5609	-1.98153	0.0182911	1	11.5609	0.330181	0.581988	0.981647	11.5609	-1.6796	0.0366104	0.285633	11.5609	0.595372	0.324596	0.566172	11.5609	2.65765	4.35e-06
DDX50	657.57	-0.00962042	0.924323	1	657.57	0.124165	0.199454	0.864244	657.57	-0.114009	0.27035	0.654728	657.57	-0.0817146	0.395733	0.633863	657.57	-0.458714	4.39e-06
RHOB	1117.76	0.320877	0.00607482	1	1117.76	0.282498	0.0141946	0.494605	1117.76	-0.107482	0.359816	0.72595	1117.76	-0.455896	6.53e-05	0.00121142	1117.76	-0.54289	4.4e-06
STOML2	1123.54	0.108044	0.231907	1	1123.54	0.278432	0.00166257	0.246828	1123.54	-0.0374382	0.685059	0.901446	1123.54	0.323535	0.000238928	0.00341266	1123.54	0.421297	4.44e-06
INPP4A	302.861	0.145768	0.307065	1	302.861	-0.118132	0.400724	0.943195	302.861	-0.187964	0.20362	0.587603	302.861	-1.02903	3.37e-12	9.23e-10	302.861	-0.724219	4.47e-06
AP5B1	185.639	0.0684028	0.602157	1	185.639	0.0281798	0.826982	0.992423	185.639	0.146808	0.295321	0.676735	185.639	0.23154	0.0854731	0.246885	185.639	0.690779	4.47e-06
PFDN4	301.811	0.122108	0.427717	1	301.811	0.0377233	0.797014	0.99209	301.811	0.199637	0.203776	0.587603	301.811	0.234362	0.106035	0.284234	301.811	0.672379	4.48e-06
TMEM225B	230.676	-0.0118088	0.9317	1	230.676	0.26559	0.0479269	0.682386	230.676	0.12368	0.39168	0.745775	230.676	0.12925	0.328222	0.570075	230.676	-0.637615	4.49e-06
SPARC	419.95	0.0223028	0.871292	1	419.95	-0.194577	0.147513	0.828345	419.95	-0.134652	0.334833	0.707683	419.95	-0.244915	0.0718031	0.220463	419.95	-0.63604	4.54e-06
CDC25C	209.183	-0.180418	0.233352	1	209.183	0.0338616	0.812463	0.99209	209.183	-0.264954	0.085485	0.410344	209.183	0.204744	0.14954	0.353091	209.183	0.664115	4.57e-06
MAMDC4	18.7866	-0.453861	0.268526	1	18.7866	0.960989	0.0380702	0.636652	18.7866	-0.156675	0.730369	0.918035	18.7866	0.241863	0.599706	0.789255	18.7866	3.12321	4.61e-06
NGRN	1261.72	0.0521804	0.608877	1	1261.72	-0.0145297	0.884562	0.993238	1261.72	0.0219524	0.832111	0.954477	1261.72	0.50977	2.92e-07	1.5e-05	1261.72	0.458702	4.65e-06
LINC01970	74.1846	-0.313127	0.380631	1	74.1846	-0.340875	0.332779	0.934913	74.1846	-0.112907	0.763428	0.930518	74.1846	0.323978	0.352877	0.591973	74.1846	1.64262	4.67e-06
MSH2	1161.36	0.0302472	0.756622	1	1161.36	0.0409217	0.670928	0.987729	1161.36	-0.0510343	0.610044	0.872161	1161.36	-0.200641	0.0386809	0.144777	1161.36	-0.459587	4.69e-06
LRCH2	159.24	-0.0621262	0.69186	1	159.24	-0.00894913	0.951371	0.996049	159.24	-0.288329	0.0841038	0.40754	159.24	-0.103523	0.471233	0.695699	159.24	-0.719402	4.7e-06
GRSF1	871.671	-0.109949	0.143403	1	871.671	0.0221701	0.762054	0.99209	871.671	-0.150507	0.0581538	0.348891	871.671	0.00964915	0.899224	0.955129	871.671	-0.387727	4.76e-06
FEM1B	2189.9	-0.00863136	0.922312	1	2189.9	0.0507765	0.560284	0.97752	2189.9	0.0572645	0.521894	0.833642	2189.9	0.308786	0.000381237	0.00494893	2189.9	0.399195	4.92e-06
TSR2	494.826	0.0275237	0.843795	1	494.826	-0.0418071	0.762117	0.99209	494.826	0.506749	0.000361752	0.030085	494.826	0.502632	0.000262675	0.00367593	494.826	0.644662	4.93e-06
TSPAN18	207.077	0.0413277	0.868988	1	207.077	-0.108635	0.66117	0.986879	207.077	-0.432864	0.0910672	0.421484	207.077	-1.1857	3.66e-06	0.000124362	207.077	-1.22523	4.95e-06
BCAR3	428.612	0.0612845	0.711169	1	428.612	-0.233855	0.151463	0.833686	428.612	-0.824945	2.03e-06	0.000971015	428.612	-0.747456	6.61e-06	0.00020398	428.612	-0.760992	4.97e-06
SNHG19	169.557	-0.149154	0.477727	1	169.557	0.115171	0.577651	0.981647	169.557	0.0606261	0.774375	0.934494	169.557	0.573381	0.00451201	0.0314046	169.557	0.951234	5.02e-06
YTHDF3	223.442	-0.007873	0.960317	1	223.442	0.287615	0.0583446	0.69925	223.442	0.0426225	0.794388	0.940808	223.442	1.01874	4.61e-11	9.42e-09	223.442	0.7512	5.12e-06
ECHS1	875.682	0.0349979	0.687599	1	875.682	-0.0241927	0.777934	0.99209	875.682	-0.0781662	0.386702	0.742784	875.682	0.32855	0.000160716	0.00245485	875.682	0.430572	5.15e-06
NKIRAS2	457.583	0.143192	0.20107	1	457.583	-0.00930752	0.933698	0.99546	457.583	0.0760593	0.517757	0.831198	457.583	0.0503834	0.669096	0.831989	457.583	0.570603	5.16e-06
TEPSIN	153.897	-0.0112426	0.954938	1	153.897	-0.281922	0.14897	0.829853	153.897	0.355255	0.0836323	0.406218	153.897	0.190154	0.334583	0.575712	153.897	0.945801	5.23e-06
CCDC84	354.197	-0.141946	0.447686	1	354.197	0.0241484	0.896842	0.993238	354.197	0.0869826	0.64993	0.88753	354.197	0.292214	0.125117	0.317263	354.197	0.887494	5.27e-06
DCLRE1C	223.072	0.0737523	0.708817	1	223.072	0.267695	0.168578	0.848271	223.072	0.310621	0.11789	0.469838	223.072	0.486209	0.0123142	0.0653785	223.072	0.917678	5.36e-06
SELENOO	2206.05	0.111304	0.441359	1	2206.05	-0.295651	0.0406178	0.641207	2206.05	0.122633	0.398209	0.750862	2206.05	-0.444067	0.00221019	0.0186703	2206.05	-0.66473	5.37e-06
PLPP6	94.161	-0.0357476	0.876779	1	94.161	0.19032	0.393172	0.941267	94.161	-0.143153	0.543586	0.844334	94.161	0.553224	0.010306	0.0575788	94.161	1.05288	5.38e-06
APMAP	655.356	0.0390521	0.703904	1	655.356	-0.11008	0.272107	0.902233	655.356	-0.075059	0.483925	0.810471	655.356	-0.0731261	0.472462	0.696467	655.356	-0.483114	5.44e-06
SFPQ	2877.44	-0.0116527	0.907855	1	2877.44	0.0998519	0.3195	0.930927	2877.44	-0.00244078	0.980854	0.995196	2877.44	0.496102	8.97e-07	3.79e-05	2877.44	0.467614	5.44e-06
COL27A1	189.984	0.211407	0.232197	1	189.984	-0.0993478	0.572884	0.980013	189.984	-0.391923	0.0334819	0.275349	189.984	-0.598811	0.000990974	0.0101587	189.984	-0.882876	5.55e-06
DET1	281.701	0.11849	0.383721	1	281.701	0.0862204	0.510797	0.968306	281.701	-0.0108796	0.938646	0.984581	281.701	-0.791757	5.1e-09	5.07e-07	281.701	-0.67067	5.66e-06
ZNF574	772.874	0.158418	0.1974	1	772.874	0.0361001	0.767231	0.99209	772.874	0.256941	0.0414194	0.300798	772.874	0.643576	1.42e-07	8.17e-06	772.874	0.570847	5.67e-06
MIR7111	150.348	-0.0143898	0.944509	1	150.348	0.0012327	0.995193	0.999254	150.348	0.133498	0.531706	0.838255	150.348	0.629864	0.00159965	0.0146142	150.348	0.924745	5.7e-06
TLCD4	350.486	0.0606797	0.693031	1	350.486	-0.0810758	0.587233	0.981647	350.486	-0.154163	0.328634	0.702609	350.486	-0.802219	1.55e-07	8.74e-06	350.486	-0.688184	5.75e-06
RAB8A	657.014	0.0962009	0.493982	1	657.014	0.047005	0.735196	0.99209	657.014	0.164905	0.249369	0.63798	657.014	0.625	7.26e-06	0.000219112	657.014	0.647801	5.75e-06
CAMSAP2	383.394	0.0338632	0.837769	1	383.394	0.0475693	0.768916	0.99209	383.394	-0.0269084	0.87239	0.968332	383.394	0.405202	0.0123807	0.0655409	383.394	0.750602	5.83e-06
BCAP31	2540.87	0.00180607	0.98257	1	2540.87	0.011346	0.89035	0.993238	2540.87	0.124575	0.137082	0.4984	2540.87	0.261639	0.00160909	0.0146912	2540.87	0.383805	5.86e-06
FKBP14	130.369	-0.338271	0.0321106	1	130.369	-0.131736	0.405586	0.943795	130.369	-0.481064	0.00749605	0.143697	130.369	-0.467353	0.00418722	0.0298448	130.369	-0.781404	5.88e-06
LINC01311	200.983	0.162924	0.503665	1	200.983	-0.12095	0.620223	0.986123	200.983	0.397771	0.111051	0.458208	200.983	0.605412	0.0125545	0.0662972	200.983	1.13554	5.9e-06
KCTD12	1189.22	-0.0278551	0.797821	1	1189.22	-0.0445788	0.678154	0.987729	1189.22	-0.197263	0.0727455	0.38511	1189.22	-0.617797	1.69e-08	1.37e-06	1189.22	-0.529666	5.98e-06
TXNL4B	173.743	0.227148	0.253353	1	173.743	0.291677	0.126823	0.80699	173.743	0.0342932	0.86466	0.965053	173.743	0.629622	0.00113847	0.0113659	173.743	0.894678	6e-06
GPM6B	216.857	-0.0293606	0.853621	1	216.857	0.0112738	0.94168	0.99546	216.857	-0.459925	0.00524205	0.123246	216.857	-0.0725757	0.642927	0.816021	216.857	-0.760486	6.08e-06
TBCC	194.836	0.22862	0.153673	1	194.836	0.12836	0.408405	0.944969	194.836	0.615638	0.000191497	0.0227209	194.836	0.532244	0.000532978	0.00646239	194.836	0.730485	6.16e-06
FDX2	125.624	-0.043456	0.854947	1	125.624	0.0170266	0.942832	0.995608	125.624	-0.0102079	0.967521	0.991899	125.624	0.749529	0.00178757	0.0158912	125.624	1.11505	6.19e-06
SLC25A15	138.003	-0.165816	0.414723	1	138.003	0.354865	0.0678102	0.721244	138.003	-0.172018	0.410724	0.760439	138.003	-0.393128	0.0499441	0.171917	138.003	-1.02571	6.3e-06
ALKBH2	233.821	0.187319	0.200983	1	233.821	0.250649	0.0785552	0.739361	233.821	0.0325585	0.829285	0.954088	233.821	0.432269	0.00199608	0.0173105	233.821	0.683301	6.3e-06
LOC107984243	146.782	-0.702933	0.00770643	1	146.782	-0.508645	0.0445678	0.661661	146.782	-0.147788	0.577371	0.85975	146.782	0.380478	0.123504	0.314684	146.782	1.12786	6.33e-06
BEX3	50015.8	0.144543	0.120541	1	50015.8	-0.232147	0.0126173	0.485639	50015.8	0.000171214	0.998533	1	50015.8	0.225292	0.0154904	0.0765875	50015.8	0.420501	6.36e-06
EIF6	3304.97	0.0827609	0.46067	1	3304.97	0.126009	0.259604	0.89889	3304.97	0.259236	0.0213557	0.231311	3304.97	0.47932	1.82e-05	0.000450506	3304.97	0.509838	6.37e-06
QDPR	349.425	-0.169583	0.151328	1	349.425	-0.0916898	0.428613	0.948856	349.425	-0.368997	0.00309699	0.0956619	349.425	0.167499	0.159428	0.367955	349.425	0.575211	6.37e-06
ZWILCH	1037.73	-0.0290719	0.79782	1	1037.73	-0.0117299	0.916532	0.993238	1037.73	-0.0275095	0.810803	0.947562	1037.73	-0.327541	0.0034784	0.0260048	1037.73	-0.517353	6.43e-06
GUSB	120.32	0.0887226	0.579871	1	120.32	-0.00604614	0.969813	0.998141	120.32	-0.0505035	0.764312	0.931011	120.32	-0.0243288	0.882721	0.946993	120.32	0.82287	6.46e-06
EMX2OS	132.79	0.392073	0.0637973	1	132.79	0.228051	0.263087	0.899985	132.79	-0.35349	0.112305	0.460325	132.79	-1.63461	1.57e-13	5.86e-11	132.79	-0.978088	6.49e-06
LRRTM2	10.8132	0.864093	0.336693	1	10.8132	-0.0238118	0.978665	0.999254	10.8132	-1.77289	0.125003	0.482475	10.8132	2.56973	0.000975295	0.0100728	10.8132	4.24257	6.55e-06
GALNT4	246.767	0.437958	0.0672548	1	246.767	0.384824	0.104795	0.772756	246.767	0.47121	0.0517805	0.332329	246.767	0.773291	0.00108019	0.0108737	246.767	1.08537	6.56e-06
POC1B-GALNT4	246.767	0.437958	0.0672548	1	246.767	0.384824	0.104795	0.772756	246.767	0.47121	0.0517805	0.332329	246.767	0.773291	0.00108019	0.0108737	246.767	1.08537	6.56e-06
RPS10-NUDT3	687.336	-0.0036979	0.980951	1	687.336	0.127302	0.403952	0.943368	687.336	0.0607502	0.69708	0.904843	687.336	0.295404	0.052416	0.177896	687.336	0.691168	6.66e-06
SCNM1	451.639	-0.109552	0.457632	1	451.639	0.0782481	0.589871	0.982269	451.639	0.633957	1.77e-05	0.00474408	451.639	0.639999	1.03e-05	0.000288901	451.639	0.665453	6.79e-06
G6PC3	1485.35	-0.00342935	0.968656	1	1485.35	-0.0435581	0.615359	0.98449	1485.35	0.101612	0.256178	0.644285	1485.35	-0.041122	0.642351	0.815584	1485.35	0.420986	6.87e-06
TNFAIP8L2-SCNM1	451.533	-0.109563	0.457986	1	451.533	0.0782434	0.590232	0.982368	451.533	0.636303	1.68e-05	0.00469258	451.533	0.638931	1.09e-05	0.000299976	451.533	0.665475	6.92e-06
GLRX3	700.664	0.16264	0.104836	1	700.664	0.0984801	0.314001	0.926448	700.664	0.148576	0.157914	0.526259	700.664	0.380611	0.000110295	0.00182893	700.664	0.459878	6.93e-06
TMEM184B	414.967	0.0367424	0.72848	1	414.967	0.0650823	0.531487	0.968963	414.967	-0.229882	0.0372689	0.287908	414.967	-0.631394	2.91e-08	2.15e-06	414.967	-0.526152	7.01e-06
PHTF2	259.376	0.00255925	0.988073	1	259.376	-0.00888216	0.957183	0.996075	259.376	-0.221322	0.209078	0.595222	259.376	-0.121193	0.473642	0.697216	259.376	-0.796478	7.1e-06
RBM12B	398.755	-0.0877682	0.459903	1	398.755	-0.100866	0.376085	0.941267	398.755	0.375217	0.00234474	0.0826638	398.755	0.709266	1.42e-10	2.65e-08	398.755	0.498778	7.26e-06
SRCAP	254.117	0.14997	0.627936	1	254.117	0.0151405	0.961114	0.997278	254.117	0.339067	0.28066	0.664074	254.117	0.25128	0.425446	0.658712	254.117	1.42832	7.3e-06
TGFBR3	322.483	-0.121027	0.409993	1	322.483	-0.303011	0.0381306	0.636767	322.483	-0.350608	0.0228259	0.237631	322.483	-0.465616	0.00214485	0.0183379	322.483	-0.713844	7.34e-06
GATA2	116.393	0.184048	0.308576	1	116.393	0.196734	0.275133	0.904907	116.393	0.219557	0.262001	0.647937	116.393	0.454333	0.00858417	0.0509369	116.393	0.833252	7.34e-06
DPM2	119.619	0.251937	0.184942	1	119.619	0.0331152	0.858263	0.993238	119.619	0.358447	0.0710881	0.382194	119.619	0.504418	0.00892183	0.052469	119.619	0.98606	7.5e-06
NEFM	1013.39	-0.0172815	0.9149	1	1013.39	-0.193834	0.227309	0.880802	1013.39	-0.211525	0.191933	0.575229	1013.39	-0.181969	0.255321	0.490906	1013.39	-0.745667	7.52e-06
MKNK2	781.39	-0.106636	0.337446	1	781.39	-0.167729	0.129548	0.811273	781.39	-0.027733	0.810224	0.947375	781.39	-0.399366	0.000528666	0.0064209	781.39	-0.523361	7.62e-06
STAM2	468.98	-0.0175973	0.888273	1	468.98	0.0317042	0.795579	0.99209	468.98	-0.121657	0.349645	0.719519	468.98	-0.851289	3.02e-11	6.56e-09	468.98	-0.568298	7.63e-06
DPH7	673.099	0.066463	0.488426	1	673.099	0.115085	0.225905	0.879378	673.099	0.259411	0.0090926	0.156681	673.099	0.352169	0.000309334	0.00419551	673.099	0.465079	7.64e-06
RPL26L1	275.699	-0.0164139	0.918641	1	275.699	0.121047	0.440022	0.954506	275.699	0.067179	0.685514	0.901506	275.699	0.550044	0.000432719	0.00548488	275.699	0.731022	7.65e-06
RALGAPA2	354.147	0.0267539	0.869867	1	354.147	-0.113389	0.484799	0.964518	354.147	-0.265732	0.110803	0.457761	354.147	-0.531428	0.0012947	0.0126304	354.147	-0.810179	7.68e-06
HERPUD1	257.221	-0.059051	0.7298	1	257.221	-0.405865	0.0153275	0.504768	257.221	-0.547627	0.00246514	0.0847692	257.221	-0.218852	0.19777	0.420924	257.221	-0.766451	7.69e-06
REXO2	654.007	0.162891	0.0934265	1	654.007	0.191161	0.0444744	0.661661	654.007	-0.146803	0.147211	0.512569	654.007	-0.0290127	0.761324	0.888078	654.007	-0.449781	7.74e-06
BAAT	12.0424	-0.552677	0.505642	1	12.0424	-0.779498	0.257417	0.898552	12.0424	0.0462066	0.950843	0.986908	12.0424	2.03019	0.00110363	0.0110714	12.0424	3.01863	7.77e-06
GLRX5	1173.57	-0.0131303	0.917604	1	1173.57	-0.112807	0.37009	0.94012	1173.57	0.45404	0.000394898	0.0317577	1173.57	0.436801	0.000559705	0.0066696	1173.57	0.575762	7.9e-06
CCNL1	177.455	0.158883	0.461501	1	177.455	0.0609594	0.771566	0.99209	177.455	0.138325	0.526273	0.835021	177.455	0.840114	5.37e-05	0.00104475	177.455	0.963147	7.91e-06
ZNF282	2241.34	0.0301923	0.738196	1	2241.34	0.078304	0.383889	0.941267	2241.34	0.167326	0.0674374	0.372457	2241.34	0.364275	5.14e-05	0.00101031	2241.34	0.409552	7.95e-06
FARSA	3044.23	-0.0461497	0.626958	1	3044.23	0.0971613	0.304553	0.924963	3044.23	0.353075	0.000226777	0.0233737	3044.23	0.113744	0.230264	0.462375	3044.23	0.434538	7.96e-06
KIAA0319L	851.924	-0.0984253	0.30274	1	851.924	0.0105864	0.910857	0.993238	851.924	0.0524576	0.591269	0.866101	851.924	-0.39616	4.25e-05	0.000869292	851.924	-0.453381	7.98e-06
SEPTIN8	650.408	0.156297	0.18834	1	650.408	-0.124603	0.288081	0.913805	650.408	0.0199566	0.868845	0.966939	650.408	-0.243143	0.0430969	0.155141	650.408	-0.563711	7.99e-06
TMEM145	67.8431	0.0502799	0.841202	1	67.8431	0.0853441	0.73723	0.99209	67.8431	0.225447	0.422421	0.770711	67.8431	0.359025	0.168569	0.3817	67.8431	1.3618	8.02e-06
IQCC	47.9358	0.0594195	0.828885	1	47.9358	0.602866	0.0242363	0.555202	47.9358	0.509005	0.0798059	0.400706	47.9358	1.40105	3.9e-07	1.89e-05	47.9358	1.39676	8.04e-06
ATP1A1	1769.55	-0.146668	0.069667	1	1769.55	-0.221797	0.0055993	0.383992	1769.55	-0.0169446	0.837997	0.956141	1769.55	-0.000640779	0.99366	0.997303	1769.55	-0.375229	8.06e-06
ANKRD40	1552.14	0.0330464	0.754435	1	1552.14	0.0456433	0.663434	0.986951	1552.14	0.065818	0.538965	0.841753	1552.14	0.250062	0.0180875	0.0854159	1552.14	0.478006	8.13e-06
LAMA1	373.468	-0.410868	0.0937767	1	373.468	-0.144432	0.554356	0.976023	373.468	0.0157468	0.949444	0.986699	373.468	-0.242651	0.319892	0.561744	373.468	-1.13454	8.18e-06
TALAM1	1103.21	-0.369895	0.0661391	1	1103.21	-0.59034	0.00318891	0.33397	1103.21	-0.639732	0.00170486	0.0689939	1103.21	0.507412	0.0112163	0.0613433	1103.21	-0.889004	8.2e-06
TRIQK	103.818	-0.0311416	0.900482	1	103.818	-0.182497	0.446446	0.956047	103.818	-0.278893	0.28202	0.665216	103.818	-0.841941	0.000333507	0.00446088	103.818	-1.04758	8.26e-06
TMCC2	107.724	0.191826	0.35217	1	107.724	0.0130155	0.948775	0.996049	107.724	0.332948	0.120724	0.475426	107.724	0.32568	0.101714	0.276118	107.724	0.89733	8.3e-06
C11orf1	439.02	-0.11877	0.47111	1	439.02	0.00558222	0.972746	0.998238	439.02	-0.124409	0.463487	0.797855	439.02	0.416075	0.00922729	0.0537002	439.02	0.718096	8.32e-06
UGP2	399.253	-0.0351692	0.767099	1	399.253	0.145945	0.200945	0.864244	399.253	-0.315148	0.0105238	0.16657	399.253	-0.456635	7.59e-05	0.00136775	399.253	-0.535802	8.38e-06
GXYLT2	113.466	-0.373931	0.122272	1	113.466	0.291657	0.22683	0.88051	113.466	-0.0360359	0.885866	0.970569	113.466	-0.322154	0.19656	0.41927	113.466	-1.1746	8.41e-06
FOCAD	298.915	-0.157679	0.194344	1	298.915	-0.138832	0.234776	0.884508	298.915	-0.150289	0.230598	0.620144	298.915	-0.213115	0.0731766	0.223499	298.915	-0.593742	8.46e-06
ASCC1	783.259	0.0358302	0.709699	1	783.259	-0.0442501	0.633776	0.986217	783.259	0.120249	0.219076	0.60726	783.259	-0.0471391	0.608621	0.794682	783.259	-0.41295	8.49e-06
SPACA9	167.999	0.235831	0.266371	1	167.999	-0.156831	0.451031	0.95925	167.999	-0.1132	0.601909	0.868526	167.999	-0.652175	0.00186657	0.0164028	167.999	-0.962262	8.61e-06
HSPA13	398.649	-0.202692	0.151957	1	398.649	0.0996135	0.46193	0.961004	398.649	0.0531441	0.716298	0.912086	398.649	-0.0753608	0.568506	0.766984	398.649	-0.579373	8.7e-06
LOC101927383	11.4815	3.99468	0.00662242	1	11.4815	-1.53507	0.186603	0.858613	11.4815	-3.56853	0.0158004	0.195374	11.4815	2.5756	0.00288775	0.0226254	11.4815	3.87612	8.75e-06
TMEM150C	30.6355	-0.292031	0.497242	1	30.6355	-0.184565	0.65926	0.986879	30.6355	-0.301072	0.496383	0.818742	30.6355	-1.89923	4.16e-05	0.000856917	30.6355	-2.37692	8.76e-06
PPP6C	1745.29	0.0724645	0.382739	1	1745.29	-0.0467361	0.567272	0.979131	1745.29	-0.0253126	0.764745	0.93132	1745.29	0.291124	0.000367905	0.00482327	1745.29	0.369082	8.85e-06
DYRK1A	990.005	0.1244	0.194441	1	990.005	-0.127439	0.175593	0.852901	990.005	0.160392	0.102191	0.442807	990.005	0.556816	2.49e-09	2.79e-07	990.005	0.423452	8.9e-06
FITM2	494.236	-0.112655	0.492735	1	494.236	-0.0359552	0.823819	0.992423	494.236	0.0874573	0.60037	0.868218	494.236	0.227741	0.159743	0.368205	494.236	0.733927	8.94e-06
SLC38A2	2146.18	-0.227803	0.0310826	1	2146.18	-0.244323	0.0200195	0.53444	2146.18	-0.319847	0.00290151	0.0939545	2146.18	-0.5189	9.25e-07	3.89e-05	2146.18	-0.472027	8.99e-06
PNPO	493.851	-0.0682452	0.575391	1	493.851	0.0709875	0.558323	0.977445	493.851	0.123236	0.326614	0.701057	493.851	0.258252	0.0392058	0.145797	493.851	0.655349	9.03e-06
RPL10A	7450.35	0.0403867	0.710068	1	7450.35	0.0976062	0.367838	0.94012	7450.35	0.064338	0.554539	0.850098	7450.35	0.120345	0.266362	0.503733	7450.35	0.482146	9.09e-06
GTF2IRD1	140.947	-0.271944	0.233174	1	140.947	-0.00591248	0.978919	0.999254	140.947	-0.0400238	0.865808	0.965508	140.947	-1.09866	2.44e-06	8.93e-05	140.947	-1.04355	9.14e-06
UBE2F	311.229	-0.0112232	0.939895	1	311.229	0.0115734	0.936833	0.99546	311.229	0.310355	0.0413557	0.300798	311.229	0.311538	0.0327393	0.129513	311.229	0.668096	9.19e-06
LOC105373690	17.3401	0.44603	0.565654	1	17.3401	-1.02559	0.110353	0.777773	17.3401	1.63159	0.015177	0.193417	17.3401	1.73954	0.00648614	0.0413054	17.3401	3.56454	9.19e-06
NRTN	91.6861	-0.212268	0.309531	1	91.6861	-0.147659	0.466637	0.961004	91.6861	-0.195997	0.376971	0.736526	91.6861	-1.58692	1.67e-12	5.15e-10	91.6861	-1.05365	9.22e-06
MKS1	1065	0.0485522	0.820993	1	1065	0.289659	0.175058	0.852228	1065	0.343498	0.110211	0.456597	1065	1.13536	1.01e-07	6.18e-06	1065	0.954572	9.42e-06
STC2	1342.24	0.0217723	0.836954	1	1342.24	-0.175595	0.0950056	0.760283	1342.24	-0.312582	0.00363973	0.105775	1342.24	-0.304398	0.00388337	0.028219	1342.24	-0.477691	9.54e-06
WBP11	1184.4	0.115489	0.249734	1	1184.4	0.0948335	0.338043	0.937005	1184.4	0.102835	0.313886	0.689966	1184.4	0.19983	0.0442818	0.158238	1184.4	0.451942	9.61e-06
PHLDB2	86.8752	0.0959951	0.677113	1	86.8752	-0.158909	0.473782	0.962382	86.8752	0.262234	0.267536	0.652456	86.8752	-0.309634	0.170287	0.383621	86.8752	-1.0625	9.81e-06
SLC25A30	149.019	0.252952	0.123119	1	149.019	-0.297992	0.0557316	0.698454	149.019	-0.357016	0.0441801	0.309681	149.019	-0.786226	1.23e-06	4.97e-05	149.019	-0.754866	1e-05
GGPS1	1925.31	-0.08885	0.190886	1	1925.31	0.182434	0.00563024	0.384164	1925.31	0.169312	0.0134423	0.183136	1925.31	-0.0732793	0.259375	0.495162	1925.31	-0.289213	1.02e-05
UCK1	238.357	0.0378235	0.77167	1	238.357	0.105627	0.413203	0.945119	238.357	0.500783	0.00027832	0.0264561	238.357	0.469495	0.000484641	0.00602731	238.357	0.638899	1.02e-05
PCNX2	249.383	0.285586	0.0522399	1	249.383	0.0844217	0.560549	0.97752	249.383	0.245434	0.103518	0.446189	249.383	0.0373936	0.794653	0.905231	249.383	0.672906	1.02e-05
LOC107984338	16.6659	-0.132905	0.796346	1	16.6659	0.526923	0.242814	0.890208	16.6659	0.0608972	0.901289	0.974282	16.6659	0.938555	0.0480733	0.167582	16.6659	2.3165	1.02e-05
FSTL1	608.593	0.00547065	0.968721	1	608.593	-0.0180319	0.895309	0.993238	608.593	-0.270075	0.0569413	0.344775	608.593	-0.361353	0.0087134	0.0515354	608.593	-0.613801	1.03e-05
GCC1	97.7888	0.406429	0.0576315	1	97.7888	0.0880482	0.671696	0.987729	97.7888	0.0468107	0.837343	0.956133	97.7888	0.779615	0.00017623	0.0026452	97.7888	0.988225	1.03e-05
WWP1	134.103	-0.0821585	0.675372	1	134.103	0.165421	0.385077	0.941267	134.103	-0.427248	0.0369515	0.286985	134.103	-0.729161	0.000227491	0.00327814	134.103	-0.937923	1.04e-05
DPY19L1	879.384	-0.0677941	0.444522	1	879.384	-0.123488	0.155839	0.837896	879.384	-0.124034	0.17517	0.553726	879.384	-0.35794	6.59e-05	0.00121724	879.384	-0.416487	1.04e-05
LYRM2	766.925	0.0624922	0.49815	1	766.925	0.262838	0.00331037	0.336892	766.925	0.204498	0.0305555	0.266391	766.925	0.302465	0.000832821	0.00900786	766.925	0.429688	1.04e-05
BACE2	489.506	-0.162455	0.205453	1	489.506	-0.138801	0.272521	0.902233	489.506	-0.0747632	0.571395	0.857192	489.506	-0.590139	4.09e-06	0.00013634	489.506	-0.591617	1.05e-05
RALA	625.332	0.167997	0.146228	1	625.332	0.00993054	0.929695	0.99546	625.332	0.0110074	0.926063	0.980805	625.332	0.0352685	0.755505	0.884894	625.332	-0.502801	1.06e-05
TRAPPC5	380.981	-0.0208632	0.843868	1	380.981	-0.117475	0.253457	0.89573	380.981	0.391876	0.000340782	0.0294265	380.981	0.356894	0.000598967	0.00701661	380.981	0.476598	1.06e-05
SLC6A15	261.742	-0.184878	0.204776	1	261.742	-0.110204	0.433826	0.951072	261.742	0.166911	0.269878	0.654266	261.742	-0.100975	0.483648	0.704873	261.742	-0.688501	1.07e-05
PAPOLG	568.511	0.261163	0.0233077	1	568.511	0.102615	0.363253	0.94012	568.511	0.120179	0.31168	0.688522	568.511	0.0724321	0.514661	0.729504	568.511	0.501339	1.07e-05
NSD3	1942.17	0.0379374	0.648963	1	1942.17	0.316733	0.000124371	0.0542018	1942.17	-0.416517	9.84e-07	0.000546294	1942.17	-0.10912	0.188407	0.408498	1942.17	-0.372115	1.08e-05
CSE1L	3458.19	-0.0190934	0.808883	1	3458.19	0.017353	0.82454	0.992423	3458.19	-0.294268	0.000221871	0.0233459	3458.19	-0.00870137	0.911841	0.960925	3458.19	-0.352519	1.08e-05
LINC02560	8.92577	-1.43032	0.209893	1	8.92577	1.32215	0.367687	NA	8.92577	-2.31246	0.142672	0.506872	8.92577	8.08746	6.9e-08	4.44e-06	8.92577	6.60987	1.08e-05
CAPN5	70.7404	-0.136207	0.619794	1	70.7404	-0.217799	0.42638	0.948357	70.7404	-0.459023	0.127767	0.485687	70.7404	-0.406493	0.159731	0.368205	70.7404	-1.57296	1.09e-05
ATP6V1A	6324.83	0.0664574	0.384168	1	6324.83	-0.0274857	0.717777	0.99209	6324.83	-0.108399	0.158799	0.527396	6324.83	-0.227708	0.00288725	0.0226254	6324.83	-0.340055	1.1e-05
SDCBP	792.926	-0.0476667	0.666766	1	792.926	0.0362484	0.737282	0.99209	792.926	-0.181638	0.106529	0.449576	792.926	-0.181215	0.0935665	0.262232	792.926	-0.48413	1.12e-05
ERCC6L	241.561	-0.112153	0.440634	1	241.561	0.0219121	0.876227	0.993238	241.561	0.146917	0.329481	0.702958	241.561	0.398897	0.00409878	0.029431	241.561	0.630759	1.12e-05
KLHL41	32.6376	-0.104145	0.765187	1	32.6376	-0.719016	0.0228597	0.546697	32.6376	-0.902767	0.0281813	0.256153	32.6376	-0.0412641	0.89138	0.950764	32.6376	-1.43446	1.13e-05
YWHAG	1965.62	-0.144721	0.216855	1	1965.62	0.0693732	0.5529	0.975959	1965.62	0.109332	0.356158	0.723302	1965.62	0.451485	0.000111141	0.00183668	1965.62	0.519689	1.13e-05
SSR3	1183.67	-0.0390324	0.674213	1	1183.67	-0.00101125	0.991155	0.999254	1183.67	-0.00125411	0.989438	0.997881	1183.67	0.165635	0.0706238	0.218552	1183.67	-0.408751	1.14e-05
DMAP1	164.459	-0.166333	0.291859	1	164.459	0.0249631	0.875017	0.993238	164.459	0.146521	0.381622	0.739647	164.459	0.3277	0.0512945	0.17536	164.459	0.816541	1.15e-05
ADNP2	90.174	0.0817085	0.703087	1	90.174	0.0169505	0.933123	0.99546	90.174	0.060011	0.790158	0.939128	90.174	0.71994	0.000446791	0.00564135	90.174	0.956766	1.15e-05
CDCA2	627.455	-0.0490478	0.643179	1	627.455	0.145849	0.161918	0.839905	627.455	-0.10915	0.324763	0.699812	627.455	0.607344	9.01e-09	8.23e-07	627.455	0.483733	1.16e-05
SNHG8	2288.95	0.231715	0.100837	1	2288.95	0.507937	0.000299979	0.103916	2288.95	0.508095	0.000337067	0.0294265	2288.95	0.563883	5.52e-05	0.00106772	2288.95	0.613414	1.16e-05
TMEM19	113.771	-0.0481764	0.82672	1	113.771	0.0155085	0.942991	0.995608	113.771	-0.0439368	0.850504	0.959874	113.771	0.616591	0.00568554	0.037135	113.771	1.04725	1.17e-05
ARPC1B	226.043	-0.0526139	0.715452	1	226.043	-0.163424	0.248732	0.893003	226.043	-0.109564	0.468987	0.800288	226.043	-0.223451	0.136132	0.334707	226.043	-0.74548	1.18e-05
PRPSAP1	563.315	-0.0738517	0.497928	1	563.315	-0.105124	0.326298	0.933373	563.315	-0.113778	0.316496	0.692221	563.315	-0.618877	2.45e-08	1.86e-06	563.315	-0.515904	1.18e-05
TOMM22	1215.38	0.0761946	0.430838	1	1215.38	0.070564	0.458079	0.961004	1215.38	0.0623766	0.525478	0.834755	1215.38	0.370794	0.000104762	0.00176539	1215.38	0.431459	1.18e-05
TPTEP2	47.0518	-0.0553591	0.896446	1	47.0518	-0.372835	0.362936	0.94012	47.0518	0.204441	0.628781	0.879829	47.0518	-0.355771	0.377084	0.615107	47.0518	-1.90596	1.25e-05
LRP5	73.601	-0.320925	0.231024	1	73.601	-0.432168	0.107159	0.775887	73.601	0.300045	0.298875	0.67971	73.601	-1.37159	4.22e-06	0.000138302	73.601	-1.38798	1.25e-05
ACTR6	92.9041	-0.0507561	0.798586	1	92.9041	-0.0855415	0.650019	0.986879	92.9041	0.482202	0.019294	0.219465	92.9041	-0.226052	0.235372	0.468391	92.9041	-0.901144	1.25e-05
LOC107985944	16.9813	-0.132434	0.795242	1	16.9813	0.392052	0.462362	0.961004	16.9813	-0.522931	0.347486	0.717375	16.9813	0.54163	0.32851	0.570396	16.9813	3.88671	1.25e-05
TMEM143	337.858	-0.238166	0.17301	1	337.858	0.0467813	0.788593	0.99209	337.858	0.36404	0.0415712	0.301512	337.858	-0.653955	0.000164838	0.00250464	337.858	-0.763025	1.27e-05
CYTB	375008	-0.0968165	0.297511	1	375008	-0.0870348	0.348988	0.94012	375008	-0.0496351	0.593315	0.867045	375008	0.19973	0.0316253	0.126414	375008	0.405409	1.29e-05
TOR1A	815.71	0.0723337	0.530204	1	815.71	0.144049	0.207253	0.869288	815.71	0.0398355	0.735465	0.920693	815.71	0.329348	0.00422075	0.0300248	815.71	0.52255	1.3e-05
PAK3	96.5057	0.1397	0.581418	1	96.5057	0.211892	0.393232	0.941267	96.5057	0.195322	0.468858	0.800288	96.5057	-0.852582	0.000729491	0.00811998	96.5057	-1.10374	1.31e-05
PSMD11	1538.55	-0.0340802	0.653916	1	1538.55	0.18091	0.0158733	0.508168	1538.55	0.0360349	0.644116	0.885456	1538.55	0.32138	2.47e-05	0.000573554	1538.55	0.34775	1.32e-05
LSG1	368.334	-0.0219655	0.86079	1	368.334	0.00756386	0.950204	0.996049	368.334	0.0841071	0.525975	0.834889	368.334	0.525539	2.79e-05	0.000631187	368.334	0.588462	1.36e-05
JCAD	42.3401	0.0331381	0.901772	1	42.3401	-0.132184	0.615077	0.98449	42.3401	-0.720245	0.0176396	0.207707	42.3401	-0.453923	0.109536	0.290695	42.3401	-1.44962	1.37e-05
KCNK1	98.8309	-0.223906	0.301565	1	98.8309	-0.172061	0.405351	0.943795	98.8309	-0.140324	0.540428	0.842915	98.8309	-0.587146	0.00574004	0.0374572	98.8309	-0.940417	1.39e-05
INTS6	135.826	-0.2237	0.291357	1	135.826	0.365585	0.0757432	0.735074	135.826	0.0974998	0.659349	0.890766	135.826	0.97228	2.54e-06	9.22e-05	135.826	0.930896	1.4e-05
LOC105371622	222.661	0.271544	0.248921	1	222.661	-0.0548921	0.813081	0.99209	222.661	0.0817656	0.730742	0.918035	222.661	0.0540742	0.814692	0.914249	222.661	1.01377	1.41e-05
GS1-124K5.4	95.971	0.0316801	0.912237	1	95.971	-0.0435338	0.871359	0.993238	95.971	-0.241438	0.398682	0.751248	95.971	0.530398	0.0396873	0.147178	95.971	1.14999	1.43e-05
TRIM52	372.678	-0.0450312	0.777308	1	372.678	-0.103334	0.50793	0.968306	372.678	-0.272673	0.0965327	0.434649	372.678	0.392882	0.0113871	0.0620332	372.678	0.679082	1.45e-05
PNISR	5345.24	0.052664	0.541276	1	5345.24	0.0876818	0.307722	0.924963	5345.24	-0.229915	0.00807366	0.148332	5345.24	-0.136773	0.111527	0.294499	5345.24	-0.373609	1.51e-05
RAB3GAP2	644.549	0.126832	0.242509	1	644.549	0.158323	0.13567	0.815709	644.549	-0.243985	0.0292587	0.260762	644.549	-0.587176	7.42e-08	4.75e-06	644.549	-0.493456	1.53e-05
SPOUT1	218.404	-0.0642289	0.68814	1	218.404	0.0261767	0.868728	0.993238	218.404	0.510163	0.00237557	0.082974	218.404	0.0722884	0.652727	0.821906	218.404	0.745663	1.53e-05
GOLGA4	619.291	-0.102628	0.4953	1	619.291	-0.0237513	0.872685	0.993238	619.291	-0.25764	0.094235	0.428806	619.291	-0.11165	0.456172	0.683272	619.291	-0.658236	1.54e-05
UBC	3534.44	0.0336678	0.664501	1	3534.44	0.0371846	0.627973	0.986217	3534.44	0.0520733	0.504849	0.824614	3534.44	-0.0268929	0.724604	0.86694	3534.44	-0.333612	1.54e-05
MTFR1	475.075	0.160554	0.20173	1	475.075	0.0253579	0.835115	0.99256	475.075	-0.17412	0.178494	0.558327	475.075	-0.191377	0.119881	0.30903	475.075	-0.555738	1.56e-05
FAM117B	96.2648	-0.0554273	0.785248	1	96.2648	0.00786081	0.96848	0.998141	96.2648	0.0386834	0.856251	0.96189	96.2648	0.165569	0.429402	0.662108	96.2648	0.974421	1.56e-05
MAD2L2	1366.53	-0.0139289	0.897706	1	1366.53	-0.00156503	0.988385	0.999254	1366.53	0.254916	0.0207232	0.226512	1366.53	0.283626	0.0084249	0.0503208	1366.53	0.473302	1.58e-05
TP73-AS1	420.347	-0.191991	0.159055	1	420.347	0.0538119	0.691011	0.988849	420.347	-0.184877	0.195423	0.580795	420.347	0.16041	0.244027	0.478694	420.347	0.641096	1.58e-05
ADAT3	49.5413	-0.247985	0.358986	1	49.5413	0.0774383	0.775159	0.99209	49.5413	0.0650458	0.832636	0.954477	49.5413	0.253515	0.375436	0.613865	49.5413	1.37538	1.58e-05
TMEM30A	645.134	0.139346	0.205579	1	645.134	-0.0257063	0.810114	0.99209	645.134	-0.135268	0.227677	0.617482	645.134	-0.273748	0.0108746	0.0599029	645.134	-0.468484	1.61e-05
HSD17B11	695.81	-0.0428333	0.621611	1	695.81	-0.129714	0.118578	0.794825	695.81	-0.0908409	0.316819	0.692221	695.81	-0.0144625	0.859402	0.935578	695.81	-0.356419	1.64e-05
CDCA7L	288.305	-0.165721	0.244398	1	288.305	-0.051142	0.710136	0.99209	288.305	-0.159826	0.271588	0.656197	288.305	-0.484166	0.000373906	0.00488871	288.305	-0.624452	1.68e-05
KIZ	175.346	-0.233894	0.157217	1	175.346	-0.029792	0.847055	0.992693	175.346	-0.17762	0.296546	0.677859	175.346	-0.112279	0.474295	0.697823	175.346	-0.698406	1.7e-05
POLR2J	1288.41	0.0230543	0.832842	1	1288.41	0.0378125	0.727592	0.99209	1288.41	0.400482	0.000282552	0.0264561	1288.41	0.372131	0.000617646	0.00717754	1288.41	0.473952	1.7e-05
ARF1	2931.02	0.020212	0.805358	1	2931.02	-0.0317583	0.695988	0.988849	2931.02	0.0214853	0.796103	0.941524	2931.02	0.12261	0.12974	0.324876	2931.02	-0.348191	1.71e-05
YTHDF1	394.236	-0.0513473	0.70037	1	394.236	0.0564799	0.667581	0.986951	394.236	0.106232	0.441744	0.782398	394.236	0.693475	2.2e-07	1.18e-05	394.236	0.601124	1.71e-05
CLVS2	17.1166	-0.482988	0.34553	1	17.1166	1.07445	0.0219336	0.545405	17.1166	0.739945	0.115075	0.463971	17.1166	0.485038	0.284985	0.524045	17.1166	-2.16469	1.75e-05
RPL35	3691.51	0.0940362	0.35384	1	3691.51	0.116551	0.247752	0.892517	3691.51	0.0837558	0.410792	0.760457	3691.51	0.219192	0.0293591	0.12037	3691.51	0.432732	1.78e-05
IMPACT	628.271	0.23726	0.063475	1	628.271	0.131377	0.291945	0.915766	628.271	-0.075759	0.558743	0.852028	628.271	0.416015	0.000733682	0.00814791	628.271	0.546957	1.78e-05
FOXM1	431.275	-0.135659	0.312286	1	431.275	-0.238225	0.0750151	0.734158	431.275	-0.0589427	0.670912	0.895878	431.275	-0.0711732	0.603136	0.791361	431.275	0.614043	1.78e-05
SKOR1	41.2178	-1.17218	0.00763688	1	41.2178	0.366857	0.40775	0.944969	41.2178	-0.517181	0.252842	0.640888	41.2178	-0.0413211	0.925121	0.966863	41.2178	-2.15362	1.79e-05
ITGB1BP1	1636.36	0.00518742	0.96153	1	1636.36	-0.0844739	0.427983	0.948856	1636.36	-0.0137921	0.89924	0.974282	1636.36	0.372986	0.000491537	0.00609741	1636.36	0.466197	1.79e-05
KIAA0753	159.119	-0.0573685	0.792694	1	159.119	-0.234124	0.275357	0.904907	159.119	0.110672	0.627979	0.87942	159.119	0.670744	0.00205725	0.0176931	159.119	1.00813	1.8e-05
ELOVL5	149.597	0.233571	0.187843	1	149.597	-0.158672	0.351078	0.94012	149.597	-0.651188	0.000519242	0.0373638	149.597	-0.249739	0.149956	0.353728	149.597	-0.791298	1.81e-05
DLG1	368.181	0.0548216	0.617809	1	368.181	-0.0152482	0.884488	0.993238	368.181	-0.35562	0.00233213	0.0826213	368.181	-0.221648	0.0406821	0.149759	368.181	-0.498226	1.83e-05
PAXX	249.975	0.0436688	0.760835	1	249.975	0.176894	0.213442	0.873529	249.975	0.41178	0.00526221	0.123341	249.975	0.641984	8.52e-06	0.000248017	249.975	0.654904	1.9e-05
UBXN8	101.295	0.263585	0.236622	1	101.295	0.495393	0.0243103	0.555722	101.295	0.51381	0.0245654	0.242497	101.295	0.915875	1.44e-05	0.000372557	101.295	0.953895	1.9e-05
MBNL1-AS1	56.9915	-0.0736156	0.836424	1	56.9915	-0.0386267	0.911313	0.993238	56.9915	0.561276	0.129343	0.488074	56.9915	0.42538	0.222955	0.453005	56.9915	1.68293	1.9e-05
DBNL	339.077	0.0163201	0.903293	1	339.077	0.036373	0.783624	0.99209	339.077	0.198424	0.151125	0.518072	339.077	0.161929	0.24505	0.479858	339.077	0.736367	1.91e-05
LOC107984875	76.9049	0.503806	0.0686582	1	76.9049	0.400919	0.135318	0.814612	76.9049	-0.0086278	0.975602	0.99388	76.9049	-0.155417	0.550146	0.754335	76.9049	1.091	1.92e-05
LOC648987	22.9388	0.355454	0.46592	1	22.9388	0.421273	0.369274	0.94012	22.9388	0.608567	0.244151	0.632789	22.9388	0.253738	0.610518	0.795656	22.9388	2.32466	1.92e-05
LOC105378644	12.6268	1.62789	0.197868	1	12.6268	3.23876	0.0304359	0.586954	12.6268	-0.541802	0.634086	0.882071	12.6268	2.86331	0.00943611	0.0545657	12.6268	5.77643	1.92e-05
PHLDA3	212.422	0.193477	0.326013	1	212.422	0.0958076	0.621946	0.986217	212.422	0.593368	0.00331659	0.0995347	212.422	0.516411	0.00704046	0.0439681	212.422	0.847611	1.94e-05
LRRC4B	73.539	-0.0730624	0.741674	1	73.539	-0.551777	0.0106607	0.476907	73.539	-0.104672	0.655179	0.889152	73.539	-1.05406	5.55e-06	0.00017606	73.539	-0.962305	1.96e-05
MRPS30	362.662	0.0419118	0.733592	1	362.662	0.223721	0.0601997	0.700515	362.662	0.357257	0.00459925	0.116998	362.662	0.571683	6.27e-07	2.86e-05	362.662	0.512264	1.98e-05
FIBP	483.116	-0.471547	0.00209926	0.932713	483.116	0.00166517	0.991294	0.999254	483.116	0.228551	0.146066	0.510957	483.116	0.261181	0.0922343	0.259802	483.116	0.694348	1.99e-05
PTCD2	106.378	0.30304	0.240242	1	106.378	-0.0309574	0.899697	0.993238	106.378	0.0739109	0.777455	0.935036	106.378	0.783824	0.00123448	0.0121491	106.378	1.0755	1.99e-05
C19orf73	72.3245	-0.300826	0.247318	1	72.3245	0.464131	0.0596706	0.69977	72.3245	0.391719	0.135822	0.496204	72.3245	0.142274	0.542136	0.749138	72.3245	1.07232	2.01e-05
CCDC15-DT	17.0738	-0.420935	0.545514	1	17.0738	0.763624	0.230583	0.882374	17.0738	0.547584	0.405051	0.755946	17.0738	1.50917	0.0110159	0.0605264	17.0738	2.74042	2.02e-05
PRPF40B	86.154	-0.252414	0.323467	1	86.154	0.285984	0.263782	0.899985	86.154	-0.336562	0.198744	0.584168	86.154	-0.757488	0.00366912	0.0269863	86.154	-1.21313	2.03e-05
WDR66	9.8736	0.327215	0.611385	1	9.8736	-1.71457	0.0125219	0.484729	9.8736	0.750862	0.262563	0.648033	9.8736	1.21443	0.0660562	0.208594	9.8736	3.04854	2.03e-05
ST3GAL5	168.102	0.176441	0.38821	1	168.102	-0.216241	0.287508	0.913805	168.102	-0.433027	0.0435531	0.308021	168.102	-0.756479	0.000290645	0.0039867	168.102	-0.912988	2.04e-05
FGFR1	864.372	0.0127262	0.922003	1	864.372	-0.272248	0.0354565	0.613338	864.372	0.271288	0.0398675	0.295588	864.372	-0.41492	0.0015993	0.0146142	864.372	-0.580056	2.07e-05
ZMPSTE24	247.667	-0.0693128	0.646201	1	247.667	0.257205	0.0803355	0.743994	247.667	0.214681	0.172624	0.550562	247.667	0.802591	9.96e-08	6.1e-06	247.667	0.698012	2.07e-05
VPS9D1-AS1	639.436	-0.0145731	0.916169	1	639.436	0.0184431	0.89405	0.993238	639.436	0.180946	0.202738	0.587534	639.436	0.435759	0.0026216	0.0211917	639.436	0.757898	2.1e-05
FAM214A	95.7888	-0.134896	0.573507	1	95.7888	-0.317092	0.176142	0.852901	95.7888	0.0755347	0.772148	0.933661	95.7888	1.32752	5.95e-09	5.84e-07	95.7888	1.00787	2.1e-05
TJAP1	411.92	0.197479	0.147721	1	411.92	0.503647	0.000190214	0.071383	411.92	0.16239	0.241609	0.631148	411.92	0.439672	0.00121417	0.0120061	411.92	0.619099	2.13e-05
C19orf53	1248.01	0.0331767	0.773993	1	1248.01	0.00719481	0.949952	0.996049	1248.01	0.252407	0.0303819	0.265594	1248.01	0.291892	0.010639	0.0589631	1248.01	0.490555	2.16e-05
ALG1	142.115	0.014603	0.945749	1	142.115	0.000913995	0.996516	0.999327	142.115	-0.0612456	0.782209	0.935804	142.115	0.385877	0.0716893	0.220392	142.115	1.0274	2.18e-05
MORN4	687.372	-0.229753	0.0694257	1	687.372	-0.0844838	0.497452	0.964518	687.372	0.119907	0.350332	0.719886	687.372	-0.389676	0.00184497	0.0162622	687.372	-0.541149	2.19e-05
MRPL47	4452.56	-0.0114807	0.925603	1	4452.56	0.158536	0.195147	0.86414	4452.56	0.0299528	0.808078	0.946452	4452.56	0.526494	1.64e-05	0.000413675	4452.56	0.519555	2.19e-05
BMS1P20	388.26	0.0940206	0.500017	1	388.26	0.177877	0.190667	0.863591	388.26	0.149342	0.29724	0.678514	388.26	0.341942	0.00979477	0.0559712	388.26	0.560212	2.23e-05
ZNF551	74.7296	-0.362465	0.167105	1	74.7296	-0.0101307	0.969005	0.998141	74.7296	0.163947	0.543843	0.844535	74.7296	0.517461	0.0562724	0.186709	74.7296	1.35836	2.25e-05
PGAM5	701.528	0.0380081	0.788604	1	701.528	0.0950307	0.497715	0.964518	701.528	0.086749	0.546862	0.846438	701.528	0.596981	2.21e-05	0.000523081	701.528	0.613474	2.3e-05
COL6A2	182.164	-0.197552	0.192034	1	182.164	-0.0883096	0.551747	0.975959	182.164	0.0810343	0.606046	0.87102	182.164	-0.519097	0.000646148	0.00743365	182.164	-0.681347	2.32e-05
ZNF37BP	236.512	0.0175821	0.913733	1	236.512	0.124971	0.4339	0.951072	236.512	-0.0400603	0.811555	0.947993	236.512	0.135782	0.412334	0.647451	236.512	0.786392	2.33e-05
P3H4	559.026	0.114904	0.325462	1	559.026	-0.207665	0.0728458	0.730636	559.026	-0.00559565	0.962982	0.990261	559.026	-0.559875	2.41e-06	8.86e-05	559.026	-0.520208	2.34e-05
RANGRF	303.795	-0.00797785	0.94885	1	303.795	0.191097	0.121656	0.805537	303.795	0.137468	0.295325	0.676735	303.795	0.295562	0.0187305	0.0877677	303.795	0.583933	2.34e-05
ZNF252P	488.134	-0.112608	0.633936	1	488.134	0.45633	0.0528509	0.687896	488.134	0.234205	0.329259	0.702881	488.134	0.14464	0.54158	0.748667	488.134	1.02181	2.35e-05
TES	1127.73	0.0732086	0.423694	1	1127.73	0.0026718	0.976146	0.998995	1127.73	-0.182543	0.0505665	0.329419	1127.73	-0.120526	0.180001	0.397974	1127.73	-0.38837	2.37e-05
SCAF1	566.012	0.101361	0.560137	1	566.012	0.17227	0.321954	0.930927	566.012	0.164284	0.352358	0.721061	566.012	0.134771	0.439955	0.670958	566.012	0.757216	2.43e-05
CLTB	1321.64	-0.0555801	0.658768	1	1321.64	-0.114142	0.360661	0.94012	1321.64	0.136336	0.283293	0.666549	1321.64	0.433068	0.00053669	0.00649122	1321.64	0.535673	2.46e-05
MCIDAS	25.9928	0.0269799	0.944709	1	25.9928	0.310001	0.4081	0.944969	25.9928	-0.169637	0.686938	0.902313	25.9928	-0.965125	0.0283931	0.117613	25.9928	2.54535	2.49e-05
SQLE	285.099	-0.0584806	0.7923	1	285.099	-0.333274	0.130803	0.811619	285.099	-0.0215812	0.924341	0.980493	285.099	-0.485455	0.029396	0.120385	285.099	-0.96031	2.5e-05
CCDC137	829.134	0.0928211	0.336573	1	829.134	0.252844	0.00755677	0.438163	829.134	0.23113	0.0189314	0.216361	829.134	0.45759	1.71e-06	6.56e-05	829.134	0.42993	2.53e-05
ZNF316	92.4474	-0.241757	0.398133	1	92.4474	0.111817	0.692464	0.988849	92.4474	0.539788	0.0640457	0.36433	92.4474	0.777669	0.00648201	0.0412973	92.4474	1.27925	2.55e-05
NRXN3	118.602	-0.0904004	0.632709	1	118.602	-0.156206	0.411556	0.944969	118.602	-0.620402	0.00214401	0.0787012	118.602	-0.541135	0.00760984	0.0467402	118.602	-0.962123	2.57e-05
FAM174C	181.529	0.341112	0.0439564	1	181.529	-0.0975937	0.554807	0.976023	181.529	0.253213	0.14908	0.515501	181.529	0.454884	0.00699938	0.0437796	181.529	0.789184	2.57e-05
IFT20	278.404	0.152581	0.389765	1	278.404	0.216155	0.209662	0.871549	278.404	-0.499937	0.007278	0.141402	278.404	0.0384801	0.823722	0.91886	278.404	-0.716399	2.6e-05
HPCAL1	645.103	0.109847	0.3132	1	645.103	-0.157435	0.145402	0.825024	645.103	-0.135723	0.231649	0.620887	645.103	-0.486201	1.05e-05	0.000292074	645.103	-0.495126	2.61e-05
UBE2A	1645.57	0.0325886	0.753102	1	1645.57	0.11039	0.282375	0.909604	1645.57	-0.0196972	0.851102	0.960072	1645.57	0.44988	1.27e-05	0.000333777	1645.57	0.44159	2.62e-05
PTMA	3134.36	-0.136862	0.105716	1	3134.36	-0.0587587	0.484783	0.964518	3134.36	-0.107339	0.209521	0.595898	3134.36	-0.0270469	0.749129	0.881335	3134.36	-0.364523	2.64e-05
PGBD4	33.4454	-0.147904	0.639065	1	33.4454	0.502184	0.0988448	0.760283	33.4454	0.440674	0.209092	0.595222	33.4454	0.683931	0.0206651	0.0943829	33.4454	1.43261	2.65e-05
LOC101927420	31.7766	0.655216	0.16877	1	31.7766	0.530245	0.266015	0.899985	31.7766	-0.503416	0.347392	0.717375	31.7766	-0.253326	0.535834	0.744506	31.7766	1.75676	2.65e-05
RPRD2	602.292	0.111501	0.365705	1	602.292	0.0936114	0.441045	0.954892	602.292	0.18205	0.146889	0.512207	602.292	0.510175	2.73e-05	0.000620892	602.292	0.529479	2.67e-05
FBXO4	212.294	0.328289	0.0293517	1	212.294	0.361065	0.012406	0.481812	212.294	0.379348	0.0126597	0.180375	212.294	0.333921	0.0200943	0.0925166	212.294	0.670059	2.67e-05
LONRF3	697.566	0.030305	0.789546	1	697.566	0.0831222	0.454322	0.960165	697.566	-0.134162	0.246519	0.634905	697.566	-0.296943	0.00832183	0.0498486	697.566	-0.49354	2.72e-05
TSIX	1221.8	-0.303684	0.211874	1	1221.8	-0.475586	0.0502861	0.682802	1221.8	-1.1408	3.36e-06	0.00134959	1221.8	-0.55081	0.0231759	0.102175	1221.8	-1.02524	2.73e-05
LRP11	134.811	-0.227265	0.246013	1	134.811	0.135853	0.471909	0.961004	134.811	-0.326143	0.104457	0.446851	134.811	-0.228839	0.214985	0.443778	134.811	-0.843326	2.73e-05
ATP2C1	367.571	0.0557562	0.653061	1	367.571	-0.161064	0.17782	0.853717	367.571	-0.466736	0.000374923	0.030833	367.571	-0.217582	0.0762187	0.229073	367.571	-0.543594	2.73e-05
MSRB2	1825.03	-0.127465	0.44779	1	1825.03	-0.317411	0.057988	0.69925	1825.03	-0.134023	0.426584	0.773313	1825.03	-0.554023	0.000958625	0.00995353	1825.03	-0.706319	2.8e-05
MYBBP1A	190.07	-0.0708377	0.649941	1	190.07	-0.103831	0.503755	0.968194	190.07	0.267601	0.0963664	0.434026	190.07	0.533695	0.00128392	0.012559	190.07	0.850235	2.82e-05
RBPJ	1589.59	0.0912012	0.414228	1	1589.59	-0.0882296	0.425208	0.948274	1589.59	-0.145551	0.19738	0.581919	1589.59	-0.320903	0.00361715	0.0267938	1589.59	-0.464175	2.83e-05
SH3KBP1	471.525	-0.0533543	0.733566	1	471.525	-0.305062	0.0497406	0.682802	471.525	-0.332391	0.0388443	0.292376	471.525	-0.331476	0.0345316	0.13394	471.525	-0.694556	2.84e-05
PHF10	1892.75	0.139621	0.120828	1	1892.75	-0.0616574	0.489176	0.964518	1892.75	-0.202433	0.0262085	0.249872	1892.75	-0.157352	0.0808971	0.238212	1892.75	-0.389177	2.85e-05
WDR41	432.702	-0.013961	0.888176	1	432.702	-0.12533	0.185336	0.85813	432.702	-0.19605	0.0616876	0.357924	432.702	-0.119107	0.204579	0.429873	432.702	-0.41891	2.88e-05
TMEM68	322.366	0.024116	0.870035	1	322.366	0.110349	0.42975	0.949124	322.366	0.0716715	0.629516	0.880055	322.366	0.0137774	0.919172	0.964384	322.366	0.577625	2.92e-05
ZKSCAN2	139.231	0.0314269	0.881949	1	139.231	0.43146	0.0344595	0.605394	139.231	0.115786	0.589035	0.865328	139.231	0.329735	0.109425	0.290579	139.231	0.95518	2.92e-05
PALM	229.096	-0.0811871	0.562067	1	229.096	-0.258668	0.0594027	0.69977	229.096	0.0501403	0.731037	0.918035	229.096	-1.01734	1.13e-12	3.55e-10	229.096	-0.606251	2.94e-05
LOC645967	9.49062	-0.898736	0.20499	1	9.49062	0.869802	0.214342	0.875114	9.49062	-0.978645	0.201649	0.586715	9.49062	0.749018	0.265283	0.5025	9.49062	4.97563	2.94e-05
FOXP1	1283.22	-0.0719015	0.528136	1	1283.22	-0.0753536	0.50457	0.968194	1283.22	-0.110987	0.335293	0.707915	1283.22	-0.318217	0.0054708	0.0361222	1283.22	0.484506	2.96e-05
CRYBB2P1	136.85	0.242734	0.134022	1	136.85	0.186086	0.237935	0.88631	136.85	0.156213	0.368012	0.730098	136.85	0.398315	0.0158676	0.0779216	136.85	0.812179	2.97e-05
ERI2	182.886	-0.255257	0.121515	1	182.886	0.188472	0.229561	0.882374	182.886	-0.0124704	0.942981	0.985157	182.886	0.803593	1.36e-07	7.88e-06	182.886	0.667699	2.98e-05
POLR3C	181.872	0.235962	0.321615	1	181.872	0.0331645	0.886636	0.993238	181.872	0.340539	0.160286	0.529492	181.872	0.957408	5.19e-05	0.0010166	181.872	1.01802	3.1e-05
THORLNC	12.3617	-0.829459	0.212073	1	12.3617	0.849159	0.193526	0.863666	12.3617	-1.4548	0.0768654	0.394326	12.3617	1.91206	0.00233414	0.0193969	12.3617	2.7569	3.1e-05
TCAF2	20.8218	0.740828	0.142023	1	20.8218	-0.67649	0.147179	0.827803	20.8218	0.619251	0.24502	0.633741	20.8218	-1.04904	0.0231603	0.102175	20.8218	-2.37155	3.12e-05
QPRT	931.722	0.161783	0.27021	1	931.722	0.0531466	0.713424	0.99209	931.722	-0.260637	0.0773708	0.394721	931.722	-0.21108	0.141529	0.342357	931.722	-0.601583	3.12e-05
DHRS3	214.635	0.0631792	0.755027	1	214.635	-0.0338891	0.862773	0.993238	214.635	0.0606334	0.762314	0.930158	214.635	-0.863749	1.31e-05	0.000342787	214.635	-0.846727	3.15e-05
ZYG11B	335.671	0.0129533	0.9315	1	335.671	0.290314	0.0491625	0.682386	335.671	-0.361362	0.0206627	0.226169	335.671	-0.510402	0.00098254	0.010109	335.671	-0.65857	3.16e-05
YLPM1	342.856	-0.031036	0.799423	1	342.856	-0.118922	0.327993	0.934093	342.856	-0.182916	0.161374	0.530731	342.856	-0.0651475	0.609201	0.794997	342.856	0.599126	3.16e-05
TNKS2-AS1	9.3188	-0.11572	0.85966	1	9.3188	0.244945	0.734607	0.99209	9.3188	1.00717	0.145587	0.509695	9.3188	1.706	0.00448934	0.0313369	9.3188	2.86559	3.17e-05
ARHGAP28	26.537	0.112306	0.744672	1	26.537	-0.0942234	0.771709	0.99209	26.537	0.627639	0.094059	0.428601	26.537	-1.10397	0.00219571	0.0186084	26.537	-1.67381	3.19e-05
SLC25A13	1586.14	0.0397825	0.752656	1	1586.14	-0.0333764	0.790724	0.99209	1586.14	-0.224533	0.0788332	0.398084	1586.14	0.0990191	0.433804	0.665541	1586.14	0.54376	3.2e-05
TIGD1	138.052	0.121848	0.56273	1	138.052	0.417798	0.0399606	0.641207	138.052	0.217023	0.303832	0.683538	138.052	0.614313	0.00172797	0.015418	138.052	0.831478	3.2e-05
GSPT2	41.7128	0.174944	0.681413	1	41.7128	-1.05311	0.0104725	0.473189	41.7128	-0.272058	0.546299	0.846431	41.7128	0.940973	0.0259873	0.110799	41.7128	1.8862	3.2e-05
INPP5E	213.365	0.271396	0.0864577	1	213.365	0.0529358	0.739869	0.99209	213.365	-0.259608	0.128125	0.486407	213.365	0.0854292	0.597688	0.787589	213.365	0.725327	3.23e-05
ZAR1L	8.53671	-2.83389	0.038156	1	8.53671	0.864371	0.389047	NA	8.53671	3.27162	0.00155811	0.0648063	8.53671	2.90863	0.00142878	0.0134681	8.53671	5.45109	3.23e-05
LYRM1	120.439	0.188389	0.422159	1	120.439	0.091205	0.682863	0.987729	120.439	-0.191559	0.421313	0.770136	120.439	-0.591739	0.00850864	0.0506336	120.439	-0.981011	3.24e-05
ZKSCAN4	114.471	0.291993	0.187088	1	114.471	0.0268258	0.898253	0.993238	114.471	0.156796	0.479614	0.807031	114.471	0.462996	0.0259355	0.110682	114.471	0.863123	3.24e-05
CCDC71L	101.973	-0.148367	0.550908	1	101.973	0.00533329	0.982373	0.999254	101.973	0.0681931	0.790463	0.939128	101.973	-0.0234689	0.924083	0.966449	101.973	1.04274	3.27e-05
H2AC16	4.61508	0.665102	0.535803	1	4.61508	0.0911087	0.929885	NA	4.61508	0.630965	0.554942	0.850098	4.61508	0.141687	0.890126	NA	4.61508	6.18092	3.33e-05
NME3	672.888	-0.11568	0.275945	1	672.888	0.0798656	0.445397	0.956047	672.888	0.0731256	0.500481	0.821293	672.888	-0.14386	0.178335	0.395435	672.888	-0.462405	3.36e-05
MAN1B1-DT	27.1136	0.157313	0.72832	1	27.1136	0.808529	0.0689754	0.722955	27.1136	1.27941	0.00674513	0.135277	27.1136	0.748666	0.0883967	0.252816	27.1136	2.01945	3.36e-05
NOL8	819.678	-0.112735	0.430434	1	819.678	0.0184685	0.896717	0.993238	819.678	-0.063927	0.661148	0.891196	819.678	0.449744	0.0017179	0.0153376	819.678	0.627751	3.37e-05
SLC44A1	271.907	0.0946722	0.576106	1	271.907	0.0528983	0.749104	0.99209	271.907	-0.731261	3.38e-05	0.00786758	271.907	-0.221136	0.187194	0.407306	271.907	-0.74246	3.38e-05
OSTC	976.232	-0.0571912	0.685202	1	976.232	0.213876	0.123143	0.806541	976.232	-0.36061	0.0116401	0.174804	976.232	0.056287	0.684029	0.842194	976.232	-0.576281	3.4e-05
HSPA14	563.532	0.0718639	0.469729	1	563.532	0.235246	0.0149048	0.503273	563.532	0.078323	0.451722	0.788713	563.532	0.375951	0.000102049	0.00173416	563.532	0.4277	3.43e-05
CRYAB	9.9983	2.94439	0.0823452	1	9.9983	3.88533	0.0219673	0.545405	9.9983	-0.83277	0.613302	0.873025	9.9983	0.408856	0.734178	0.871758	9.9983	-6.34116	3.46e-05
P3H1	123.526	0.171333	0.369568	1	123.526	-0.483804	0.00901661	0.462138	123.526	0.0260141	0.896002	0.972721	123.526	-0.232156	0.230598	0.462661	123.526	-0.857889	3.46e-05
LLPH	282.476	0.0294787	0.829332	1	282.476	0.286057	0.0319863	0.593527	282.476	0.141896	0.31478	0.690269	282.476	0.569793	3.71e-05	0.000783779	282.476	0.627454	3.46e-05
NCAM1	173.673	-0.307593	0.0459709	1	173.673	-0.0507237	0.737929	0.99209	173.673	0.445028	0.00539264	0.123808	173.673	-0.229952	0.132087	0.328432	173.673	-0.673059	3.5e-05
LIG3	167.984	0.103897	0.554005	1	167.984	0.0348567	0.838258	0.992693	167.984	-0.390529	0.0332464	0.274146	167.984	-0.314693	0.0722856	0.22157	167.984	-0.800228	3.52e-05
DDHD2	665.035	0.120767	0.240425	1	665.035	-0.0851562	0.392635	0.941267	665.035	-0.204223	0.0529087	0.335383	665.035	-0.479313	1.66e-06	6.46e-05	665.035	-0.430854	3.52e-05
ZNF395	337.776	0.0407604	0.791573	1	337.776	-0.0426073	0.777714	0.99209	337.776	-0.557306	0.000416455	0.0327957	337.776	-0.716152	2.93e-06	0.000104088	337.776	-0.661159	3.53e-05
C9orf116	193.145	0.116177	0.576026	1	193.145	0.152166	0.462191	0.961004	193.145	0.244375	0.255049	0.64354	193.145	0.499866	0.0176656	0.0841072	193.145	0.932013	3.57e-05
SEPHS2	1100.6	-0.107268	0.518555	1	1100.6	-0.149293	0.3668	0.94012	1100.6	-0.137277	0.414693	0.763966	1100.6	0.149142	0.369549	0.608192	1100.6	0.695973	3.59e-05
VTI1B	558.487	-0.106936	0.378588	1	558.487	-0.0234164	0.843934	0.992693	558.487	-0.212527	0.0915797	0.422757	558.487	-0.0768566	0.521794	0.733802	558.487	-0.51659	3.64e-05
ODC1	437.534	-0.0264276	0.848594	1	437.534	-0.166952	0.21758	0.877503	437.534	-0.0592579	0.679255	0.898754	437.534	0.335496	0.015382	0.0762746	437.534	0.60753	3.66e-05
LINC00174	81.042	0.0153697	0.957823	1	81.042	0.203658	0.469966	0.961004	81.042	-0.951356	0.00132611	0.0606166	81.042	0.432788	0.116383	0.303134	81.042	1.23355	3.66e-05
H2BC12	3128.6	0.037777	0.794337	1	3128.6	-0.000805517	0.995548	0.999254	3128.6	-0.0167303	0.908483	0.976129	3128.6	0.663588	4.15e-06	0.000137442	3128.6	0.594566	3.68e-05
HOXB5	721.922	-0.0782241	0.544914	1	721.922	0.0192823	0.880831	0.993238	721.922	0.368944	0.00491003	0.120115	721.922	0.418348	0.00111629	0.0111752	721.922	0.538807	3.7e-05
POPDC3	528.77	0.239117	0.122361	1	528.77	-0.0180789	0.905167	0.993238	528.77	-0.108458	0.494659	0.817867	528.77	-0.222022	0.143881	0.345598	528.77	-0.632776	3.72e-05
LRFN1	516.903	-0.150356	0.382662	1	516.903	0.043729	0.798476	0.99209	516.903	0.335923	0.056123	0.342624	516.903	-0.301316	0.0826602	0.241789	516.903	0.731973	3.73e-05
NEMP2	48.7965	0.780092	0.00802958	1	48.7965	-0.694349	0.014627	0.503273	48.7965	-0.231195	0.474547	0.803527	48.7965	-0.810526	0.00601765	0.0387982	48.7965	-1.33341	3.75e-05
LANCL1	655.476	0.115263	0.289009	1	655.476	-0.16064	0.127865	0.809092	655.476	-0.0875565	0.435554	0.779642	655.476	-0.286125	0.00729911	0.0451755	655.476	-0.452904	3.76e-05
XXYLT1	266.413	-0.000193881	0.999219	1	266.413	-0.3431	0.0803348	0.743994	266.413	-0.123726	0.54249	0.844205	266.413	-0.654083	0.00138458	0.0132231	266.413	-0.895158	3.77e-05
C19orf54	900.057	-0.0927121	0.433403	1	900.057	0.027531	0.814884	0.99209	900.057	0.319681	0.00750397	0.143697	900.057	0.101231	0.388239	0.626841	900.057	0.497353	3.79e-05
ZNF408	39.6719	0.360688	0.206841	1	39.6719	0.520495	0.0560319	0.69925	39.6719	1.06979	0.000418801	0.0327957	39.6719	0.856393	0.001854	0.0163318	39.6719	1.28516	3.8e-05
ICA1	98.3138	-0.0441414	0.888583	1	98.3138	-0.323296	0.295715	0.919782	98.3138	-0.0973993	0.75667	0.927237	98.3138	-0.691944	0.025602	0.109739	98.3138	-1.3093	3.88e-05
POLDIP2	445.215	0.0109132	0.906202	1	445.215	-0.194235	0.0319754	0.593527	445.215	0.230352	0.0193319	0.219465	445.215	0.301834	0.00127984	0.0125276	445.215	0.425249	3.88e-05
TVP23C-CDRT4	49.9451	0.0870543	0.769842	1	49.9451	0.144625	0.604938	0.982653	49.9451	-0.0475752	0.8765	0.969123	49.9451	-0.132061	0.627878	0.806843	49.9451	-1.17305	3.9e-05
APOOL	1199.87	-0.0911307	0.487397	1	1199.87	0.180515	0.165518	0.845718	1199.87	0.224523	0.0908088	0.420779	1199.87	-0.313937	0.0161497	0.0788537	1199.87	-0.544541	3.91e-05
SLC35A4	429.903	0.285824	0.0670306	1	429.903	-0.235068	0.129523	0.811273	429.903	0.26417	0.101149	0.441274	429.903	0.349629	0.0263338	0.111686	429.903	0.685764	3.92e-05
ETV3	76.7582	0.071678	0.734316	1	76.7582	-0.254469	0.21966	0.877892	76.7582	-0.150624	0.505901	0.824967	76.7582	0.41392	0.0397564	0.147397	76.7582	0.857098	3.93e-05
ITPRID2	66.4393	-0.153192	0.607649	1	66.4393	-0.0341741	0.908104	0.993238	66.4393	0.11736	0.706172	0.909667	66.4393	0.991659	0.000807458	0.00878479	66.4393	1.24589	3.96e-05
CTPS2	341.322	-0.105414	0.594621	1	341.322	-0.0456319	0.815947	0.99209	341.322	-0.186316	0.362944	0.727338	341.322	-0.504761	0.0107086	0.0592807	341.322	-0.824268	3.99e-05
GLB1	255.239	-0.130355	0.418293	1	255.239	-0.254101	0.110894	0.777773	255.239	-0.241102	0.156486	0.524146	255.239	-0.372156	0.0222996	0.0994855	255.239	-0.696827	4.03e-05
ZNF3	318.335	0.12362	0.325603	1	318.335	0.466543	0.000162783	0.0673894	318.335	0.444706	0.00073009	0.0434781	318.335	0.820397	1.71e-11	4e-09	318.335	0.522057	4.03e-05
YIF1A	388.89	-0.243867	0.145384	1	388.89	0.0783905	0.636816	0.986225	388.89	0.208825	0.220183	0.608285	388.89	0.115831	0.488136	0.708085	388.89	-0.697764	4.06e-05
COA4	285.859	0.148649	0.219801	1	285.859	0.0855455	0.460279	0.961004	285.859	0.296141	0.0189007	0.216169	285.859	0.286942	0.0149394	0.0748826	285.859	0.519052	4.14e-05
POU2F2	74.3917	0.526621	0.276823	1	74.3917	0.976507	0.0438757	0.656435	74.3917	0.597167	0.220091	0.608264	74.3917	1.50312	0.0013713	0.0131482	74.3917	1.94713	4.18e-05
NIBAN2	1281.88	0.0671627	0.59977	1	1281.88	0.0692902	0.586884	0.981647	1281.88	0.0893715	0.490783	0.814676	1281.88	-0.322123	0.0119852	0.0641004	1281.88	-0.537109	4.19e-05
MFSD5	589.828	-0.0931866	0.527899	1	589.828	0.0703833	0.63058	0.986217	589.828	-0.20538	0.17646	0.55532	589.828	0.45778	0.00202699	0.017514	589.828	0.622799	4.19e-05
MAP7	401.677	-0.318908	0.0445782	1	401.677	-0.101767	0.514549	0.968306	401.677	-0.44329	0.00638261	0.133161	401.677	-0.521775	0.000926594	0.00969021	401.677	-0.65924	4.23e-05
SPA17	664.858	-0.0896323	0.508188	1	664.858	0.019767	0.881099	0.993238	664.858	0.0560897	0.680791	0.899569	664.858	6.34e-05	0.999614	0.99982	664.858	0.539221	4.25e-05
DIRAS1	312.956	-0.280799	0.0636931	1	312.956	-0.305296	0.0426515	0.64963	312.956	0.162528	0.305179	0.6843	312.956	-0.220746	0.149524	0.353091	312.956	-0.66201	4.26e-05
RBM42	454.902	-0.0390348	0.718605	1	454.902	0.153465	0.15368	0.835289	454.902	0.228475	0.0434861	0.308021	454.902	0.26246	0.0168799	0.0815151	454.902	0.477964	4.26e-05
LOC102723963	3.63279	1.00901	0.444056	1	3.63279	0.934107	0.456111	NA	3.63279	0.365696	0.80285	0.944212	3.63279	2.94558	0.0293294	NA	3.63279	6.42974	4.26e-05
PXDN	1295.32	-0.115828	0.455157	1	1295.32	-0.0911791	0.556213	0.976023	1295.32	-0.0121715	0.937731	0.984346	1295.32	-0.593118	0.000153343	0.0023621	1295.32	-0.653237	4.3e-05
CEP57L1	187.513	0.236044	0.151285	1	187.513	-0.0963543	0.548682	0.975054	187.513	0.23023	0.173566	0.551797	187.513	-0.227	0.154921	0.361001	187.513	-0.68849	4.33e-05
ZNF385A	256.889	-0.101193	0.527936	1	256.889	0.165725	0.298508	0.924963	256.889	0.251888	0.130929	0.489424	256.889	0.197104	0.232975	0.465246	256.889	0.686318	4.33e-05
AMIGO3	36.9258	-0.787065	0.0196467	1	36.9258	0.055993	0.864563	0.993238	36.9258	0.921416	0.00906553	0.156562	36.9258	1.78462	3.43e-07	1.69e-05	36.9258	1.49911	4.36e-05
DGCR6L	597.168	0.0180719	0.870569	1	597.168	-0.0998195	0.353236	0.94012	597.168	0.396417	0.000459114	0.0341436	597.168	0.150198	0.167431	0.379778	597.168	0.463129	4.38e-05
GAL	537.448	0.15516	0.277317	1	537.448	0.107634	0.446628	0.956047	537.448	-0.115261	0.430871	0.776737	537.448	0.368589	0.009875	0.0562968	537.448	0.612839	4.39e-05
DDX58	12.4928	0.185864	0.713652	1	12.4928	-0.468672	0.291453	0.915766	12.4928	-0.768927	0.196229	0.581249	12.4928	0.873747	0.0584893	0.192088	12.4928	2.04839	4.42e-05
ZNF764	324.198	0.122918	0.461932	1	324.198	0.050264	0.7603	0.99209	324.198	0.547202	0.00129879	0.0600808	324.198	0.511197	0.00221072	0.0186703	324.198	0.710384	4.43e-05
PTPN11	671.796	-0.123684	0.354897	1	671.796	-0.229813	0.0824734	0.747938	671.796	-0.424959	0.00221075	0.079911	671.796	-0.340117	0.0108823	0.059923	671.796	-0.563906	4.48e-05
TTC17	752.994	-0.212471	0.0430938	1	752.994	0.249837	0.0141482	0.494605	752.994	0.0712123	0.510118	0.82779	752.994	0.0370662	0.71531	0.861147	752.994	-0.422937	4.49e-05
KLHL9	398.681	0.0596502	0.626998	1	398.681	-0.0231451	0.843779	0.992693	398.681	-0.0620948	0.626286	0.878969	398.681	0.345764	0.00292618	0.0228157	398.681	0.486148	4.49e-05
LOC101928096	56.5419	-0.120712	0.683317	1	56.5419	0.22081	0.453073	0.959708	56.5419	1.09845	0.000543958	0.0380816	56.5419	1.04447	0.000518755	0.00634563	56.5419	1.32053	4.5e-05
MARS2	892.882	0.0434089	0.784651	1	892.882	0.479431	0.00230268	0.280263	892.882	0.143343	0.371872	0.733859	892.882	0.548774	0.000490709	0.00609234	892.882	0.658322	4.51e-05
ATP2B1	343.278	-0.193218	0.261228	1	343.278	0.107955	0.520699	0.968306	343.278	-0.0372699	0.832667	0.954477	343.278	-0.430163	0.0129702	0.0678205	343.278	-0.733974	4.52e-05
MYO10	326.798	-0.0740081	0.626909	1	326.798	-0.0980665	0.513498	0.968306	326.798	-0.0119079	0.939108	0.984692	326.798	-0.46896	0.00260804	0.0211049	326.798	-0.671064	4.58e-05
G2E3	506.559	0.0569109	0.546099	1	506.559	-0.108637	0.235857	0.88487	506.559	-0.155409	0.122729	0.47929	506.559	0.143394	0.118468	0.30664	506.559	0.38956	4.61e-05
SCAMP2	787.526	0.062974	0.509922	1	787.526	-0.128891	0.174289	0.852228	787.526	-0.122193	0.222667	0.611146	787.526	-0.205024	0.0336329	0.131899	787.526	-0.406923	4.63e-05
ZNF281	927.418	-0.133545	0.222679	1	927.418	0.0272215	0.800593	0.99209	927.418	0.0451337	0.688118	0.902915	927.418	0.617025	1.38e-08	1.16e-06	927.418	0.449307	4.64e-05
L1CAM	16.1645	0.650162	0.24209	1	16.1645	-0.223957	0.671236	0.987729	16.1645	-0.027594	0.961543	0.989663	16.1645	-0.768364	0.173085	0.387763	16.1645	-2.59168	4.65e-05
PSMC4	1241.3	0.0129243	0.885638	1	1241.3	0.0113083	0.899006	0.993238	1241.3	0.155484	0.0895349	0.418161	1241.3	0.679368	4.21e-14	1.85e-11	1241.3	0.380813	4.65e-05
LIN7B	169.493	-0.0920781	0.677931	1	169.493	-0.0695759	0.753344	0.99209	169.493	-0.265963	0.255762	0.644128	169.493	-0.592392	0.00780419	0.047727	169.493	-0.918618	4.69e-05
GNB1	2875.57	-0.0462847	0.393491	1	2875.57	-0.173634	0.0011853	0.200569	2875.57	-0.111711	0.0451814	0.313647	2875.57	-0.188874	0.00050421	0.006213	2875.57	-0.228806	4.77e-05
NRGN	519.079	-0.1092	0.573225	1	519.079	-0.392884	0.0421426	0.646492	519.079	0.0429272	0.827522	0.953802	519.079	0.0467849	0.810066	0.911844	519.079	0.816616	4.88e-05
PCSK6-AS1	51.848	-0.209295	0.569468	1	51.848	-0.795796	0.0256336	0.562372	51.848	0.555833	0.162949	0.533322	51.848	0.950089	0.00609786	0.0392283	51.848	1.46674	4.88e-05
LINC00115	33.8777	0.166807	0.726522	1	33.8777	0.0615107	0.895015	0.993238	33.8777	-0.624409	0.244073	0.632789	33.8777	0.5595	0.213199	0.441851	33.8777	1.8462	4.88e-05
TROAP	1575.77	0.0692882	0.543539	1	1575.77	-0.136447	0.233189	0.88413	1575.77	-0.0056014	0.96159	0.989663	1575.77	-0.142407	0.218851	0.448256	1575.77	0.481251	4.89e-05
TMEM201	132.148	-0.0535389	0.769022	1	132.148	0.0891403	0.626852	0.986217	132.148	0.485764	0.0125434	0.18002	132.148	0.540476	0.00512627	0.0344104	132.148	0.885352	4.9e-05
KCTD2	258.869	0.15993	0.390991	1	258.869	-0.00106907	0.995404	0.999254	258.869	0.0887011	0.64325	0.885331	258.869	0.66186	0.000393954	0.00507771	258.869	0.767892	4.98e-05
ID3	192.119	0.255643	0.127613	1	192.119	0.145184	0.368741	0.94012	192.119	0.127806	0.457253	0.793201	192.119	0.467542	0.00309058	0.023867	192.119	0.679107	5.01e-05
WDR83OS	890.285	-0.0776553	0.582673	1	890.285	0.102992	0.46236	0.961004	890.285	0.133331	0.351898	0.720885	890.285	0.493308	0.000453075	0.00570803	890.285	0.576416	5.02e-05
LYAR	1968.17	-0.0495593	0.627178	1	1968.17	0.267249	0.00853281	0.454114	1968.17	0.272776	0.00816458	0.149472	1968.17	0.346456	0.000705626	0.00792111	1968.17	0.427556	5.03e-05
PAK2	394.348	0.0707672	0.627255	1	394.348	-0.0608062	0.674454	0.987729	394.348	-0.304013	0.0447796	0.311692	394.348	-0.682944	5.34e-06	0.000170246	394.348	-0.644951	5.04e-05
PRC1	2879.23	-0.0785934	0.285669	1	2879.23	-0.0477214	0.51005	0.968306	2879.23	0.123913	0.0979507	0.435868	2879.23	-0.0254386	0.72543	0.867293	2879.23	-0.295333	5.08e-05
SRSF1	1504.12	-0.0229278	0.809785	1	1504.12	0.0132523	0.88782	0.993238	1504.12	-0.342788	0.000386657	0.0313011	1504.12	-0.00119725	0.99001	0.995782	1504.12	0.406195	5.09e-05
RUVBL1	1143.9	-0.0187798	0.831633	1	1143.9	0.209226	0.0156554	0.50776	1143.9	0.00820462	0.927889	0.980875	1143.9	0.259695	0.00288747	0.0226254	1143.9	0.378181	5.13e-05
DDX28	77.3311	-0.185994	0.48233	1	77.3311	0.508248	0.0466246	0.677233	77.3311	0.0999196	0.717441	0.912318	77.3311	0.496437	0.0525384	0.177985	77.3311	1.13761	5.22e-05
STK16	35.1857	-0.0701417	0.850073	1	35.1857	0.154262	0.674553	0.987729	35.1857	-0.0669626	0.864393	0.965024	35.1857	0.478417	0.156321	0.362945	35.1857	1.41495	5.23e-05
ENTPD7	70.4138	-0.192826	0.402898	1	70.4138	0.230254	0.302606	0.924963	70.4138	-0.315395	0.224344	0.613199	70.4138	-0.120268	0.618559	0.801105	70.4138	-1.06735	5.24e-05
PHAX	651.701	0.457538	0.000100751	0.220091	651.701	0.295283	0.00980681	0.465957	651.701	0.395522	0.000858299	0.0476448	651.701	0.508951	9.74e-06	0.000275869	651.701	0.483078	5.25e-05
CDRT4	49.5927	0.0166346	0.956796	1	49.5927	0.143997	0.618345	0.985653	49.5927	-0.0360522	0.908949	0.976144	49.5927	-0.132786	0.638482	0.813575	49.5927	-1.19197	5.34e-05
LONP1	179.61	-0.114308	0.453998	1	179.61	-0.137432	0.367268	0.94012	179.61	-0.113053	0.491286	0.815208	179.61	-0.209672	0.180194	0.398219	179.61	-0.728102	5.39e-05
RGS5	63.8931	0.204364	0.434154	1	63.8931	0.149306	0.54773	0.974431	63.8931	0.0975613	0.710371	0.910397	63.8931	0.585184	0.0137474	0.0703894	63.8931	1.00457	5.39e-05
TBL1X	1356.04	-0.109715	0.369093	1	1356.04	-0.153372	0.208031	0.869583	1356.04	-0.114166	0.355169	0.722564	1356.04	-0.464379	0.000168788	0.00255664	1356.04	-0.512908	5.41e-05
IFT22	1413.08	-0.249363	0.0531553	1	1413.08	-0.0799601	0.532499	0.969181	1413.08	0.195864	0.132933	0.491677	1413.08	0.133582	0.297925	0.538065	1413.08	0.523256	5.53e-05
CFL1P1	21.6209	0.512562	0.443698	1	21.6209	-0.0125474	0.985441	0.999254	21.6209	0.685565	0.297702	0.679369	21.6209	0.899673	0.163888	0.374845	21.6209	2.83631	5.61e-05
TMEM241	442.037	-0.114403	0.356449	1	442.037	0.205888	0.0909368	0.759573	442.037	0.216016	0.0866769	0.413246	442.037	-0.449246	0.000289398	0.00398087	442.037	-0.523314	5.65e-05
TIMM13	246.546	-0.0980153	0.567864	1	246.546	-0.189231	0.265979	0.899985	246.546	0.253453	0.152281	0.519667	246.546	0.200223	0.24733	0.481993	246.546	0.750394	5.66e-05
SAFB2	270.946	-0.143739	0.280757	1	270.946	0.20568	0.120427	0.800674	270.946	0.135429	0.335794	0.708366	270.946	0.148249	0.288581	0.528149	270.946	-0.631238	5.79e-05
ZSCAN16	249.866	0.021337	0.935339	1	249.866	0.531365	0.0423445	0.647876	249.866	0.380582	0.15906	0.527806	249.866	1.02354	8.94e-05	0.00156506	249.866	1.05606	5.8e-05
CNFN	255.635	0.222245	0.156275	1	255.635	-0.12232	0.424837	0.948274	255.635	0.14173	0.363864	0.728053	255.635	-0.05119	0.736063	0.872757	255.635	0.623584	5.85e-05
WLS	781.682	-0.145093	0.164704	1	781.682	0.0262406	0.798899	0.99209	781.682	-0.352134	0.00113202	0.0555045	781.682	-0.160593	0.122673	0.313336	781.682	-0.43171	5.86e-05
ILKAP	1061.32	-0.0475101	0.709438	1	1061.32	0.157317	0.214545	0.875185	1061.32	0.207855	0.107611	0.450982	1061.32	0.403296	0.00166362	0.0150021	1061.32	0.52836	5.91e-05
NEFL	456.983	0.120362	0.26684	1	456.983	-0.136704	0.188257	0.86068	456.983	-0.26229	0.0172732	0.20573	456.983	-0.523911	3.58e-07	1.76e-05	456.983	-0.456742	5.93e-05
MORF4L2	4390.71	0.0074606	0.926387	1	4390.71	0.0953282	0.233355	0.88413	4390.71	0.0660973	0.416014	0.765024	4390.71	0.155809	0.0503642	0.172994	4390.71	-0.3201	5.95e-05
CBLN3	16.8807	1.29093	0.0208451	1	16.8807	0.835487	0.131804	0.81278	16.8807	0.0457367	0.931455	0.981838	16.8807	1.25454	0.0184128	0.0866424	16.8807	2.44565	5.96e-05
LOC105373456	5.62811	-2.24334	0.08778	1	5.62811	-0.943394	0.357232	NA	5.62811	-0.275214	0.782151	0.935804	5.62811	2.73373	0.0105228	0.058565	5.62811	6.01714	5.98e-05
AASDHPPT	734.153	0.115974	0.271622	1	734.153	0.0657931	0.524022	0.968306	734.153	-0.0803917	0.460388	0.795621	734.153	0.236824	0.0213785	0.0965623	734.153	0.432181	5.99e-05
IMPAD1	6836.76	0.105589	0.251349	1	6836.76	-0.121495	0.186174	0.858613	6836.76	-0.0425219	0.645369	0.885456	6836.76	-0.331091	0.00033156	0.00444484	6836.76	-0.373644	6.05e-05
ERAP1	51.2969	-0.543767	0.0709194	1	51.2969	0.097437	0.726495	0.99209	51.2969	0.347155	0.247487	0.63669	51.2969	0.254339	0.356835	0.594901	51.2969	1.15843	6.05e-05
EI24	14030	-0.0469721	0.705149	1	14030	0.0894827	0.470713	0.961004	14030	0.0654139	0.598724	0.867635	14030	0.471333	0.000146548	0.00228408	14030	0.498244	6.13e-05
ISCU	309.607	0.11264	0.490547	1	309.607	-0.119524	0.450714	0.95877	309.607	0.125092	0.456447	0.792434	309.607	0.368848	0.0198307	0.0915643	309.607	0.645372	6.16e-05
PCGF3	1218.28	-0.222222	0.0455798	1	1218.28	-0.2462	0.0246599	0.55889	1218.28	0.0788476	0.484909	0.811	1218.28	-0.33146	0.00268348	0.0215123	1218.28	-0.448567	6.19e-05
HOXB13	90.1578	0.00691342	0.971562	1	90.1578	-0.159369	0.410052	0.944969	90.1578	0.101974	0.631534	0.880649	90.1578	0.0231077	0.906295	0.958349	90.1578	0.872632	6.19e-05
CCT4	3032.39	0.0232625	0.720547	1	3032.39	0.00154095	0.980801	0.999254	3032.39	-0.0277568	0.674407	0.897132	3032.39	-0.124478	0.0528926	0.178886	3032.39	-0.263716	6.25e-05
LOC101930071	46.7851	-0.754488	0.0339806	1	46.7851	-0.0414112	0.906256	0.993238	46.7851	0.195885	0.591614	0.86627	46.7851	0.123741	0.726385	0.867488	46.7851	1.45024	6.26e-05
WAC	1174.04	0.0854518	0.388859	1	1174.04	0.138113	0.156458	0.837896	1174.04	0.0314267	0.755852	0.926802	1174.04	0.328966	0.000718778	0.0080377	1174.04	0.396258	6.27e-05
LOC112268064	7.68328	1.1512	0.218227	1	7.68328	0.422677	0.576999	NA	7.68328	0.0641651	0.936126	0.983787	7.68328	1.43802	0.0670747	0.210848	7.68328	3.66136	6.28e-05
ASXL1	576.886	0.040873	0.695193	1	576.886	-0.0479175	0.641561	0.986263	576.886	0.103727	0.341079	0.712776	576.886	0.376992	0.00027866	0.00385873	576.886	0.433452	6.3e-05
ZNF783	33.9711	-0.151804	0.629307	1	33.9711	-0.0541751	0.859058	0.993238	33.9711	-0.305575	0.377943	0.737227	33.9711	0.393484	0.228571	0.460248	33.9711	1.74389	6.38e-05
ACTR2	1145.16	-0.0345827	0.692996	1	1145.16	-0.0980315	0.252091	0.895073	1145.16	-0.133735	0.135891	0.496278	1145.16	0.0636136	0.461103	0.687324	1145.16	-0.359877	6.39e-05
BHLHE40	344.419	-0.196992	0.58664	1	344.419	-0.689057	0.0564267	0.69925	344.419	-0.585784	0.112221	0.460325	344.419	-0.79288	0.0263698	0.111755	344.419	-1.42924	6.43e-05
FBXW7	145.047	0.0748033	0.711626	1	145.047	0.109888	0.577755	0.981647	145.047	-0.0459195	0.82561	0.952821	145.047	0.508063	0.00914318	0.0533818	145.047	0.827097	6.43e-05
AIG1	562.376	0.0279958	0.828674	1	562.376	0.182315	0.151488	0.833686	562.376	-0.0452548	0.732259	0.918677	562.376	-0.0264263	0.834874	0.925281	562.376	0.524467	6.48e-05
ZNF461	113.458	0.518593	0.13673	1	113.458	0.0855627	0.803272	0.99209	113.458	0.611566	0.0838204	0.40675	113.458	1.29321	0.000113212	0.00186182	113.458	1.31884	6.52e-05
NDUFA12	6958.1	-0.0501142	0.699013	1	6958.1	-0.0167235	0.897198	0.993238	6958.1	-0.0334337	0.796908	0.941524	6958.1	0.359284	0.00549035	0.036213	6958.1	0.517445	6.54e-05
URM1	128.247	-0.17368	0.428831	1	128.247	-0.0179345	0.934108	0.99546	128.247	0.110445	0.628892	0.879832	128.247	0.210639	0.340596	0.580624	128.247	0.943359	6.58e-05
TIA1	317.187	0.152318	0.246074	1	317.187	-0.0435269	0.730155	0.99209	317.187	-0.244473	0.0747367	0.389997	317.187	-0.460214	0.000405054	0.00517941	317.187	-0.560687	6.59e-05
CA8	195.088	-0.210067	0.239548	1	195.088	0.0874302	0.615147	0.98449	195.088	0.0591318	0.746978	0.923812	195.088	-0.532001	0.0025447	0.0207095	195.088	-0.769607	6.6e-05
TMEM245	486.139	-0.134605	0.207282	1	486.139	0.0677488	0.514544	0.968306	486.139	0.0374467	0.733946	0.919903	486.139	-0.223483	0.0341263	0.133115	486.139	-0.431754	6.66e-05
PLOD2	186.796	-0.321884	0.0545379	1	186.796	-0.318263	0.0469719	0.677981	186.796	-0.535841	0.00230838	0.0824808	186.796	-0.387022	0.0159653	0.07819	186.796	-0.697986	6.72e-05
SURF1	126.814	0.00434677	0.985463	1	126.814	-0.164424	0.481197	0.963979	126.814	0.026181	0.915799	0.977981	126.814	0.216666	0.355612	0.593508	126.814	0.953878	6.73e-05
RNF187	1321.47	0.0638511	0.364909	1	1321.47	-0.10141	0.143211	0.823458	1321.47	0.113655	0.117668	0.469312	1321.47	0.124514	0.0788095	0.234389	1321.47	0.295967	6.85e-05
KYAT3	256.15	-0.102774	0.540187	1	256.15	-0.0154375	0.923889	0.994807	256.15	-0.049093	0.77465	0.934514	256.15	-0.306802	0.0613132	0.198272	256.15	-0.688054	6.87e-05
KAZALD1	83.9933	-0.0851211	0.748525	1	83.9933	-0.54138	0.036204	0.618351	83.9933	-0.0809969	0.76757	0.932167	83.9933	-0.17501	0.484589	0.705537	83.9933	-1.03381	6.9e-05
STBD1	283.323	-0.0447656	0.769723	1	283.323	-0.0980185	0.510318	0.968306	283.323	0.229353	0.154487	0.52177	283.323	-0.391829	0.0086532	0.0512419	283.323	-0.590939	6.92e-05
CHMP1B	120.177	0.0949488	0.631928	1	120.177	0.161681	0.377463	0.941267	120.177	-0.164786	0.413578	0.763178	120.177	0.284186	0.114213	0.29909	120.177	0.74946	6.92e-05
UBE2C	834.577	0.0562304	0.700182	1	834.577	0.124344	0.390448	0.941267	834.577	-0.12271	0.409256	0.759364	834.577	0.310886	0.0318929	0.126995	834.577	0.579836	6.95e-05
KDM7A-DT	144.889	0.0245678	0.910454	1	144.889	-0.346591	0.114565	0.788658	144.889	0.262756	0.240137	0.629417	144.889	-0.0934367	0.661842	0.827121	144.889	0.913549	6.96e-05
MBNL3	176.666	-0.254298	0.148766	1	176.666	0.159767	0.354908	0.94012	176.666	-0.107113	0.559012	0.852328	176.666	-0.490311	0.00692547	0.0434179	176.666	-0.834314	6.97e-05
SENP6	440.179	-0.031822	0.780876	1	440.179	-0.00737554	0.947186	0.996049	440.179	0.0581071	0.6243	0.877907	440.179	0.256672	0.0232611	0.102391	440.179	0.481296	6.98e-05
FAM47E-STBD1	283.471	-0.0427913	0.779742	1	283.471	-0.102959	0.489574	0.964518	283.471	0.22222	0.167838	0.541226	283.471	-0.394295	0.0082846	0.0496871	283.471	-0.590952	7e-05
AK1	552.218	0.0300927	0.775928	1	552.218	-0.0032589	0.975031	0.998459	552.218	0.208237	0.0541586	0.339307	552.218	0.19484	0.0672707	0.211327	552.218	0.445921	7.13e-05
WAS	54.6076	0.0994561	0.804026	1	54.6076	0.0609142	0.873872	0.993238	54.6076	0.278758	0.478019	0.80584	54.6076	0.404144	0.271728	0.509976	54.6076	1.57793	7.16e-05
RBM39	1484.64	0.214062	0.0168926	1	1484.64	0.225409	0.0109304	0.480876	1484.64	-0.00657482	0.942822	0.985157	1484.64	0.317951	0.000314085	0.004252	1484.64	0.355173	7.18e-05
ZNF485	92.0772	0.161586	0.485411	1	92.0772	0.348072	0.12464	0.80699	92.0772	0.219177	0.376341	0.736324	92.0772	0.683301	0.00253393	0.0206554	92.0772	0.999756	7.18e-05
TAF3	448.707	-0.0199609	0.906327	1	448.707	0.228201	0.175198	0.852228	448.707	-0.098896	0.569384	0.856875	448.707	0.679637	5.67e-05	0.00109315	448.707	0.6868	7.25e-05
CDC37	1319.22	-0.0517284	0.534518	1	1319.22	-0.0103705	0.899841	0.993238	1319.22	-0.0729574	0.392761	0.746584	1319.22	0.22997	0.00563945	0.0369003	1319.22	0.346906	7.28e-05
METTL7B	38.0245	-0.0580413	0.885158	1	38.0245	0.36456	0.351533	0.94012	38.0245	-0.0456006	0.914621	0.977981	38.0245	-0.352521	0.38102	0.619094	38.0245	2.02412	7.32e-05
RRAGD	198.945	-0.175126	0.189956	1	198.945	0.0897039	0.484933	0.964518	198.945	-0.251942	0.0794981	0.400012	198.945	-0.32213	0.0144543	0.0730813	198.945	-0.550635	7.34e-05
CAPN10-DT	73.8178	0.106302	0.645727	1	73.8178	-0.141404	0.522632	0.968306	73.8178	-0.280796	0.277342	0.661641	73.8178	0.481393	0.0317971	0.126787	73.8178	0.894048	7.42e-05
RNF214	425.667	0.333828	0.0172715	1	425.667	0.0232632	0.866905	0.993238	425.667	-0.063171	0.660818	0.891105	425.667	0.704291	2.96e-07	1.51e-05	425.667	0.572157	7.49e-05
KRTDAP	49.8336	0.141032	0.704009	1	49.8336	0.5056	0.17739	0.853717	49.8336	0.463027	0.231189	0.620728	49.8336	1.09852	0.00046468	0.00583905	49.8336	1.168	7.56e-05
SCML1	663.558	0.00995506	0.943698	1	663.558	-0.00274386	0.984309	0.999254	663.558	-0.373992	0.0101199	0.163053	663.558	-0.0197809	0.887775	0.949151	663.558	-0.565822	7.58e-05
CIZ1	765.848	-0.0798453	0.459329	1	765.848	-0.131022	0.221698	0.878205	765.848	0.0780786	0.484086	0.810596	765.848	0.172027	0.119018	0.307754	765.848	0.44943	7.59e-05
VSIG10L	57.2934	-0.502401	0.22837	1	57.2934	-0.269188	0.519912	0.968306	57.2934	0.112605	0.791542	0.939542	57.2934	-0.209511	0.620499	0.802258	57.2934	-1.8379	7.61e-05
ARFGEF3	159.828	0.0617615	0.730049	1	159.828	-0.410274	0.019538	0.532994	159.828	0.2664	0.15372	0.520766	159.828	-0.289122	0.10159	0.275986	159.828	-0.75132	7.7e-05
MFSD3	596.636	-0.136583	0.26497	1	596.636	-0.105528	0.384605	0.941267	596.636	0.201003	0.105354	0.448641	596.636	-0.142998	0.253458	0.48852	596.636	0.543211	7.71e-05
PIGL	716.656	-0.17575	0.246349	1	716.656	0.23767	0.112919	0.783437	716.656	0.0242311	0.874172	0.969012	716.656	-0.0501234	0.734559	0.871758	716.656	-0.587871	7.73e-05
PTTG1IP	1249.7	-0.0447781	0.642533	1	1249.7	-0.0920672	0.334719	0.935646	1249.7	0.000131521	0.998942	1	1249.7	0.37963	6.72e-05	0.00123133	1249.7	0.381357	7.77e-05
NEDD4	85.8846	-0.0982198	0.715264	1	85.8846	-0.156723	0.539885	0.973942	85.8846	-0.33846	0.212916	0.599524	85.8846	-0.398959	0.124995	0.317204	85.8846	-1.15963	7.79e-05
PGM1	474.463	-0.197315	0.0955422	1	474.463	-0.111087	0.338573	0.937354	474.463	0.0558646	0.646598	0.885963	474.463	-0.35144	0.00250185	0.0204512	474.463	-0.481666	7.8e-05
TSN	1470.55	-0.082266	0.526612	1	1470.55	0.000945765	0.994152	0.999254	1470.55	-0.256133	0.0507002	0.329419	1470.55	0.509428	8.62e-05	0.00151712	1470.55	0.524035	7.87e-05
NCAPD2	599.445	-0.145754	0.171414	1	599.445	-0.273545	0.00949982	0.462138	599.445	-0.307538	0.00551438	0.124578	599.445	-0.15736	0.142897	0.344023	599.445	0.446411	7.94e-05
NCBP2AS2	2527.52	0.122467	0.355018	1	2527.52	-0.126802	0.336329	0.936361	2527.52	-0.126991	0.34133	0.712885	2527.52	0.25962	0.0489593	0.169652	2527.52	0.523521	7.99e-05
MEIS1-AS3	57.2111	-0.602923	0.133422	1	57.2111	-0.649157	0.094744	0.760283	57.2111	0.535792	0.183722	0.566361	57.2111	0.111242	0.769511	0.892734	57.2111	1.51116	8.01e-05
SEPTIN10	208.429	0.247213	0.175938	1	208.429	-0.00619339	0.972201	0.998143	208.429	-0.454464	0.0174565	0.207174	208.429	-0.201599	0.259473	0.495274	208.429	-0.742598	8.05e-05
ND4	299851	-0.0749949	0.343174	1	299851	-0.142705	0.0712594	0.728701	299851	-0.0152652	0.847019	0.958788	299851	0.0476156	0.547262	0.752369	299851	-0.312003	8.05e-05
HM13	822.731	-0.0394327	0.643307	1	822.731	-0.000738592	0.993003	0.999254	822.731	0.323754	0.000210067	0.0233026	822.731	0.132533	0.118104	0.306026	822.731	0.352221	8.16e-05
CDC23	674.671	0.0336677	0.798005	1	674.671	0.255761	0.0494304	0.682386	674.671	0.136542	0.305769	0.684611	674.671	-0.095985	0.462207	0.688193	674.671	-0.519113	8.27e-05
MRPL50	140.058	0.303739	0.0735169	1	140.058	0.205288	0.185765	0.85813	140.058	-0.102987	0.556868	0.851157	140.058	0.123875	0.414881	0.650108	140.058	0.648014	8.33e-05
NME1-NME2	10401.8	-0.00678333	0.939037	1	10401.8	0.0124524	0.888013	0.993238	10401.8	-0.0126938	0.886468	0.970569	10401.8	0.250063	0.00467077	0.0321553	10401.8	0.348392	8.38e-05
C5orf30	143.567	0.0914194	0.694073	1	143.567	0.204896	0.37042	0.94012	143.567	-0.287728	0.232209	0.621638	143.567	-0.163245	0.469678	0.694685	143.567	-0.943035	8.41e-05
MDFIC	127.089	0.165541	0.545091	1	127.089	-0.309055	0.245655	0.891284	127.089	-0.105401	0.708457	0.910205	127.089	0.0815029	0.763094	0.889113	127.089	1.0927	8.55e-05
ASPM	1058.13	-0.173844	0.0845114	1	1058.13	-0.242388	0.0146304	0.503273	1058.13	-0.405919	9.9e-05	0.014963	1058.13	0.122543	0.219926	0.449633	1058.13	0.403644	8.57e-05
POLR2K	2678.77	0.176193	0.110172	1	2678.77	0.13281	0.225414	0.878838	2678.77	-0.103324	0.353922	0.721534	2678.77	0.251676	0.0215233	0.0969285	2678.77	0.431936	8.79e-05
STRIP1	231.446	-0.0183728	0.886923	1	231.446	0.00522468	0.967097	0.998141	231.446	0.0604683	0.663369	0.891791	231.446	0.20717	0.123608	0.314728	231.446	0.594025	8.79e-05
MOCOS	108.001	0.27753	0.190986	1	108.001	-0.301732	0.141923	0.823458	108.001	-0.192906	0.379981	0.738621	108.001	-0.41536	0.0540417	0.1818	108.001	-0.948387	8.8e-05
CCAR1	4800.75	0.143703	0.0235424	1	4800.75	0.188731	0.00265832	0.30159	4800.75	0.107849	0.0923403	0.425006	4800.75	0.324587	2.72e-07	1.4e-05	4800.75	0.252177	8.83e-05
IFT140	322.04	0.017909	0.900566	1	322.04	0.115739	0.415114	0.945119	322.04	-0.0211177	0.885022	0.970569	322.04	-0.507634	0.000337324	0.00450709	322.04	-0.598962	8.94e-05
SF3A1	742.236	-0.0675133	0.463947	1	742.236	-0.221483	0.0146033	0.503273	742.236	-0.0769902	0.422387	0.770711	742.236	0.115209	0.212296	0.440763	742.236	0.387836	8.99e-05
TPD52	567.635	-0.0052974	0.962256	1	567.635	-0.230357	0.0349587	0.60941	567.635	-0.0888383	0.441539	0.782398	567.635	-0.192817	0.0774267	0.231372	567.635	-0.441228	9.02e-05
PEPD	1522.48	-0.0533324	0.610962	1	1522.48	-0.29343	0.00478658	0.372269	1522.48	-0.0823263	0.440787	0.782373	1522.48	0.223898	0.0336865	0.131995	1522.48	0.438726	9.04e-05
DSN1	531.661	0.164865	0.0868678	1	531.661	0.176504	0.0579156	0.69925	531.661	-0.0407013	0.685201	0.90147	531.661	-0.1113	0.239127	0.472865	531.661	-0.378017	9.05e-05
EIF4E3	156.208	-0.111734	0.571835	1	156.208	-0.147447	0.442621	0.955636	156.208	-0.235529	0.260716	0.646919	156.208	-0.38899	0.0435589	0.156346	156.208	-0.785741	9.06e-05
UQCR10	1665.8	0.0260145	0.812774	1	1665.8	0.0984333	0.365771	0.94012	1665.8	0.161142	0.146366	0.511343	1665.8	0.431345	6.99e-05	0.00127148	1665.8	0.42757	9.13e-05
ELK4	132.576	-0.0193671	0.915662	1	132.576	0.161706	0.37091	0.94012	132.576	0.174563	0.379568	0.738415	132.576	0.564799	0.00141804	0.0133843	132.576	0.678225	9.13e-05
HELLS	2009.54	-0.0251262	0.705625	1	2009.54	-0.0609607	0.354186	0.94012	2009.54	-0.073984	0.279511	0.662916	2009.54	0.0525548	0.433903	0.665562	2009.54	-0.282723	9.17e-05
BANF1	3514.55	0.125793	0.367553	1	3514.55	0.0346242	0.80372	0.99209	3514.55	0.161465	0.248374	0.637599	3514.55	0.315565	0.0235846	0.103314	3514.55	0.546255	9.18e-05
TMEM138	414.971	0.213504	0.21512	1	414.971	0.229728	0.177335	0.853717	414.971	0.197813	0.264026	0.648929	414.971	0.390645	0.0229683	0.101533	414.971	0.699105	9.19e-05
BCL2L2-PABPN1	2044.3	0.0729218	0.481937	1	2044.3	0.0270639	0.79367	0.99209	2044.3	0.257386	0.0140955	0.186774	2044.3	0.102527	0.32299	0.564555	2044.3	0.411237	9.23e-05
RIMS3	31.7182	-0.343484	0.254601	1	31.7182	0.182448	0.55605	0.976023	31.7182	-0.639875	0.0891355	0.417677	31.7182	-1.07587	0.00138846	0.0132344	31.7182	-1.50184	9.27e-05
NOVA1	292.304	0.092434	0.563637	1	292.304	0.0439842	0.780248	0.99209	292.304	0.216886	0.179077	0.559136	292.304	-0.0388948	0.807498	0.910703	292.304	0.646745	9.34e-05
FGFR1OP2	202.67	0.324033	0.0418599	1	202.67	0.176363	0.237562	0.88631	202.67	-0.0237643	0.883005	0.970569	202.67	0.439976	0.00274585	0.0218794	202.67	0.575476	9.36e-05
ZNF585A	209.33	-0.369851	0.133954	1	209.33	0.223758	0.359047	0.94012	209.33	-0.0448819	0.859876	0.963025	209.33	1.09964	3.12e-06	0.000109305	209.33	0.91714	9.36e-05
POLR1A	464.569	0.231155	0.0474329	1	464.569	-0.180021	0.120853	0.802323	464.569	0.165736	0.17306	0.550978	464.569	-0.0247271	0.836288	0.925652	464.569	0.52921	9.47e-05
TLE2	104.979	-0.152235	0.537357	1	104.979	-0.215018	0.371917	0.94012	104.979	-0.33246	0.199042	0.584287	104.979	0.174602	0.467952	0.693478	104.979	-0.96479	9.48e-05
EXOSC5	655.154	-0.121271	0.266802	1	655.154	0.221594	0.0404037	0.641207	655.154	0.265596	0.0177416	0.2078	655.154	0.451483	3.31e-05	0.000719137	655.154	0.454828	9.49e-05
C5orf51	195.348	0.291258	0.0515301	1	195.348	0.345179	0.0159484	0.508168	195.348	0.207151	0.174779	0.553278	195.348	0.325667	0.0224299	0.0998683	195.348	0.626402	9.59e-05
MALAT1	2480.55	-0.0404376	0.848786	1	2480.55	-0.0235269	0.911552	0.993238	2480.55	-0.240887	0.257138	0.644285	2480.55	0.066985	0.751782	0.883312	2480.55	-0.826887	9.6e-05
ARPC5L	460.961	0.00992187	0.94333	1	460.961	-0.0124935	0.927825	0.995377	460.961	0.0255784	0.859626	0.963025	460.961	0.565415	4.73e-05	0.000945918	460.961	0.552366	9.63e-05
FER1L4	152.127	0.392665	0.214965	1	152.127	-0.473378	0.13675	0.817178	152.127	-0.0669039	0.83442	0.955176	152.127	-0.777993	0.0137389	0.0703894	152.127	-1.27164	9.64e-05
MSX2	175.928	0.411898	0.104587	1	175.928	0.262741	0.287758	0.913805	175.928	0.63666	0.0118054	0.175589	175.928	0.612275	0.0137624	0.0704416	175.928	0.99741	9.71e-05
PABPN1	2091.23	0.0638402	0.536029	1	2091.23	0.0310448	0.763014	0.99209	2091.23	0.251496	0.015895	0.19592	2091.23	0.0886535	0.390402	0.628644	2091.23	0.407775	9.75e-05
ANK3	149.536	-0.269214	0.199401	1	149.536	0.121525	0.554819	0.976023	149.536	0.164011	0.44662	0.784945	149.536	0.0885677	0.677217	0.836897	149.536	-0.887044	9.76e-05
COMT	581.327	-0.14199	0.238337	1	581.327	-0.0858865	0.47065	0.961004	581.327	0.293804	0.0174193	0.207153	581.327	-0.434278	0.000320924	0.00432845	581.327	-0.499463	9.76e-05
LINC02641	7.80263	0.544243	0.648828	1	7.80263	-0.641675	0.547506	NA	7.80263	2.50081	0.0360794	0.283223	7.80263	1.062	0.290494	0.529871	7.80263	4.13643	9.78e-05
TATDN2	381.66	-0.018986	0.915763	1	381.66	0.0117605	0.947596	0.996049	381.66	-0.20188	0.275618	0.660446	381.66	0.449746	0.0130973	0.0681897	381.66	0.735987	9.79e-05
DZIP1	936.297	0.12385	0.36947	1	936.297	-0.24556	0.0721765	0.729596	936.297	-0.25675	0.0657853	0.369	936.297	-0.026147	0.849374	0.93117	936.297	-0.558665	9.8e-05
TBC1D9	162.613	-0.13544	0.544686	1	162.613	0.471613	0.029356	0.582815	162.613	0.175582	0.435191	0.779642	162.613	-0.385797	0.0751771	0.227554	162.613	-0.884727	9.81e-05
H4C3	5512.53	0.126874	0.382156	1	5512.53	0.239797	0.0979984	0.760283	5512.53	0.0413318	0.776313	0.934662	5512.53	0.655882	6.13e-06	0.000190619	5512.53	0.568913	9.81e-05
TSPAN2	57.8095	-0.101814	0.773638	1	57.8095	0.147362	0.667402	0.986951	57.8095	-0.418199	0.256014	0.644285	57.8095	-1.63892	6.39e-06	0.000197796	57.8095	-1.4019	9.88e-05
EIF2AK3-DT	37.3336	0.625739	0.186617	1	37.3336	-0.478858	0.257237	0.898552	37.3336	-0.321992	0.478693	0.806664	37.3336	0.137927	0.729131	0.869141	37.3336	1.54567	9.96e-05
FBXO42	198.814	0.0377683	0.795122	1	198.814	0.0893798	0.531296	0.968963	198.814	0.0953851	0.536426	0.840527	198.814	0.286641	0.0461258	0.163003	198.814	0.603465	0.000100666
TTC39B	37.1106	-0.293663	0.367391	1	37.1106	-0.126752	0.693183	0.988849	37.1106	-0.85172	0.0240234	0.241304	37.1106	-0.878601	0.00780665	0.047727	37.1106	-1.36078	0.000102418
ELOB	1194.2	-0.114333	0.296173	1	1194.2	0.0434441	0.687758	0.988703	1194.2	0.0638976	0.563408	0.85331	1194.2	0.162888	0.132334	0.328652	1194.2	0.42353	0.000102722
EYA3	457.252	-0.0242599	0.840242	1	457.252	0.0046081	0.96879	0.998141	457.252	0.106155	0.393635	0.747771	457.252	-0.0889304	0.453781	0.680952	457.252	-0.480925	0.000102912
SLC25A40	59.4423	-0.112203	0.712689	1	59.4423	0.153727	0.60945	0.983642	59.4423	-0.700778	0.0422191	0.303661	59.4423	-0.464896	0.134928	0.332879	59.4423	-1.29223	0.000102913
ADNP	336.86	0.260832	0.116683	1	336.86	-0.137648	0.39909	0.943195	336.86	-0.168745	0.320207	0.695952	336.86	0.62031	0.000170557	0.00257538	336.86	0.661409	0.000104034
SEMA6A	314.62	0.0921705	0.501774	1	314.62	0.192701	0.154688	0.836545	314.62	-0.17287	0.22053	0.608286	314.62	-0.300731	0.0328517	0.129745	314.62	-0.595554	0.00010516
LINC01976	49.0328	0.0558619	0.844116	1	49.0328	0.222257	0.433483	0.951072	49.0328	0.38376	0.189311	0.572294	49.0328	0.438988	0.127737	0.321574	49.0328	1.22727	0.000105653
USP9X	1847.1	0.000893148	0.991343	1	1847.1	-0.0935925	0.250794	0.894467	1847.1	-0.0771422	0.356266	0.723302	1847.1	-0.404352	1.03e-06	4.26e-05	1847.1	-0.332566	0.000106
LOC107986650	257.634	-0.0331146	0.908341	1	257.634	-0.165622	0.565743	0.978838	257.634	-0.0187916	0.948815	0.986517	257.634	0.417021	0.151679	0.356462	257.634	1.1548	0.000106261
SAP18	1742.31	0.0448088	0.738863	1	1742.31	0.000502132	0.996998	0.999327	1742.31	-0.104579	0.441093	0.782373	1742.31	0.520114	9.62e-05	0.0016576	1742.31	0.51831	0.000106674
BTG1	174.215	-0.014822	0.932963	1	174.215	0.244349	0.152346	0.833686	174.215	0.0860912	0.631279	0.88055	174.215	-0.0104937	0.950416	0.977239	174.215	-0.665156	0.000106744
SLC46A3	554.202	-0.0357407	0.814372	1	554.202	0.00245944	0.986967	0.999254	554.202	-0.212023	0.168605	0.542686	554.202	-0.321194	0.0342125	0.133379	554.202	-0.589607	0.000106759
BUD23	278.872	0.0541511	0.694785	1	278.872	-0.0287552	0.831317	0.992423	278.872	0.117557	0.401278	0.753194	278.872	0.255345	0.0671412	0.211011	278.872	0.594994	0.00010735
NME2	10131.4	-0.00936392	0.915764	1	10131.4	0.0118949	0.892787	0.993238	10131.4	-0.0175199	0.843509	0.958171	10131.4	0.245852	0.00532272	0.0354374	10131.4	0.342368	0.000107454
POLR3E	380.598	0.0492812	0.656482	1	380.598	0.248848	0.0216342	0.544542	380.598	0.187296	0.104143	0.446851	380.598	-0.213228	0.0559914	0.186117	380.598	-0.473251	0.000107513
SNTB2	783.943	-0.416701	0.00339834	1	783.943	0.105747	0.454355	0.960165	783.943	-8.6e-05	0.999526	1	783.943	-0.425845	0.00311633	0.0240198	783.943	-0.568586	0.000107737
IPO4	517.781	-0.0436861	0.649473	1	517.781	0.0187017	0.843482	0.992693	517.781	0.238181	0.0174825	0.207174	517.781	0.196139	0.0492938	0.170365	517.781	0.471661	0.000108461
CCT7	1728.82	0.0463808	0.648506	1	1728.82	0.0376974	0.709399	0.992056	1728.82	0.232066	0.0242177	0.241447	1728.82	0.246334	0.0151944	0.0757167	1728.82	0.399799	0.000110081
WDR73	219.36	0.0687001	0.640053	1	219.36	0.177922	0.218081	0.877631	219.36	0.293132	0.0603174	0.354851	219.36	0.409972	0.00532561	0.0354374	219.36	0.655609	0.000110954
THAP10	146.474	0.148197	0.465644	1	146.474	0.112766	0.569283	0.979131	146.474	-0.241081	0.257769	0.644682	146.474	0.765872	0.000102073	0.00173416	146.474	0.777335	0.000111101
SMARCC1	831.876	-0.0147178	0.897267	1	831.876	-0.0296938	0.792665	0.99209	831.876	-0.0132241	0.909079	0.976153	831.876	-0.0210455	0.85446	0.933601	831.876	-0.469752	0.000111398
UACA	293.792	-0.020266	0.904747	1	293.792	-0.111733	0.499585	0.965648	293.792	-0.610131	0.000441068	0.0336246	293.792	-0.194005	0.24432	0.479011	293.792	-0.683696	0.000112175
ZHX2	72.9171	0.502757	0.0130172	1	72.9171	-0.0561802	0.773437	0.99209	72.9171	-0.375893	0.0875381	0.415072	72.9171	-0.556666	0.00951448	0.0547876	72.9171	-1.03231	0.000112203
MAPKAP1	846.336	0.0373395	0.670407	1	846.336	-0.194433	0.0239577	0.553279	846.336	0.0184639	0.839574	0.956825	846.336	0.143611	0.100589	0.274345	846.336	0.35317	0.000112548
POLE3	1840.05	0.068689	0.528189	1	1840.05	0.171853	0.112471	0.782353	1840.05	0.320303	0.0035962	0.105067	1840.05	0.557448	2.63e-07	1.37e-05	1840.05	0.424432	0.000112766
SLC35E4	56.6669	-0.795603	0.0306145	1	56.6669	1.1672	0.00192312	0.26502	56.6669	1.35419	0.000201148	0.0229633	56.6669	1.02332	0.00443703	0.0311063	56.6669	1.49363	0.000113524
CDCA8	573.02	0.0433482	0.7495	1	573.02	-0.0951273	0.477709	0.962923	573.02	-0.00566506	0.967853	0.992108	573.02	0.300874	0.0259303	0.110682	573.02	0.528977	0.00011519
SLC16A9	78.6466	-0.40202	0.127995	1	78.6466	-0.0268567	0.916608	0.993238	78.6466	-1.31634	7.48e-06	0.00258333	78.6466	-1.40908	4.86e-07	2.28e-05	78.6466	-1.19329	0.00011545
RRM2	886.849	0.125386	0.321291	1	886.849	-0.0829397	0.508739	0.968306	886.849	0.00893094	0.944494	0.985498	886.849	-0.385863	0.00267451	0.0214641	886.849	-0.532414	0.000116673
CAMKK1	50.3794	-0.434861	0.252359	1	50.3794	0.113239	0.765393	0.99209	50.3794	-0.482816	0.252759	0.640803	50.3794	0.909306	0.0154039	0.0763415	50.3794	1.49346	0.00011674
F8A1	103.698	-0.0770224	0.754475	1	103.698	0.215735	0.379403	0.941267	103.698	0.329322	0.198657	0.584022	103.698	-0.272923	0.270519	0.508549	103.698	1.03817	0.000116983
PARM1	32.7514	-0.445125	0.14641	1	32.7514	-0.276049	0.335839	0.936082	32.7514	0.309144	0.31617	0.692221	32.7514	-0.378866	0.229442	0.461234	32.7514	-1.25632	0.000118515
NFATC3	227.191	-0.00939114	0.940672	1	227.191	-0.192514	0.113864	0.786756	227.191	-0.104918	0.440931	0.782373	227.191	0.245453	0.0503781	0.173001	227.191	0.521181	0.000119428
PRCC	209.259	-0.064521	0.631617	1	209.259	0.245806	0.0630992	0.710428	209.259	-0.0373826	0.791412	0.939542	209.259	0.478154	0.000495611	0.00613224	209.259	0.595904	0.000119708
RPUSD2	108.949	-0.133146	0.481009	1	108.949	0.14625	0.423644	0.948274	108.949	0.134026	0.516547	0.831127	108.949	0.703125	0.000215919	0.0031333	108.949	0.802584	0.000120894
ATAD3A	461.943	-0.0351516	0.791626	1	461.943	-0.21033	0.112212	0.782346	461.943	0.224775	0.102457	0.442995	461.943	0.0991566	0.461878	0.687975	461.943	0.571246	0.000121927
HDAC11	94.2439	-0.340871	0.160806	1	94.2439	-0.0999561	0.669365	0.986951	94.2439	-0.0967527	0.701296	0.907069	94.2439	-0.11596	0.620136	0.801932	94.2439	0.968448	0.000121974
HARBI1	63.0002	0.371315	0.206087	1	63.0002	0.758408	0.00723335	0.430496	63.0002	0.530741	0.0705849	0.380513	63.0002	0.702763	0.00966655	0.0553692	63.0002	1.04877	0.000122102
R3HCC1	142.94	-0.0914021	0.653885	1	142.94	-0.183815	0.363891	0.94012	142.94	0.375158	0.0745682	0.389909	142.94	0.530703	0.0117787	0.0634869	142.94	0.877173	0.000122263
LOC105377359	6.60149	0.656417	0.512871	1	6.60149	0.00441393	0.996385	NA	6.60149	2.23936	0.0215877	0.232366	6.60149	1.65222	0.0744026	0.225961	6.60149	5.56414	0.000122638
SGSM3	149.259	-0.261568	0.113758	1	149.259	-0.216648	0.188011	0.86068	149.259	-0.132309	0.451429	0.788713	149.259	-0.617678	0.000318252	0.0043004	149.259	-0.729471	0.00012438
DARS-AS1	7.23363	-0.327406	0.693936	1	7.23363	-0.554936	0.500237	NA	7.23363	0.154159	0.866136	0.965596	7.23363	-1.32578	0.127544	0.321223	7.23363	-5.42141	0.000124686
HMGXB4	555.878	0.167688	0.17979	1	555.878	0.183644	0.133268	0.81278	555.878	-0.220889	0.0829068	0.405564	555.878	-0.0636661	0.604066	0.792009	555.878	-0.498242	0.000126452
CUEDC1	89.0549	0.11529	0.596409	1	89.0549	-0.238608	0.262233	0.899985	89.0549	-0.23797	0.302232	0.682691	89.0549	-1.11206	1.95e-06	7.36e-05	89.0549	-0.986827	0.000128726
TBC1D1	316.74	-0.037432	0.83886	1	316.74	0.0242761	0.894628	0.993238	316.74	-0.260138	0.168524	0.542537	316.74	-0.550599	0.00262563	0.0212124	316.74	-0.705364	0.000129469
GABPB1-IT1	71.5484	0.489558	0.137087	1	71.5484	-0.480072	0.124371	0.80699	71.5484	-0.0561855	0.867324	0.96609	71.5484	0.542655	0.0777036	0.231979	71.5484	1.25298	0.00012953
TMEM117	38.3692	-0.382445	0.167122	1	38.3692	-0.36923	0.140966	0.823458	38.3692	0.227395	0.427448	0.774158	38.3692	-0.656004	0.0244435	0.10599	38.3692	-1.20017	0.000129555
LRRC3	82.0589	-0.0728345	0.807013	1	82.0589	-0.814957	0.00558902	0.383992	82.0589	-0.23938	0.441411	0.782398	82.0589	0.424491	0.161478	0.370791	82.0589	-1.37202	0.000130115
BID	282.661	-0.12096	0.336869	1	282.661	-0.130256	0.276111	0.905622	282.661	-0.0880217	0.503055	0.823156	282.661	-0.060882	0.616189	0.800032	282.661	-0.496318	0.000130361
TRO	156.872	0.127338	0.496783	1	156.872	-0.107637	0.559276	0.97752	156.872	-0.199511	0.311186	0.688325	156.872	-0.230586	0.216425	0.445422	156.872	-0.736536	0.000130582
HMGN2	103.81	-0.049191	0.798744	1	103.81	0.0335494	0.85601	0.993238	103.81	-0.15839	0.43254	0.778121	103.81	0.360682	0.0630045	0.202032	103.81	0.80984	0.000130781
VTA1	2033.75	-0.151274	0.139866	1	2033.75	0.0214283	0.832793	0.992423	2033.75	0.151225	0.14427	0.508478	2033.75	0.0854204	0.398287	0.635689	2033.75	0.389814	0.00013128
ZNF593	592.244	-0.00735439	0.951402	1	592.244	0.225037	0.0580499	0.69925	592.244	0.655264	1.11e-07	0.000101851	592.244	0.347446	0.00390978	0.0283826	592.244	0.472805	0.000131974
DMC1	166.467	0.185972	0.237884	1	166.467	0.120145	0.422995	0.948274	166.467	0.11777	0.454532	0.79108	166.467	0.255093	0.0633384	0.20236	166.467	0.531539	0.000133048
SRSF12	323.352	0.0440471	0.784892	1	323.352	-0.0602749	0.700433	0.990457	323.352	0.00265321	0.987096	0.997141	323.352	-0.27915	0.073861	0.224833	323.352	-0.613427	0.000133052
FAM126A	236.812	-0.0373069	0.761251	1	236.812	0.0979027	0.406657	0.944655	236.812	-0.146355	0.261118	0.6474	236.812	0.424058	0.000362708	0.00476373	236.812	0.506004	0.000133617
ERLIN1	145.171	-0.0271273	0.886293	1	145.171	-0.0169603	0.927004	0.99498	145.171	-0.15114	0.446225	0.784841	145.171	0.00428604	0.981386	0.991991	145.171	-0.745725	0.000133691
BBIP1	204.988	-0.203393	0.193096	1	204.988	0.119356	0.424781	0.948274	204.988	-0.14837	0.361283	0.72668	204.988	-0.365056	0.0156555	0.0770626	204.988	-0.579894	0.000133958
MTCH2	550.255	-0.0801147	0.424713	1	550.255	0.130587	0.182263	0.85813	550.255	-0.107723	0.302168	0.682691	550.255	0.0882509	0.373015	0.611559	550.255	0.412767	0.000134063
CAMK2D	110.466	0.106854	0.628103	1	110.466	-0.0208469	0.919844	0.993914	110.466	-0.502457	0.0319937	0.269382	110.466	-0.314025	0.136875	0.335967	110.466	-0.845272	0.000135498
DOLK	57.9174	0.0211271	0.944221	1	57.9174	-0.0541826	0.856248	0.993238	57.9174	-0.100938	0.761196	0.929838	57.9174	0.0538464	0.864008	0.93801	57.9174	1.36032	0.000136448
IFT27	352.661	0.0833071	0.468306	1	352.661	-0.0688249	0.538325	0.973206	352.661	0.0740246	0.53506	0.839905	352.661	-0.446239	0.000102744	0.00173989	352.661	-0.452578	0.000137021
EMC9	115.57	0.0768222	0.740654	1	115.57	0.00142549	0.994906	0.999254	115.57	0.471142	0.0472235	0.321866	115.57	0.950136	1.64e-05	0.000413675	115.57	0.841128	0.000137563
AGPAT4	202.698	0.0810813	0.527519	1	202.698	-0.0161402	0.895676	0.993238	202.698	-0.161385	0.23636	0.625427	202.698	-0.272468	0.0222948	0.0994855	202.698	-0.487471	0.000139331
PVT1	142.412	-0.0888645	0.710735	1	142.412	0.25183	0.278479	0.907527	142.412	0.25627	0.289127	0.671835	142.412	0.941873	3.25e-05	0.000712811	142.412	0.897656	0.000140292
MICAL2	151.529	0.194037	0.291698	1	151.529	-0.119095	0.508114	0.968306	151.529	-0.216319	0.260138	0.646414	151.529	-0.516024	0.00710913	0.0443588	151.529	-0.897173	0.000140779
USP22	8860.29	0.0776945	0.321341	1	8860.29	-0.166672	0.0330993	0.601161	8860.29	-0.00224332	0.977263	0.994003	8860.29	-0.200158	0.0108281	0.0597288	8860.29	-0.301831	0.000142554
MMAA	44.4643	0.207429	0.592852	1	44.4643	-0.222125	0.545805	0.974368	44.4643	0.217525	0.582181	0.862286	44.4643	-0.352254	0.338669	0.579276	44.4643	-1.62506	0.00014278
GARS1	1341.34	-0.046071	0.591693	1	1341.34	0.0197867	0.814671	0.99209	1341.34	-0.169994	0.0537265	0.338222	1341.34	0.0222095	0.794523	0.905231	1341.34	-0.333046	0.000143039
OBI1	534.559	0.127543	0.246285	1	534.559	0.227172	0.0316368	0.593527	534.559	0.20061	0.080721	0.402388	534.559	0.523945	4.68e-07	2.22e-05	534.559	0.40663	0.000143475
GTPBP10	153.29	0.425707	0.0161708	1	153.29	0.129842	0.435564	0.951635	153.29	0.410171	0.0232673	0.238709	153.29	0.499506	0.00321835	0.0246374	153.29	0.689503	0.00014424
ROCK1	636.082	-0.160489	0.308521	1	636.082	-0.0665509	0.668917	0.986951	636.082	-0.404175	0.0117094	0.175168	636.082	-0.282123	0.0736283	0.224266	636.082	-0.613579	0.000145087
COL14A1	347.434	-0.101132	0.658406	1	347.434	0.0743148	0.744027	0.99209	347.434	-0.445392	0.0550105	0.340365	347.434	-0.316228	0.166367	0.377955	347.434	-0.884542	0.000146703
ADCK2	101.485	-0.2396	0.243316	1	101.485	0.161301	0.41316	0.945119	101.485	0.308649	0.141284	0.504705	101.485	0.597993	0.00274267	0.0218661	101.485	0.82794	0.000146994
MPPED2	85.8067	-0.133967	0.569557	1	85.8067	-0.319697	0.162984	0.840287	85.8067	-0.44562	0.0671717	0.371548	85.8067	-0.686923	0.00598775	0.038678	85.8067	-1.00001	0.000147871
BABAM1	862.312	-0.0149487	0.880618	1	862.312	0.0833941	0.398169	0.94274	862.312	0.119857	0.240217	0.629521	862.312	0.104121	0.29628	0.536056	862.312	0.395157	0.000148663
BUB1	688.359	0.0303554	0.712928	1	688.359	-0.0541809	0.487248	0.964518	688.359	-0.0742727	0.383511	0.740762	688.359	-0.0478374	0.540749	0.748444	688.359	-0.307785	0.000149806
HBP1	291.808	0.0952454	0.606007	1	291.808	-0.00703699	0.968956	0.998141	291.808	0.059264	0.757189	0.927624	291.808	-0.257542	0.143562	0.345032	291.808	-0.663054	0.000149874
GOLGA7	506.463	-0.0580599	0.665298	1	506.463	0.0573144	0.661108	0.986879	506.463	-0.209135	0.133229	0.49208	506.463	0.430759	0.000838492	0.00903086	506.463	0.495515	0.000150137
DIRAS3	7.96446	-0.670807	0.536176	1	7.96446	-0.0450571	0.967351	NA	7.96446	-1.92118	0.112714	0.460846	7.96446	2.53898	0.0240979	0.104961	7.96446	6.00484	0.000150733
CCDC103	29.0289	0.0612846	0.883094	1	29.0289	0.954851	0.0182444	0.532205	29.0289	-0.772202	0.0816394	0.404009	29.0289	0.871061	0.0328731	0.129795	29.0289	1.74757	0.000151049
ZNF142	136.52	0.00366985	0.984993	1	136.52	-0.0194117	0.921258	0.99432	136.52	-0.0586749	0.782284	0.935804	136.52	0.63003	0.00193129	0.0168391	136.52	0.855655	0.000151231
CANX	4104.98	-0.0359433	0.682565	1	4104.98	-0.0698045	0.424477	0.948274	4104.98	0.0473141	0.592869	0.866964	4104.98	0.177379	0.0427037	0.154154	4104.98	-0.334248	0.000151451
HMGB3	1004.57	0.100579	0.369738	1	1004.57	-0.0451111	0.683585	0.987729	1004.57	-0.265267	0.0201825	0.223433	1004.57	0.488219	1.2e-05	0.000321957	1004.57	0.44042	0.000151846
APTR	47.2189	-0.37788	0.152671	1	47.2189	-0.158996	0.500165	0.96587	47.2189	-0.0610708	0.831499	0.954477	47.2189	0.273212	0.243351	0.478273	47.2189	0.959772	0.000152613
TIMP3	334.554	-0.0998427	0.587394	1	334.554	0.0039558	0.982535	0.999254	334.554	-0.266547	0.152782	0.519827	334.554	-0.752883	4.17e-05	0.000858602	334.554	-0.718505	0.000152887
HELZ	232.416	-0.0552106	0.707793	1	232.416	0.284738	0.0488819	0.682386	232.416	-0.183889	0.235169	0.624155	232.416	0.530275	0.000357094	0.00470704	232.416	0.608475	0.000153392
MON2	251.244	-0.433679	0.00705704	1	251.244	-0.197154	0.215009	0.875185	251.244	-0.0805348	0.631673	0.880649	251.244	-0.24014	0.137562	0.336856	251.244	-0.651274	0.000153423
GTF2A1	249.511	0.0367624	0.807286	1	249.511	0.0413248	0.77541	0.99209	249.511	-0.122103	0.43218	0.778014	249.511	-0.292636	0.0508386	0.174334	249.511	-0.622219	0.000153457
LOC105374306	7.32806	-0.665416	0.452613	1	7.32806	-0.00166791	0.998523	NA	7.32806	2.35773	0.0841289	0.40754	7.32806	0.800562	0.32177	0.563408	7.32806	3.48074	0.000153596
KIF17	88.0589	0.00352738	0.988246	1	88.0589	-0.272006	0.239194	0.887897	88.0589	0.121251	0.620076	0.876684	88.0589	-0.116906	0.614379	0.798968	88.0589	-0.980613	0.000153761
RNF126	300.071	0.258732	0.0415974	1	300.071	0.103981	0.409718	0.944969	300.071	0.305621	0.0225807	0.236432	300.071	0.478013	0.000223387	0.00322237	300.071	0.519263	0.000154215
LOC728673	186.557	-0.242658	0.267321	1	186.557	0.019965	0.926418	0.994905	186.557	-0.0158111	0.94433	0.985498	186.557	0.325692	0.136873	0.335967	186.557	0.878506	0.000155515
KCNG1	544.994	-0.0623956	0.743862	1	544.994	-0.23423	0.218422	0.877631	544.994	-0.0567948	0.768781	0.932363	544.994	-1.75593	4.74e-19	7.65e-16	544.994	-0.751684	0.000155913
RAB11FIP4	72.4792	0.135474	0.557278	1	72.4792	-0.255744	0.255789	0.898128	72.4792	0.0132843	0.956255	0.988565	72.4792	-0.506046	0.0343739	0.133757	72.4792	-1.11346	0.000157228
UROD	478.944	-0.0353351	0.814179	1	478.944	-0.0219321	0.882728	0.993238	478.944	0.611302	5.94e-05	0.0104887	478.944	0.206183	0.169031	0.381964	478.944	0.599477	0.000157304
NUDCD3	734.923	-0.211754	0.0919533	1	734.923	-0.069752	0.576291	0.981647	734.923	0.107169	0.404781	0.755757	734.923	-0.263963	0.0359925	0.137442	734.923	-0.485767	0.000157728
PMPCA	415.963	0.0749034	0.516232	1	415.963	0.00891082	0.938127	0.99546	415.963	0.188882	0.114318	0.462581	415.963	-0.358812	0.00255395	0.0207518	415.963	-0.505178	0.00015799
CENPU	340.54	0.0753951	0.511644	1	340.54	-0.032018	0.770939	0.99209	340.54	-0.052611	0.657401	0.890519	340.54	0.62641	1.3e-08	1.1e-06	340.54	0.435718	0.000158472
ARID4B	1047.28	-0.00126596	0.989269	1	1047.28	0.1358	0.142707	0.823458	1047.28	-0.0141341	0.884101	0.970569	1047.28	0.501323	7.61e-08	4.85e-06	1047.28	0.364068	0.000159431
RHBDD3	106.085	0.102184	0.646503	1	106.085	0.208423	0.344128	0.938294	106.085	0.406649	0.0819843	0.404009	106.085	0.570168	0.0119846	0.0641004	106.085	0.924486	0.000160252
MIPEPP3	6.21155	-0.941932	0.278242	1	6.21155	-1.98617	0.0300646	NA	6.21155	-0.905423	0.334944	0.707683	6.21155	-1.40241	0.137631	0.33691	6.21155	5.33182	0.000162656
NRCAM	160.162	-0.4834	0.0159167	1	160.162	0.0115094	0.952881	0.996049	160.162	-0.409433	0.0418313	0.302411	160.162	-0.955776	1.39e-06	5.48e-05	160.162	-0.771635	0.00016353
ARHGAP32	138.263	0.137803	0.397968	1	138.263	0.057017	0.719844	0.99209	138.263	-0.359303	0.0425566	0.305382	138.263	-0.756253	5.6e-06	0.000176821	138.263	-0.665836	0.000164373
UBA6	320.854	0.0408851	0.827622	1	320.854	-0.046151	0.802918	0.99209	320.854	0.00528676	0.977844	0.994003	320.854	0.0261241	0.88791	0.949151	320.854	-0.712678	0.000165353
PDIA4	289.871	0.0347869	0.868247	1	289.871	0.0149506	0.94257	0.995608	289.871	0.12137	0.571651	0.857311	289.871	-0.333113	0.115396	0.301267	289.871	-0.809227	0.00016558
LOC107985207	16.0945	-0.146789	0.833469	1	16.0945	1.02326	0.220165	0.877892	16.0945	0.366084	0.680042	0.899127	16.0945	2.51889	7.74e-05	0.00138741	16.0945	2.21084	0.000165582
LOC730202	40.0023	0.0949434	0.766497	1	40.0023	-0.0445354	0.890694	0.993238	40.0023	0.251283	0.450941	0.788589	40.0023	0.249999	0.417786	0.652695	40.0023	1.21164	0.000166256
NOL7	741.759	0.0420836	0.673995	1	741.759	0.0138125	0.887575	0.993238	741.759	-0.0139153	0.892462	0.971872	741.759	0.352003	0.000331562	0.00444484	741.759	0.385849	0.000166489
GPS2	14493.4	-0.0963721	0.20613	1	14493.4	-0.102824	0.17709	0.853717	14493.4	0.146685	0.0551713	0.340365	14493.4	0.275338	0.000310267	0.00420423	14493.4	0.289213	0.000166898
FXN	280.052	-0.022145	0.899863	1	280.052	-0.0561459	0.74738	0.99209	280.052	0.204964	0.257975	0.644766	280.052	0.256688	0.145908	0.348052	280.052	0.724157	0.000167111
SMNDC1	367.688	-0.0580916	0.683775	1	367.688	-0.209847	0.133081	0.81278	367.688	0.146954	0.317883	0.693259	367.688	0.536819	0.000119947	0.0019533	367.688	0.538752	0.000167191
SH3BP2	101.976	0.117689	0.5797	1	101.976	-0.149483	0.460632	0.961004	101.976	-0.0840385	0.699109	0.905985	101.976	-0.351622	0.0915549	0.25874	101.976	-0.823386	0.000167226
ATP6AP1	1152.83	-0.197646	0.110262	1	1152.83	-0.136369	0.268376	0.899985	1152.83	0.113387	0.368126	0.730098	1152.83	0.20556	0.0974618	0.269099	1152.83	0.48409	0.000167887
TK2	122.551	0.303758	0.246749	1	122.551	0.263891	0.309316	0.924963	122.551	0.0401533	0.879173	0.970112	122.551	0.726213	0.00401247	0.0289113	122.551	0.983584	0.00017015
SEC61A1	499.48	-0.0740522	0.540932	1	499.48	0.0321068	0.789149	0.99209	499.48	0.262377	0.0362696	0.283866	499.48	-0.0708987	0.565969	0.765385	499.48	-0.486967	0.000170383
EMC7	782.817	0.196892	0.0374394	1	782.817	0.0696942	0.445497	0.956047	782.817	0.090947	0.349978	0.719886	782.817	0.353949	9.09e-05	0.00158173	782.817	0.347937	0.000171456
ZSCAN26	73.2998	0.132347	0.605227	1	73.2998	-0.00102789	0.996669	0.999327	73.2998	0.0236253	0.928656	0.981039	73.2998	0.0577048	0.816926	0.915176	73.2998	0.98967	0.000172469
NRDC	1145.43	-0.0641632	0.473345	1	1145.43	-0.160374	0.0688942	0.722955	1145.43	0.0434951	0.635612	0.882306	1145.43	-0.185013	0.0372548	0.1409	1145.43	-0.346605	0.000172701
KCTD5	144.498	0.197845	0.318542	1	144.498	0.0717119	0.711796	0.99209	144.498	0.297123	0.152897	0.519904	144.498	0.620544	0.00135282	0.0130226	144.498	0.761132	0.000172741
YTHDF3-AS1	29.0366	0.236197	0.581022	1	29.0366	0.358935	0.382219	0.941267	29.0366	0.5253	0.228768	0.61839	29.0366	1.06299	0.00700632	0.0437925	29.0366	1.49941	0.000173213
DCST1-AS1	347.931	-0.406245	0.0287077	1	347.931	-0.333313	0.0716807	0.729182	347.931	-0.21259	0.263039	0.648234	347.931	-0.607615	0.00136718	0.0131261	347.931	0.740041	0.000174411
IL10RB	290.758	0.0812388	0.623189	1	290.758	-0.0402655	0.805844	0.99209	290.758	0.258345	0.127217	0.48444	290.758	-0.326617	0.0511199	0.174969	290.758	-0.647352	0.000175303
PAICS	5671.02	-0.0466897	0.528159	1	5671.02	-0.0726432	0.323709	0.932253	5671.02	-0.0601228	0.420858	0.769758	5671.02	-0.00373273	0.959603	0.981169	5671.02	-0.280954	0.000175948
RHOC	370.044	-0.193713	0.109349	1	370.044	0.232971	0.048722	0.682386	370.044	0.0553203	0.661618	0.891274	370.044	-0.0435276	0.707129	0.855952	370.044	-0.443007	0.000177173
SLC4A7	344.738	-0.0162906	0.941553	1	344.738	-0.091257	0.678294	0.987729	344.738	-0.22244	0.324805	0.699812	344.738	-0.322837	0.145593	0.347646	344.738	-0.863512	0.00017755
ANKRD10	838.007	-0.103686	0.413993	1	838.007	-0.188308	0.137074	0.817741	838.007	-0.418705	0.0012869	0.0598873	838.007	-0.562984	1.17e-05	0.000317059	838.007	-0.490812	0.000179915
BMP7	608.229	0.180991	0.196272	1	608.229	-0.239347	0.0850218	0.752716	608.229	0.070291	0.623018	0.877646	608.229	-0.570799	4.3e-05	0.000875952	608.229	-0.547104	0.000180095
MIR6820	6.63119	0.153819	0.832803	1	6.63119	-0.253437	0.72837	NA	6.63119	-0.0585673	0.935956	0.983674	6.63119	0.400622	0.565863	0.765338	6.63119	3.49448	0.000181885
EIF3I	1656.71	-0.0200095	0.784007	1	1656.71	-0.13414	0.0639727	0.712072	1656.71	0.14423	0.0533874	0.337675	1656.71	0.169721	0.0209403	0.0952345	1656.71	0.291569	0.000181975
NT5DC1	678.432	-0.0929762	0.537192	1	678.432	0.139757	0.347579	0.94012	678.432	-0.043473	0.77616	0.934662	678.432	-0.561916	0.000180224	0.0026989	678.432	-0.573854	0.000182744
RPARP-AS1	119.429	0.0824486	0.664802	1	119.429	-0.206707	0.271724	0.902184	119.429	0.01247	0.95052	0.986908	119.429	-0.000669005	0.997257	0.999045	119.429	0.849831	0.00018458
ARL2-SNX15	109.504	-0.14676	0.482768	1	109.504	-0.334889	0.0980251	0.760283	109.504	0.21773	0.314643	0.690252	109.504	0.393651	0.0614216	0.198515	109.504	0.819412	0.00018595
ZSCAN29	129.179	-0.038993	0.829221	1	129.179	-0.0337176	0.847884	0.992693	129.179	-0.157569	0.411054	0.760597	129.179	0.747158	3.72e-05	0.000784691	129.179	0.710971	0.00018605
ATF5	98.7628	0.113706	0.611629	1	98.7628	2.34e-05	0.999917	0.999917	98.7628	0.84725	0.000455576	0.0340433	98.7628	0.590758	0.0169389	0.0817186	98.7628	0.985038	0.000186129
BAZ1B	835.889	-0.0087139	0.927422	1	835.889	0.262325	0.00530519	0.378353	835.889	-0.056235	0.568913	0.856744	835.889	0.340424	0.000374412	0.00489092	835.889	0.374834	0.000186435
PCK1	16.707	0.197897	0.776669	1	16.707	0.0915778	0.8862	0.993238	16.707	0.721099	0.260344	0.646617	16.707	-1.35205	0.0117857	0.0634884	16.707	-1.89103	0.000186466
ZFAND2A	91.2564	0.189531	0.445284	1	91.2564	0.187884	0.436617	0.952053	91.2564	0.995181	7.1e-05	0.0118704	91.2564	0.682497	0.00415004	0.0297256	91.2564	0.896993	0.000188421
TSC2	2935.26	0.0521698	0.532561	1	2935.26	-0.154045	0.0654606	0.714481	2935.26	0.167601	0.0476887	0.322955	2935.26	-0.0898219	0.286716	0.525731	2935.26	0.325513	0.000188916
GALNT6	68.0051	-0.204878	0.487804	1	68.0051	-0.30452	0.291118	0.915766	68.0051	0.0609651	0.836305	0.955785	68.0051	-0.531653	0.0797464	0.235926	68.0051	-1.19336	0.000189139
UBL3	292.016	0.17757	0.180062	1	292.016	-0.199143	0.112422	0.782353	292.016	0.292012	0.030486	0.266205	292.016	0.320175	0.00918639	0.053505	292.016	0.481937	0.000189348
NECTIN3	399.013	0.00915233	0.948265	1	399.013	-0.304022	0.0289664	0.582815	399.013	0.0127932	0.931117	0.9818	399.013	0.264622	0.059357	0.194019	399.013	0.54043	0.000189629
AIP	377.973	0.0834854	0.445832	1	377.973	0.200975	0.0529936	0.687896	377.973	0.0325692	0.768605	0.932322	377.973	-0.0427787	0.675134	0.835457	377.973	-0.38897	0.000190715
FOXN3-AS1	112.97	-0.358953	0.441285	1	112.97	-0.255546	0.581832	0.981647	112.97	-0.681423	0.156518	0.524146	112.97	-0.22812	0.626822	0.806203	112.97	1.84403	0.000191802
MRPL11	295.158	0.0740258	0.538357	1	295.158	0.0884314	0.439396	0.95434	295.158	0.00908802	0.94233	0.985045	295.158	0.158444	0.170831	0.384309	295.158	0.459237	0.000192235
AK4	371.187	-0.0680163	0.664001	1	371.187	-0.211918	0.166446	0.845952	371.187	-0.272409	0.0902993	0.419827	371.187	-0.413127	0.00852065	0.0506428	371.187	-0.602691	0.000193076
LOC105374174	7.67913	-0.584058	0.442084	1	7.67913	-0.272943	0.714359	NA	7.67913	-0.329252	0.684502	0.901138	7.67913	0.789497	0.253245	0.488272	7.67913	2.90295	0.00019321
DNTTIP2	600.66	0.149183	0.27779	1	600.66	0.125041	0.355558	0.94012	600.66	0.00474581	0.972859	0.99367	600.66	0.544257	5.5e-05	0.00106474	600.66	0.512195	0.000193613
ILF3-DT	279.14	0.0801996	0.675615	1	279.14	0.0214421	0.90915	0.993238	279.14	0.0700731	0.715269	0.911937	279.14	0.319013	0.0860365	0.248019	279.14	0.703987	0.000193642
RGS10	267.877	-0.234595	0.124047	1	267.877	-0.11437	0.435784	0.951635	267.877	-0.254177	0.10735	0.450714	267.877	-0.407845	0.00475166	0.0324507	267.877	-0.542782	0.000194215
LOC100287497	147.723	-0.317236	0.0757545	1	147.723	-0.256851	0.142313	0.823458	147.723	-0.16024	0.38814	0.743604	147.723	-0.7228	0.000110872	0.00183432	147.723	-0.700987	0.000196052
RILPL1	426.528	0.118198	0.369739	1	426.528	0.173054	0.182066	0.85813	426.528	-0.0597917	0.65867	0.890541	426.528	-0.284823	0.0260338	0.110899	426.528	-0.487234	0.000196672
PRKRIP1	327.936	0.0915731	0.587923	1	327.936	0.0615659	0.714509	0.99209	327.936	0.428207	0.0127524	0.180849	327.936	0.516839	0.00215945	0.0184193	327.936	0.643485	0.000196963
SRRM5	3.56466	0.784116	0.517924	1	3.56466	1.64347	0.2058	NA	3.56466	2.09111	0.137122	0.49843	3.56466	1.78991	0.125665	NA	3.56466	5.8507	0.000197232
SIAE	186.448	-0.11481	0.527669	1	186.448	-0.0118492	0.945827	0.995801	186.448	0.113955	0.530584	0.8375	186.448	-0.0921948	0.601892	0.7908	186.448	0.677	0.000197586
DDX20	584.571	0.18282	0.204062	1	584.571	0.228626	0.105832	0.772756	584.571	0.141169	0.33899	0.710319	584.571	0.187386	0.183969	0.403553	584.571	0.539302	0.000197918
TINCR	40.0333	0.397715	0.402995	1	40.0333	-0.0302528	0.947036	0.996049	40.0333	0.632098	0.175666	0.554502	40.0333	1.41929	0.00162803	0.0147713	40.0333	1.70038	0.000198301
IFIT3	16.2688	-0.0975531	0.883322	1	16.2688	0.681724	0.314498	0.926448	16.2688	-0.074859	0.927095	0.980805	16.2688	1.06762	0.0789571	0.234494	16.2688	2.18012	0.000200027
SRP54	574.42	0.0181969	0.905024	1	574.42	0.126103	0.399465	0.943195	574.42	0.0228381	0.88255	0.970569	574.42	-0.239572	0.111489	0.294453	574.42	-0.564196	0.000200772
SOGA1	229.271	0.0909959	0.561117	1	229.271	-0.36436	0.0195913	0.532994	229.271	-0.31477	0.0558738	0.341505	229.271	-1.31936	3.28e-14	1.58e-11	229.271	-0.656972	0.000200793
NPTXR	355.888	-0.444564	0.0413765	1	355.888	-0.15434	0.480608	0.963979	355.888	-0.0455107	0.837367	0.956133	355.888	-1.38076	6.04e-10	8.52e-08	355.888	-0.839384	0.000202159
ACOT9	294.771	-0.0672218	0.600636	1	294.771	-0.0165931	0.894426	0.993238	294.771	-0.0796674	0.553892	0.850015	294.771	-0.219912	0.08642	0.248712	294.771	-0.506855	0.000202486
NUP62	1483.8	-0.0139453	0.89454	1	1483.8	0.102667	0.326982	0.933653	1483.8	0.259582	0.0152444	0.193417	1483.8	0.170901	0.106403	0.284983	1483.8	0.405663	0.000202553
BAG5	845.525	0.145628	0.299214	1	845.525	0.198401	0.153154	0.834461	845.525	0.00876827	0.950767	0.986908	845.525	0.634047	4.96e-06	0.000159887	845.525	0.527368	0.000202688
GAMT	353.293	-0.08521	0.596374	1	353.293	-0.484819	0.00266639	0.30159	353.293	0.236827	0.157236	0.525042	353.293	0.188213	0.266503	0.503895	353.293	0.668046	0.000203924
PSMB6	2233.21	-0.0418414	0.625896	1	2233.21	-0.0450946	0.597013	0.982562	2233.21	0.00658582	0.939727	0.984692	2233.21	0.356514	3.22e-05	0.000707496	2233.21	0.32444	0.00020524
SLC13A4	173.151	-0.161216	0.482399	1	173.151	-0.411367	0.0720023	0.729596	173.151	0.152022	0.517229	0.831198	173.151	-0.77065	0.00094687	0.0098526	173.151	-0.967591	0.000206169
SIM2	100.413	0.168618	0.476444	1	100.413	-0.191876	0.403431	0.943368	100.413	0.102779	0.668835	0.894793	100.413	-0.135934	0.559201	0.761294	100.413	-0.944875	0.00020629
KIF2A	272.302	0.154811	0.29538	1	272.302	0.236776	0.101637	0.765818	272.302	-0.281503	0.070059	0.379072	272.302	-0.380735	0.0106332	0.0589532	272.302	-0.583955	0.00020778
PRKACB	217.626	-0.0803401	0.674506	1	217.626	-0.214638	0.256437	0.898464	217.626	-0.0795308	0.689267	0.902915	217.626	-0.880275	8.11e-06	0.000236995	217.626	-0.765746	0.000208743
USP40	106.994	-0.0771899	0.765627	1	106.994	0.189545	0.452059	0.959348	106.994	-0.0175588	0.946837	0.985713	106.994	0.188172	0.455438	0.682593	106.994	0.97777	0.000209097
NDEL1	204.666	0.00500918	0.977817	1	204.666	0.107191	0.546839	0.974368	204.666	0.0944901	0.619205	0.876371	204.666	-0.181613	0.305101	0.546406	204.666	-0.668914	0.000210264
ZNHIT2	38.3714	0.280183	0.322674	1	38.3714	-0.198465	0.447694	0.956357	38.3714	0.690638	0.0200052	0.223161	38.3714	0.899304	0.00101855	0.0104046	38.3714	1.16547	0.000210444
C6orf226	50.0348	0.556079	0.112797	1	50.0348	0.150207	0.641952	0.986263	50.0348	0.0737609	0.83447	0.955176	50.0348	0.607137	0.0558129	0.185836	50.0348	1.16974	0.000210524
ACAD11	433.716	0.0686181	0.641006	1	433.716	0.106086	0.460219	0.961004	433.716	-0.242894	0.10288	0.444184	433.716	-0.4745	0.000847273	0.00909644	433.716	-0.545919	0.000211563
MRPL37	1597.97	0.0266386	0.74213	1	1597.97	-0.0360215	0.652573	0.986879	1597.97	0.173408	0.0360555	0.283221	1597.97	0.257131	0.0013138	0.012732	1597.97	0.304936	0.000212496
SDC3	216.066	0.0170072	0.94033	1	216.066	-0.122782	0.58902	0.982269	216.066	-0.0591333	0.800283	0.943119	216.066	-1.94294	7.15e-16	6.92e-13	216.066	-0.923982	0.000212609
PPP4R2	400.555	0.0138669	0.932686	1	400.555	0.195101	0.221749	0.878205	400.555	-0.145548	0.387293	0.742784	400.555	0.819664	2.49e-07	1.31e-05	400.555	0.601711	0.000212656
LOC101929289	85.1282	0.107934	0.692399	1	85.1282	-0.243764	0.361141	0.94012	85.1282	-0.600087	0.0445473	0.31119	85.1282	0.514014	0.0410622	0.150704	85.1282	0.930352	0.00021348
PRAF2	3309.93	0.210007	0.0701317	1	3309.93	-0.0818638	0.479532	0.963824	3309.93	-0.0858132	0.462241	0.796521	3309.93	-0.0770615	0.506684	0.723331	3309.93	-0.433425	0.000213486
KIAA0513	101.4	-0.0459301	0.851434	1	101.4	-0.236502	0.33092	0.934913	101.4	-0.566026	0.0352085	0.280771	101.4	-1.06805	3.42e-05	0.000739075	101.4	-1.01286	0.000216096
PURG	239.22	-0.116501	0.601639	1	239.22	-0.147554	0.495908	0.964518	239.22	0.526533	0.0182344	0.211348	239.22	-1.31482	3.1e-09	3.44e-07	239.22	-0.807618	0.000216538
C16orf95	97.4108	-0.0486977	0.816592	1	97.4108	0.088074	0.664814	0.986951	97.4108	-0.332198	0.13486	0.495068	97.4108	0.131344	0.503935	0.721265	97.4108	0.774024	0.00021706
CAST	570.627	-0.205296	0.0560154	1	570.627	-0.0881192	0.405656	0.943795	570.627	-0.536635	3.39e-06	0.00134959	570.627	0.166583	0.119587	0.308602	570.627	-0.422092	0.000217537
TOX2	109.661	-0.312109	0.253308	1	109.661	-0.0252756	0.925823	0.994902	109.661	-0.303608	0.27846	0.662439	109.661	-0.445549	0.0995545	0.272752	109.661	-1.07778	0.000217833
POLR2F	3485.54	-0.00233382	0.983753	1	3485.54	-0.0273046	0.811237	0.99209	3485.54	0.0477628	0.678565	0.898682	3485.54	0.294878	0.0101265	0.0572557	3485.54	0.429558	0.000218119
MRPL21	711.385	-0.0406709	0.758493	1	711.385	0.0192382	0.882707	0.993238	711.385	0.141151	0.298875	0.67971	711.385	0.361701	0.00541593	0.0358727	711.385	0.48839	0.000218951
RTCB	1355.43	0.0902163	0.41714	1	1355.43	-0.0222933	0.83918	0.992693	1355.43	0.226737	0.0440642	0.309537	1355.43	0.0625917	0.571371	0.769278	1355.43	-0.414351	0.000218969
RRAGA	743.2	0.141163	0.0825505	1	743.2	-0.113081	0.149924	0.831176	743.2	-0.0809123	0.352239	0.721061	743.2	0.114274	0.149485	0.353077	743.2	0.301772	0.000219856
C1orf220	17.3627	0.22856	0.641954	1	17.3627	0.41703	0.417571	0.945119	17.3627	0.57726	0.277423	0.661641	17.3627	-0.751602	0.160371	0.369359	17.3627	2.44322	0.000220148
NNT	178.957	-0.0966828	0.487874	1	178.957	0.0787232	0.552482	0.975959	178.957	0.086222	0.541555	0.843594	178.957	-0.253973	0.0525273	0.177985	178.957	-0.542084	0.000221073
FAM185A	39.3496	0.56056	0.142791	1	39.3496	-0.31027	0.39008	0.941267	39.3496	-0.776015	0.0502575	0.329183	39.3496	0.689525	0.0668773	0.210364	39.3496	1.5935	0.000221852
TM7SF2	175.747	0.0389637	0.821262	1	175.747	0.0716132	0.678681	0.987729	175.747	0.598521	0.000820087	0.0461679	175.747	0.0077386	0.965088	0.984501	175.747	0.746444	0.000222087
BEND6	20.4802	-0.413732	0.411887	1	20.4802	-0.24806	0.618997	0.985681	20.4802	0.108701	0.840094	0.956924	20.4802	-1.27245	0.0190104	0.0885363	20.4802	-2.26074	0.00022257
NOL12	881.948	-0.0925594	0.393116	1	881.948	0.0509426	0.635717	0.986217	881.948	0.268214	0.0152688	0.193417	881.948	0.251234	0.0201773	0.0928102	881.948	0.419384	0.000223101
PVR	300.87	0.0620411	0.597237	1	300.87	0.272652	0.0178299	0.531749	300.87	0.241207	0.0476854	0.322955	300.87	0.244657	0.0323774	0.12838	300.87	0.450557	0.00022384
SFT2D3	121.461	-0.140831	0.450255	1	121.461	-0.0822147	0.64398	0.986263	121.461	0.309692	0.112146	0.460325	121.461	0.140086	0.428282	0.661495	121.461	0.734085	0.000224024
HADHB	1025.86	0.181183	0.117832	1	1025.86	-0.0498513	0.662363	0.986879	1025.86	-0.0950053	0.422162	0.770711	1025.86	-0.204503	0.0750541	0.227275	1025.86	-0.433603	0.000224838
HOXA2	41.2792	0.0940051	0.750582	1	41.2792	-0.305476	0.319077	0.930842	41.2792	0.406603	0.207629	0.593388	41.2792	1.4974	2.1e-07	1.14e-05	41.2792	1.22051	0.00022583
PNO1	194.288	-0.186567	0.241291	1	194.288	0.142912	0.353609	0.94012	194.288	0.736415	9.79e-06	0.00310483	194.288	0.931758	4.77e-09	4.77e-07	194.288	0.659317	0.000226137
ADD3	580.563	0.0375974	0.779238	1	580.563	0.0536356	0.683823	0.987729	580.563	-0.380921	0.00519042	0.12298	580.563	-0.856283	2.51e-10	4.04e-08	580.563	-0.517151	0.000226241
PDE9A	454.343	0.172341	0.111119	1	454.343	0.0967795	0.357542	0.94012	454.343	-0.280344	0.0117799	0.175501	454.343	-0.549657	3.76e-07	1.83e-05	454.343	-0.419233	0.00022889
UFL1	114.846	0.0803621	0.742563	1	114.846	0.01964	0.933263	0.99546	114.846	-0.21285	0.390011	0.744527	114.846	-0.189734	0.415496	0.650531	114.846	-0.908519	0.000229277
PCGF5	239.402	-0.061371	0.693029	1	239.402	-0.0973395	0.523107	0.968306	239.402	0.0145691	0.928904	0.981039	239.402	0.206729	0.192784	0.414012	239.402	0.602356	0.000229304
PEF1	1355.16	0.0497124	0.60539	1	1355.16	0.266367	0.00465147	0.369309	1355.16	0.0582524	0.549915	0.847848	1355.16	0.399755	1.98e-05	0.000479788	1355.16	0.349548	0.000230871
TAGLN3	3.73797	1.59545	0.354712	1	3.73797	4.50836	0.00521685	NA	3.73797	2.31525	0.213585	0.600316	3.73797	2.01496	0.0747191	NA	3.73797	5.90501	0.000231401
TCP11L1	528.315	-0.0875339	0.512158	1	528.315	-0.247523	0.060664	0.70238	528.315	-0.166512	0.224121	0.613086	528.315	-0.454335	0.000647026	0.00743568	528.315	-0.508998	0.00023236
EIF5	944.178	-0.060786	0.641272	1	944.178	0.0639794	0.620959	0.986123	944.178	0.305912	0.0213005	0.230874	944.178	0.625934	2.03e-06	7.62e-05	944.178	0.498621	0.000233293
TMEM47	175.471	-0.0297073	0.888295	1	175.471	0.129948	0.530469	0.968963	175.471	0.213587	0.314286	0.689977	175.471	-0.824412	8.74e-05	0.00153468	175.471	-0.798604	0.000234051
GNL3	165.561	0.30632	0.191392	1	165.561	-0.0438087	0.849709	0.992693	165.561	-0.261997	0.277176	0.661641	165.561	0.0257597	0.911517	0.960925	165.561	-0.923155	0.000235299
GLI2	108.22	-0.269355	0.210288	1	108.22	-0.0481684	0.820207	0.99209	108.22	-0.17008	0.452855	0.789892	108.22	-0.518122	0.0206686	0.0943829	108.22	-0.924486	0.00023567
CAMKK2	568.803	-0.207175	0.0996829	1	568.803	-0.0918097	0.459768	0.961004	568.803	-0.392025	0.00256261	0.0877326	568.803	-0.547375	2.8e-05	0.000632043	568.803	-0.519214	0.000236792
RUNDC3B	223.946	-0.153631	0.391307	1	223.946	0.111555	0.525254	0.968306	223.946	-0.318038	0.0874172	0.414878	223.946	-0.437633	0.0149363	0.0748826	223.946	-0.713381	0.000236937
MAP4K3-DT	20.9672	0.813501	0.138526	1	20.9672	0.43923	0.399111	0.943195	20.9672	0.712171	0.165611	0.538174	20.9672	-1.07366	0.029078	0.119453	20.9672	-1.90102	0.000238783
ECPAS	338.131	-0.0781179	0.56315	1	338.131	-0.0845002	0.524237	0.968306	338.131	0.0507726	0.716811	0.912136	338.131	-0.186883	0.164276	0.375318	338.131	-0.521085	0.000239247
EMC4	2565.98	0.0471126	0.642883	1	2565.98	-0.023261	0.818214	0.99209	2565.98	0.0648798	0.528118	0.835815	2565.98	0.387161	0.0001251	0.00202135	2565.98	0.373439	0.000239379
RBMS1	248.236	-0.0100301	0.948867	1	248.236	0.16028	0.296809	0.921813	248.236	-0.0402925	0.80552	0.945348	248.236	-0.548286	0.000652763	0.00748385	248.236	-0.609127	0.000239582
RAB5B	245.039	-0.207168	0.234951	1	245.039	-0.118373	0.483277	0.964518	245.039	-0.188983	0.288854	0.671835	245.039	-0.530968	0.00253972	0.0206909	245.039	-0.646978	0.000240031
PACS2	142.417	-0.0745001	0.637236	1	142.417	-0.160644	0.302956	0.924963	142.417	-0.0888634	0.598617	0.867635	142.417	-0.686397	3.89e-05	0.00081239	142.417	-0.693017	0.000241947
EDEM3	195.107	-0.171345	0.278504	1	195.107	-0.0297991	0.846488	0.992693	195.107	-0.0473353	0.774023	0.934494	195.107	-0.699995	1.47e-05	0.000380005	195.107	-0.614429	0.000242383
LOC105374363	18.3193	0.154219	0.737859	1	18.3193	-0.775428	0.0963447	0.760283	18.3193	-0.888197	0.127227	0.48444	18.3193	0.336307	0.449327	0.677488	18.3193	1.75279	0.000242745
NDUFC2-KCTD14	535.433	-0.0326643	0.805712	1	535.433	0.125104	0.335433	0.935646	535.433	-0.141715	0.299911	0.680879	535.433	0.170285	0.191062	0.41208	535.433	0.492396	0.000243211
PIK3R2	714.439	-0.0317386	0.771629	1	714.439	-0.147149	0.17524	0.852228	714.439	-0.0971941	0.389272	0.744069	714.439	-0.238373	0.0342663	0.133513	714.439	-0.445556	0.000247311
LINC00294	433.617	-0.11825	0.428642	1	433.617	-0.290551	0.0497413	0.682802	433.617	-0.126261	0.410253	0.760292	433.617	-0.559818	0.00018229	0.00272422	433.617	-0.566436	0.000247679
EBLN2	68.6676	-0.24364	0.375477	1	68.6676	-0.463119	0.0858447	0.754254	68.6676	0.340765	0.236692	0.625427	68.6676	0.8558	0.00179714	0.0159553	68.6676	0.992908	0.000247792
SURF2	111.552	0.0145761	0.950946	1	111.552	0.330649	0.149318	0.830176	111.552	0.133384	0.582933	0.862486	111.552	0.47759	0.0424423	0.153477	111.552	0.918116	0.000248431
TAF12	268.745	-0.0422782	0.774938	1	268.745	-0.00638916	0.964446	0.997972	268.745	-0.118536	0.442322	0.782398	268.745	-0.180811	0.209376	0.436481	268.745	-0.536578	0.00024901
YIPF5	181.22	0.13769	0.424511	1	181.22	0.0692872	0.672733	0.987729	181.22	-0.180757	0.314275	0.689977	181.22	0.324065	0.0527785	0.178584	181.22	-0.635687	0.000250075
MYB	43.4121	-0.147356	0.695983	1	43.4121	-0.662251	0.0697588	0.725588	43.4121	-0.423624	0.277824	0.661999	43.4121	-1.08707	0.00380455	0.027759	43.4121	-1.48001	0.000250854
DHX32	174.782	-0.142526	0.428257	1	174.782	-0.115759	0.504618	0.968194	174.782	-0.0817945	0.656356	0.889738	174.782	-0.449818	0.0133074	0.0688891	174.782	-0.696724	0.000251834
SHTN1	311.026	0.122868	0.318794	1	311.026	0.0305793	0.799583	0.99209	311.026	-0.00387011	0.976076	0.99388	311.026	-0.343433	0.00649784	0.0413618	311.026	-0.496406	0.000253295
CCDC85C	533.431	-0.220047	0.0367351	1	533.431	-0.240115	0.0204802	0.537605	533.431	-0.14634	0.180823	0.561431	533.431	0.0906811	0.397766	0.63515	533.431	0.434529	0.000253957
VAX2	170.072	-0.033442	0.832797	1	170.072	-0.012795	0.935542	0.99546	170.072	0.204761	0.219909	0.607989	170.072	-0.260805	0.134944	0.332879	170.072	-0.734501	0.000257195
EXOSC10-AS1	28.5279	-0.301783	0.450312	1	28.5279	0.177963	0.64989	0.986879	28.5279	-0.291391	0.510585	0.828211	28.5279	1.38601	0.000904743	0.0095762	28.5279	1.69709	0.000258968
SCFD1	215.988	-0.0102936	0.948088	1	215.988	0.137443	0.366129	0.94012	215.988	0.687379	1.88e-05	0.00496072	215.988	-0.0391071	0.79834	0.906983	215.988	-0.574432	0.00025917
HIC2	1735.86	-0.0947289	0.39703	1	1735.86	0.138293	0.214579	0.875185	1735.86	0.215373	0.0561632	0.342734	1735.86	0.241526	0.0299528	0.121875	1735.86	0.411776	0.000259676
CAPZB	2187.31	0.0623984	0.443418	1	2187.31	-0.24671	0.00229221	0.280263	2187.31	0.208076	0.0117573	0.175378	2187.31	0.0868282	0.286429	0.525486	2187.31	0.304536	0.000260815
URB1-AS1	120.754	0.102099	0.672759	1	120.754	-0.183754	0.403095	0.943368	120.754	-0.15324	0.527953	0.835705	120.754	0.370555	0.0794084	0.235261	120.754	0.76365	0.000262106
ZBTB10	725.058	0.3371	0.00628709	1	725.058	0.327484	0.00655751	0.424667	725.058	0.205822	0.0978897	0.435868	725.058	0.0889077	0.460443	0.686837	725.058	-0.450118	0.000262272
ARCN1	809.135	0.0359496	0.737199	1	809.135	0.00866043	0.934499	0.99546	809.135	-0.175051	0.114327	0.462581	809.135	-0.109186	0.302417	0.543409	809.135	-0.391998	0.000263275
NHP2	1849.61	-0.13517	0.281122	1	1849.61	-0.145101	0.24647	0.891822	1849.61	0.150374	0.235734	0.624861	1849.61	0.238309	0.0578206	0.190368	1849.61	0.464526	0.000263607
FSCN1	1314.36	0.0336131	0.771302	1	1314.36	-0.134958	0.239352	0.887897	1314.36	-0.00834084	0.943007	0.985157	1314.36	-0.39207	0.000646337	0.00743365	1314.36	-0.428378	0.000264609
TMEM37	100.572	-0.188826	0.52211	1	100.572	-0.592436	0.0404163	0.641207	100.572	0.146524	0.629107	0.879889	100.572	-0.875368	0.00397223	0.028764	100.572	-1.16203	0.000265299
IQGAP2	197.939	0.0747059	0.720833	1	197.939	-0.194277	0.345175	0.938294	197.939	-0.158825	0.457715	0.793382	197.939	-0.333858	0.106971	0.285951	197.939	-0.818242	0.000265861
RHOG	386.281	-0.137032	0.252467	1	386.281	-0.0538829	0.64695	0.986879	386.281	-0.0725177	0.571054	0.857042	386.281	-0.10314	0.397178	0.635015	386.281	-0.457915	0.000269627
CLDND1	2886.02	-0.0339891	0.730873	1	2886.02	0.089823	0.359583	0.94012	2886.02	-0.218263	0.0289091	0.259281	2886.02	-0.256797	0.00868792	0.0514056	2886.02	-0.357599	0.0002746
LRRC14	125.507	0.035586	0.856437	1	125.507	-0.093251	0.634459	0.986217	125.507	-0.307581	0.146895	0.512207	125.507	0.295292	0.145701	0.347814	125.507	0.813002	0.000275158
SUOX	309.109	-0.0788578	0.60568	1	309.109	-0.0274558	0.853191	0.993238	309.109	-0.137036	0.3821	0.739864	309.109	-0.427164	0.00586634	0.0380761	309.109	-0.57044	0.000275443
PTPN9	302.49	-0.0764369	0.729121	1	302.49	-0.069961	0.748298	0.99209	302.49	-0.126386	0.572801	0.858124	302.49	-0.978819	1.06e-05	0.000295178	302.49	-0.824866	0.00027573
LOC107986649	16.523	1.0162	0.0925181	1	16.523	0.137279	0.797554	0.99209	16.523	0.127189	0.827112	0.953579	16.523	1.00819	0.0482044	0.167877	16.523	1.88785	0.000277456
NT5C3B	1178.44	0.0131815	0.904458	1	1178.44	-0.017567	0.872105	0.993238	1178.44	0.013868	0.901549	0.974282	1178.44	0.242888	0.0273253	0.114388	1178.44	0.409297	0.000279567
RPL37A	12139.5	0.0234042	0.866997	1	12139.5	0.0773701	0.579514	0.981647	12139.5	0.222389	0.111773	0.459987	12139.5	0.127344	0.361629	0.59925	12139.5	0.507122	0.000280401
COX4I1	10539.7	0.0200499	0.848747	1	10539.7	-0.105315	0.315946	0.927396	10539.7	0.246717	0.019091	0.217705	10539.7	0.197328	0.0602859	0.195942	10539.7	0.382172	0.000280809
RIC3	100.5	-0.253897	0.437494	1	100.5	-0.886024	0.00658998	0.424667	100.5	-0.455113	0.184593	0.566925	100.5	-0.499692	0.129828	0.324981	100.5	-1.24071	0.000281978
TWISTNB	586.254	-0.0157313	0.879051	1	586.254	0.375114	0.000169736	0.0673894	586.254	0.357053	0.000661533	0.041294	586.254	0.635293	1.76e-10	3.08e-08	586.254	0.385351	0.000282032
FAM120AOS	289.351	-0.104416	0.503951	1	289.351	0.151506	0.329769	0.934913	289.351	0.154866	0.342346	0.713507	289.351	0.454232	0.00338299	0.0255014	289.351	0.592023	0.000282332
ANKRD46	53.6827	-0.0718034	0.789995	1	53.6827	0.0391562	0.881463	0.993238	53.6827	-0.567908	0.0577347	0.347414	53.6827	-1.01691	0.000258697	0.00363075	53.6827	-1.08998	0.000285684
MRPL10	540.82	0.0431093	0.699707	1	540.82	-0.14262	0.189171	0.861376	540.82	0.105921	0.363564	0.727736	540.82	0.250288	0.0190021	0.0885363	540.82	0.393738	0.000286668
STEAP2	178.161	0.213362	0.310936	1	178.161	-0.329222	0.111059	0.777773	178.161	-0.465905	0.0309578	0.267916	178.161	-1.20227	1.72e-08	1.37e-06	178.161	-0.827138	0.000288025
LOC105377642	20.0876	-0.514793	0.4825	1	20.0876	-0.317898	0.641472	0.986263	20.0876	-0.519429	0.448933	0.787037	20.0876	-0.854913	0.190695	0.411534	20.0876	-2.45102	0.000289047
SLC5A3	202.568	0.0401124	0.772985	1	202.568	0.313827	0.0201609	0.535116	202.568	0.0586005	0.699656	0.906342	202.568	-0.778891	1.11e-07	6.68e-06	202.568	-0.526401	0.000289572
ERLEC1	271.777	0.0275117	0.866486	1	271.777	-0.0505084	0.751937	0.99209	271.777	0.109294	0.517336	0.831198	271.777	-0.133183	0.401726	0.638668	271.777	-0.576246	0.000290514
IPO8	895.109	0.125958	0.154985	1	895.109	-0.126451	0.142071	0.823458	895.109	-0.108038	0.229142	0.619077	895.109	-0.390752	7.19e-06	0.00021768	895.109	-0.332671	0.00029099
CLCN3	784.094	0.099287	0.39487	1	784.094	-0.0978386	0.392377	0.941267	784.094	-0.00140224	0.990558	0.998041	784.094	-0.549184	2.23e-06	8.26e-05	784.094	-0.430286	0.000292037
LOC100630923	330.863	0.0774407	0.646466	1	330.863	0.0589488	0.725914	0.99209	330.863	0.424736	0.0134387	0.183136	330.863	0.520309	0.00200295	0.0173493	330.863	0.624995	0.000292994
STX5	216.875	0.168182	0.234041	1	216.875	-0.0583474	0.660992	0.986879	216.875	0.0290519	0.840878	0.957281	216.875	-0.213979	0.125752	0.318347	216.875	-0.506986	0.000293991
C9orf64	91.5611	0.0651259	0.800396	1	91.5611	-0.203842	0.4118	0.944969	91.5611	-0.474445	0.0879777	0.415887	91.5611	0.375554	0.141036	0.341619	91.5611	0.983873	0.000295244
SNRPE	836.072	0.0162197	0.900762	1	836.072	0.112501	0.38144	0.941267	836.072	-0.0446185	0.736413	0.920693	836.072	0.257759	0.0440164	0.157468	836.072	0.470115	0.000295767
TRMT10C	277.748	-0.0421272	0.731438	1	277.748	0.123718	0.300521	0.924963	277.748	0.048923	0.709915	0.910359	277.748	0.323384	0.00740502	0.0457098	277.748	0.475147	0.000298291
GRIN2D	320.669	0.170352	0.376258	1	320.669	0.122918	0.522697	0.968306	320.669	-0.0329429	0.86629	0.965667	320.669	-0.10666	0.586548	0.78032	320.669	-0.742604	0.000300192
TRIP12	1264.83	-0.0431679	0.694028	1	1264.83	-0.129597	0.233345	0.88413	1264.83	-0.152003	0.173894	0.552206	1264.83	-0.131766	0.23318	0.465527	1264.83	-0.412706	0.000301995
EPC1	156.171	0.0546063	0.805476	1	156.171	0.494626	0.0197318	0.532994	156.171	0.14318	0.530063	0.837227	156.171	0.63941	0.00218487	0.018549	156.171	0.77615	0.000302037
GPRIN3	184.155	-0.577671	0.00830346	1	184.155	-0.175663	0.414549	0.945119	184.155	-0.688175	0.00291694	0.0939809	184.155	-0.763434	0.000567004	0.00672901	184.155	-0.797331	0.000302322
NET1	788.856	-0.00487614	0.964789	1	788.856	0.244972	0.0228507	0.546697	788.856	0.157619	0.160778	0.52978	788.856	0.52917	6.39e-07	2.9e-05	788.856	0.390209	0.000302937
AMZ2P1	109.685	-0.0260934	0.905442	1	109.685	0.15364	0.452603	0.95943	109.685	0.138831	0.519888	0.832453	109.685	0.757862	6.73e-05	0.00123133	109.685	0.711778	0.000303019
SLC22A17	228.815	0.263093	0.17286	1	228.815	-0.250942	0.188759	0.860948	228.815	-0.0553916	0.780337	0.935714	228.815	-0.38262	0.0414991	0.15169	228.815	-0.682397	0.000304161
PITPNC1	629.465	-0.234375	0.125609	1	629.465	-0.154482	0.304897	0.924963	629.465	0.112419	0.465606	0.798209	629.465	-0.313534	0.0372461	0.1409	629.465	-0.551302	0.000307134
ZNF829	46.3346	0.316706	0.42405	1	46.3346	0.215605	0.550593	0.975616	46.3346	0.0310458	0.9379	0.984346	46.3346	0.723159	0.0453935	0.161338	46.3346	1.32153	0.000309922
LOC105274304	69.0303	0.313916	0.43387	1	69.0303	0.471637	0.238125	0.88631	69.0303	0.304085	0.452622	0.789751	69.0303	0.944698	0.0169915	0.0818634	69.0303	1.49906	0.000311134
RFPL3S	18.6629	1.15563	0.0912066	1	18.6629	-0.0392427	0.944207	0.995732	18.6629	0.588222	0.363901	0.728053	18.6629	1.6418	0.00181868	0.0160988	18.6629	1.84343	0.000311202
ZNF232	262.121	0.198907	0.286564	1	262.121	0.207342	0.243733	0.890809	262.121	0.109793	0.562461	0.85331	262.121	0.678291	0.000129028	0.00207215	262.121	0.64975	0.000312175
PLEKHH1	225.984	-0.0609033	0.746985	1	225.984	-0.336826	0.0727521	0.730636	225.984	-0.15041	0.439742	0.782116	225.984	-0.557454	0.00321918	0.0246374	225.984	-0.727874	0.000312368
DSCC1	305.153	0.0687417	0.631585	1	305.153	-0.195461	0.16258	0.839905	305.153	-0.226392	0.126222	0.484173	305.153	-0.00947454	0.947205	0.975615	305.153	-0.546397	0.000312464
DUSP22	488.183	-0.108146	0.498975	1	488.183	-0.12088	0.446091	0.956047	488.183	-0.209848	0.200083	0.58527	488.183	-0.728456	5.66e-06	0.000178387	488.183	-0.601228	0.000313276
POLD3	504.66	0.0117975	0.936949	1	504.66	0.272897	0.0626784	0.710149	504.66	-0.0771147	0.609356	0.872161	504.66	-0.0886737	0.54926	0.753862	504.66	-0.547492	0.00031488
MAP7D3	550.449	-0.0760688	0.637041	1	550.449	0.0828177	0.604091	0.982562	550.449	0.0244742	0.881447	0.970569	550.449	-0.0722575	0.652648	0.821906	550.449	-0.595731	0.000314995
TACC3	3096.94	-0.0968555	0.469319	1	3096.94	-0.111494	0.404404	0.943368	3096.94	-0.00938987	0.944365	0.985498	3096.94	-0.243029	0.070147	0.217447	3096.94	0.485494	0.000318179
SLC9A1	309.47	-0.0134475	0.949958	1	309.47	-0.20827	0.329456	0.934913	309.47	0.145913	0.504751	0.824613	309.47	0.0997405	0.646956	0.817679	309.47	0.821368	0.000319568
ETV7	7.69712	-1.47169	0.144024	1	7.69712	1.14795	0.254627	NA	7.69712	-0.127584	0.89003	0.97154	7.69712	1.37091	0.112163	0.295641	7.69712	3.72933	0.000321271
HSPA8	2788.58	-0.139674	0.175443	1	2788.58	-0.16465	0.10838	0.777773	2788.58	-0.352721	0.000734343	0.0435645	2788.58	-0.545076	1.6e-07	8.98e-06	2788.58	-0.380231	0.000322654
TMEM39A	297.864	0.264967	0.133731	1	297.864	0.0942635	0.582442	0.981647	297.864	0.0261889	0.886171	0.970569	297.864	-0.127407	0.451843	0.679875	297.864	-0.613184	0.000326418
USP10	718.74	-0.102318	0.404213	1	718.74	0.0232161	0.848817	0.992693	718.74	0.19857	0.113107	0.461543	718.74	0.294526	0.016648	0.0807174	718.74	0.457424	0.000328453
ZNF579	570.549	0.121548	0.564374	1	570.549	0.0446063	0.832107	0.992423	570.549	0.0734994	0.730865	0.918035	570.549	0.271506	0.19759	0.420602	570.549	0.762164	0.000328771
LHPP	182.183	-0.0647428	0.71957	1	182.183	0.0805541	0.650747	0.986879	182.183	-0.192913	0.298942	0.67971	182.183	-0.312751	0.0656022	0.207688	182.183	-0.641892	0.000332594
LIMS1	604.616	-0.0821901	0.583894	1	604.616	0.136394	0.360155	0.94012	604.616	0.142635	0.350841	0.720051	604.616	-0.116774	0.44309	0.673148	604.616	-0.568522	0.000332979
OSGEPL1-AS1	3.89726	0.536261	0.630852	1	3.89726	0.818789	0.490687	NA	3.89726	-2.64905	0.066042	0.369379	3.89726	1.10785	0.342612	NA	3.89726	5.6392	0.000333025
SPTY2D1	178.003	-0.242781	0.247762	1	178.003	-0.264803	0.198655	0.86414	178.003	-0.0512054	0.817932	0.950159	178.003	0.286234	0.165103	0.376143	178.003	0.743743	0.000340433
ATPAF1	659.565	-0.00538519	0.956487	1	659.565	-0.233193	0.0162892	0.511785	659.565	0.0554673	0.593291	0.867045	659.565	0.323705	0.000980414	0.0101003	659.565	0.375585	0.000343549
TMCC1	244.595	-0.211301	0.286098	1	244.595	-0.0581288	0.765395	0.99209	244.595	0.185139	0.36437	0.728358	244.595	-0.769701	0.000142287	0.00224177	244.595	-0.745197	0.000345337
KIF21A	230.924	0.199457	0.292351	1	230.924	0.0139753	0.939147	0.99546	230.924	0.0274768	0.885458	0.970569	230.924	-0.859006	5.17e-06	0.000165662	230.924	-0.707506	0.000346802
GLRX	282.933	-0.0562127	0.700288	1	282.933	-0.161561	0.247461	0.892517	282.933	-0.212767	0.164859	0.536628	282.933	-0.341608	0.0138761	0.0708551	282.933	-0.502105	0.000348112
TIMM10	312.805	0.155347	0.380957	1	312.805	0.342102	0.0520998	0.687896	312.805	-0.180369	0.320405	0.696025	312.805	0.153106	0.385523	0.624246	312.805	0.666337	0.000348382
LOC105372766	3.76862	1.22177	0.383314	1	3.76862	-0.886452	0.550877	NA	3.76862	0	1	1	3.76862	5.48481	0.000491433	NA	3.76862	5.62249	0.000348718
URB2	100.758	0.00277055	0.987905	1	100.758	0.224605	0.20284	0.864446	100.758	0.181909	0.347988	0.717926	100.758	0.350259	0.0629083	0.201902	100.758	0.79981	0.000348862
PTK2	159.767	0.00734861	0.968952	1	159.767	-0.0252006	0.891361	0.993238	159.767	-0.0879261	0.65288	0.888552	159.767	-0.136319	0.458699	0.685359	159.767	-0.680539	0.000350875
PTAR1	624.857	0.115843	0.329496	1	624.857	0.0256502	0.824077	0.992423	624.857	0.0938392	0.433389	0.778368	624.857	-0.209803	0.0668386	0.210287	624.857	-0.416338	0.000351615
GLUD1	1134.16	0.041057	0.698082	1	1134.16	-0.14048	0.176889	0.853186	1134.16	0.114105	0.287564	0.670508	1134.16	0.035788	0.73134	0.87028	1134.16	-0.38045	0.000353634
MCM3AP-AS1	112.538	-0.487051	0.168062	1	112.538	-0.336286	0.335607	0.935706	112.538	-0.697303	0.0566888	0.344051	112.538	-0.680835	0.0601222	0.195771	112.538	-1.33325	0.000354501
C20orf27	947.19	-0.0210227	0.863552	1	947.19	-0.00907187	0.940616	0.99546	947.19	0.146903	0.237553	0.626235	947.19	0.254694	0.038904	0.145088	947.19	0.467069	0.000355633
CALML4	88.8964	-0.296265	0.158135	1	88.8964	0.177949	0.39106	0.941267	88.8964	-0.00456421	0.983985	0.996169	88.8964	-0.498945	0.0202125	0.0929429	88.8964	-0.843935	0.00035642
SNORD63	75.97	-0.215815	0.450369	1	75.97	0.486388	0.093098	0.760283	75.97	0.399757	0.178578	0.558478	75.97	0.854872	0.00431864	0.0305268	75.97	1.14713	0.000357211
NHLH2	11.6262	0.0970171	0.890411	1	11.6262	-0.431803	0.551667	0.975959	11.6262	0.138678	0.837668	0.956133	11.6262	1.80009	0.00417864	0.0298448	11.6262	2.2736	0.000358106
TBC1D32	310.346	-0.106649	0.532483	1	310.346	-0.0577057	0.726705	0.99209	310.346	-0.201641	0.255322	0.64371	310.346	-0.271335	0.103246	0.279076	310.346	-0.602494	0.000361981
SEC24A	143.499	-0.128384	0.576723	1	143.499	-0.0290684	0.897477	0.993238	143.499	-0.147681	0.537059	0.84072	143.499	-0.214755	0.336399	0.577607	143.499	-0.808967	0.000361989
QARS1	2058.98	-0.154297	0.109789	1	2058.98	-0.139985	0.144664	0.823458	2058.98	0.0209428	0.830151	0.954276	2058.98	-0.184096	0.0547874	0.183577	2058.98	-0.347367	0.000362749
SREBF2	2051.33	-0.0740967	0.605307	1	2051.33	-0.146778	0.30494	0.924963	2051.33	0.132921	0.356664	0.723523	2051.33	-0.449227	0.00171649	0.0153344	2051.33	-0.513852	0.000363507
ST3GAL6	111.279	-0.104099	0.609804	1	111.279	0.184926	0.34439	0.938294	111.279	-0.451283	0.0345617	0.279635	111.279	-0.381185	0.0521386	0.17712	111.279	-0.764091	0.000365773
YY1	1714.32	-0.0154672	0.856529	1	1714.32	-0.120616	0.152283	0.833686	1714.32	-0.0507868	0.558323	0.851928	1714.32	0.139216	0.100022	0.273465	1714.32	0.306088	0.000366494
SLC9A8	35.1262	0.00803004	0.980767	1	35.1262	0.102565	0.7589	0.99209	35.1262	0.280409	0.415275	0.764255	35.1262	1.00415	0.00214799	0.0183432	35.1262	1.31431	0.000367259
PANK3	1017.51	0.0976362	0.527693	1	1017.51	0.289248	0.0596358	0.69977	1017.51	-0.230681	0.139504	0.502157	1017.51	-0.223691	0.146996	0.349355	1017.51	-0.555265	0.000367628
TFG	1738.87	-0.0229625	0.740391	1	1738.87	-0.0117698	0.863548	0.993238	1738.87	-0.0634203	0.377226	0.736526	1738.87	-0.0268275	0.696332	0.849898	1738.87	-0.252914	0.000368541
COMMD4	681.817	0.00727073	0.950514	1	681.817	0.0483929	0.677494	0.987729	681.817	0.141789	0.238279	0.626805	681.817	0.0803107	0.495822	0.714299	681.817	0.454785	0.000368671
CGGBP1	638.694	-0.0445648	0.637515	1	638.694	0.0874463	0.332807	0.934913	638.694	-0.00739222	0.939456	0.984692	638.694	0.26281	0.00358034	0.0266026	638.694	0.332095	0.000370488
KHSRP	3353.02	-0.00502679	0.956449	1	3353.02	0.0410213	0.655229	0.986879	3353.02	-0.0577558	0.533891	0.839381	3353.02	0.0478597	0.606012	0.79303	3353.02	0.338327	0.000373519
RNF40	2915.6	0.0900675	0.440624	1	2915.6	0.0440968	0.705021	0.991919	2915.6	0.20258	0.0844952	0.408023	2915.6	0.149999	0.1994	0.423094	2915.6	0.422074	0.000374727
SHARPIN	315.281	-0.087836	0.553178	1	315.281	-0.168402	0.248348	0.892574	315.281	0.322777	0.0340069	0.277736	315.281	0.102825	0.48692	0.707288	315.281	0.552955	0.000375193
FGFBP3	23.9465	0.206242	0.652695	1	23.9465	-0.93499	0.0296073	0.58309	23.9465	-1.14671	0.0227339	0.23699	23.9465	1.04682	0.00848796	0.0505519	23.9465	1.57109	0.000375814
ADAMTS9	29.2361	-0.201712	0.633206	1	29.2361	-0.222953	0.59317	0.982562	29.2361	-0.707625	0.120868	0.475426	29.2361	-1.49539	0.000683339	0.00774257	29.2361	-1.65477	0.000380146
FOXP2	168.933	-0.113643	0.522207	1	168.933	0.0445586	0.794304	0.99209	168.933	-0.204945	0.250871	0.638808	168.933	-0.888039	6.46e-07	2.91e-05	168.933	-0.700554	0.000381058
CA3-AS1	220.111	-0.202341	0.566598	1	220.111	0.619676	0.0793688	0.742327	220.111	0.773791	0.0290716	0.259701	220.111	0.574438	0.10061	0.274349	220.111	1.27114	0.000381346
ZNF343	131.263	0.276415	0.268505	1	131.263	0.0280821	0.910191	0.993238	131.263	0.108386	0.675773	0.897475	131.263	0.525841	0.0348437	0.134719	131.263	0.930697	0.000381505
ELMOD1	93.5391	-0.0405812	0.834554	1	93.5391	-0.348278	0.0653534	0.714481	93.5391	0.279123	0.177657	0.557182	93.5391	-0.496538	0.0109831	0.0603862	93.5391	-0.765067	0.000383068
TENM3	138.565	-0.27176	0.169196	1	138.565	-0.422947	0.0318311	0.593527	138.565	-0.176815	0.396992	0.750389	138.565	-1.01369	2.94e-06	0.000104193	138.565	-0.880648	0.000384928
IVNS1ABP	436.227	0.282277	0.0302545	1	436.227	0.108097	0.393799	0.941267	436.227	-0.15053	0.254968	0.64354	436.227	-1.52e-05	0.999904	0.999904	436.227	-0.4717	0.000390794
MDGA1	82.2516	0.192916	0.580728	1	82.2516	-0.288274	0.410761	0.944969	82.2516	-0.315705	0.384341	0.741536	82.2516	-1.48595	6.03e-05	0.00114878	82.2516	-1.37616	0.000391677
RNF138P1	4.27515	1.18926	0.330007	1	4.27515	-2.17222	0.140863	NA	4.27515	2.29056	0.0503893	0.329419	4.27515	2.6642	0.0164888	NA	4.27515	5.33002	0.000391736
G0S2	87.8244	-0.0667665	0.800866	1	87.8244	0.255264	0.319628	0.930927	87.8244	-0.536368	0.0507531	0.329419	87.8244	-1.19055	6.82e-06	0.000209089	87.8244	-0.932817	0.000391905
CXCL8	9.28093	4.9524	0.000160645	0.247714	9.28093	3.62814	1.2e-05	0.0147322	9.28093	3.63497	3.53e-05	0.00796007	9.28093	3.49735	2.48e-05	0.000574764	9.28093	3.14519	0.000394046
SLC25A24	82.1258	0.0823651	0.76538	1	82.1258	0.0286237	0.91532	0.993238	82.1258	-0.0220197	0.938051	0.984346	82.1258	-0.477737	0.0801645	0.23697	82.1258	-1.07968	0.000395464
CCDC25	895.932	-0.191638	0.0934765	1	895.932	0.010883	0.922727	0.994776	895.932	-0.0174204	0.88064	0.970569	895.932	-0.0720146	0.518504	0.732379	895.932	-0.403667	0.000398386
SNORD14A	30.5276	0.40767	0.3774	1	30.5276	-0.0395554	0.930284	0.99546	30.5276	0.0418877	0.933763	0.982566	30.5276	1.05224	0.0200862	0.0925087	30.5276	1.67724	0.000398474
OSGEP	94.0587	0.117984	0.629692	1	94.0587	0.222065	0.346477	0.940013	94.0587	0.08674	0.728418	0.91786	94.0587	0.155926	0.519353	0.7329	94.0587	0.971645	0.000399847
ETNK1	215.961	0.0647323	0.678975	1	215.961	-0.164199	0.283455	0.910962	215.961	-0.0219708	0.894912	0.972293	215.961	0.0998403	0.521774	0.733802	215.961	0.600701	0.000400049
JAK1	823.855	-0.274124	0.126957	1	823.855	-0.228381	0.20241	0.864446	823.855	-0.50835	0.00575243	0.126314	823.855	-0.334219	0.0632138	0.202212	823.855	-0.646308	0.000400111
WSB1	463.755	0.155945	0.295247	1	463.755	0.267163	0.0687487	0.722955	463.755	-0.0932783	0.534194	0.839533	463.755	-0.480943	0.00111365	0.0111565	463.755	-0.531216	0.000402629
SNX15	106.977	-0.146407	0.504725	1	106.977	-0.354491	0.0959352	0.760283	106.977	0.18071	0.427158	0.773812	106.977	0.369291	0.0946907	0.263855	106.977	0.810783	0.000402994
ATPAF2	577.318	0.0312504	0.813228	1	577.318	0.181766	0.163858	0.843	577.318	-0.0662998	0.62341	0.877846	577.318	0.297883	0.0232795	0.10241	577.318	0.482388	0.000403077
MAP9	281.603	0.0138091	0.946082	1	281.603	-0.0703633	0.724728	0.99209	281.603	-0.2297	0.270567	0.65505	281.603	-0.307645	0.130961	0.32692	281.603	-0.759214	0.000403604
PDCD6	599.105	0.12434	0.310057	1	599.105	0.0623235	0.605769	0.982743	599.105	0.0322666	0.796424	0.941524	599.105	-0.0692554	0.570443	0.768473	599.105	-0.455399	0.000404441
GNB4	194.319	0.00320018	0.983442	1	194.319	0.0610926	0.67951	0.987729	194.319	-0.0428779	0.786265	0.93768	194.319	-0.342224	0.0278527	0.116128	194.319	-0.587511	0.000404718
CRNDE	439.066	0.0275431	0.857017	1	439.066	0.0292696	0.845623	0.992693	439.066	-0.185893	0.238214	0.626805	439.066	-0.215556	0.15252	0.357744	439.066	-0.544021	0.000405503
ARRDC3	128.167	0.0982965	0.736995	1	128.167	0.137485	0.626598	0.986217	128.167	-0.106722	0.727822	0.917749	128.167	1.4901	4.18e-08	2.93e-06	128.167	0.963403	0.000407029
HLF	27.327	0.406658	0.487409	1	27.327	0.765994	0.175978	0.852901	27.327	1.36389	0.0217105	0.233366	27.327	0.29662	0.600924	0.790243	27.327	2.12242	0.000410156
C1orf109	130.731	0.146614	0.350147	1	130.731	0.361415	0.0194558	0.532994	130.731	0.222441	0.190185	0.5731	130.731	0.332117	0.029682	0.121149	130.731	0.607067	0.000410638
TSPAN10	35.7529	-0.234901	0.552409	1	35.7529	0.252802	0.513445	0.968306	35.7529	0.109676	0.784354	0.936849	35.7529	0.420147	0.329445	0.570959	35.7529	1.97645	0.000412643
ARF6	682.67	0.051833	0.60557	1	682.67	0.00277682	0.977241	0.999254	682.67	-0.0543383	0.59982	0.867964	682.67	0.469121	2.11e-06	7.89e-05	682.67	0.36709	0.000414461
UBALD2	596.8	-0.0818171	0.524687	1	596.8	0.0148497	0.90708	0.993238	596.8	0.32816	0.0125816	0.18007	596.8	0.230896	0.0710773	0.219487	596.8	0.452112	0.000416145
NPHP3-ACAD11	453.456	0.0444728	0.756144	1	453.456	0.0945901	0.499234	0.965453	453.456	-0.231979	0.110407	0.456688	453.456	-0.469827	0.000703477	0.00790921	453.456	-0.50615	0.000416776
ZKSCAN1	982.139	0.149209	0.205649	1	982.139	0.0106479	0.927513	0.995211	982.139	0.0472944	0.693466	0.9039	982.139	-0.315638	0.00815916	0.049158	982.139	-0.430221	0.000417326
SPNS1	23.1474	0.125149	0.721909	1	23.1474	-0.120767	0.725727	0.99209	23.1474	0.108284	0.788278	0.938665	23.1474	-0.0439477	0.904681	0.957446	23.1474	1.73863	0.000420426
KCTD10	639.085	-0.00991249	0.926563	1	639.085	-0.115631	0.279548	0.907858	639.085	0.152563	0.172882	0.550976	639.085	0.175944	0.103986	0.280414	639.085	0.394939	0.000422275
OXT	3.46515	-2.01426	0.317713	1	3.46515	-0.843471	0.613919	NA	3.46515	-2.52905	0.200686	0.58527	3.46515	3.97214	0.0266582	NA	3.46515	6.61824	0.000423392
EPHB1	76.5967	-0.186816	0.485504	1	76.5967	0.0778957	0.766923	0.99209	76.5967	-0.134112	0.637127	0.882924	76.5967	-0.29806	0.281682	0.52103	76.5967	-1.1657	0.000425613
KIAA1324L	43.3304	-0.2454	0.452863	1	43.3304	-0.195653	0.542052	0.973942	43.3304	-0.689162	0.0495172	0.327443	43.3304	0.12147	0.69722	0.850482	43.3304	-1.25812	0.000427643
THRB	49.9896	-0.0608929	0.846425	1	49.9896	-0.277655	0.366553	0.94012	49.9896	-0.135214	0.676881	0.897949	49.9896	-0.844126	0.00876876	0.0517164	49.9896	-1.26554	0.000429652
ZNF792	139.044	-0.231749	0.442826	1	139.044	0.0504911	0.86581	0.993238	139.044	0.182586	0.551591	0.849101	139.044	0.176832	0.552704	0.756272	139.044	1.0495	0.000429797
ZNF263	120.002	-0.22492	0.272192	1	120.002	0.0332058	0.868304	0.993238	120.002	0.308733	0.153601	0.520766	120.002	0.454588	0.0208909	0.0950397	120.002	0.705794	0.000431314
RNF114	686.552	0.441981	0.000116653	0.220178	686.552	0.263144	0.0194732	0.532994	686.552	0.336892	0.00385691	0.109394	686.552	0.610222	4.33e-08	3.03e-06	686.552	0.40322	0.000432575
ZNF407	43.4681	0.0391562	0.905564	1	43.4681	0.828764	0.0117564	0.481339	43.4681	0.41882	0.22189	0.610591	43.4681	0.166256	0.62625	0.806134	43.4681	1.34387	0.000432972
TMEM167B	306.639	0.163396	0.28172	1	306.639	-0.140247	0.340269	0.938294	306.639	0.146649	0.349096	0.719056	306.639	0.360057	0.0144212	0.0730074	306.639	-0.522633	0.000434319
ZNF212	256.919	-0.0749439	0.620217	1	256.919	0.130974	0.380279	0.941267	256.919	0.192417	0.215115	0.602067	256.919	0.353658	0.0179225	0.0850237	256.919	0.536127	0.000435473
PIK3CB	89.7954	-0.243788	0.325489	1	89.7954	-0.267316	0.263564	0.899985	89.7954	-0.151492	0.552158	0.849203	89.7954	-0.760052	0.0029516	0.0229647	89.7954	-0.914368	0.000439941
ZNF609	189.68	0.493166	0.171346	1	189.68	-0.0322904	0.928525	0.995428	189.68	-0.440977	0.22841	0.617852	189.68	0.567918	0.115244	0.301071	189.68	-1.31979	0.000441463
CDK6	269.988	0.0576944	0.707625	1	269.988	-0.165802	0.271369	0.901893	269.988	-0.39015	0.0165713	0.200286	269.988	-0.340133	0.0265042	0.112016	269.988	-0.588055	0.000442171
POLR2J4	21.9147	-0.0187251	0.969933	1	21.9147	-0.295918	0.540103	0.973942	21.9147	0.0854651	0.872975	0.968567	21.9147	1.72837	0.00114832	0.0114276	21.9147	2.01129	0.000442806
PIK3R3	215.376	-0.0742966	0.705855	1	215.376	0.0293585	0.879615	0.993238	215.376	0.345096	0.0852491	0.410142	215.376	0.673019	0.000683858	0.00774257	215.376	0.758204	0.000445657
TRAPPC6B	263.243	0.206957	0.144654	1	263.243	0.059577	0.662289	0.986879	263.243	0.269905	0.0634364	0.363303	263.243	-0.282499	0.0421713	0.15303	263.243	-0.505035	0.000445807
GTF3A	412.605	-0.219389	0.122807	1	412.605	-0.0435297	0.755934	0.99209	412.605	0.070873	0.628119	0.879536	412.605	0.171443	0.224815	0.455653	412.605	0.519876	0.000446366
ZBED5	281.004	-0.0209033	0.880373	1	281.004	-0.195169	0.144554	0.823458	281.004	-0.11109	0.457463	0.793382	281.004	0.27995	0.0401	0.148204	281.004	0.501785	0.000446375
TOB1-AS1	24.5861	0.375373	0.49472	1	24.5861	-0.0269626	0.955198	0.996064	24.5861	1.0799	0.0317489	0.269139	24.5861	0.389314	0.391231	0.629599	24.5861	1.64062	0.000447008
DYNC2H1	850.106	-0.0306513	0.678378	1	850.106	-0.0470654	0.507745	0.968306	850.106	-0.109619	0.149766	0.51654	850.106	-0.176552	0.0141821	0.0720061	850.106	-0.291976	0.00044727
ASCC2	492.528	0.0853554	0.435933	1	492.528	0.0797489	0.463547	0.961004	492.528	-0.000739875	0.994871	0.999323	492.528	0.18798	0.092419	0.26017	492.528	0.426921	0.00044767
TNNT1	121.856	-0.267269	0.210375	1	121.856	-0.329611	0.107395	0.775887	121.856	0.104138	0.627395	0.879315	121.856	-0.0911555	0.655057	0.823472	121.856	-0.720829	0.000448635
SGMS1-AS1	10.9368	0.222892	0.73022	1	10.9368	0.291969	0.654241	0.986879	10.9368	0.312216	0.645352	0.885456	10.9368	1.47438	0.0265128	0.11202	10.9368	2.52899	0.000450804
STAG1	613.604	0.201311	0.293607	1	613.604	0.46098	0.0156725	0.50776	613.604	0.150128	0.438105	0.781155	613.604	0.342505	0.0761389	0.229073	613.604	0.698663	0.000451511
LOC100499489	33.7729	-0.475776	0.212654	1	33.7729	0.445438	0.238532	0.88631	33.7729	-0.208161	0.592032	0.866682	33.7729	0.20149	0.593129	0.784824	33.7729	1.3513	0.000453467
PSAT1	4924.16	-0.112456	0.350415	1	4924.16	-0.309128	0.0100856	0.467701	4924.16	-0.120701	0.318708	0.694524	4924.16	-0.231247	0.0552661	0.184584	4924.16	-0.425214	0.000454735
RSPH3	248.181	0.339076	0.0358373	1	248.181	0.14638	0.357569	0.94012	248.181	-0.150364	0.355856	0.723302	248.181	-0.368446	0.0212175	0.0960779	248.181	-0.589225	0.000456201
PPIC	234.998	-0.0606393	0.716906	1	234.998	0.0477388	0.768003	0.99209	234.998	-0.692892	8.38e-05	0.0134265	234.998	-0.416618	0.011701	0.0632792	234.998	-0.598682	0.000456592
PELI2	79.94	0.0216435	0.932711	1	79.94	0.0416598	0.867198	0.993238	79.94	-0.164317	0.54175	0.843813	79.94	0.149641	0.551639	0.755657	79.94	-0.949541	0.000457609
C11orf68	574.884	-0.0272995	0.820711	1	574.884	0.044921	0.705175	0.991919	574.884	0.283755	0.020429	0.224929	574.884	-0.711652	4.28e-09	4.42e-07	574.884	-0.425845	0.000457897
TPTEP2-CSNK1E	1313.79	-0.0529303	0.592715	1	1313.79	0.0463759	0.636263	0.986217	1313.79	-0.0100132	0.920571	0.979351	1313.79	-0.0230952	0.814743	0.914249	1313.79	-0.349716	0.000458077
HK2	154.971	0.304575	0.116989	1	154.971	-0.0219833	0.90628	0.993238	154.971	-0.363448	0.0665001	0.370157	154.971	-0.417684	0.0301958	0.122555	154.971	-0.782138	0.000458169
RC3H1	103.579	-0.045862	0.87205	1	103.579	-0.194096	0.491316	0.964518	103.579	0.121864	0.678127	0.898468	103.579	0.797832	0.00504016	0.0339814	103.579	1.02617	0.000459797
MON1B	428.768	-0.277266	0.0509655	1	428.768	0.148203	0.292002	0.915766	428.768	0.0154227	0.915489	0.977981	428.768	0.000162282	0.999091	0.999435	428.768	0.522662	0.00046139
RAD54B	504.001	0.0885242	0.550801	1	504.001	0.261089	0.0728755	0.730636	504.001	-0.0663408	0.65966	0.890888	504.001	-0.220375	0.133037	0.329721	504.001	-0.524063	0.000463157
ZNF747	168.699	-0.00277096	0.989192	1	168.699	0.287181	0.156601	0.837896	168.699	0.0591651	0.781111	0.935714	168.699	0.269091	0.19041	0.411164	168.699	0.764462	0.000463869
KCNMB4	249.94	-0.00937554	0.960122	1	249.94	-0.39839	0.0278099	0.582815	249.94	-0.457748	0.0174741	0.207174	249.94	-0.469029	0.0102581	0.0575104	249.94	-0.650777	0.000466496
WRAP53	147.298	0.0619865	0.750376	1	147.298	0.0923158	0.634122	0.986217	147.298	0.22541	0.27306	0.657298	147.298	0.246909	0.216869	0.445881	147.298	0.734635	0.000469868
RBBP4	1895.46	0.0396797	0.53583	1	1895.46	0.0249903	0.691292	0.988849	1895.46	0.0186939	0.774996	0.934514	1895.46	-0.21123	0.000924855	0.00969021	1895.46	-0.230696	0.00047012
ERH	2003.36	0.129444	0.200919	1	2003.36	0.065436	0.51346	0.968306	2003.36	0.043328	0.67155	0.89631	2003.36	0.275485	0.00597962	0.0386559	2003.36	0.353236	0.000470792
TOP2B	1559.09	-0.0293212	0.76428	1	1559.09	-0.182256	0.0587671	0.69925	1559.09	-0.283432	0.00426483	0.114077	1559.09	-0.328285	0.000710849	0.00796129	1559.09	-0.349092	0.000476979
NIT2	374.603	0.330233	0.0216931	1	374.603	0.123668	0.377338	0.941267	374.603	-0.0901794	0.548235	0.846871	374.603	-0.601551	2.01e-05	0.000486494	374.603	-0.510075	0.000477824
CGRRF1	174.681	0.31574	0.176299	1	174.681	0.599621	0.0086722	0.454114	174.681	0.370257	0.113412	0.462181	174.681	1.01555	4.81e-06	0.000155629	174.681	0.779216	0.000478371
MRPS17	176.222	0.150816	0.33736	1	176.222	0.135507	0.378637	0.941267	176.222	0.305793	0.0605	0.355026	176.222	0.483397	0.00189328	0.0165873	176.222	0.585699	0.000478817
BANP	101.079	0.02196	0.927469	1	101.079	-0.0215986	0.928211	0.995413	101.079	0.0333776	0.896031	0.972721	101.079	0.619069	0.0111312	0.0609696	101.079	0.910332	0.000480726
TOR1AIP2	848.103	-0.0486501	0.597567	1	848.103	0.0755277	0.408819	0.944969	848.103	0.165513	0.082006	0.404009	848.103	0.313885	0.000749514	0.00829204	848.103	0.344765	0.000483402
SLC35F1	265.206	0.121512	0.461953	1	265.206	-0.049308	0.759686	0.99209	265.206	-0.209054	0.215209	0.60216	265.206	-0.647972	6.52e-05	0.00121142	265.206	-0.598278	0.000483718
B4GALT1	162.975	0.146628	0.532927	1	162.975	-0.144376	0.53161	0.968963	162.975	-0.00246925	0.991738	0.998278	162.975	-0.0388245	0.868069	0.93989	162.975	-0.862578	0.000484564
CPNE2	261.088	-0.0878557	0.608737	1	261.088	-0.0478614	0.779176	0.99209	261.088	0.075762	0.670553	0.895878	261.088	-0.545507	0.00205264	0.0176638	261.088	-0.643287	0.000484813
LOC110117498-PIK3R3	215.002	-0.0638707	0.747672	1	215.002	0.0267927	0.890995	0.993238	215.002	0.337413	0.0951329	0.431629	215.002	0.673028	0.000755715	0.00834395	215.002	0.758348	0.000486625
LINC00680	27.1044	0.281277	0.542795	1	27.1044	0.309291	0.495544	0.964518	27.1044	0.222599	0.65041	0.887597	27.1044	1.09821	0.0254395	0.109233	27.1044	1.98514	0.000490139
FAM171A1	889.821	-0.206337	0.125499	1	889.821	-0.074188	0.580797	0.981647	889.821	-0.0635587	0.643537	0.885337	889.821	-0.201255	0.139491	0.339439	889.821	-0.487837	0.000491244
LOC101929243	156.436	-0.341545	0.176925	1	156.436	-0.124684	0.612061	0.983834	156.436	0.179801	0.473309	0.802602	156.436	0.439355	0.0593292	0.194015	156.436	0.805422	0.000492779
CLNS1A	1590	0.0886112	0.479498	1	1590	-0.00207002	0.986725	0.999254	1590	0.259103	0.0397708	0.295116	1590	0.0148133	0.905348	0.957696	1590	-0.439818	0.000493242
CALHM5	13.396	-0.19963	0.789217	1	13.396	0.436637	0.534975	0.970285	13.396	0.187239	0.818729	0.950745	13.396	1.42976	0.0369423	0.140347	13.396	2.6679	0.000494522
AURKA	1607.19	-0.120465	0.315098	1	1607.19	-0.279876	0.0186602	0.532205	1607.19	0.0636672	0.60075	0.868506	1607.19	0.246118	0.0387641	0.144976	1607.19	0.41546	0.000498523
SRSF3	3436.13	0.141581	0.172206	1	3436.13	0.178171	0.0845433	0.751929	3436.13	-0.089837	0.390027	0.744527	3436.13	0.587273	1.48e-08	1.22e-06	3436.13	0.366055	0.000499995
HINT2	183.618	0.0170779	0.917236	1	183.618	-0.029449	0.851536	0.992936	183.618	0.523914	0.00146694	0.0642271	183.618	0.360052	0.0213602	0.0965095	183.618	0.567896	0.000500287
ANKRD37	74.5829	0.366005	0.247699	1	74.5829	-0.129926	0.665038	0.986951	74.5829	-0.710449	0.0244616	0.242422	74.5829	-1.06144	0.000211203	0.00307717	74.5829	-1.05526	0.000500433
KTI12	108.63	0.232012	0.275087	1	108.63	0.153465	0.451939	0.959348	108.63	0.376677	0.0955602	0.432467	108.63	0.586717	0.00373467	0.0273437	108.63	0.711493	0.000500672
SNRNP25	369.37	-0.191946	0.114835	1	369.37	0.0207858	0.861891	0.993238	369.37	0.0738285	0.560289	0.852434	369.37	0.294136	0.0185133	0.0868897	369.37	0.46833	0.000500956
FGD5-AS1	350.8	-0.113439	0.368547	1	350.8	0.0666635	0.587268	0.981647	350.8	-0.0131055	0.923353	0.980104	350.8	0.551958	4.77e-06	0.000154783	350.8	0.419605	0.000502488
MRTO4	427.066	0.264639	0.0645631	1	427.066	0.364031	0.00982958	0.465957	427.066	0.237812	0.104755	0.447232	427.066	0.630349	1.18e-05	0.000319073	427.066	0.540575	0.000503384
MRPL32	244.248	0.230674	0.166712	1	244.248	0.209039	0.195417	0.86414	244.248	0.0625737	0.71561	0.911977	244.248	0.502689	0.00141605	0.0133742	244.248	0.569142	0.000503572
CASTOR2	388.959	-0.269669	0.0506472	1	388.959	-0.294583	0.0331426	0.601161	388.959	-0.0274768	0.849821	0.95966	388.959	0.115894	0.413221	0.648563	388.959	0.511785	0.000504021
DYNC1LI2	462.518	0.124549	0.297862	1	462.518	0.0742297	0.528381	0.968638	462.518	0.00491216	0.968404	0.992215	462.518	-0.0467229	0.694953	0.849166	462.518	-0.425482	0.000505263
CFAP36	427.845	0.0243625	0.876398	1	427.845	0.267475	0.0808664	0.745824	427.845	-0.304501	0.0598419	0.353567	427.845	-0.224039	0.142183	0.343253	427.845	-0.540651	0.000506616
ZNF791	334.048	0.234981	0.178641	1	334.048	0.303515	0.0770596	0.739361	334.048	0.391481	0.0286901	0.258635	334.048	0.555609	0.00125811	0.0123565	334.048	0.611615	0.000506806
NDUFS6	1191.27	-0.0194929	0.852607	1	1191.27	0.0672636	0.517183	0.968306	1191.27	0.0531539	0.616679	0.874916	1191.27	0.224368	0.0313328	0.125765	1191.27	0.371503	0.000507903
WHRN	538.815	0.115722	0.446281	1	538.815	-0.061063	0.684899	0.987729	538.815	0.126434	0.411495	0.760959	538.815	-0.763442	6.63e-07	2.97e-05	538.815	-0.54027	0.000509174
ATP5MF-PTCD1	446.363	0.0798512	0.504924	1	446.363	0.106699	0.371233	0.94012	446.363	0.358623	0.00409561	0.112279	446.363	0.569443	2.42e-06	8.87e-05	446.363	0.446214	0.000510691
MRPL52	505.868	0.0855132	0.628544	1	505.868	-0.0562893	0.748977	0.99209	505.868	-0.0135105	0.940208	0.984715	505.868	0.456826	0.00964431	0.0552636	505.868	0.626874	0.000510898
PSMD10	665.166	0.0221872	0.82649	1	665.166	-0.0472018	0.632258	0.986217	665.166	0.101686	0.334903	0.707683	665.166	0.208734	0.0338866	0.132432	665.166	0.347253	0.000512396
GPATCH8	609.19	-0.102089	0.419211	1	609.19	0.128635	0.304328	0.924963	609.19	0.120143	0.350534	0.720051	609.19	0.347374	0.00591564	0.0382935	609.19	0.450702	0.000513421
SOCS2	115.898	-0.313323	0.112103	1	115.898	-0.164193	0.356022	0.94012	115.898	0.463861	0.0175586	0.207174	115.898	0.262062	0.138761	0.33882	115.898	0.626874	0.000516125
ARL15	197.227	-0.0485215	0.748456	1	197.227	0.0758185	0.590889	0.982562	197.227	0.372546	0.0156164	0.194676	197.227	-0.230594	0.121805	0.31224	197.227	-0.561329	0.000517209
MTG1	190.912	0.130316	0.476877	1	190.912	0.0349328	0.847925	0.992693	190.912	0.398807	0.034991	0.280199	190.912	0.0627264	0.738809	0.874364	190.912	0.768071	0.000517818
SH3YL1	36.2214	0.0411	0.902589	1	36.2214	-0.164167	0.586923	0.981647	36.2214	-0.200625	0.569399	0.856875	36.2214	-0.831521	0.00757615	0.0465529	36.2214	-1.13972	0.000518192
KLF7	136.395	0.303411	0.249596	1	136.395	-0.484518	0.0633288	0.710761	136.395	0.767251	0.00492036	0.120115	136.395	-0.0712538	0.780148	0.898693	136.395	-0.906301	0.000526423
ANKRD39	142.471	0.053672	0.803287	1	142.471	-0.248814	0.239765	0.88838	142.471	0.77614	0.000494292	0.0363859	142.471	0.680935	0.00169754	0.0152255	142.471	0.79648	0.000532425
CHMP1A	253.047	0.189711	0.245471	1	253.047	-0.38494	0.0175891	0.526893	253.047	0.254732	0.131487	0.490262	253.047	0.418842	0.01274	0.0670393	253.047	0.615675	0.000533832
HMMR	382.75	-0.0728746	0.539922	1	382.75	-0.106556	0.350544	0.94012	382.75	-0.45006	0.000355061	0.0300437	382.75	0.0433077	0.700083	0.852424	382.75	0.394727	0.000536585
CTTN	197.942	-0.0273381	0.840273	1	197.942	-0.281046	0.0332094	0.601161	197.942	-0.0690341	0.625983	0.878969	197.942	-0.350079	0.0153785	0.0762746	197.942	-0.574732	0.000537158
ADAMTS7	156.589	0.458145	0.0545278	1	156.589	-0.19986	0.395037	0.941395	156.589	-0.199093	0.415293	0.764255	156.589	-1.11077	3.54e-06	0.000121175	156.589	-0.874149	0.000537981
GUCY1B2	28.8411	-0.117672	0.816183	1	28.8411	-0.524428	0.281776	0.908544	28.8411	-0.449174	0.362743	0.727338	28.8411	-0.788358	0.113929	0.298671	28.8411	-2.08579	0.000537992
PRDX2	1018.15	0.0825198	0.404807	1	1018.15	-0.221345	0.0240348	0.554113	1018.15	0.201042	0.0458653	0.316556	1018.15	0.165054	0.0964139	0.267426	1018.15	0.360652	0.000540398
TBC1D16	232.691	-0.324221	0.0348304	1	232.691	-0.0562973	0.711849	0.99209	232.691	0.190169	0.222312	0.61071	232.691	-0.960965	1.93e-09	2.34e-07	232.691	-0.61986	0.000543857
HNRNPU	3176.82	-0.0226537	0.800872	1	3176.82	0.019556	0.826723	0.992423	3176.82	-0.0417931	0.643899	0.885445	3176.82	0.0684942	0.445668	0.674843	3176.82	0.320185	0.000545486
LOC107984564	5.77189	0.485546	0.759211	1	5.77189	3.85045	0.0346587	NA	5.77189	-4.87454	0.0110989	0.170633	5.77189	0.833179	0.592168	0.783981	5.77189	6.6036	0.000549919
NDNF	51.0001	-0.209543	0.548494	1	51.0001	-0.128034	0.709757	0.99209	51.0001	-0.454233	0.200845	0.58527	51.0001	-1.48681	3.29e-05	0.000718212	51.0001	-1.29699	0.000550239
SARAF	140.11	-0.0893654	0.662725	1	140.11	-0.0510881	0.798762	0.99209	140.11	-0.0563771	0.790972	0.939441	140.11	-0.192581	0.340208	0.580235	140.11	-0.734907	0.000551436
SCAND2P	51.426	0.118134	0.711355	1	51.426	-0.136707	0.653478	0.986879	51.426	0.572305	0.0727778	0.38515	51.426	0.535295	0.0848679	0.245664	51.426	1.18704	0.000555444
SOX15	6.96837	-0.446829	0.688884	1	6.96837	-0.0046823	0.996317	NA	6.96837	-3.53138	0.0187848	0.215319	6.96837	1.26739	0.183225	0.402469	6.96837	3.71114	0.000556237
CHST14	175.145	0.220816	0.248761	1	175.145	-0.0253197	0.891663	0.993238	175.145	-0.241066	0.226041	0.61519	175.145	0.0671317	0.726241	0.867488	175.145	0.669457	0.000559232
FAM32A	528.396	-0.0265979	0.786389	1	528.396	0.0840847	0.376594	0.941267	528.396	0.0670892	0.514438	0.829364	528.396	0.278813	0.00366091	0.0269667	528.396	0.345944	0.000562133
AMIGO1	62.851	0.164485	0.577288	1	62.851	0.181459	0.531132	0.968963	62.851	-0.293025	0.342248	0.713507	62.851	-0.0188332	0.948026	0.976195	62.851	1.03327	0.000562708
RNF41	515.159	-0.0240373	0.879336	1	515.159	0.0343726	0.826303	0.992423	515.159	-0.297487	0.0678198	0.373273	515.159	-0.282499	0.0756311	0.228317	515.159	-0.550619	0.000564357
BASP1	626.007	0.152126	0.337918	1	626.007	-0.115966	0.456082	0.961004	626.007	0.157248	0.32724	0.701654	626.007	-0.157294	0.311278	0.55253	626.007	-0.530922	0.000566702
AKT1S1	140.723	-0.119114	0.458855	1	140.723	0.117942	0.458781	0.961004	140.723	0.328675	0.0479675	0.3235	140.723	0.288124	0.0925701	0.260443	140.723	0.64415	0.000569891
LRRC27	54.429	0.103615	0.791888	1	54.429	0.611337	0.121689	0.805537	54.429	-0.0136631	0.972986	0.99367	54.429	-0.374646	0.333699	0.575212	54.429	1.38583	0.000570589
MRPL58	582.553	-0.175215	0.166872	1	582.553	0.32307	0.00862889	0.454114	582.553	0.240477	0.0597896	0.353484	582.553	0.250078	0.0371678	0.140824	582.553	0.420994	0.000578346
SMIM2-AS1	6.99236	2.59062	0.0137857	1	6.99236	-0.994576	0.198278	NA	6.99236	0.89238	0.288919	0.671835	6.99236	2.25493	0.00880828	0.0518642	6.99236	4.8109	0.0005797
RGS19	130.148	-0.327891	0.0407474	1	130.148	0.0529005	0.738125	0.99209	130.148	0.228684	0.194405	0.579426	130.148	-0.603926	0.000395443	0.00508786	130.148	-0.670229	0.00058066
TNIP1	231.201	0.165566	0.24575	1	231.201	-0.0677129	0.628861	0.986217	231.201	-0.0329641	0.824327	0.952776	231.201	-0.602783	2.96e-05	0.000658949	231.201	-0.524935	0.000585703
SCOC	686.463	-0.0653785	0.519044	1	686.463	0.0244967	0.802071	0.99209	686.463	0.0126067	0.902978	0.974422	686.463	-0.0755783	0.437791	0.668872	686.463	-0.344652	0.000585833
TRMT1	94.2742	-0.0851159	0.719509	1	94.2742	0.156561	0.50894	0.968306	94.2742	0.12615	0.611228	0.872616	94.2742	0.340496	0.159551	0.36806	94.2742	0.978437	0.000587559
ARHGAP22	49.5451	-0.14019	0.565903	1	49.5451	-0.245047	0.287557	0.913805	49.5451	-0.369769	0.159746	0.529185	49.5451	-0.525468	0.0496026	0.171106	49.5451	-1.06724	0.000587865
SLIT3	55.2384	-0.530368	0.13253	1	55.2384	-0.566783	0.101589	0.765818	55.2384	-0.974383	0.00876095	0.15403	55.2384	-0.84585	0.0150973	0.0754138	55.2384	-1.23968	0.000588314
UQCC3	204.23	0.0267696	0.856873	1	204.23	0.201414	0.144149	0.823458	204.23	0.137869	0.354161	0.721534	204.23	0.270683	0.049289	0.170365	204.23	0.494311	0.000589351
RPS6KB1	490.887	0.0333058	0.792616	1	490.887	0.0266892	0.830434	0.992423	490.887	-0.121423	0.358356	0.725033	490.887	-0.415115	0.00111035	0.011131	490.887	-0.444553	0.000590006
RNF216P1	1443.55	0.223113	0.0722947	1	1443.55	0.0850116	0.490402	0.964518	1443.55	0.0825925	0.51206	0.829093	1443.55	-0.0668846	0.591657	0.7838	1443.55	-0.432996	0.000593086
C6orf89	564.565	-0.181942	0.113514	1	564.565	-0.0186964	0.868805	0.993238	564.565	-0.13476	0.255522	0.643933	564.565	-0.562499	1.36e-06	5.43e-05	564.565	-0.413414	0.000593496
ORC5	1026.62	0.195574	0.114732	1	1026.62	0.219489	0.0717537	0.729182	1026.62	0.370398	0.00308382	0.0956619	1026.62	0.55295	5.72e-06	0.000179754	1026.62	0.42814	0.000595024
SLC4A5	29.4399	-0.607491	0.22575	1	29.4399	-0.475313	0.314746	0.926448	29.4399	-0.259362	0.645491	0.885456	29.4399	-0.297394	0.517857	0.731892	29.4399	-1.63187	0.000596644
LPAR3	94.4913	-0.326827	0.091617	1	94.4913	-0.0340506	0.859232	0.993238	94.4913	-0.32355	0.122626	0.47929	94.4913	-0.996215	1.02e-06	4.23e-05	94.4913	-0.814768	0.000601449
GTF2H3	215.005	-0.00653617	0.97404	1	215.005	0.177733	0.36559	0.94012	215.005	-0.0145137	0.943749	0.985468	215.005	-0.0731502	0.71331	0.85988	215.005	0.73015	0.000603183
RPS6KA3	437.327	0.00399366	0.96988	1	437.327	-0.0519137	0.615925	0.984867	437.327	0.157851	0.149662	0.51654	437.327	-0.255647	0.016531	0.0802302	437.327	-0.389968	0.000604507
UTRN	286.134	0.090086	0.572778	1	286.134	-0.38882	0.0140224	0.494605	286.134	-0.0927609	0.572644	0.858054	286.134	-0.427025	0.00784774	0.0478775	286.134	-0.586686	0.00060511
BMP6	35.2656	-0.126076	0.758094	1	35.2656	0.0977232	0.808651	0.99209	35.2656	-0.793968	0.0715744	0.382753	35.2656	-0.124408	0.757653	0.88641	35.2656	-1.5614	0.000605654
AFG3L1P	144.623	0.0595195	0.675	1	144.623	-0.357233	0.00981497	0.465957	144.623	-0.249682	0.12264	0.47929	144.623	0.242051	0.0973869	0.268977	144.623	0.559852	0.000608725
LOC283335	35.4754	0.00956355	0.984603	1	35.4754	-0.282118	0.563716	0.978206	35.4754	-0.615476	0.21902	0.60726	35.4754	-0.113092	0.819897	0.916634	35.4754	1.90937	0.000617066
LOC107984754	57.6795	0.0904442	0.721872	1	57.6795	0.453603	0.0748752	0.734099	57.6795	0.550719	0.0353046	0.280829	57.6795	0.0169771	0.950167	0.977142	57.6795	1.30161	0.000617564
MYO6	1081.56	-0.059316	0.817754	1	1081.56	0.130748	0.610684	0.983642	1081.56	-0.156925	0.542947	0.844334	1081.56	-0.0978968	0.703275	0.853884	1081.56	-0.887816	0.000623529
C8orf76	138.228	0.201827	0.263886	1	138.228	0.398715	0.021531	0.544542	138.228	-0.0552975	0.77744	0.935036	138.228	0.399711	0.0215884	0.0971479	138.228	0.63812	0.000627251
BEAN1	4.55468	-0.883907	0.480677	1	4.55468	-0.537794	0.593528	NA	4.55468	1.86517	0.2112	0.598156	4.55468	-0.87108	0.355498	NA	4.55468	-4.94925	0.000628924
MOSPD3	391.138	-0.145312	0.421712	1	391.138	-0.232444	0.196624	0.86414	391.138	0.240827	0.19312	0.577137	391.138	-0.111541	0.544233	0.750692	391.138	0.64334	0.00063301
TMED5	480.54	-0.0295887	0.821694	1	480.54	0.0188278	0.883873	0.993238	480.54	-0.168765	0.21767	0.605341	480.54	-0.0378791	0.769396	0.892671	480.54	-0.454375	0.000635469
ZNF211	50.249	0.445845	0.210479	1	50.249	-0.223692	0.509836	0.968306	50.249	0.27167	0.460442	0.795625	50.249	1.45703	1.58e-05	0.000401809	50.249	1.17498	0.000637569
ZNF174	154.072	0.102814	0.611066	1	154.072	0.0973101	0.628599	0.986217	154.072	0.156206	0.459803	0.794873	154.072	0.0650841	0.753223	0.883923	154.072	0.733399	0.000637704
ME2	195.475	-0.431689	0.0142215	1	195.475	-0.211144	0.215537	0.875606	195.475	0.166634	0.350285	0.719886	195.475	-0.301871	0.0836	0.243264	195.475	-0.651601	0.000638446
CHST1	31.885	0.0115776	0.98485	1	31.885	-0.633535	0.289822	0.914313	31.885	-0.875191	0.161312	0.530639	31.885	-1.05555	0.0805479	0.237675	31.885	-2.13492	0.000641179
UBE2V2	1409.1	0.0902232	0.257357	1	1409.1	0.0947046	0.223876	0.878205	1409.1	0.0706951	0.385681	0.74239	1409.1	-0.11634	0.136106	0.334701	1409.1	-0.272858	0.00064182
RPL21	62.9999	-0.0458046	0.862246	1	62.9999	0.338445	0.153942	0.835289	62.9999	0.0567689	0.823989	0.952566	62.9999	0.323822	0.150354	0.354236	62.9999	0.757925	0.000647241
COL13A1	21.9867	0.297034	0.589221	1	21.9867	-0.346181	0.505407	0.968306	21.9867	-0.350889	0.515485	0.83045	21.9867	-1.03694	0.0577634	0.190222	21.9867	-2.06115	0.00064781
OSER1	274.395	0.023087	0.899097	1	274.395	0.150512	0.396542	0.941983	274.395	0.112904	0.542282	0.844121	274.395	0.639629	0.000247893	0.00352338	274.395	0.599071	0.000648059
TWNK	81.6034	-0.242853	0.278088	1	81.6034	0.308918	0.161137	0.839905	81.6034	-0.35751	0.139399	0.502012	81.6034	0.902563	4.63e-05	0.000931933	81.6034	0.888908	0.000651372
LOC105369250	13.7523	-0.293729	0.682004	1	13.7523	1.14576	0.142377	0.823458	13.7523	0.533496	0.451629	0.788713	13.7523	-1.40381	0.0470869	0.165308	13.7523	-2.71186	0.000652094
ATP5PB	1597.16	-0.0680855	0.543955	1	1597.16	-0.258919	0.0200116	0.53444	1597.16	0.0293842	0.796797	0.941524	1597.16	0.183633	0.100333	0.273903	1597.16	0.387553	0.000652116
UNC5B	408.958	-0.25099	0.0585886	1	408.958	-0.246277	0.0628479	0.710428	408.958	0.0816126	0.555137	0.850098	408.958	-0.526688	0.000106397	0.00178467	408.958	-0.500546	0.000652785
ALDH7A1	1835.52	0.166581	0.0739989	1	1835.52	-0.078803	0.391979	0.941267	1835.52	0.0467316	0.619905	0.876643	1835.52	-0.0917928	0.318178	0.559756	1835.52	-0.32124	0.000655213
SDK1	43.4531	-0.0715455	0.839783	1	43.4531	0.0627968	0.859258	0.993238	43.4531	-0.694226	0.0604922	0.355026	43.4531	-1.27324	0.000527104	0.00641266	43.4531	-1.61878	0.000655416
RPN1	967.175	-0.0980756	0.522972	1	967.175	-0.0356929	0.814619	0.99209	967.175	-0.0439081	0.776438	0.934662	967.175	0.148389	0.330982	0.572159	967.175	-0.521835	0.000658609
LL21NC02-21A1.1	9.26743	-1.01904	0.158584	1	9.26743	-0.715498	0.310611	0.924963	9.26743	1.12612	0.171579	0.548509	9.26743	-0.105777	0.888073	0.949168	9.26743	2.64934	0.000667208
LOX	30.6239	-0.508673	0.315216	1	30.6239	-0.522274	0.314759	0.926448	30.6239	-1.52201	0.00428977	0.114123	30.6239	0.120618	0.802652	0.909134	30.6239	-1.91063	0.000667764
SORCS1	14.5936	0.596362	0.261901	1	14.5936	-0.589962	0.25257	0.895355	14.5936	0.219979	0.700401	0.906428	14.5936	-0.170675	0.766366	0.890935	14.5936	-2.37623	0.000667997
LOC105373218	43.9358	0.0308391	0.945264	1	43.9358	0.780452	0.0816688	0.747109	43.9358	0.0111216	0.981028	0.995243	43.9358	0.865294	0.051473	0.175681	43.9358	1.85793	0.000669032
ZNF449	218.968	-0.104779	0.632449	1	218.968	0.0848625	0.690277	0.988767	218.968	-0.214221	0.33772	0.710021	218.968	-0.237531	0.256567	0.492364	218.968	-0.733624	0.000669399
ARHGAP19	590.088	0.0397359	0.756096	1	590.088	0.106408	0.389221	0.941267	590.088	-0.195884	0.133575	0.492177	590.088	0.106987	0.379646	0.617948	590.088	-0.421491	0.000670043
ACTB	6694.75	0.312409	0.153262	1	6694.75	0.0520077	0.812059	0.99209	6694.75	-0.072756	0.739802	0.921112	6694.75	0.154088	0.481477	0.703245	6694.75	0.746317	0.000675651
WWOX	66.3793	-0.317387	0.167746	1	66.3793	0.0857839	0.704388	0.991919	66.3793	-0.382224	0.129679	0.48863	66.3793	0.465356	0.0372556	0.1409	66.3793	0.854094	0.000676935
RAB11FIP1	576.774	-0.0813343	0.568785	1	576.774	-0.0432094	0.760323	0.99209	576.774	-0.132624	0.361664	0.726846	576.774	-0.156597	0.272957	0.511412	576.774	-0.496737	0.000681714
SLC39A13	137.795	0.0988737	0.58414	1	137.795	-0.0314716	0.860586	0.993238	137.795	0.143521	0.459904	0.794873	137.795	-0.573455	0.00159654	0.0146133	137.795	-0.647629	0.000682712
UTP23	144.618	0.508168	0.00589472	1	144.618	0.293047	0.0990624	0.760283	144.618	0.248482	0.183408	0.566066	144.618	0.786017	1.79e-05	0.00044328	144.618	0.701963	0.000684709
SUGT1	474.51	-0.0396541	0.704569	1	474.51	-0.200833	0.0475944	0.682386	474.51	-0.20364	0.065862	0.369126	474.51	-0.0629984	0.547844	0.752968	474.51	-0.376827	0.000685433
UBASH3B	228.885	0.191758	0.581728	1	228.885	-0.348383	0.307761	0.924963	228.885	-0.619539	0.0740388	0.38891	228.885	-0.650699	0.05558	0.185276	228.885	-1.17128	0.000686823
SMAD9	130.04	-0.226156	0.285722	1	130.04	-0.216203	0.302912	0.924963	130.04	-0.0758815	0.735404	0.920693	130.04	-1.04567	1.37e-06	5.45e-05	130.04	-0.782774	0.000686884
SETD3	1245.39	-0.135642	0.172004	1	1245.39	-0.0634368	0.519641	0.968306	1245.39	-0.17471	0.0879394	0.415833	1245.39	-0.296139	0.00278956	0.0221186	1245.39	-0.341948	0.000688161
BRPF1	301.443	0.08293	0.563488	1	301.443	-0.00463637	0.974065	0.9983	301.443	0.0964557	0.525506	0.834755	301.443	0.555038	0.00011463	0.00187937	301.443	0.520367	0.000691532
DENND5B	477.526	0.053475	0.724242	1	477.526	0.258439	0.0836317	0.749143	477.526	-0.147843	0.338707	0.710319	477.526	-0.331991	0.0290512	0.119411	477.526	-0.529792	0.000692002
RRS1	137.194	-0.153897	0.531345	1	137.194	0.517067	0.032553	0.597699	137.194	0.17019	0.502108	0.822772	137.194	1.02315	2.42e-05	0.000564478	137.194	0.884537	0.000696002
PHF19	513.3	-0.0674111	0.591693	1	513.3	-0.0586424	0.636579	0.986225	513.3	-0.053907	0.677208	0.898033	513.3	-0.336841	0.00863717	0.0511887	513.3	-0.451649	0.000698219
CCT6P1	47.1648	0.127246	0.694509	1	47.1648	0.513474	0.0949617	0.760283	47.1648	0.242464	0.469427	0.800288	47.1648	1.38323	6.16e-06	0.000191107	47.1648	1.11257	0.000698654
CHST7	40.999	-0.627729	0.0572425	1	40.999	-0.150445	0.642511	0.986263	40.999	0.128657	0.719526	0.913842	40.999	-0.0927383	0.772324	0.894566	40.999	-1.18763	0.000699727
KLHDC2	207.618	0.0307754	0.835289	1	207.618	-0.00743651	0.958443	0.996314	207.618	0.0232906	0.878958	0.970055	207.618	-0.549141	0.000156853	0.00241106	207.618	-0.517822	0.000701091
AMPD2	363.705	-0.319605	0.0239748	1	363.705	-0.242509	0.087317	0.754718	363.705	-0.0318616	0.829295	0.954088	363.705	-0.465758	0.00174636	0.0155629	363.705	-0.528737	0.000705513
NNT-AS1	174.765	0.0607671	0.739771	1	174.765	-0.0734455	0.679621	0.987729	174.765	0.0619708	0.739449	0.921112	174.765	-0.543544	0.00333656	0.0252959	174.765	-0.67856	0.000707102
SH3PXD2A	193.711	-0.0980954	0.509165	1	193.711	-0.116785	0.428604	0.948856	193.711	-0.219376	0.174629	0.553162	193.711	0.112257	0.484254	0.705537	193.711	0.567232	0.00070749
GPATCH1	145.233	0.0774433	0.653446	1	145.233	0.0140608	0.932642	0.99546	145.233	0.590519	0.00101757	0.0521493	145.233	0.105876	0.530386	0.740231	145.233	0.623509	0.00070965
MRPL49	1534.49	0.161186	0.116663	1	1534.49	0.10089	0.321676	0.930927	1534.49	0.152613	0.144868	0.509076	1534.49	0.290727	0.00468104	0.0322107	1534.49	0.353377	0.000711655
INTS7	161.195	0.00722858	0.96736	1	161.195	0.171318	0.323752	0.932253	161.195	0.344755	0.059438	0.352696	161.195	0.546693	0.00188037	0.016514	161.195	0.634563	0.000712229
ZFP1	112.776	0.0447776	0.827283	1	112.776	-0.0841631	0.666898	0.986951	112.776	0.454874	0.0348418	0.280131	112.776	0.305757	0.127258	0.320797	112.776	-0.710153	0.000713369
SEC23B	409.714	0.0562563	0.638684	1	409.714	0.0353649	0.762139	0.99209	409.714	-0.0248053	0.84195	0.957703	409.714	-0.115609	0.3271	0.569	409.714	-0.409786	0.000719181
UNC119B	816.151	0.0663063	0.45615	1	816.151	0.111546	0.200308	0.864244	816.151	0.259475	0.00476447	0.118867	816.151	0.0699061	0.420356	0.654825	816.151	0.30397	0.000719877
NDRG3	502.343	-0.174507	0.193195	1	502.343	-0.263508	0.0480971	0.682386	502.343	-0.145056	0.293934	0.675711	502.343	-0.36508	0.00755017	0.0464522	502.343	-0.491312	0.00072156
LOC101927550	24.2147	-0.011996	0.984367	1	24.2147	0.253449	0.677231	0.987729	24.2147	1.14011	0.0652749	0.367792	24.2147	1.67938	0.0123612	0.0655409	24.2147	2.67459	0.000722459
FADS2	79.2017	-0.189345	0.326481	1	79.2017	-0.0321797	0.862773	0.993238	79.2017	-0.275574	0.182935	0.565353	79.2017	-0.172945	0.396397	0.634358	79.2017	-0.798793	0.000725688
RLF	171.047	-0.0880327	0.606807	1	171.047	0.174185	0.287919	0.913805	171.047	0.223107	0.201564	0.586578	171.047	0.22248	0.158992	0.367291	171.047	0.546135	0.000726483
GET3	780.395	0.0421212	0.712595	1	780.395	0.10719	0.343902	0.938294	780.395	0.258168	0.0270613	0.250733	780.395	0.198104	0.0844465	0.244795	780.395	0.410124	0.000727339
ERGIC2	780.113	-0.0140796	0.9033	1	780.113	0.200243	0.0767381	0.738413	780.113	-0.131179	0.267039	0.652197	780.113	-0.185109	0.101508	0.275896	780.113	-0.390562	0.000728119
SGK3	154.077	0.10987	0.475459	1	154.077	-0.057816	0.696772	0.988849	154.077	-0.205639	0.216486	0.603861	154.077	-0.70301	1.37e-05	0.000358174	154.077	-0.583843	0.000728182
ATP5F1B	3546.47	-0.0559705	0.495344	1	3546.47	-0.0136949	0.866514	0.993238	3546.47	-0.187411	0.0238416	0.240325	3546.47	0.260653	0.00139273	0.01324	3546.47	0.280384	0.000729373
ZNF107	177.283	-0.26249	0.220576	1	177.283	-0.134006	0.524147	0.968306	177.283	0.0897225	0.683899	0.900913	177.283	0.674011	0.00155557	0.0143742	177.283	0.75905	0.000731687
WDR13	243.932	-0.0583837	0.641615	1	243.932	-0.0575417	0.642405	0.986263	243.932	0.0261657	0.841612	0.957626	243.932	-0.226689	0.0726581	0.222383	243.932	-0.464458	0.000732165
GPR83	5.87756	-0.123517	0.92047	1	5.87756	-0.435828	0.633379	NA	5.87756	4.96682	0.000794847	0.0457567	5.87756	2.4664	0.00712868	0.0444616	5.87756	3.55972	0.000733875
TMOD4	5.82954	0.9199	0.384071	1	5.82954	1.20374	0.218584	NA	5.82954	-0.182751	0.860292	0.963157	5.82954	0.971479	0.331027	0.572167	5.82954	4.61929	0.000735728
KMT2D	372.157	0.109531	0.423517	1	372.157	0.039922	0.771163	0.99209	372.157	0.0840206	0.558463	0.851928	372.157	-0.590733	3.31e-05	0.000719137	372.157	0.505677	0.000736411
HDX	64.9398	-0.131899	0.647482	1	64.9398	0.341965	0.230562	0.882374	64.9398	0.403815	0.191466	0.574976	64.9398	0.354422	0.245928	0.480954	64.9398	1.07187	0.000739089
CNOT2	689.271	-0.0863068	0.303025	1	689.271	-0.00593074	0.941522	0.99546	689.271	-0.132511	0.132964	0.491677	689.271	-0.0917957	0.260837	0.497022	689.271	-0.289393	0.00073919
MIR339	14.9235	0.570719	0.316097	1	14.9235	-0.112341	0.841396	0.992693	14.9235	1.53418	0.0125329	0.18002	14.9235	-0.843024	0.140982	0.341619	14.9235	2.22738	0.000739889
MYO9B	119.826	-0.0189485	0.921818	1	119.826	0.0505511	0.79326	0.99209	119.826	-0.140341	0.499518	0.82119	119.826	-0.201469	0.325537	0.5672	119.826	-0.747802	0.000740643
C8orf44-SGK3	158.805	0.0892803	0.560912	1	158.805	-0.0705905	0.633264	0.986217	158.805	-0.0940385	0.566786	0.855297	158.805	-0.644016	5.85e-05	0.00112408	158.805	-0.578813	0.000741268
SLC30A5	224.517	0.198843	0.311237	1	224.517	-0.190585	0.322188	0.930927	224.517	-0.00591031	0.976673	0.994001	224.517	-0.184116	0.346742	0.586968	224.517	-0.675998	0.000741687
UXT-AS1	3.45917	-1.78557	0.228125	1	3.45917	-0.613683	0.542003	NA	3.45917	-0.213179	0.855547	0.961743	3.45917	-0.546838	0.579923	NA	3.45917	-5.01072	0.000746027
KHNYN	365.014	-0.129541	0.352608	1	365.014	-0.179524	0.185474	0.85813	365.014	-0.0525058	0.717128	0.912156	365.014	-0.530813	0.000121847	0.0019776	365.014	-0.470237	0.000746875
HS6ST1	151.732	-0.221184	0.186687	1	151.732	-0.221367	0.174335	0.852228	151.732	0.231281	0.189283	0.572294	151.732	-0.768036	1.06e-05	0.000293581	151.732	-0.640692	0.000747885
FAM161A	478.402	0.202627	0.150953	1	478.402	0.109483	0.432066	0.951072	478.402	-0.334664	0.0218336	0.233693	478.402	-0.373249	0.00786407	0.0479368	478.402	-0.495422	0.000750123
CDC42EP1	3334.53	0.0433771	0.59333	1	3334.53	0.116286	0.151314	0.833686	3334.53	0.197599	0.0160207	0.196597	3334.53	-0.167962	0.0398328	0.147567	3334.53	-0.280369	0.000750301
TRIM14	455.436	0.147631	0.333743	1	455.436	-0.100747	0.506281	0.968306	455.436	0.0178992	0.908501	0.976129	455.436	0.047822	0.757973	0.88662	455.436	0.577136	0.000752553
KLHL24	211.359	-0.111655	0.539191	1	211.359	-0.239385	0.175863	0.852901	211.359	-0.053871	0.773484	0.934131	211.359	-0.337667	0.0521085	0.177101	211.359	-0.578082	0.000755377
CA12	288.412	-0.0855972	0.704987	1	288.412	0.0839798	0.708589	0.992056	288.412	0.0510298	0.823766	0.952518	288.412	-0.48768	0.0318754	0.126993	288.412	-0.804687	0.000755595
GPR160	152.406	-0.351365	0.0718079	1	152.406	-0.354958	0.0564093	0.69925	152.406	-0.312685	0.118724	0.470866	152.406	-0.477794	0.00872184	0.0515643	152.406	-0.631496	0.000760053
TRIP10	2026.88	-0.0390459	0.798093	1	2026.88	-0.115339	0.44903	0.957449	2026.88	-0.0308986	0.840515	0.957158	2026.88	-0.385351	0.0114419	0.0621329	2026.88	-0.512552	0.000761285
SMAGP	111.031	-0.126466	0.491039	1	111.031	-0.137614	0.437554	0.952368	111.031	-0.22919	0.237474	0.626231	111.031	-0.560044	0.00191228	0.0167035	111.031	-0.637213	0.00076375
SIL1	40.2948	0.525837	0.137226	1	40.2948	-0.0820707	0.809021	0.99209	40.2948	0.613796	0.0838058	0.40675	40.2948	0.0481625	0.888629	0.949464	40.2948	-1.2957	0.000765948
FADS3	26.518	0.0549944	0.881108	1	26.518	-0.239268	0.517078	0.968306	26.518	0.633349	0.118979	0.471308	26.518	-0.154505	0.694414	0.84866	26.518	-1.64138	0.000771247
RGMB	177.784	-0.0182678	0.929484	1	177.784	0.140205	0.487311	0.964518	177.784	0.224702	0.280807	0.66432	177.784	0.19982	0.323612	0.56508	177.784	0.712821	0.000771396
ASPRV1	20.7056	-0.349083	0.485879	1	20.7056	0.547431	0.272594	0.902233	20.7056	0.145024	0.804623	0.944653	20.7056	0.509077	0.290617	0.529941	20.7056	1.66116	0.000771547
SSR2	1368.8	0.000104898	0.998977	1	1368.8	-0.0396902	0.622964	0.986217	1368.8	0.203245	0.0160347	0.196597	1368.8	0.0245185	0.760799	0.888078	1368.8	-0.273015	0.000781513
CLOCK	384.709	-0.014818	0.933281	1	384.709	0.159999	0.359809	0.94012	384.709	-0.400966	0.0270273	0.250733	384.709	-0.706848	7.6e-05	0.00136775	384.709	-0.611003	0.00078448
HTR6	18.3693	0.338219	0.444632	1	18.3693	-0.228472	0.576414	0.981647	18.3693	-0.588836	0.197272	0.581919	18.3693	-0.701572	0.101709	0.276118	18.3693	-1.7234	0.000785734
SNRPD1	1197.33	-0.0674696	0.585606	1	1197.33	0.156361	0.202123	0.864368	1197.33	-0.0351904	0.777931	0.935244	1197.33	0.365958	0.00279571	0.0221431	1197.33	0.417958	0.000786036
MED26	82.9997	0.19229	0.39511	1	82.9997	0.101137	0.648845	0.986879	82.9997	-0.244972	0.321731	0.696859	82.9997	0.405139	0.063774	0.203315	82.9997	0.753143	0.000786879
ZNF394	285.346	0.0250805	0.875191	1	285.346	0.226966	0.148161	0.829184	285.346	0.288366	0.0833572	0.406155	285.346	0.447513	0.00473551	0.0324319	285.346	0.556676	0.000789744
PPIF	2464.15	0.0671705	0.362839	1	2464.15	-0.0234195	0.749538	0.99209	2464.15	0.0593043	0.43227	0.778054	2464.15	0.154714	0.0384954	0.14438	2464.15	0.261397	0.000789994
U2AF1L4	427.509	-0.0310562	0.823365	1	427.509	0.240123	0.083731	0.749143	427.509	0.171847	0.228524	0.617944	427.509	0.535914	0.000122227	0.00198154	427.509	0.492021	0.000795329
VWCE	25.1717	-0.769923	0.198736	1	25.1717	0.371737	0.522089	0.968306	25.1717	0.776186	0.194246	0.579271	25.1717	1.99181	0.000355982	0.00469663	25.1717	1.84864	0.000796252
RPP25	215.949	0.00748896	0.96966	1	215.949	-0.177734	0.359508	0.94012	215.949	0.0538216	0.788851	0.938665	215.949	0.0178442	0.929058	0.968558	215.949	0.725516	0.000797523
PLCB4	94.7655	-0.332407	0.148563	1	94.7655	-0.508495	0.0197399	0.532994	94.7655	-0.112272	0.63173	0.880649	94.7655	-0.376542	0.0836358	0.243308	94.7655	-0.784914	0.000799789
PAWR	715.979	-0.0294258	0.767705	1	715.979	0.193662	0.0466896	0.677233	715.979	-0.10579	0.300616	0.681427	715.979	-0.148991	0.13179	0.328198	715.979	-0.353848	0.000799906
TRPC4AP	298.545	0.0337541	0.810957	1	298.545	0.0206735	0.881062	0.993238	298.545	0.246553	0.0905959	0.420464	298.545	-0.289222	0.0423655	0.153441	298.545	-0.502475	0.000802787
STX16	480.621	0.0309851	0.79281	1	480.621	-0.0338327	0.769315	0.99209	480.621	-0.0683896	0.570694	0.857042	480.621	-0.160825	0.166433	0.378046	480.621	-0.401013	0.000804083
FIS1	394.902	0.0616718	0.740104	1	394.902	0.152873	0.407207	0.944969	394.902	0.410914	0.0282582	0.256402	394.902	0.256504	0.163762	0.374845	394.902	0.627202	0.000804231
IMMP1L	274.732	0.144376	0.333657	1	274.732	-0.177576	0.214047	0.874176	274.732	-0.0401634	0.795685	0.941484	274.732	0.439747	0.00218067	0.0185459	274.732	0.490646	0.000805141
EML4	547.876	0.0574851	0.479205	1	547.876	-0.0227257	0.770174	0.99209	547.876	-0.107036	0.214653	0.601277	547.876	-0.145519	0.0734594	0.223898	547.876	-0.304178	0.000810056
STX17-AS1	10.1174	0.727213	0.411555	1	10.1174	0.471339	0.517504	0.968306	10.1174	-1.48248	0.0826859	0.405422	10.1174	1.30038	0.0460268	0.162831	10.1174	2.34314	0.000812194
TRIM37	240.667	0.102931	0.475356	1	240.667	0.109518	0.435321	0.951635	240.667	-0.0456301	0.765428	0.931624	240.667	-0.46383	0.00111951	0.0111997	240.667	-0.50208	0.000812362
EBAG9	155.635	0.442819	0.0139783	1	155.635	0.0188925	0.911551	0.993238	155.635	-0.244389	0.193518	0.578027	155.635	0.767048	3.21e-06	0.000111564	155.635	0.585696	0.000813197
PAQR5	153.302	-0.00108092	0.996046	1	153.302	-0.200689	0.345042	0.938294	153.302	0.368398	0.0981777	0.436397	153.302	-0.295824	0.171249	0.384834	153.302	-0.772297	0.000816451
GPAA1	450.001	0.0361031	0.763231	1	450.001	-0.282001	0.0183701	0.532205	450.001	0.253605	0.0412438	0.300798	450.001	0.308765	0.013428	0.0693899	450.001	0.474605	0.000817454
MET	177.156	-0.0781496	0.630124	1	177.156	-0.128818	0.408156	0.944969	177.156	-0.182197	0.278755	0.662439	177.156	-0.091261	0.572703	0.770499	177.156	-0.577665	0.000820219
SECISBP2	201.126	0.0599582	0.779495	1	201.126	-0.154985	0.463179	0.961004	201.126	-0.0962934	0.657933	0.890525	201.126	0.184479	0.387253	0.626	201.126	-0.750166	0.000820434
TMEM170B	96.293	0.0920932	0.677416	1	96.293	-0.134213	0.527014	0.968306	96.293	-0.130798	0.571228	0.857173	96.293	-0.952507	1.89e-05	0.000463463	96.293	-0.762588	0.000820477
CENPC	125.359	0.0272568	0.872832	1	125.359	0.125529	0.435853	0.951635	125.359	-0.567292	0.00239475	0.0834566	125.359	-0.526583	0.001391	0.01324	125.359	-0.577313	0.0008217
PCDH9	720.912	0.0412909	0.775767	1	720.912	0.00806457	0.955163	0.996064	720.912	-0.114047	0.435541	0.779642	720.912	-0.202764	0.158589	0.366743	720.912	-0.485252	0.00082354
UFD1	400.975	-0.0473411	0.699064	1	400.975	-0.116852	0.332766	0.934913	400.975	0.234517	0.0639379	0.364024	400.975	0.51964	2.84e-05	0.000640324	400.975	0.454419	0.000828836
CTDSPL	320.38	0.0373142	0.81424	1	320.38	-0.282056	0.0727499	0.730636	320.38	-0.13258	0.421934	0.770711	320.38	-0.775989	2.41e-06	8.86e-05	320.38	-0.573091	0.000829348
PPAN	92.1876	0.278934	0.212339	1	92.1876	0.0780809	0.719923	0.99209	92.1876	0.412558	0.0722996	0.384361	92.1876	0.263483	0.263173	0.499654	92.1876	0.902592	0.000830704
RPRD1A	977.697	-0.0687654	0.451958	1	977.697	0.0838984	0.346	0.939536	977.697	-0.025546	0.78472	0.93688	977.697	0.0964807	0.278011	0.517509	977.697	0.303528	0.000830706
AP4B1	1723.61	0.0945486	0.440798	1	1723.61	-0.116679	0.337707	0.937005	1723.61	0.394235	0.00138724	0.0626797	1723.61	-0.0543312	0.657615	0.824936	1723.61	0.41892	0.000836997
HCG11	204.785	0.0204593	0.903904	1	204.785	-0.0448429	0.788721	0.99209	204.785	-0.425029	0.0156876	0.194681	204.785	0.146287	0.39162	0.629832	204.785	0.592893	0.000837858
CPT1A	218.501	0.147184	0.336968	1	218.501	-0.156464	0.298995	0.924963	218.501	-0.40371	0.0135145	0.183136	218.501	-0.249621	0.105984	0.28415	218.501	-0.560777	0.000838443
LOC642943	6.51464	-0.964338	0.443657	1	6.51464	-1.32695	0.317215	NA	6.51464	1.98297	0.153317	0.520265	6.51464	4.22214	0.00812099	0.0490094	6.51464	5.74179	0.000842756
DMTN	106.223	-0.0213457	0.931361	1	106.223	-0.0563982	0.820018	0.99209	106.223	0.264241	0.303432	0.683316	106.223	-0.524005	0.0417871	0.152402	106.223	-0.891349	0.000842981
LOC105373883	5.42718	-0.869309	0.297007	1	5.42718	-2.39157	0.0128892	NA	5.42718	0.582624	0.487541	0.812464	5.42718	2.62676	0.00146263	0.0136807	5.42718	4.59667	0.000845562
GFOD2	135.412	-0.104197	0.593463	1	135.412	-0.264921	0.169341	0.848334	135.412	0.332908	0.107617	0.450982	135.412	0.439492	0.0277152	0.115687	135.412	0.711554	0.000848585
ZNF326	565.671	0.00938139	0.934177	1	565.671	0.0592171	0.594146	0.982562	565.671	-0.195589	0.092919	0.426516	565.671	0.598824	1.35e-07	7.86e-06	565.671	0.410563	0.000849526
EML2	110.912	0.0669978	0.717229	1	110.912	-0.178622	0.316324	0.927396	110.912	-0.735131	0.000105094	0.0154101	110.912	-0.637256	0.000144644	0.00226411	110.912	-0.581869	0.000852872
C18orf65	8.66793	-0.20689	0.830543	1	8.66793	1.11778	0.223765	NA	8.66793	0.280744	0.782395	0.935804	8.66793	2.01216	0.0090593	0.0531471	8.66793	2.57719	0.000855598
PDAP1	905.769	0.0107519	0.876987	1	905.769	-0.0648795	0.334774	0.935646	905.769	-0.183421	0.013032	0.182462	905.769	0.117112	0.0885228	0.253027	905.769	0.249953	0.000860463
ATMIN	154.13	0.053498	0.752558	1	154.13	0.0567328	0.733362	0.99209	154.13	-0.328264	0.079194	0.398999	154.13	0.281008	0.0996152	0.272815	154.13	0.591569	0.000860543
XRCC6	1015.25	-0.115127	0.227366	1	1015.25	-0.0846574	0.365723	0.94012	1015.25	0.0981497	0.314311	0.689977	1015.25	0.233813	0.0132803	0.0687979	1015.25	0.326261	0.000860866
STXBP3	106.901	-0.11265	0.677011	1	106.901	-0.0931553	0.724503	0.99209	106.901	-0.551283	0.054518	0.339835	106.901	-0.620543	0.0210954	0.0956704	106.901	-0.929471	0.000861342
FMNL3	104.476	-0.378443	0.448438	1	104.476	-0.432611	0.384243	0.941267	104.476	-0.485881	0.337286	0.709614	104.476	-1.102	0.0309807	0.124661	104.476	-1.75448	0.000864739
LINC00938	378.565	-0.103725	0.630378	1	378.565	0.0440653	0.83349	0.992423	378.565	0.13219	0.542327	0.844121	378.565	0.572795	0.00522513	0.0349129	378.565	0.682342	0.000865142
MRPL46	144.312	0.19592	0.333769	1	144.312	0.330958	0.0910371	0.759573	144.312	0.732542	0.000445646	0.0336246	144.312	0.190611	0.334639	0.57574	144.312	0.687611	0.000865348
THADA	117.93	0.121439	0.482146	1	117.93	0.0581362	0.728035	0.99209	117.93	0.255243	0.156222	0.523875	117.93	0.273276	0.119841	0.30903	117.93	0.686402	0.000865912
CFAP58-DT	10.2591	0.166448	0.807444	1	10.2591	1.61567	0.0425585	0.64963	10.2591	-0.197911	0.807208	0.946401	10.2591	-0.749773	0.227468	0.458623	10.2591	2.17181	0.000866372
DYRK3-AS1	7.04821	-0.0547962	0.950041	1	7.04821	0.229934	0.779607	NA	7.04821	0.5996	0.486829	0.811973	7.04821	1.4104	0.112853	0.296706	7.04821	3.07192	0.000866459
ZNF420	76.2311	0.79538	0.0191893	1	76.2311	0.836423	0.0100134	0.467701	76.2311	0.435698	0.201025	0.585448	76.2311	0.725749	0.0221658	0.099071	76.2311	1.06524	0.000866754
PLEKHG1	53.3525	0.37563	0.237637	1	53.3525	-0.213695	0.47419	0.962416	53.3525	0.196436	0.539444	0.842379	53.3525	-0.792118	0.0111031	0.0609079	53.3525	-1.08824	0.000868831
COL23A1	23.3393	0.219236	0.602989	1	23.3393	-0.272693	0.483517	0.964518	23.3393	0.615365	0.119023	0.471308	23.3393	-1.61497	4.08e-05	0.000847361	23.3393	-1.29269	0.000871217
ZNF207	1053.48	0.02736	0.697383	1	1053.48	0.014343	0.835002	0.99256	1053.48	-0.109098	0.144143	0.508334	1053.48	0.218565	0.00198419	0.0172382	1053.48	0.248927	0.000873233
UFSP1	67.7279	0.437475	0.189137	1	67.7279	0.562613	0.0848106	0.752304	67.7279	1.24673	0.000379595	0.030935	67.7279	-0.0557875	0.867939	0.93982	67.7279	1.29991	0.000874688
ABT1	636.246	0.0779932	0.475261	1	636.246	0.290885	0.00636519	0.415429	636.246	0.297271	0.00804735	0.148199	636.246	0.502583	2.46e-06	8.98e-05	636.246	0.368656	0.00087556
RPP30	480.681	0.016138	0.912097	1	480.681	0.306009	0.0337236	0.602653	480.681	0.4771	0.0014043	0.0630838	480.681	0.556434	0.000101897	0.00173416	480.681	0.486494	0.00087781
TMEM97	2129.68	-0.00691206	0.942746	1	2129.68	-0.01997	0.834623	0.99256	2129.68	-0.0338497	0.728612	0.917894	2129.68	-0.0339241	0.723086	0.866057	2129.68	-0.323578	0.000881313
SYT17	35.0376	0.454014	0.31229	1	35.0376	-0.133042	0.75225	0.99209	35.0376	-1.1236	0.0169203	0.203083	35.0376	-1.031	0.0119801	0.0641004	35.0376	-1.45743	0.000881461
FBXO46	169.361	0.392697	0.0200104	1	169.361	0.304389	0.064068	0.712072	169.361	0.0704311	0.685057	0.901446	169.361	0.639757	0.000112189	0.00185188	169.361	0.573341	0.000882816
ZFAS1	1065.51	0.169854	0.224951	1	1065.51	0.229949	0.0937559	0.760283	1065.51	0.391782	0.00508995	0.121713	1065.51	0.424482	0.00163269	0.014795	1065.51	0.447362	0.0008837
GDI1	2450.34	-0.0968604	0.35574	1	2450.34	-0.169047	0.106314	0.773337	2450.34	-0.0366861	0.728737	0.917894	2450.34	-0.0522501	0.617801	0.80043	2450.34	-0.351934	0.000883893
GOLGA3	214.85	-0.00106776	0.995621	1	214.85	-0.0729279	0.705061	0.991919	214.85	-0.0910952	0.651595	0.88832	214.85	-0.200887	0.310736	0.551938	214.85	-0.666918	0.000888384
TTC1	632.748	-0.0906186	0.475891	1	632.748	0.00181463	0.988397	0.999254	632.748	0.204875	0.114894	0.463449	632.748	0.433361	0.000548926	0.00655504	632.748	0.42891	0.000890141
NUP35	183.539	0.0565351	0.689849	1	183.539	0.298011	0.0268935	0.574892	183.539	-0.0014296	0.99236	0.998528	183.539	0.209596	0.119185	0.307892	183.539	0.486515	0.00089309
AFDN	339.201	0.00820047	0.939998	1	339.201	0.0309327	0.770855	0.99209	339.201	-0.0814372	0.474096	0.803069	339.201	0.187779	0.0863933	0.248702	339.201	0.406691	0.000893166
RUNDC1	304.09	0.123826	0.393874	1	304.09	0.385342	0.00705845	0.428874	304.09	0.00363555	0.980718	0.995196	304.09	-0.0049605	0.972883	0.988121	304.09	0.511893	0.000901365
GRK5	42.7839	0.106118	0.677954	1	42.7839	-0.208711	0.409416	0.944969	42.7839	-0.42985	0.133556	0.492177	42.7839	-0.471827	0.0725181	0.222179	42.7839	-1.00458	0.000906648
KLHL5	186.461	0.0345278	0.854627	1	186.461	0.166833	0.364598	0.94012	186.461	-0.250304	0.196097	0.581249	186.461	-0.822775	2.44e-05	0.000566359	186.461	-0.685882	0.000911178
ACTR3	854.155	-0.0226511	0.81283	1	854.155	-0.0248804	0.790127	0.99209	854.155	-0.13381	0.175022	0.553726	854.155	-0.144785	0.122609	0.313229	854.155	-0.331299	0.00091284
ID4	253.214	0.0326988	0.821461	1	253.214	0.0316026	0.815011	0.99209	253.214	-0.0777872	0.59251	0.866682	253.214	-0.249529	0.0594938	0.194379	253.214	-0.46304	0.000914033
TUSC2	249.457	0.331842	0.0200329	1	249.457	0.182639	0.191508	0.863591	249.457	-0.409361	0.00825844	0.149764	249.457	0.188664	0.188543	0.40865	249.457	0.51714	0.000918144
ACO1	310.387	-0.0504066	0.75299	1	310.387	0.052978	0.735581	0.99209	310.387	-0.113347	0.491376	0.81527	310.387	-0.0673366	0.672531	0.834189	310.387	-0.559091	0.000918551
TUSC3	603.722	0.127239	0.217741	1	603.722	-0.169636	0.0877314	0.754718	603.722	-0.168374	0.121277	0.476134	603.722	0.0167591	0.86518	0.938708	603.722	-0.335022	0.000920397
HS3ST3A1	597.114	0.0347834	0.740612	1	597.114	0.168482	0.0987852	0.760283	597.114	-0.228283	0.0362763	0.283866	597.114	-0.358857	0.000571006	0.00677097	597.114	-0.357324	0.000921407
MPP2	814.135	0.126452	0.33622	1	814.135	0.057293	0.660197	0.986879	814.135	-0.13194	0.322689	0.697961	814.135	-0.319232	0.0155484	0.0767957	814.135	-0.450398	0.00092192
KIF4A	621.56	-0.217717	0.0083847	1	621.56	-0.154953	0.0524151	0.687896	621.56	0.0684062	0.434175	0.779152	621.56	0.110013	0.183887	0.40348	621.56	0.283827	0.000928587
SMOC1	132.71	0.111039	0.567055	1	132.71	-0.340604	0.0786722	0.739361	132.71	-0.200443	0.329825	0.702958	132.71	-0.745207	0.000213131	0.0030999	132.71	-0.721453	0.000932641
HOXC13-AS	24.4097	-0.701349	0.117171	1	24.4097	-0.192192	0.66746	0.986951	24.4097	-0.542989	0.280612	0.664072	24.4097	0.950002	0.0352911	0.135834	24.4097	1.735	0.000934707
DESI2	250.827	-0.157754	0.239774	1	250.827	-0.0263303	0.838915	0.992693	250.827	-0.0804588	0.573353	0.858231	250.827	-0.0347587	0.797572	0.906512	250.827	-0.46333	0.000938526
PITHD1	185.94	-0.123923	0.455329	1	185.94	0.115217	0.472297	0.961004	185.94	0.392459	0.0218435	0.233693	185.94	0.361001	0.0253299	0.108827	185.94	0.54856	0.000945023
LOC114483834	46.544	0.287476	0.411934	1	46.544	-0.30669	0.378631	0.941267	46.544	-0.190429	0.611707	0.872753	46.544	1.3015	6.6e-05	0.00121724	46.544	1.04812	0.000948438
ZNF678	211.403	0.319928	0.119632	1	211.403	0.14122	0.477091	0.962825	211.403	-0.00819715	0.968267	0.99214	211.403	-0.162622	0.410354	0.645597	211.403	-0.668726	0.000949117
CSNK1E	1285.91	-0.0533869	0.58206	1	1285.91	0.061277	0.523791	0.968306	1285.91	-0.0202487	0.83727	0.956133	1285.91	-0.015922	0.869242	0.940729	1285.91	-0.323478	0.00095368
KAT8	308.428	0.124382	0.401296	1	308.428	-0.191158	0.178378	0.853717	308.428	0.176721	0.229397	0.619551	308.428	-0.390955	0.00531766	0.0354332	308.428	-0.477813	0.000957828
TNFRSF12A	74.5737	0.454449	0.119867	1	74.5737	0.77077	0.00336642	0.336892	74.5737	0.515581	0.0576859	0.347414	74.5737	0.0755897	0.761031	0.888078	74.5737	-0.817416	0.000959859
YWHAQ	1913.66	0.0807213	0.178793	1	1913.66	-0.158863	0.00678264	0.428395	1913.66	-0.145345	0.0200145	0.223161	1913.66	0.0933937	0.114049	0.298822	1913.66	0.204821	0.000961736
LOC107987108	3.15584	-0.59408	0.668975	1	3.15584	-2.15487	0.108378	NA	3.15584	-4.13039	0.0156687	0.194676	3.15584	-0.999448	0.485284	NA	3.15584	5.60738	0.000962584
ZNF121	491.719	0.122553	0.237883	1	491.719	0.304499	0.00222239	0.278005	491.719	0.271108	0.0118391	0.175693	491.719	0.642538	1.69e-10	3.03e-08	491.719	0.349062	0.000963865
LINC01136	4.18387	2.3292	0.090497	1	4.18387	-1.52122	0.167907	NA	4.18387	0.0833695	0.94488	0.985498	4.18387	-0.00823248	0.992574	NA	4.18387	4.35527	0.000971375
SPATA2	235.978	-0.233102	0.0853586	1	235.978	-0.0473684	0.720182	0.99209	235.978	0.354604	0.0135587	0.183539	235.978	0.62631	3.37e-06	0.000116185	235.978	0.463745	0.000972267
MIR4469	7.733	-0.893867	0.298954	1	7.733	-0.129384	0.87244	NA	7.733	-0.952448	0.38042	0.739108	7.733	4.40397	8.05e-05	0.00143126	7.733	2.96078	0.000975578
RXYLT1	169.269	-0.0475248	0.817631	1	169.269	0.0879713	0.661707	0.986879	169.269	0.155618	0.470923	0.800752	169.269	0.165021	0.421702	0.655523	169.269	0.728907	0.000981922
ZBTB8A	227.95	0.000161703	0.999197	1	227.95	0.135209	0.39415	0.941267	227.95	-0.264817	0.11629	0.466475	227.95	-0.52776	0.00114583	0.0114194	227.95	-0.549694	0.000984517
FUZ	181.637	0.0269016	0.851645	1	181.637	-0.0594985	0.675623	0.987729	181.637	0.457752	0.00198954	0.0754231	181.637	0.049695	0.722231	0.865461	181.637	0.490416	0.000988631
CDADC1	247.419	0.144921	0.469282	1	247.419	0.179156	0.360103	0.94012	247.419	-0.202792	0.324076	0.699309	247.419	0.318512	0.101336	0.275708	247.419	0.648457	0.000988846
C18orf21	315.368	0.212431	0.0995712	1	315.368	0.358769	0.00333133	0.336892	315.368	-0.105677	0.426694	0.773423	315.368	0.262128	0.0281106	0.11697	315.368	0.404151	0.000990492
RAB2B	1131.86	0.0155082	0.909733	1	1131.86	0.219977	0.105544	0.772756	1131.86	0.0951361	0.491039	0.814886	1131.86	-0.0412343	0.761253	0.888078	1131.86	-0.449904	0.000993386
RRP7BP	81.1157	0.0733847	0.74145	1	81.1157	0.284517	0.208151	0.869815	81.1157	0.375988	0.110136	0.456597	81.1157	0.768686	0.000788323	0.00862287	81.1157	0.871929	0.000996428
LGR4	76.893	0.0254393	0.909319	1	76.893	-0.288509	0.176619	0.852901	76.893	-0.66422	0.00658635	0.1347	76.893	-0.57451	0.0104965	0.0584829	76.893	-0.758014	0.000996464
BST1	5.76709	2.1698	0.0241641	1	5.76709	1.55425	0.124628	NA	5.76709	0.520681	0.565921	0.854964	5.76709	-0.57392	0.527486	0.737821	5.76709	3.48153	0.000997233
NDUFAF4	596.473	0.104631	0.475811	1	596.473	0.199671	0.166775	0.845952	596.473	0.290447	0.0510946	0.330646	596.473	0.459386	0.00139727	0.0132572	596.473	0.481855	0.00100439
ST8SIA6	9.31436	-1.31726	0.166202	1	9.31436	1.3113	0.157615	0.838128	9.31436	-2.59079	0.00852861	0.152209	9.31436	-2.63278	0.00431844	0.0305268	9.31436	-3.88232	0.00100556
ABHD17B	556.356	0.232539	0.0354106	1	556.356	-0.119249	0.268494	0.899985	556.356	-0.169092	0.141415	0.504941	556.356	-0.0540847	0.616956	0.800236	556.356	0.373933	0.00100568
VDAC1	14321.5	-0.031755	0.817946	1	14321.5	-0.0359223	0.794424	0.99209	14321.5	-0.357844	0.009571	0.159921	14321.5	-0.0949776	0.490976	0.710455	14321.5	-0.454269	0.00100658
HOMER2	464.244	-0.0482594	0.652673	1	464.244	-0.220453	0.0340729	0.604102	464.244	0.135589	0.219834	0.607986	464.244	-0.101853	0.338427	0.5791	464.244	-0.377831	0.00100803
ALDOC	242.261	0.397412	0.216105	1	242.261	-0.460122	0.145655	0.825343	242.261	-0.256169	0.424728	0.77193	242.261	-0.482638	0.124422	0.316364	242.261	-1.0361	0.00100901
TM9SF4	196.091	0.0340779	0.830193	1	196.091	0.503622	0.00126189	0.205399	196.091	0.449594	0.00654749	0.134502	196.091	0.161168	0.280536	0.52029	196.091	-0.504412	0.0010091
MYO1B	191.387	0.0968665	0.531419	1	191.387	0.0325099	0.828234	0.992423	191.387	0.0332905	0.837123	0.956133	191.387	-0.318263	0.035212	0.135699	191.387	-0.539889	0.00100963
PHF23	451.937	0.0757091	0.548019	1	451.937	-0.125013	0.311012	0.924963	451.937	0.148821	0.259123	0.645545	451.937	0.303326	0.0171208	0.0821952	451.937	0.437111	0.00101249
ATP5MC3	4530.13	-0.10809	0.261665	1	4530.13	-0.0220547	0.818058	0.99209	4530.13	-0.108684	0.262319	0.648033	4530.13	0.203299	0.0343273	0.13365	4530.13	0.317961	0.00101721
CCDC34	539.915	-0.051667	0.676629	1	539.915	0.260859	0.033192	0.601161	539.915	0.259656	0.0396577	0.295069	539.915	0.381607	0.00171585	0.0153344	539.915	0.41395	0.00101943
NR2F2	926.647	-0.181017	0.0644311	1	926.647	-0.0666919	0.493509	0.964518	926.647	0.137095	0.173036	0.550978	926.647	0.270893	0.00589203	0.0381747	926.647	0.338184	0.00102022
GALNT18	58.5006	-0.00868143	0.969978	1	58.5006	-0.133845	0.539738	0.973942	58.5006	0.505255	0.0357797	0.282584	58.5006	-0.732213	0.0015864	0.0145297	58.5006	-0.890007	0.00102109
OGDH	75.4827	-0.0882494	0.691338	1	75.4827	-0.0532472	0.805029	0.99209	75.4827	0.312528	0.1821	0.563934	75.4827	-0.455201	0.0537483	0.181114	75.4827	-0.891099	0.00102173
ZCWPW1	22.7317	0.000250745	0.999521	1	22.7317	-0.236139	0.544909	0.974368	22.7317	-0.0867808	0.830659	0.954276	22.7317	0.435717	0.252563	0.487814	22.7317	1.32645	0.00102311
SLC23A2	132.984	0.109357	0.52036	1	132.984	0.238381	0.152635	0.833686	132.984	0.0373433	0.835461	0.955378	132.984	0.12619	0.473266	0.696988	132.984	0.655228	0.00102403
LOC399975	19.3381	0.482316	0.326879	1	19.3381	-0.519388	0.311179	0.924963	19.3381	0.953	0.0859209	0.411306	19.3381	4.65472	3.9e-11	8.21e-09	19.3381	1.7032	0.00102767
LOC107984751	36.1135	0.438229	0.312546	1	36.1135	-0.119507	0.779939	0.99209	36.1135	0.250791	0.567185	0.855541	36.1135	0.659505	0.126054	0.31891	36.1135	1.5243	0.00103091
LOC729291	39.4372	1.53718	0.00372403	1	39.4372	0.472292	0.356704	0.94012	39.4372	-1.42384	0.013508	0.183136	39.4372	0.294466	0.561146	0.762257	39.4372	1.76529	0.0010315
SLCO5A1	84.5948	-0.516069	0.0398879	1	84.5948	0.0326135	0.894654	0.993238	84.5948	0.235088	0.361306	0.72668	84.5948	0.119693	0.624026	0.804812	84.5948	-0.868754	0.00103264
MXI1	396.721	-0.00987246	0.940158	1	396.721	-0.146754	0.244297	0.890809	396.721	-0.175862	0.191455	0.574976	396.721	-0.261643	0.0389596	0.145147	396.721	-0.436382	0.00103544
PSMA2	334.722	0.127713	0.262708	1	334.722	0.215778	0.0453615	0.669223	334.722	-0.165963	0.16317	0.533609	334.722	0.291358	0.0062168	0.0398875	334.722	0.373324	0.00104398
GPR63	90.1763	0.223338	0.450856	1	90.1763	0.115069	0.689566	0.988703	90.1763	-0.531925	0.0814952	0.404009	90.1763	0.0166788	0.953781	0.978562	90.1763	-0.984626	0.0010456
TEF	35.9416	-0.021529	0.945854	1	35.9416	-0.340665	0.258759	0.898552	35.9416	0.805263	0.013791	0.184967	35.9416	-1.02592	0.00105668	0.0106889	35.9416	-1.03479	0.00104638
GOLPH3	570.774	0.17775	0.202131	1	570.774	0.0681825	0.618605	0.985653	570.774	0.0887381	0.52861	0.836167	570.774	0.287007	0.0357821	0.136885	570.774	-0.457454	0.00104958
DYNC1H1	732.625	-0.135402	0.143887	1	732.625	-0.307194	0.000871522	0.165835	732.625	-0.165179	0.087753	0.415247	732.625	-0.2056	0.0322004	0.127833	732.625	-0.349862	0.00105147
REC8	29.8318	-0.25346	0.582913	1	29.8318	0.00804022	0.98627	0.999254	29.8318	0.61499	0.225128	0.613996	29.8318	-0.089146	0.845899	0.92978	29.8318	1.46073	0.00105664
SRF	611.197	0.0512776	0.701466	1	611.197	-0.0761161	0.563971	0.978206	611.197	-0.172669	0.21142	0.598443	611.197	0.35129	0.00841826	0.0503208	611.197	0.450274	0.0010574
LOC105375038	3.7199	0.66218	0.643943	1	3.7199	3.5421	0.0207465	NA	3.7199	1.35916	0.448051	0.785946	3.7199	3.85368	0.00646807	NA	3.7199	3.94773	0.00105785
RBM26	1864.2	-0.0439502	0.656771	1	1864.2	-0.0613048	0.533825	0.969352	1864.2	0.141319	0.158434	0.526858	1864.2	0.118089	0.230779	0.462833	1864.2	0.328835	0.00105785
QTRT2	232.071	-0.0218055	0.908178	1	232.071	0.191253	0.301965	0.924963	232.071	-0.227512	0.242448	0.631692	232.071	0.502453	0.00784339	0.0478775	232.071	0.682945	0.00106097
TBC1D5	148.268	-0.516039	0.0283214	1	148.268	-0.104266	0.656297	0.986879	148.268	-0.0463103	0.848733	0.959192	148.268	-0.902909	0.0001391	0.00220345	148.268	-0.792542	0.00106279
FAR2	230.37	-0.0520763	0.728064	1	230.37	0.0582797	0.688081	0.988703	230.37	0.106066	0.494544	0.817821	230.37	-0.0208187	0.887273	0.949012	230.37	-0.536961	0.0010674
BOP1	427.219	0.0842267	0.63897	1	427.219	-0.121142	0.496767	0.964518	427.219	-0.0224703	0.901757	0.974282	427.219	0.378823	0.0356879	0.136739	427.219	0.638832	0.00106943
ZNF561-AS1	96.3203	0.0242898	0.932761	1	96.3203	0.0598418	0.833532	0.992423	96.3203	-0.377463	0.213509	0.600286	96.3203	-0.205963	0.473566	0.697175	96.3203	-0.978338	0.00107242
IARS1	1189.7	0.00754708	0.950892	1	1189.7	-0.0536892	0.656918	0.986879	1189.7	-0.181805	0.143025	0.507141	1189.7	0.12646	0.296058	0.535826	1189.7	-0.406144	0.00107515
VPS35	1433.06	-0.0416208	0.553446	1	1433.06	0.0681406	0.319655	0.930927	1433.06	-0.0282764	0.695296	0.904048	1433.06	0.0264016	0.703458	0.853884	1433.06	-0.235955	0.0010786
SLC25A5-AS1	29.7601	0.100463	0.831428	1	29.7601	0.18636	0.686525	0.988404	29.7601	0.414358	0.384938	0.742061	29.7601	0.199018	0.659101	0.825554	29.7601	1.62409	0.0010791
DHRS7	431.709	-0.166433	0.269108	1	431.709	-0.0861272	0.555833	0.976023	431.709	-0.144426	0.355393	0.722831	431.709	0.313386	0.0307052	0.124023	431.709	0.478471	0.00107982
SDE2	862.37	0.0501626	0.680334	1	862.37	0.240256	0.04376	0.656157	862.37	0.351578	0.00438117	0.114481	862.37	0.332204	0.00491411	0.0333562	862.37	0.391248	0.00108151
CLN6	69.4204	-0.109117	0.60227	1	69.4204	0.175321	0.401434	0.943195	69.4204	-0.0600355	0.796296	0.941524	69.4204	0.213608	0.331478	0.572554	69.4204	0.930232	0.00108346
ZDHHC17	226.005	0.0632022	0.700285	1	226.005	-0.0768689	0.629328	0.986217	226.005	-0.0625901	0.710795	0.910562	226.005	0.304363	0.0509454	0.174505	226.005	0.529543	0.00108758
PHIP	1213.66	-0.0263394	0.815559	1	1213.66	0.00889859	0.936322	0.99546	1213.66	-0.0332503	0.771181	0.933162	1213.66	-0.154417	0.167651	0.380159	1213.66	-0.37014	0.00108969
GSDMB	129.766	0.215681	0.363393	1	129.766	-0.154307	0.504341	0.968194	129.766	-0.00929888	0.969948	0.992946	129.766	-0.149554	0.515092	0.729973	129.766	-0.762752	0.00109238
NFAT5	231.765	0.0193258	0.899421	1	231.765	-0.196352	0.194581	0.86414	231.765	-0.403391	0.0156329	0.194676	231.765	0.375217	0.0140569	0.0715956	231.765	0.520722	0.00109358
NUP188	652.865	-0.00541584	0.966828	1	652.865	-0.13528	0.297431	0.923108	652.865	0.117605	0.377275	0.736526	652.865	0.0735883	0.576858	0.77344	652.865	0.46339	0.00109738
GRB10	1434.39	0.0643793	0.650538	1	1434.39	-0.350309	0.0132487	0.489542	1434.39	-0.335322	0.0193388	0.219465	1434.39	-0.486617	0.000665712	0.00759633	1434.39	-0.47845	0.00109943
FAM209A	2.79285	2.41024	0.157505	1	2.79285	-1.03118	0.543381	NA	2.79285	-3.17389	0.082597	NA	2.79285	5.85924	0.000969477	NA	2.79285	5.80068	0.00110005
COQ2	192.169	0.252585	0.0989465	1	192.169	0.122147	0.409354	0.944969	192.169	-0.0593105	0.715795	0.911977	192.169	-0.239544	0.110399	0.292371	192.169	-0.544126	0.00110596
KIF2C	283.685	-0.0840602	0.549887	1	283.685	-0.0567533	0.673547	0.987729	283.685	-0.0902849	0.544247	0.84491	283.685	-0.314696	0.0221791	0.0990999	283.685	-0.453345	0.00110788
ZNF518B	61.8278	0.221931	0.439843	1	61.8278	-0.0126912	0.963378	0.997668	61.8278	0.0184528	0.950556	0.986908	61.8278	0.468995	0.0933648	0.261818	61.8278	1.00318	0.00111068
ZMYND8	708.358	-0.0379167	0.768851	1	708.358	-0.105487	0.410039	0.944969	708.358	0.155567	0.234033	0.623106	708.358	0.240547	0.0614295	0.198515	708.358	0.433378	0.00111134
PCYOX1L	214.324	0.0655127	0.733963	1	214.324	0.0743919	0.693025	0.988849	214.324	0.250404	0.193073	0.577137	214.324	-0.821137	1.62e-05	0.000410798	214.324	-0.664966	0.00111461
CENPP	121.2	-0.0744259	0.709635	1	121.2	0.257382	0.190988	0.863591	121.2	0.328381	0.118449	0.470432	121.2	-0.228146	0.251727	0.487183	121.2	0.726581	0.00111825
CENPJ	215.825	-0.0184342	0.923703	1	215.825	0.0537999	0.777301	0.99209	215.825	-0.421137	0.0370034	0.287141	215.825	-0.481376	0.0119754	0.0641004	215.825	-0.641576	0.00112412
WDR5B	213.149	0.233011	0.233393	1	213.149	-0.171145	0.365423	0.94012	213.149	0.235578	0.231013	0.620465	213.149	0.609947	0.00103666	0.0105157	213.149	0.627492	0.00112878
FRAT2	476.094	-0.116834	0.319358	1	476.094	-0.0556776	0.628061	0.986217	476.094	-0.182351	0.133389	0.492161	476.094	0.193089	0.1007	0.274542	476.094	0.40374	0.00113126
ACO2	1483.68	-0.00167608	0.98162	1	1483.68	-0.112211	0.116779	0.794825	1483.68	-0.20572	0.00629195	0.132515	1483.68	-0.14728	0.0426127	0.153902	1483.68	-0.247272	0.00113803
DR1	1060.09	-0.00989298	0.943455	1	1060.09	0.16426	0.234222	0.88413	1060.09	0.110462	0.432464	0.778121	1060.09	0.609769	9.23e-06	0.000263981	1060.09	0.449466	0.00115083
XYLB	132.755	-0.358056	0.0618877	1	132.755	-0.0770668	0.68554	0.988014	132.755	-0.0810572	0.683183	0.900831	132.755	-0.146698	0.468683	0.694043	132.755	0.770328	0.00115191
PTPRF	441.774	0.162875	0.174955	1	441.774	-0.14232	0.233941	0.88413	441.774	0.0515241	0.67432	0.897132	441.774	-0.349084	0.00420699	0.0299548	441.774	-0.435989	0.00115386
ARL9	12.2831	0.12515	0.901815	1	12.2831	-0.299935	0.737436	0.99209	12.2831	0.783108	0.520661	0.832833	12.2831	2.91978	0.00102191	0.010417	12.2831	3.05024	0.00115691
RSRC2	1161.89	-0.017501	0.846775	1	1161.89	0.297896	0.00076966	0.16511	1161.89	-0.0910835	0.325584	0.700167	1161.89	0.457423	1.4e-07	8.09e-06	1161.89	0.28871	0.00115829
EIF2B4	284.681	-0.217036	0.210598	1	284.681	-0.0997776	0.558567	0.97752	284.681	0.184648	0.300028	0.680879	284.681	0.461867	0.007629	0.046838	284.681	0.590343	0.00115837
SPRYD3	99.94	0.280956	0.17301	1	99.94	-0.221108	0.271933	0.902233	99.94	0.591329	0.00663011	0.135149	99.94	-0.236055	0.262759	0.499259	99.94	-0.783159	0.00116764
LOC105376958	3.59223	-2.22668	0.0760808	1	3.59223	1.28607	0.248448	NA	3.59223	-1.0926	0.448065	0.785946	3.59223	1.22447	0.223061	NA	3.59223	4.84682	0.00116807
HOXB9	1803.2	-0.0382232	0.657773	1	1803.2	-0.0464281	0.58713	0.981647	1803.2	0.0607776	0.485917	0.811411	1803.2	-0.146539	0.0862258	0.248367	1803.2	0.281491	0.00117056
SUGP2	958.704	-0.145595	0.0326567	1	958.704	-0.112493	0.0942726	0.760283	958.704	0.00570735	0.936507	0.983879	958.704	-0.377271	4.56e-08	3.17e-06	958.704	-0.235802	0.00117556
TMX2	245.945	0.0524162	0.688898	1	245.945	0.137213	0.27853	0.907527	245.945	0.233795	0.0878941	0.415745	245.945	0.301371	0.0203466	0.0934328	245.945	0.45459	0.00117702
TUBE1	98.587	-0.225047	0.289595	1	98.587	0.215708	0.304798	0.924963	98.587	-0.247384	0.299362	0.680261	98.587	0.384869	0.0661889	0.208877	98.587	0.724549	0.00117723
TP53INP2	108.554	-0.0313594	0.92087	1	108.554	-0.117642	0.710461	0.99209	108.554	-0.312481	0.345785	0.716321	108.554	-0.19332	0.552153	0.756016	108.554	1.07561	0.00117781
NOP16	173.295	-0.0499284	0.734454	1	173.295	0.377208	0.00842065	0.453239	173.295	0.217845	0.167943	0.541451	173.295	0.376862	0.0119449	0.0640028	173.295	0.552506	0.00117933
BBS4	145.315	-0.00970282	0.959346	1	145.315	-0.0316294	0.862037	0.993238	145.315	-0.0511378	0.798076	0.942146	145.315	-0.51045	0.00510659	0.0343259	145.315	-0.61359	0.00118282
VPS45	895.162	0.0786848	0.583329	1	895.162	0.208917	0.141714	0.823458	895.162	-0.0363575	0.802755	0.944212	895.162	0.333348	0.0200112	0.0922804	895.162	0.47362	0.00118784
FGF2	82.1293	0.546849	0.015663	1	82.1293	-0.506778	0.0141082	0.494605	82.1293	0.326992	0.142673	0.506872	82.1293	-0.261237	0.201064	0.425202	82.1293	-0.711689	0.001188
CTNS	212.483	-0.194856	0.320706	1	212.483	-0.489519	0.0126645	0.486074	212.483	0.179928	0.379588	0.738415	212.483	0.0791408	0.70214	0.853283	212.483	0.741152	0.00118804
USP25	252.084	0.10624	0.547584	1	252.084	0.37085	0.0301463	0.586954	252.084	-0.375237	0.0368323	0.286529	252.084	-0.423714	0.0134207	0.0693769	252.084	-0.579788	0.00118949
LYPD6	32.8497	-0.420621	0.225478	1	32.8497	-0.479738	0.130954	0.811619	32.8497	-0.11504	0.750862	0.924627	32.8497	-1.82577	4.21e-06	0.000138302	32.8497	-1.24781	0.00118971
PCBP1-AS1	10.8822	-0.81373	0.388892	1	10.8822	-0.0207179	0.98406	0.999254	10.8822	0.495337	0.59703	0.867635	10.8822	0.230889	0.803151	0.909319	10.8822	3.46809	0.00118971
DIRC3	3.89551	-0.0344346	0.977687	1	3.89551	1.76192	0.186703	NA	3.89551	-1.80836	0.17589	0.554759	3.89551	0.759147	0.5812	NA	3.89551	5.38805	0.00119042
ATXN7L3	420.188	-0.0921605	0.514612	1	420.188	-0.0578598	0.680162	0.987729	420.188	0.0878706	0.549968	0.847848	420.188	0.214306	0.132941	0.329595	420.188	0.47953	0.00119214
UBE2S	23.4232	-0.308867	0.481565	1	23.4232	-0.859208	0.0404957	0.641207	23.4232	0.188674	0.657651	0.890519	23.4232	1.81384	1.26e-05	0.000333503	23.4232	1.35429	0.00119974
MAPK14	180.287	0.169889	0.286891	1	180.287	-0.215095	0.162743	0.839905	180.287	-0.122806	0.466942	0.79935	180.287	-0.0826712	0.596697	0.78694	180.287	-0.540887	0.00120031
TMEM101	204.06	0.237324	0.103206	1	204.06	0.176927	0.193969	0.864001	204.06	0.463427	0.00181189	0.0716594	204.06	-0.125642	0.352303	0.591556	204.06	-0.44571	0.00120248
KBTBD7	130.739	-0.11632	0.494215	1	130.739	-0.0357767	0.825576	0.992423	130.739	0.107822	0.541282	0.843339	130.739	-0.0904349	0.58604	0.780133	130.739	0.600686	0.00120288
SNORA68	6.58459	-1.55255	0.148051	1	6.58459	0.443488	0.600415	NA	6.58459	0.502728	0.655296	0.889154	6.58459	3.73581	6.62e-05	0.00121935	6.58459	2.55696	0.00120406
LRRC58	1943.23	0.123531	0.230415	1	1943.23	0.0486084	0.635193	0.986217	1943.23	-0.359598	0.000593908	0.0394214	1943.23	-0.323444	0.00179837	0.0159553	1943.23	-0.345128	0.00120482
GRWD1	208.578	0.312294	0.0821111	1	208.578	0.10141	0.569494	0.979131	208.578	0.409396	0.0265819	0.250733	208.578	0.619272	0.00072923	0.00811998	208.578	0.655313	0.0012054
ZSCAN32	137.175	0.249986	0.150027	1	137.175	0.383785	0.0213751	0.544542	137.175	0.158007	0.392705	0.746584	137.175	0.472043	0.00367835	0.0270163	137.175	0.562574	0.00120565
CENPS	108.317	0.0772846	0.722196	1	108.317	0.10349	0.627081	0.986217	108.317	-0.209255	0.359822	0.72595	108.317	0.553262	0.0106265	0.0589386	108.317	0.760685	0.00120737
[truncated: 20,529 more rows]

## Sheet: Supplementary File 2b
Supplementary File 2b: GO described in Figure 5. 3'RNA seq
pathway	Nsp14vsCtrl_6hr_padj	Nsp14vsCtrl_6hr_padj.1	Nsp14vsCtrl_6hr_ES	Nsp14vsCtrl_6hr_NES	Nsp14vsCtrl_6hr_nMoreExtreme	Nsp14vsCtrl_8hr_pval	Nsp14vsCtrl_8hr_padj	Nsp14vsCtrl_8hr_ES	Nsp14vsCtrl_8hr_NES	Nsp14vsCtrl_8hr_nMoreExtreme	Nsp14vsCtrl_12hr_pval	Nsp14vsCtrl_12hr_padj	Nsp14vsCtrl_12hr_ES	Nsp14vsCtrl_12hr_NES	Nsp14vsCtrl_12hr_nMoreExtreme	Nsp14vsCtrl_24hr_pval	Nsp14vsCtrl_24hr_padj	Nsp14vsCtrl_24hr_ES	Nsp14vsCtrl_24hr_NES	Nsp14vsCtrl_48hr_nMoreExtreme	Nsp14vsCtrl_48hr_pval	Nsp14vsCtrl_48hr_padj	Nsp14vsCtrl_48hr_ES	Nsp14vsCtrl_48hr_NES	Nsp14vsCtrl_48hr_nMoreExtreme
AIZARANI_LIVER_C10_MVECS_1	0.446813	0.792977	0.708691	1.46968	2263	0.239799	0.570253	-0.372069	-1.08774	857	0.00451778	0.0675954	-0.401859	-1.42432	22	0.000221239	0.00952726	-0.54533	-1.76871	0	0.00021815	0.00858641	-0.54533	-1.76599	0
AIZARANI_LIVER_C13_LSECS_2	0.458062	0.79655	0.700789	1.4313	2320	0.0111919	0.154679	-0.474226	-1.38372	39	0.000983671	0.025881	-0.426112	-1.50928	4	0.000221337	0.00952726	-0.634245	-2.05582	0	0.000218245	0.00858641	-0.634245	-2.05247	0
AIZARANI_LIVER_C9_LSECS_1	0.4568	0.796116	0.893806	1.71693	2320	0.0685199	0.340186	0.583159	1.5013	455	0.00157604	0.0341047	-0.407092	-1.47186	7	0.000452796	0.0122688	-0.481802	-1.59074	1	0.000220848	0.00858641	-0.481802	-1.59137	0
ALKBH3_TARGET_GENES	0.0109459	0.353336	-0.999961	-1.60259	52	0.01828	0.193048	0.606066	1.61393	131	0.00161518	0.0347334	0.381878	1.4367	7	0.000174307	0.00952726	0.522819	1.76834	0	0.000175101	0.00858641	0.522819	1.77249	0
ATF2_S_UP.V1_DN	0.251095	0.737794	-0.998925	-2.72519	1260	0.0184723	0.194294	-0.527146	-1.42719	73	0.0872954	0.352034	-0.376078	-1.24824	447	0.000213538	0.00952726	-0.616505	-1.86768	0	0.000212585	0.00858641	-0.616505	-1.86233	0
BANDRES_RESPONSE_TO_CARMUSTIN_WITHOUT_MGMT_48HR_DN	0.0551463	0.637577	-0.999083	-4.54318	276	0.097936	0.393673	-0.632066	-1.35506	464	0.507641	0.778939	0.371108	0.952253	2457	0.000411946	0.0122688	-0.814803	-1.92488	1	0.000202061	0.00858641	-0.814803	-1.93936	0
BASAKI_YBX1_TARGETS_DN	0.989723	0.995462	0.0242522	0.0407097	5103	0.275304	0.603788	-0.33959	-1.05157	815	0.000194363	0.00934237	-0.502871	-1.88245	0	0.000460511	0.0122715	-0.454084	-1.55811	1	0.000227118	0.00858641	-0.454084	-1.55982	0
BEGUM_TARGETS_OF_PAX3_FOXO1_FUSION_DN	0.169468	0.735087	0.189047	0.877182	856	0.113975	0.421974	0.620159	1.33527	618	0.883892	0.960961	-0.265796	-0.743006	4559	0.00103541	0.0199412	-0.713039	-1.82551	4	0.000204583	0.00858641	-0.713039	-1.83087	0
BERENJENO_TRANSFORMED_BY_RHOA_DN	0.422697	0.783711	-0.998877	-1.65322	2055	0.00271278	0.0868022	-0.450845	-1.40236	7	0.0171091	0.153587	-0.34284	-1.28735	86	0.000231965	0.00952726	-0.456928	-1.57274	0	0.000231321	0.00858641	-0.456928	-1.57126	0
BLANCO_MELO_COVID19_SARS_COV_2_INFECTION_A594_ACE2_EXPRESSING_CELLS_RUXOLITINIB_UP	0.471785	0.800654	0.997419	1.51368	2457	0.000140627	0.0373117	0.817511	2.16418	0	0.000201939	0.00934237	0.520365	1.9544	0	0.000174672	0.00952726	0.666967	2.24634	0	0.0001755	0.00858641	0.666967	2.25365	0
BLANCO_MELO_COVID19_SARS_COV_2_INFECTION_A594_ACE2_EXPRESSING_CELLS_UP	0.47846	0.803466	0.995842	1.44841	2509	0.000138966	0.0373117	0.818532	2.17646	0	0.000202922	0.00934237	0.487082	1.84303	0	0.00017298	0.00952726	0.641074	2.17457	0	0.000174155	0.00858641	0.641074	2.17914	0
BLANCO_MELO_COVID19_SARS_COV_2_LOW_MOI_INFECTION_A594_ACE2_EXPRESSING_CELLS_UP	0.172594	0.736985	0.999232	2.75394	858	0.000165317	0.0373117	0.910004	2.20697	0	0.000204918	0.00934237	0.589508	1.95133	0	0.000187161	0.00952726	0.729092	2.17129	0	0.000187793	0.00858641	0.729092	2.17082	0
BLANCO_MELO_MERS_COV_INFECTION_MCR5_CELLS_UP	0.327048	0.745422	0.998921	1.97442	1664	0.000156937	0.0373117	0.854121	2.15104	0	0.000407249	0.0152845	0.46242	1.62768	1	0.00018352	0.00952726	0.655164	2.05483	0	0.000185977	0.00858641	0.655164	2.0561	0
BONOME_OVARIAN_CANCER_SURVIVAL_SUBOPTIMAL_DEBULKING	0.237129	0.737303	-0.999339	-1.4954	1132	0.0634744	0.329373	-0.372208	-1.17258	170	0.00533702	0.0749839	-0.348653	-1.32903	26	0.000472701	0.0124294	-0.441732	-1.54355	1	0.000234742	0.00858641	-0.441732	-1.54532	0
BOQUEST_STEM_CELL_UP	0.809637	0.926113	0.0478552	0.103541	4082	0.00213732	0.0816125	-0.53955	-1.53654	7	0.000195618	0.00934237	-0.494073	-1.72064	0	0.000218531	0.00952726	-0.627478	-2.00045	0	0.000215796	0.00858641	-0.627478	-1.99184	0
BOYAULT_LIVER_CANCER_SUBCLASS_G3_UP	0.504915	0.812471	-0.0774499	-0.193945	2516	0.451276	0.740842	0.378948	0.959153	2898	0.140548	0.448011	0.336352	1.16991	686	0.00018315	0.00952726	0.55025	1.72916	0	0.000185288	0.00858641	0.55025	1.73041	0
BROWNE_HCMV_INFECTION_18HR_DN	0.281219	0.738406	0.998772	2.69504	1402	0.91293	0.960401	0.301009	0.735221	5577	0.214523	0.540636	-0.335546	-1.1242	1098	0.000213904	0.00952726	-0.603346	-1.85473	0	0.000214087	0.00858641	-0.603346	-1.84832	0
BROWNE_HCMV_INFECTION_48HR_DN	0.474746	0.802163	0.987716	1.5511	2471	0.152121	0.475498	0.462543	1.21856	1071	0.0359387	0.224942	-0.328319	-1.23227	182	0.000231107	0.00952726	-0.481137	-1.65198	0	0.000229516	0.00858641	-0.481137	-1.65216	0
CASP8AP2_TARGET_GENES	0.280079	0.738406	0.999112	1.84121	1426	0.0716783	0.346059	0.569938	1.48694	491	0.259342	0.590315	0.293736	1.07238	1276	0.000177274	0.00952726	0.506781	1.66424	0	0.000181719	0.00858641	0.506781	1.66934	0
CHARAFE_BREAST_CANCER_LUMINAL_VS_BASAL_UP	0.414479	0.779891	-0.998878	-1.6889	2020	0.000334784	0.0373117	-0.537608	-1.65314	0	0.62224	0.845919	-0.254419	-0.949045	3183	0.000462428	0.0122877	-0.461381	-1.57545	1	0.000228781	0.00858641	-0.461381	-1.57416	0
CHEN_HOXA5_TARGETS_9HR_UP	0.186809	0.737303	0.999308	2.26111	945	0.000152929	0.0373117	0.869176	2.21969	0	0.0198944	0.166888	0.3845	1.36316	97	0.00018093	0.00952726	0.627272	2.00055	0	0.000183959	0.00858641	0.627272	2.00381	0
CHICAS_RB1_TARGETS_CONFLUENT	0.389509	0.766347	-0.998987	-1.41993	1848	0.000385505	0.0401621	-0.5285	-1.67247	0	0.00196348	0.0386917	-0.360207	-1.38163	9	0.00023753	0.00952726	-0.471437	-1.65708	0	0.000234797	0.00858641	-0.471437	-1.65996	0
CHYLA_CBFA2T3_TARGETS_UP	0.618585	0.857176	0.065954	0.115913	3181	0.951487	0.977084	0.286214	0.738155	6334	0.00118041	0.0290207	-0.403617	-1.46861	5	0.000227015	0.00952726	-0.549992	-1.82587	0	0.000220216	0.00858641	-0.549992	-1.82837	0
CONCANNON_APOPTOSIS_BY_EPOXOMICIN_UP	0.309623	0.743062	0.998884	2.20084	1566	0.000154154	0.0373117	0.833502	2.12032	0	0.0119072	0.123388	0.398753	1.40707	57	0.000362384	0.0122688	0.530053	1.68778	1	0.000184196	0.00858641	0.530053	1.68858	0
CREIGHTON_ENDOCRINE_THERAPY_RESISTANCE_5	0.219799	0.737303	-0.999378	-1.49874	1047	0.176886	0.50374	-0.345148	-1.0885	475	0.000789422	0.0230783	-0.377351	-1.43879	3	0.000236183	0.00952726	-0.494048	-1.72551	0	0.000235128	0.00858641	-0.494048	-1.72686	0
CSR_LATE_UP.V1_DN	0.56597	0.834813	-0.0762924	-0.226797	2843	0.88338	0.948483	-0.29838	-0.816224	3491	0.0256759	0.190636	-0.417205	-1.38101	131	0.000213538	0.00952726	-0.620874	-1.88669	0	0.000213174	0.00858641	-0.620874	-1.88061	0
CUI_DEVELOPING_HEART_C6_EPICARDIAL_CELL	0.183417	0.737303	-0.99927	-2.57927	917	0.00101394	0.0603187	-0.617193	-1.68964	3	0.00761273	0.0938994	-0.44558	-1.49285	38	0.000213812	0.00952726	-0.60362	-1.8534	0	0.00021427	0.00858641	-0.60362	-1.84784	0
DAZARD_RESPONSE_TO_UV_NHEK_UP	0.263618	0.738406	0.999	2.38732	1325	0.000158932	0.0373117	0.878935	2.19327	0	0.000203004	0.00934237	0.569783	1.96379	0	0.000184468	0.00952726	0.599906	1.85305	0	0.000186081	0.00858641	0.599906	1.8581	0
DEBIASI_APOPTOSIS_BY_REOVIRUS_INFECTION_DN	0.568639	0.835981	-0.0683203	-0.137047	2795	0.00030931	0.0373117	-0.579179	-1.74798	0	0.0290196	0.203029	-0.352543	-1.28357	147	0.000226142	0.00952726	-0.541607	-1.80758	0	0.000220751	0.00858641	-0.541607	-1.81017	0
DEBIASI_APOPTOSIS_BY_REOVIRUS_INFECTION_UP	0.41606	0.78075	0.992503	1.90652	2113	0.000147558	0.0373117	0.856935	2.22716	0	0.000610128	0.0193604	0.433162	1.57169	2	0.000178731	0.00952726	0.63752	2.07963	0	0.000182349	0.00858641	0.63752	2.08675	0
DELYS_THYROID_CANCER_DN	0.000197589	0.0122824	1	2.28061	0	0.0592854	0.320594	0.618619	1.53647	369	0.00098174	0.025881	-0.450104	-1.54812	4	0.000217675	0.00952726	-0.622294	-1.96112	0	0.000214362	0.00858641	-0.622294	-1.95646	0
DELYS_THYROID_CANCER_UP	0.62699	0.860549	0.543409	0.875915	3228	0.460692	0.748432	-0.325722	-0.988949	1464	0.129977	0.431323	-0.308255	-1.13883	665	0.000456725	0.0122688	-0.476774	-1.61073	1	0.000223514	0.00858641	-0.476774	-1.61108	0
DLX6_TARGET_GENES	0.200305	0.737303	0.999377	1.41455	1051	0.0041196	0.100905	0.624053	1.68717	30	0.00462963	0.068946	0.345221	1.32461	22	0.000170097	0.00952726	0.448257	1.54233	0	0.0001731	0.00858641	0.448257	1.54242	0
DOUGLAS_BMI1_TARGETS_DN	0.0934927	0.673456	0.999653	1.86515	476	0.128351	0.443133	0.488331	1.27403	880	0.431948	0.727836	0.273783	1.00003	2119	0.000457666	0.0122688	-0.482603	-1.62642	1	0.000223115	0.00858641	-0.482603	-1.62809	0
DURAND_STROMA_S_UP	0.487699	0.805203	0.653082	1.28201	2477	0.00229753	0.0835169	-0.49842	-1.475	7	0.0669555	0.306212	-0.337	-1.21807	339	0.000224972	0.00952726	-0.612865	-2.01843	0	0.000219346	0.00858641	-0.612865	-2.01718	0
ELVIDGE_HIF1A_AND_HIF2A_TARGETS_DN	0.278577	0.738406	0.123717	0.438278	1393	0.0277507	0.235243	-0.521056	-1.3935	113	0.00272533	0.0487179	-0.497407	-1.60288	13	0.000210793	0.00952726	-0.646456	-1.91732	0	0.000209776	0.00858641	-0.646456	-1.90937	0
ELVIDGE_HIF1A_TARGETS_DN	0.468263	0.79961	0.0968101	0.369055	2345	0.0304038	0.242043	-0.536545	-1.40599	127	0.00175473	0.0362039	-0.525107	-1.65769	8	0.000207857	0.00952726	-0.736635	-2.13997	0	0.000207727	0.00858641	-0.736635	-2.13578	0
ELVIDGE_HYPOXIA_BY_DMOG_UP	0.00685622	0.319266	0.999962	3.06679	33	0.00229133	0.0834414	0.817652	1.99713	13	0.0203006	0.168749	-0.421586	-1.40023	103	0.000213038	0.00952726	-0.611923	-1.87548	0	0.000214179	0.00858641	-0.611923	-1.86794	0
ELVIDGE_HYPOXIA_DN	0.00797289	0.32068	-0.999962	-2.88476	39	0.299339	0.624272	-0.376307	-1.06302	1132	0.00326864	0.0556777	0.464771	1.56582	15	0.000184775	0.00952726	0.614424	1.86583	0	0.000188501	0.00858641	0.614424	1.86503	0
ENK_UV_RESPONSE_KERATINOCYTE_UP	0.381745	0.764052	0.998912	1.46951	1994	0.000137325	0.0373117	0.712825	1.90335	0	0.000201654	0.00934237	0.499461	1.88852	0	0.00034626	0.0122688	0.450759	1.52839	1	0.000174368	0.00858641	0.450759	1.5317	0
ERBB2_UP.V1_UP	0.097483	0.677521	0.999577	2.51851	487	0.747606	0.889287	-0.312612	-0.886932	2810	0.0170121	0.153452	-0.40384	-1.3823	86	0.000217533	0.00952726	-0.606704	-1.91089	0	0.000214041	0.00858641	-0.606704	-1.90709	0
ESC_V6.5_UP_LATE.V1_UP	0.343682	0.751233	-0.12818	-0.34165	1726	0.00736455	0.127665	-0.521327	-1.4688	27	0.212353	0.538022	-0.327741	-1.1195	1082	0.00021796	0.00952726	-0.590047	-1.85392	0	0.000214592	0.00858641	-0.590047	-1.84728	0
FAN_EMBRYONIC_CTX_BIG_GROUPS_BRAIN_ENDOTHELIAL	0.460416	0.797394	0.972051	1.70186	2366	0.0594427	0.320594	-0.403393	-1.2179	191	0.00572783	0.078183	-0.377578	-1.38192	28	0.000458716	0.0122688	-0.47069	-1.57823	1	0.000221141	0.00858641	-0.47069	-1.58076	0
FAN_EMBRYONIC_CTX_BIG_GROUPS_CAJAL_RETZIUS	0.413098	0.779281	-0.998913	-1.52044	1986	0.0108165	0.152329	-0.417199	-1.29877	30	0.08279	0.342641	-0.307737	-1.16297	418	0.000233645	0.00952726	-0.453826	-1.56799	0	0.000230681	0.00858641	-0.453826	-1.56708	0
FAN_EMBRYONIC_CTX_BRAIN_ENDOTHELIAL_1	0.583961	0.842321	0.801675	1.26982	3021	0.018556	0.194824	-0.415053	-1.28236	54	0.00214175	0.041349	-0.375989	-1.40875	10	0.000229305	0.00952726	-0.508974	-1.74609	0	0.000228206	0.00858641	-0.508974	-1.74556	0
FAN_EMBRYONIC_CTX_BRAIN_ENDOTHELIAL_2	0.423077	0.783711	0.984191	1.87359	2144	0.000298686	0.0373117	-0.545789	-1.62873	0	0.000197083	0.00934237	-0.47228	-1.71003	0	0.000226963	0.00952726	-0.568114	-1.87987	0	0.000221484	0.00858641	-0.568114	-1.88219	0
FARDIN_HYPOXIA_11	0.474068	0.801885	0.152736	0.709489	2339	0.0103226	0.149448	-0.723745	-1.60819	47	0.0325455	0.214038	-0.570823	-1.49591	167	0.0010248	0.0197741	-0.770307	-1.86547	4	0.000203874	0.00858641	-0.770307	-1.86981	0
FARMER_BREAST_CANCER_APOCRINE_VS_LUMINAL	0.449432	0.793399	0.948425	1.76957	2292	0.0113636	0.155814	-0.445986	-1.34617	36	0.000196618	0.00934237	-0.449994	-1.64489	0	0.000451977	0.0122688	-0.502867	-1.68027	1	0.000220361	0.00858641	-0.502867	-1.68322	0
FOXR2_TARGET_GENES	0.759848	0.907882	-0.0526399	-0.127212	3799	0.0679642	0.339057	0.586957	1.49021	439	0.00040783	0.0152845	0.474142	1.65947	1	0.000182349	0.00952726	0.601956	1.90158	0	0.000184502	0.00858641	0.601956	1.90494	0
GAO_LARGE_INTESTINE_ADULT_CJ_IMMUNE_CELLS	0.179188	0.737303	-0.999495	-1.5194	860	0.000332557	0.0373117	-0.572401	-1.75875	0	0.000196812	0.00934237	-0.406722	-1.52824	0	0.000229832	0.00952726	-0.623168	-2.13489	0	0.000227998	0.00858641	-0.623168	-2.13562	0
GARCIA_TARGETS_OF_FLI1_AND_DAX1_DN	0.515572	0.816637	0.0770706	0.212411	2565	0.0359493	0.258633	0.691848	1.71878	223	0.000204123	0.00934237	0.522858	1.77404	0	0.000184638	0.00952726	0.659417	2.01579	0	0.000187301	0.00858641	0.659417	2.0171	0
GARCIA_TARGETS_OF_FLI1_AND_DAX1_UP	0.292634	0.739513	-0.149371	-0.676903	1449	0.171871	0.498186	-0.510336	-1.21601	764	0.609375	0.838482	-0.316723	-0.910399	3119	0.000411692	0.0122688	-0.703256	-1.85812	1	0.000204708	0.00858641	-0.703256	-1.86443	0
GARY_CD5_TARGETS_DN	0.55656	0.831289	0.873957	1.37156	2892	0.0588799	0.319555	0.550863	1.47451	429	0.104595	0.386776	0.304278	1.14955	518	0.000172861	0.00952726	0.653898	2.22005	0	0.000173581	0.00858641	0.653898	2.22474	0
GARY_CD5_TARGETS_UP	0.65634	0.871589	0.634366	0.965276	3410	0.169742	0.496192	0.443031	1.18686	1241	0.101581	0.381364	-0.301043	-1.14477	513	0.000236351	0.00952726	-0.502407	-1.7528	0	0.000235073	0.00858641	-0.502407	-1.75445	0
GCM_ACTG1	0.208466	0.737303	0.998812	3.27268	1043	0.127277	0.441009	-0.434117	-1.20079	495	0.251891	0.580534	-0.331655	-1.10119	1298	0.000188147	0.00952726	0.67553	2.01522	0	0.000187336	0.00858641	0.67553	2.01604	0
GCM_APEX1	0.381228	0.763835	-0.102918	-0.350342	1912	0.127503	0.441488	-0.439109	-1.20401	502	0.207488	0.532836	-0.34593	-1.13748	1063	0.000188005	0.00952726	0.610897	1.80548	0	0.00018875	0.00858641	0.610897	1.80561	0
GCM_CSNK2B	0.563669	0.83377	-0.0868944	-0.319197	2832	0.111765	0.418137	-0.462136	-1.23947	455	0.779054	0.919434	-0.264412	-0.852059	4001	0.000189286	0.00952726	0.626998	1.81806	0	0.000190985	0.00858641	0.626998	1.82197	0
GCM_DDX5	0.293627	0.739513	-0.136415	-0.590303	1478	0.637818	0.84168	0.376989	0.863767	3588	0.00568516	0.0779786	-0.531871	-1.60127	28	0.000386698	0.0122688	0.725582	1.97229	1	0.000192753	0.00858641	0.725582	1.9788	0
GCM_NPM1	0.308015	0.743062	0.114999	0.391534	1540	0.13891	0.457594	-0.434184	-1.1905	547	0.412637	0.712705	-0.308469	-1.0143	2115	0.000188005	0.00952726	0.642874	1.89998	0	0.00018875	0.00858641	0.642874	1.90013	0
GNF2_APEX1	0.552083	0.829713	-0.0893967	-0.333983	2755	0.311859	0.634836	0.446528	1.06298	1824	0.24961	0.578253	-0.350805	-1.1159	1280	0.000190367	0.00952726	0.717208	2.05867	0	0.00019253	0.00858641	0.717208	2.05841	0
GNF2_DAP3	0.297945	0.739513	0.11734	0.386581	1492	0.612275	0.83059	0.360335	0.880127	3740	0.947021	0.983526	-0.230907	-0.765797	4879	0.000187582	0.00952726	0.706161	2.1053	0	0.000187512	0.00858641	0.706161	2.10458	0
GNF2_DENR	0.343546	0.751233	0.138619	0.6261	1737	0.788053	0.906456	0.346415	0.774477	4379	0.039292	0.235159	-0.496502	-1.44123	201	0.000965251	0.0188508	0.737574	1.93965	4	0.000194099	0.00858641	0.737574	1.93851	0
GNF2_EIF3S6	0.55847	0.831746	0.0795993	0.258202	2788	0.553411	0.802942	-0.343915	-0.951584	2149	1	1	-0.150287	-0.498817	5131	0.000188395	0.00952726	0.621333	1.85564	0	0.000187512	0.00858641	0.621333	1.85588	0
GNF2_FBL	0.665205	0.874964	-0.0670247	-0.194744	3337	0.729877	0.882936	0.332494	0.827011	4560	0.897787	0.965522	-0.240262	-0.81794	4584	0.000184502	0.00952726	0.628525	1.92068	0	0.000187021	0.00858641	0.628525	1.92137	0
GNF2_HDAC1	0.727762	0.895397	-0.0704519	-0.243783	3648	0.111408	0.417748	0.541096	1.30552	667	0.315974	0.640931	-0.328232	-1.06771	1625	0.000189825	0.00952726	0.740877	2.16329	0	0.000189394	0.00858641	0.740877	2.16869	0
GNF2_KPNB1	0.449609	0.793399	-0.107053	-0.444061	2243	0.0590695	0.320312	0.642109	1.49696	338	0.0128255	0.128887	-0.489778	-1.51137	65	0.000192419	0.00952726	0.713842	1.98339	0	0.000192493	0.00858641	0.713842	1.98991	0
GNF2_RAN	0.277701	0.738406	0.127077	0.493708	1400	0.572769	0.812538	-0.354175	-0.940342	2380	0.145356	0.455723	-0.378512	-1.20198	747	0.000571973	0.0143937	0.626699	1.79464	2	0.000192456	0.00858641	0.626699	1.79623	0
GNF2_RBBP6	0.585068	0.842656	0.0956592	0.39431	2922	0.0611423	0.324598	0.639142	1.48669	348	0.536249	0.798892	-0.310174	-0.955071	2758	0.000192753	0.00952726	0.738887	2.04837	0	0.000191865	0.00858641	0.738887	2.05589	0
GNF2_TDG	0.260103	0.738406	-0.178241	-0.819451	1312	0.0819915	0.364687	0.659594	1.40461	442	0.00154589	0.0341047	-0.655888	-1.77187	7	0.000194439	0.00952726	0.843605	2.07745	0	0.00019581	0.00858641	0.843605	2.07576	0
GNF2_XRCC5	0.620448	0.858135	0.0909831	0.366504	3100	0.191174	0.522464	0.507828	1.1858	1095	0.03345	0.216805	-0.454475	-1.40503	171	0.00019216	0.00952726	0.74492	2.07556	0	0.000192864	0.00858641	0.74492	2.08023	0
GO_ACTIN_BINDING	0.523239	0.818247	-0.945794	-1.53171	2532	0.000335121	0.0373117	-0.53219	-1.63547	0	0.0189601	0.163509	-0.346093	-1.29021	96	0.000230787	0.00952726	-0.499457	-1.70341	0	0.000228363	0.00858641	-0.499457	-1.70146	0
GO_ACTIN_FILAMENT_ORGANIZATION	0.611031	0.855494	-0.559735	-0.91025	2957	0.0527546	0.305683	-0.393273	-1.20869	157	0.00233191	0.0436597	-0.375658	-1.40501	11	0.000231214	0.00952726	-0.507501	-1.73293	0	0.000228781	0.00858641	-0.507501	-1.73151	0
GO_ALCOHOL_METABOLIC_PROCESS	0.811523	0.926663	-0.0432133	-0.0752566	3943	0.101103	0.399256	-0.389516	-1.17212	329	0.0862984	0.349793	-0.32303	-1.1819	438	0.000451977	0.0122688	-0.523651	-1.74972	1	0.000220361	0.00858641	-0.523651	-1.7528	0
GO_ALTERNATIVE_MRNA_SPLICING_VIA_SPLICEOSOME	0.78405	0.916602	-0.0735936	-0.288151	3902	0.529544	0.789819	0.393516	0.925106	3055	0.521064	0.788835	-0.307755	-0.96425	2683	0.000192345	0.00952726	0.733122	2.05791	0	0.000193386	0.00858641	0.733122	2.06378	0
GO_AMINOGLYCAN_BIOSYNTHETIC_PROCESS	0.894895	0.958847	-0.0559809	-0.188557	4469	0.690912	0.867392	0.358013	0.835977	3960	0.0192196	0.164439	-0.461266	-1.44523	98	0.000208203	0.00952726	-0.694292	-1.99375	0	0.000206996	0.00858641	-0.694292	-1.99393	0
GO_AMINOGLYCAN_METABOLIC_PROCESS	0.438408	0.790118	-0.0882886	-0.241854	2202	0.633023	0.839262	-0.335431	-0.91521	2514	0.00427932	0.0659516	-0.464193	-1.53655	21	0.000213493	0.00952726	-0.613638	-1.86744	0	0.000213767	0.00858641	-0.613638	-1.85938	0
GO_ANAPHASE_PROMOTING_COMPLEX_DEPENDENT_CATABOLIC_PROCESS	0.275356	0.738406	-0.130461	-0.515917	1370	0.438075	0.731848	0.419283	0.981473	2521	0.157495	0.470794	0.390665	1.20829	766	0.000191755	0.00952726	0.730701	2.04071	0	0.000192864	0.00858641	0.730701	2.04573	0
GO_ANION_TRANSPORT	0.814542	0.927937	-0.0429595	-0.0607222	3864	0.00765484	0.129465	-0.420986	-1.31363	21	0.503758	0.777177	-0.259183	-0.983853	2546	0.000466853	0.0123571	-0.435627	-1.51192	1	0.000231374	0.00858641	-0.435627	-1.51159	0
GO_APICAL_PART_OF_CELL	0.626361	0.860446	0.0714818	0.119374	3221	0.17503	0.501897	-0.37585	-1.1216	585	0.356876	0.672629	-0.283566	-1.03179	1813	0.000453206	0.0122688	-0.513917	-1.70527	1	0.000219974	0.00858641	-0.513917	-1.70741	0
GO_AXON_DEVELOPMENT	0.521012	0.817931	0.967592	1.41081	2739	0.438881	0.732177	0.360182	0.961789	3198	0.00992457	0.110391	-0.340748	-1.29606	49	0.000237135	0.00952726	-0.520328	-1.81328	0	0.000235627	0.00858641	-0.520328	-1.81391	0
GO_BASOLATERAL_PLASMA_MEMBRANE	0.728619	0.895596	0.0545416	0.12364	3688	0.0604775	0.323106	-0.452962	-1.27792	227	0.10275	0.382825	-0.350985	-1.20328	522	0.000217675	0.00952726	-0.59844	-1.88594	0	0.000214362	0.00858641	-0.59844	-1.88147	0
GO_CATALYTIC_ACTIVITY_ACTING_ON_RNA	0.878938	0.952298	-0.0364594	-0.0611565	4268	0.0503332	0.297944	0.58134	1.53387	354	0.000205212	0.00934237	0.457895	1.70154	0	0.00017618	0.00952726	0.517281	1.72635	0	0.00017762	0.00858641	0.517281	1.7347	0
GO_CATALYTIC_STEP_2_SPLICEOSOME	0.190018	0.737303	-0.180159	-0.700042	947	0.133598	0.450745	0.533414	1.26281	774	0.447132	0.738804	-0.317919	-0.998383	2291	0.000192382	0.00952726	0.698081	1.97544	0	0.000193125	0.00858641	0.698081	1.9814	0
GO_CATION_TRANSMEMBRANE_TRANSPORTER_ACTIVITY	0.629355	0.861281	0.835417	1.17609	3305	0.0227653	0.213905	-0.415771	-1.27849	67	0.69767	0.882893	-0.248182	-0.933873	3532	0.000693963	0.0161325	-0.441159	-1.51604	2	0.000229991	0.00858641	-0.441159	-1.51613	0
GO_CELL_ADHESION_MOLECULE_BINDING	0.360387	0.756632	-0.999066	-1.45168	1713	0.000367377	0.039286	-0.504091	-1.58461	0	0.00296443	0.0513876	-0.357613	-1.35988	14	0.000471476	0.0124151	-0.434501	-1.51273	1	0.000232288	0.00858641	-0.434501	-1.51383	0
GO_CELL_CELL_ADHESION_VIA_PLASMA_MEMBRANE_ADHESION_MOLECULES	0.457774	0.796424	0.167928	0.354064	2319	0.0760615	0.354894	-0.455618	-1.26393	291	0.00939886	0.106837	-0.420846	-1.43653	47	0.00021575	0.00952726	-0.615733	-1.91823	0	0.00021395	0.00858641	-0.615733	-1.91042	0
GO_CELL_CELL_JUNCTION	0.353945	0.753873	-0.999069	-1.54454	1699	0.00202225	0.0806041	-0.461369	-1.42778	5	0.00432305	0.0660507	-0.362863	-1.36026	21	0.000229305	0.00952726	-0.523211	-1.79494	0	0.000228206	0.00858641	-0.523211	-1.79439	0
GO_CELL_JUNCTION_ASSEMBLY	0.336416	0.748853	-0.999071	-1.64753	1636	0.00062637	0.0496831	-0.496996	-1.50755	1	0.106183	0.390042	-0.313097	-1.15535	540	0.000228363	0.00952726	-0.508333	-1.71405	0	0.000223664	0.00858641	-0.508333	-1.71489	0
GO_CELL_LEADING_EDGE	0.473041	0.801671	0.984191	1.59718	2438	0.0853369	0.371232	-0.379227	-1.17013	251	0.0225462	0.178622	-0.340529	-1.27474	115	0.000457771	0.0122688	-0.460384	-1.57859	1	0.000227635	0.00858641	-0.460384	-1.57879	0
GO_CELL_MORPHOGENESIS_INVOLVED_IN_NEURON_DIFFERENTIATION	0.647022	0.86801	-0.78026	-1.09706	3062	0.00119522	0.063484	-0.449341	-1.4277	2	0.000594059	0.0191592	-0.376739	-1.45041	2	0.000240674	0.00952726	-0.52954	-1.8684	0	0.000235571	0.00858641	-0.52954	-1.87373	0
GO_CELL_PROJECTION_MEMBRANE	0.0409483	0.57625	0.999846	1.85763	208	0.235294	0.565373	-0.364763	-1.0821	799	0.0830047	0.342728	-0.330724	-1.19623	420	0.000452284	0.0122688	-0.481592	-1.58841	1	0.000220216	0.00858641	-0.481592	-1.58958	0
GO_CELL_SUBSTRATE_ADHESION	0.323342	0.744413	-0.999073	-1.76626	1574	0.0720288	0.346283	-0.403373	-1.20644	239	0.118434	0.412896	-0.317329	-1.15464	601	0.000453206	0.0122688	-0.531945	-1.7651	1	0.000219974	0.00858641	-0.531945	-1.76731	0
GO_CELLULAR_RESPONSE_TO_HORMONE_STIMULUS	0.42594	0.784707	0.998752	1.38646	2242	0.0458609	0.287681	-0.374345	-1.18647	117	0.0314837	0.210617	-0.317928	-1.22068	159	0.00023872	0.00952726	-0.519557	-1.82882	0	0.000233318	0.00858641	-0.519557	-1.83317	0
GO_CELLULAR_RESPONSE_TO_INSULIN_STIMULUS	0.856236	0.943615	0.045989	0.106362	4317	0.00557258	0.115149	-0.496852	-1.44894	19	0.0416013	0.242333	-0.368283	-1.29055	211	0.000219443	0.00952726	-0.570971	-1.84316	0	0.00021575	0.00858641	-0.570971	-1.83698	0
GO_CELLULAR_RESPONSE_TO_PEPTIDE	0.776851	0.913751	0.0456018	0.0781922	4006	0.00732018	0.127212	-0.451286	-1.37253	22	0.0353913	0.223578	-0.340718	-1.25466	179	0.000229305	0.00952726	-0.534613	-1.80062	0	0.000222272	0.00858641	-0.534613	-1.80279	0
GO_CELLULAR_RESPONSE_TO_PEPTIDE_HORMONE_STIMULUS	0.677229	0.878628	0.0549187	0.103394	3440	0.00513595	0.112198	-0.470239	-1.40798	16	0.0243902	0.185606	-0.357528	-1.2968	123	0.00022748	0.00952726	-0.548904	-1.81835	0	0.000219925	0.00858641	-0.548904	-1.82276	0
GO_COLLAGEN_CONTAINING_EXTRACELLULAR_MATRIX	0.61166	0.855605	-0.0809168	-0.135955	2968	0.000283046	0.0373117	-0.597945	-1.75793	0	0.00117924	0.0290207	-0.409684	-1.47175	5	0.000223464	0.00952726	-0.588524	-1.9253	0	0.00021901	0.00858641	-0.588524	-1.9228	0
GO_CYTOSOLIC_RIBOSOME	0.573614	0.838334	-0.0820953	-0.281562	2886	0.997151	0.998535	0.248651	0.59884	5950	0.92154	0.973645	0.238792	0.771794	4474	0.000188929	0.00952726	0.634609	1.84848	0	0.00019044	0.00858641	0.634609	1.85414	0
GO_DISTAL_AXON	0.0105928	0.347577	-0.999961	-1.9068	51	0.00447494	0.105781	-0.481101	-1.43406	14	0.0815603	0.340188	-0.331623	-1.199	413	0.000452182	0.0122688	-0.49882	-1.64783	1	0.000220022	0.00858641	-0.49882	-1.64906	0
GO_DNA_TEMPLATED_TRANSCRIPTION_TERMINATION	0.526169	0.81891	0.0986373	0.396481	2643	0.148556	0.470353	0.536989	1.24705	848	0.0419408	0.242928	0.466739	1.4256	203	0.000192567	0.00952726	0.726289	2.01004	0	0.00019216	0.00858641	0.726289	2.01653	0
GO_ENDOCYTOSIS	0.314367	0.743418	0.999066	1.45096	1651	0.0340351	0.253793	-0.391991	-1.22584	96	0.797739	0.927	-0.239838	-0.909329	4022	0.000233536	0.00952726	-0.48559	-1.6858	0	0.00023218	0.00858641	-0.48559	-1.68459	0
GO_ENDOPEPTIDASE_COMPLEX	0.0836525	0.666852	0.999235	4.16955	414	0.568695	0.810382	-0.370338	-0.937362	2466	0.000204666	0.00934237	0.637508	1.92405	0	0.000193911	0.00952726	0.738757	2.01746	0	0.000192382	0.00858641	0.738757	2.02788	0
GO_ESTABLISHMENT_OF_RNA_LOCALIZATION	0.239808	0.737303	0.999078	2.42577	1199	0.0812072	0.362923	0.564033	1.4276	521	0.804458	0.930026	-0.249572	-0.874099	4113	0.000183318	0.00952726	0.571014	1.79273	0	0.000186116	0.00858641	0.571014	1.79307	0
GO_EXTRACELLULAR_MATRIX	0.697567	0.884869	-0.0765629	-0.11482	3325	0.000302115	0.0373117	-0.535806	-1.6043	0	0.000590784	0.0191592	-0.414816	-1.52185	2	0.000225989	0.00952726	-0.586056	-1.95824	0	0.000220361	0.00858641	-0.586056	-1.96168	0
GO_EXTRACELLULAR_MATRIX_STRUCTURAL_CONSTITUENT	0.398232	0.771049	0.093519	0.267493	1981	0.0025528	0.0868022	-0.646462	-1.64274	10	0.00292455	0.0511205	-0.511616	-1.61511	14	0.000417798	0.0122688	-0.679729	-1.93674	1	0.000207598	0.00858641	-0.679729	-1.93842	0
GO_GLUTAMATERGIC_SYNAPSE	0.478368	0.803441	-0.970366	-1.72139	2332	0.000302297	0.0373117	-0.533385	-1.60052	0	0.000196889	0.00934237	-0.438393	-1.59792	0	0.000451365	0.0122688	-0.501411	-1.67027	1	0.000221092	0.00858641	-0.501411	-1.67054	0
GO_GLYCOPROTEIN_BIOSYNTHETIC_PROCESS	0.947853	0.980338	0.0323733	0.0588355	4834	0.285757	0.612168	-0.350066	-1.05207	946	0.252157	0.580888	-0.29556	-1.0761	1285	0.000452284	0.0122688	-0.503149	-1.67395	1	0.000219829	0.00858641	-0.503149	-1.67611	0
GO_GLYCOPROTEIN_METABOLIC_PROCESS	0.7794	0.914757	-0.0442189	-0.0731858	3790	0.233706	0.564115	-0.35129	-1.07366	709	0.179898	0.50101	-0.297694	-1.10239	919	0.000228676	0.00952726	-0.495373	-1.68316	0	0.000226296	0.00858641	-0.495373	-1.68077	0
GO_GLYCOSPHINGOLIPID_METABOLIC_PROCESS	0.439117	0.790444	-0.120026	-0.531002	2206	0.482403	0.763018	-0.406762	-0.978736	2151	0.798601	0.927105	0.277343	0.802143	3881	0.000415887	0.0122688	-0.691218	-1.83343	1	0.000205592	0.00858641	-0.691218	-1.84473	0
GO_GTPASE_BINDING	0.524543	0.818247	0.962877	1.39043	2756	0.00155642	0.0719685	-0.443371	-1.40564	3	0.000785238	0.0230783	-0.366727	-1.40908	3	0.000240038	0.00952726	-0.500252	-1.76175	0	0.000234137	0.00858641	-0.500252	-1.76609	0
GO_GTPASE_REGULATOR_ACTIVITY	0.453307	0.79509	0.909382	1.75309	2295	0.0973385	0.392821	0.530781	1.37056	650	0.0976616	0.373716	-0.324196	-1.17753	496	0.000451773	0.0122688	-0.528696	-1.75562	1	0.000220313	0.00858641	-0.528696	-1.75683	0
GO_HOMOPHILIC_CELL_ADHESION_VIA_PLASMA_MEMBRANE_ADHESION_MOLECULES	0.30703	0.743062	0.278101	0.795356	1532	0.115548	0.42464	-0.478462	-1.24335	488	0.0200701	0.167748	-0.452637	-1.43983	102	0.000208638	0.00952726	-0.684841	-1.99235	0	0.000208551	0.00858641	-0.684841	-1.98836	0
GO_INTERLEUKIN_1_MEDIATED_SIGNALING_PATHWAY	0.494775	0.80847	0.0928065	0.344943	2461	0.0182664	0.193048	0.788627	1.87081	105	0.00102965	0.0267619	0.551363	1.74527	4	0.000191975	0.00952726	0.671086	1.90645	0	0.000192049	0.00858641	0.671086	1.91195	0
GO_LARGE_RIBOSOMAL_SUBUNIT	0.907426	0.963466	-0.0538899	-0.180373	4557	0.0990099	0.395646	0.549238	1.33643	599	0.0147662	0.141032	0.448951	1.47152	71	0.000188005	0.00952726	0.685042	2.02851	0	0.000188288	0.00858641	0.685042	2.02907	0
GO_MATURATION_OF_5_8S_RRNA	0.375456	0.762067	0.154806	0.719624	1853	0.0431257	0.280894	0.71476	1.53412	233	0.0447515	0.251671	0.545826	1.48896	216	0.00039116	0.0122688	0.797722	1.98603	1	0.000195695	0.00858641	0.797722	1.98001	0
GO_MATURATION_OF_LSU_RRNA	0.791633	0.919817	0.121655	0.55678	3916	0.0219157	0.209526	0.803069	1.65714	115	0.00621375	0.0823083	0.681033	1.75926	29	0.000390854	0.0122688	0.839666	1.98045	1	0.000197511	0.00858641	0.839666	1.97934	0
GO_MATURATION_OF_SSU_RRNA	0.181296	0.737303	0.178381	0.807346	914	0.0304066	0.242043	0.756878	1.69214	168	0.000822876	0.0232015	0.64102	1.85399	3	0.000772201	0.0170726	0.742615	1.9529	3	0.000194099	0.00858641	0.742615	1.95176	0
GO_MEMBRANE_REGION	0.478598	0.803574	-0.9316	-1.69964	2347	0.211765	0.544457	-0.369487	-1.09612	719	0.00118203	0.0290207	-0.414296	-1.4979	5	0.00022604	0.00952726	-0.535198	-1.76441	0	0.000220848	0.00858641	-0.535198	-1.76476	0
GO_METAL_ION_TRANSMEMBRANE_TRANSPORTER_ACTIVITY	0.540955	0.824747	0.83542	1.39321	2786	0.0714286	0.345617	-0.420686	-1.23539	251	0.606073	0.837245	-0.262431	-0.946849	3073	0.000449035	0.0122688	-0.51271	-1.68437	1	0.000218627	0.00858641	-0.51271	-1.68263	0
GO_MITOCHONDRIAL_GENE_EXPRESSION	0.828646	0.932804	-0.0523698	-0.140105	4153	0.0841358	0.369251	0.561744	1.41062	532	0.00020284	0.00934237	0.54855	1.88944	0	0.000184162	0.00952726	0.676944	2.09683	0	0.000186359	0.00858641	0.676944	2.10363	0
GO_MITOCHONDRIAL_PROTEIN_COMPLEX	0.957061	0.983657	0.0345479	0.0722756	4858	0.188629	0.519372	0.447337	1.15616	1263	0.000203169	0.00934237	0.470112	1.68803	0	0.000179372	0.00952726	0.601963	1.95037	0	0.00018305	0.00858641	0.601963	1.95339	0
GO_MITOCHONDRIAL_TRANSLATION	0.984516	0.99368	0.0398405	0.120188	4895	0.0812903	0.362924	0.574771	1.41887	503	0.00020404	0.00934237	0.580961	1.94754	0	0.000186324	0.00952726	0.697404	2.11055	0	0.000187688	0.00858641	0.697404	2.11231	0
GO_MITOCHONDRIAL_TRANSLATIONAL_TERMINATION	0.919368	0.969047	0.0587168	0.224814	4594	0.0520103	0.302741	0.656491	1.56211	303	0.000205931	0.00934237	0.620642	1.96457	0	0.000190658	0.00952726	0.737236	2.11118	0	0.000192456	0.00858641	0.737236	2.11305	0
GO_MONOCARBOXYLIC_ACID_METABOLIC_PROCESS	0.848344	0.940062	-0.037481	-0.0523485	4021	0.000774893	0.0537783	-0.456681	-1.4462	1	0.01928	0.164819	-0.324736	-1.24794	97	0.000474383	0.0124294	-0.434213	-1.52773	1	0.000234742	0.00858641	-0.434213	-1.52993	0
GO_MRNA_3_END_PROCESSING	0.418679	0.78191	-0.100276	-0.360051	2097	0.104493	0.405001	0.550538	1.32099	620	0.672639	0.871606	-0.279305	-0.901591	3453	0.000189286	0.00952726	0.633816	1.83783	0	0.000190985	0.00858641	0.633816	1.84179	0
GO_MRNA_BINDING	0.493713	0.80794	-0.970211	-1.65851	2394	0.201624	0.534388	0.43865	1.13851	1365	0.49823	0.774612	-0.268881	-0.982855	2533	0.000179244	0.00952726	0.553153	1.80276	0	0.000182849	0.00858641	0.553153	1.80783	0
GO_MRNA_PROCESSING	0.421895	0.783399	-0.998911	-1.45111	2003	0.0510422	0.300499	0.546962	1.47659	381	0.877431	0.959097	0.232854	0.887811	4330	0.000171821	0.00952726	0.619531	2.12037	0	0.000174246	0.00858641	0.619531	2.1222	0
GO_NCRNA_3_END_PROCESSING	0.460674	0.797462	-0.136081	-0.621621	2295	0.051898	0.302667	0.690327	1.49938	282	0.00165666	0.0349135	0.664093	1.83693	7	0.000386623	0.0122688	0.795618	2.01411	1	0.000195542	0.00858641	0.795618	2.00323	0
GO_NCRNA_METABOLIC_PROCESS	0.841677	0.937473	-0.0381054	-0.057666	4034	0.00700337	0.124607	0.607364	1.63518	51	0.000203335	0.00934237	0.499244	1.89664	0	0.000172236	0.00952726	0.624747	2.13376	0	0.000173974	0.00858641	0.624747	2.13559	0
GO_NCRNA_PROCESSING	0.898249	0.960178	0.0355154	0.0584323	4616	0.0030564	0.089656	0.659345	1.75277	21	0.000202429	0.00934237	0.52445	1.96327	0	0.000174795	0.00952726	0.648663	2.18385	0	0.000176118	0.00858641	0.648663	2.19042	0
GO_NCRNA_TRANSCRIPTION	0.0452807	0.594755	0.999694	3.43227	224	0.167829	0.49417	0.494495	1.19532	1010	0.0460716	0.255883	0.41622	1.35107	223	0.000188395	0.00952726	0.622862	1.83067	0	0.00018875	0.00858641	0.622862	1.83294	0
GO_NEURON_PROJECTION_GUIDANCE	0.592724	0.846833	0.0649305	0.128596	2997	0.00853443	0.136443	-0.466195	-1.38146	28	0.00137633	0.0313403	-0.412257	-1.4825	6	0.000224669	0.00952726	-0.568907	-1.87319	0	0.000219394	0.00858641	-0.568907	-1.87111	0
GO_NEURON_TO_NEURON_SYNAPSE	0.309084	0.743062	0.999034	1.73449	1588	0.000311818	0.0373117	-0.558985	-1.68709	0	0.0192648	0.164758	-0.356954	-1.30965	97	0.000228311	0.00952726	-0.602421	-2.01629	0	0.000222074	0.00858641	-0.602421	-2.01816	0
GO_NUCLEAR_EXPORT	0.0714286	0.66302	0.999693	2.4062	356	0.105386	0.40707	0.526688	1.3331	676	0.480354	0.761627	-0.281459	-0.986807	2444	0.000183486	0.00952726	0.552647	1.73698	0	0.000185563	0.00858641	0.552647	1.73839	0
GO_NUCLEAR_SPECK	0.422378	0.783471	-0.998878	-1.65604	2045	0.0688437	0.34055	0.557298	1.47239	486	0.910037	0.970095	-0.231933	-0.869279	4632	0.000175716	0.00952726	0.543562	1.81886	0	0.000176087	0.00858641	0.543562	1.82764	0
GO_NUCLEOBASE_CONTAINING_COMPOUND_TRANSPORT	0.27142	0.738406	0.999076	2.09011	1377	0.101053	0.399212	0.528499	1.35964	671	0.596755	0.832787	-0.263696	-0.948857	3015	0.000179404	0.00952726	0.548839	1.76456	0	0.000182548	0.00858641	0.548839	1.76863	0
GO_ORGANELLAR_RIBOSOME	0.583748	0.842127	0.0875353	0.337855	2930	0.0508242	0.299477	0.654898	1.5568	295	0.000205931	0.00934237	0.594702	1.87518	0	0.000191168	0.00952726	0.719663	2.05223	0	0.000192123	0.00858641	0.719663	2.05877	0
GO_ORGANELLE_INNER_MEMBRANE	0.308796	0.743062	-0.999183	-1.45602	1463	0.234751	0.564909	0.406654	1.09759	1754	0.000405762	0.0152845	0.388001	1.48148	1	0.00017138	0.00952726	0.485197	1.66342	0	0.00017343	0.00858641	0.485197	1.66517	0
GO_ORGANIC_HYDROXY_COMPOUND_METABOLIC_PROCESS	0.784842	0.916748	-0.0457785	-0.0673421	3727	0.0352575	0.256491	-0.393059	-1.22291	101	0.0978218	0.374001	-0.303697	-1.14857	493	0.000233645	0.00952726	-0.471109	-1.6277	0	0.000230681	0.00858641	-0.471109	-1.62675	0
GO_PEPTIDASE_COMPLEX	0.101288	0.679716	0.999235	3.88215	510	0.233729	0.564115	-0.430218	-1.12737	983	0.000205381	0.00934237	0.631963	1.97992	0	0.000385208	0.0122688	0.66353	1.87226	1	0.000193125	0.00858641	0.66353	1.88041	0
GO_PHOSPHATIDYLINOSITOL_BINDING	0.466355	0.799215	-0.10719	-0.22388	2293	0.0552878	0.309511	-0.424826	-1.25584	194	0.179396	0.500564	-0.316089	-1.12586	908	0.000446329	0.0122688	-0.549812	-1.7968	1	0.000219154	0.00858641	-0.549812	-1.7949	0
GO_PHOSPHOLIPID_BINDING	0.647302	0.868247	-0.0870232	-0.138785	3130	0.0775949	0.357038	-0.383209	-1.17862	230	0.0305151	0.20753	-0.335692	-1.25601	156	0.000231107	0.00952726	-0.499648	-1.70877	0	0.000226552	0.00858641	-0.499648	-1.7102	0
GO_PHOSPHOLIPID_METABOLIC_PROCESS	0.0365929	0.562885	-0.999884	-1.59462	176	0.194005	0.525654	-0.352275	-1.0896	575	0.680976	0.876496	-0.249653	-0.935903	3489	0.000230309	0.00952726	-0.457807	-1.57041	0	0.000226912	0.00858641	-0.457807	-1.57203	0
GO_POSITIVE_REGULATION_OF_CELL_PROJECTION_ORGANIZATION	0.636876	0.864038	0.0663065	0.111237	3277	0.0616461	0.325557	-0.392376	-1.20086	184	0.0209557	0.172032	-0.348099	-1.29088	106	0.00023015	0.00952726	-0.514871	-1.75031	0	0.000226552	0.00858641	-0.514871	-1.74961	0
GO_POSITIVE_REGULATION_OF_GTPASE_ACTIVITY	0.508587	0.814209	0.909382	1.54673	2605	0.128134	0.44246	0.488456	1.2744	878	0.0243376	0.185606	-0.347767	-1.28328	123	0.000228258	0.00952726	-0.509222	-1.72136	0	0.000224669	0.00858641	-0.509222	-1.72057	0
GO_POSITIVE_REGULATION_OF_NEURON_PROJECTION_DEVELOPMENT	0.563884	0.833882	0.0697312	0.137472	2850	0.0152375	0.177502	-0.446819	-1.33079	50	0.00689248	0.0884013	-0.384495	-1.38978	34	0.000451977	0.0122688	-0.497256	-1.64083	1	0.000220361	0.00858641	-0.497256	-1.64166	0
GO_POSTSYNAPSE	0.558017	0.831705	-0.970733	-1.35641	2644	0.000371747	0.0395441	-0.558397	-1.76283	0	0.0051161	0.0728302	-0.347975	-1.33379	25	0.000237417	0.00952726	-0.532272	-1.86415	0	0.000234797	0.00858641	-0.532272	-1.86649	0
GO_PRERIBOSOME	0.322064	0.744413	0.121797	0.486545	1609	0.0263386	0.228272	0.750564	1.76448	151	0.000206356	0.00934237	0.641927	1.9934	0	0.000192345	0.00952726	0.788986	2.21473	0	0.000193386	0.00858641	0.788986	2.22105	0
GO_PRESYNAPSE	0.0229549	0.486395	-0.999922	-1.50469	109	0.00034153	0.0373117	-0.516944	-1.60778	0	0.0297501	0.205489	-0.330107	-1.24463	149	0.000230627	0.00952726	-0.485397	-1.67567	0	0.000230044	0.00858641	-0.485397	-1.67353	0
GO_PROTEIN_KINASE_ACTIVITY	0.815484	0.928178	0.0423264	0.0602334	4286	0.00388802	0.0987197	-0.42341	-1.34079	9	0.0376132	0.230866	-0.315451	-1.21065	190	0.000474721	0.0124294	-0.44053	-1.55051	1	0.000234357	0.00858641	-0.44053	-1.55259	0
GO_RECEPTOR_COMPLEX	0.253447	0.738406	0.999227	1.73134	1304	0.0587571	0.319231	-0.430715	-1.2603	207	0.409379	0.710185	-0.281387	-1.01251	2068	0.00044613	0.0122688	-0.532678	-1.73915	1	0.000218675	0.00858641	-0.532678	-1.73784	0
GO_REGULATION_OF_ACTIN_FILAMENT_BASED_PROCESS	0.398603	0.771337	0.998801	1.6801	2053	0.0595162	0.320748	-0.398769	-1.2128	186	0.000588351	0.0191592	-0.402914	-1.49015	2	0.000228258	0.00952726	-0.518822	-1.75381	0	0.000224669	0.00858641	-0.518822	-1.753	0
GO_REGULATION_OF_CELL_MORPHOGENESIS	0.617905	0.856721	-0.752358	-1.13215	2960	0.000713267	0.0524731	-0.458794	-1.4372	1	0.0225118	0.178596	-0.330321	-1.25198	113	0.000233918	0.00952726	-0.490416	-1.70466	0	0.000232396	0.00858641	-0.490416	-1.7031	0
GO_REGULATION_OF_CELL_MORPHOGENESIS_INVOLVED_IN_DIFFERENTIATION	0.493295	0.807711	-0.752361	-1.40983	2427	0.00392987	0.0988714	-0.472415	-1.41757	12	0.122941	0.420557	-0.315882	-1.1501	626	0.000453515	0.0122688	-0.494239	-1.64327	1	0.000220459	0.00858641	-0.494239	-1.64459	0
GO_REGULATION_OF_CELLULAR_RESPONSE_TO_INSULIN_STIMULUS	0.706552	0.888503	-0.0850728	-0.355627	3536	0.810604	0.915707	-0.325448	-0.806549	3607	0.765783	0.914272	-0.28382	-0.842617	3929	0.000416146	0.0122688	-0.690515	-1.87124	1	0.000205846	0.00858641	-0.690515	-1.87985	0
GO_REGULATION_OF_GTPASE_ACTIVITY	0.541002	0.824747	0.909382	1.42808	2816	0.179498	0.506681	0.441889	1.16604	1265	0.0154303	0.144495	-0.342123	-1.28615	77	0.000231481	0.00952726	-0.491819	-1.69436	0	0.000230787	0.00858641	-0.491819	-1.69284	0
GO_REGULATION_OF_MRNA_CATABOLIC_PROCESS	0.763666	0.909371	-0.0535759	-0.131086	3799	0.351006	0.668283	0.401239	1.01505	2250	0.357815	0.673817	0.297246	1.03389	1748	0.000183419	0.00952726	0.56961	1.78384	0	0.000185667	0.00858641	0.56961	1.78606	0
GO_REGULATION_OF_MRNA_METABOLIC_PROCESS	0.724729	0.894988	-0.0503405	-0.0908852	3548	0.16342	0.489752	0.454579	1.19302	1140	0.843719	0.946099	-0.239264	-0.884299	4291	0.000177557	0.00952726	0.603165	1.99037	0	0.000179404	0.00858641	0.603165	2.00001	0
GO_REGULATION_OF_MRNA_PROCESSING	0.587289	0.843953	-0.0735661	-0.216512	2956	0.0970796	0.392175	0.546561	1.35191	604	0.158656	0.472961	-0.342965	-1.16214	811	0.000184775	0.00952726	0.627025	1.9041	0	0.000188501	0.00858641	0.627025	1.90328	0
GO_REGULATION_OF_MRNA_SPLICING_VIA_SPLICEOSOME	0.558636	0.831746	-0.0839918	-0.290635	2800	0.110757	0.416797	0.541793	1.30483	660	0.159069	0.473782	-0.362199	-1.18119	819	0.00018943	0.00952726	0.656715	1.91559	0	0.000189573	0.00858641	0.656715	1.92176	0
GO_REGULATION_OF_NEURON_PROJECTION_DEVELOPMENT	0.619168	0.857298	-0.774946	-1.14527	2945	0.00146951	0.0695556	-0.44484	-1.39836	3	0.0126208	0.128141	-0.336902	-1.28408	63	0.000236463	0.00952726	-0.457494	-1.59464	0	0.000235128	0.00858641	-0.457494	-1.59468	0
GO_REGULATION_OF_NEUROTRANSMITTER_RECEPTOR_ACTIVITY	0.110331	0.681096	0.999044	4.16521	549	0.0712244	0.345457	-0.585498	-1.37134	323	0.222244	0.5499	-0.408734	-1.16564	1140	0.000827472	0.0179063	-0.708226	-1.83952	3	0.000203004	0.00858641	-0.708226	-1.84866	0
GO_REGULATION_OF_RNA_SPLICING	0.458441	0.79655	-0.086539	-0.249654	2299	0.28856	0.614876	0.429613	1.06204	1795	0.158606	0.472881	-0.344277	-1.16489	809	0.000184775	0.00952726	0.632119	1.91957	0	0.000188501	0.00858641	0.632119	1.91874	0
GO_REGULATION_OF_SYSTEM_PROCESS	0.0656704	0.662944	-0.999805	-1.43884	311	0.000338181	0.0373117	-0.484793	-1.49473	0	0.0316644	0.211072	-0.329855	-1.24148	159	0.000230256	0.00952726	-0.467139	-1.60546	0	0.000229358	0.00858641	-0.467139	-1.60523	0
GO_REGULATION_OF_TRANSMEMBRANE_TRANSPORT	0.329905	0.746785	0.999027	1.44741	1731	0.000331895	0.0373117	-0.496347	-1.52291	0	0.351304	0.669198	-0.274818	-1.02926	1804	0.000693963	0.0161325	-0.446937	-1.52638	2	0.000227998	0.00858641	-0.446937	-1.52638	0
GO_REGULATION_OF_VESICLE_MEDIATED_TRANSPORT	0.330156	0.746785	0.999028	1.46561	1731	0.313081	0.635947	-0.330318	-1.03604	875	0.745944	0.906033	-0.243335	-0.922317	3769	0.000234137	0.00952726	-0.463608	-1.61216	0	0.000232342	0.00858641	-0.463608	-1.61121	0
GO_RESPONSE_TO_INSULIN	0.804286	0.92441	-0.045508	-0.0926266	3977	0.00206429	0.0806041	-0.498971	-1.48034	6	0.0242947	0.185527	-0.367662	-1.32013	123	0.000449035	0.0122688	-0.531926	-1.74749	1	0.000218627	0.00858641	-0.531926	-1.74569	0
GO_RESPONSE_TO_PEPTIDE	0.682114	0.879444	0.585399	0.871398	3561	0.274691	0.602996	0.400324	1.06088	1957	0.02213	0.177285	-0.334156	-1.26281	111	0.000234082	0.00952726	-0.4976	-1.72057	0	0.00023116	0.00858641	-0.4976	-1.72004	0
GO_RESPONSE_TO_PEPTIDE_HORMONE	0.0662539	0.663001	-0.999806	-1.61636	320	0.00300903	0.0890572	-0.456061	-1.40241	8	0.00508707	0.0728175	-0.364645	-1.36021	25	0.000230787	0.00952726	-0.52595	-1.79376	0	0.000228363	0.00858641	-0.52595	-1.79171	0
GO_RESPONSE_TO_WOUNDING	0.55619	0.831145	0.94335	1.31294	2919	0.164336	0.490864	0.447548	1.19212	1186	0.0519196	0.270573	-0.313507	-1.19097	260	0.000471476	0.0124151	-0.442623	-1.5406	1	0.000232126	0.00858641	-0.442623	-1.54152	0
GO_RIBONUCLEOPROTEIN_COMPLEX_BINDING	0.446126	0.792755	0.0898782	0.276879	2210	0.252799	0.582315	0.447832	1.09923	1557	0.0101999	0.111633	0.454759	1.51279	49	0.000188076	0.00952726	0.686926	2.06227	0	0.000188501	0.00858641	0.686926	2.06447	0
GO_RIBONUCLEOPROTEIN_COMPLEX_BIOGENESIS	0.91201	0.965794	-0.031938	-0.0491447	4373	0.01035	0.149738	0.608558	1.63186	75	0.000202799	0.00934237	0.43376	1.63949	0	0.00017328	0.00952726	0.685341	2.32789	0	0.000174155	0.00858641	0.685341	2.33274	0
GO_RIBONUCLEOPROTEIN_COMPLEX_SUBUNIT_ORGANIZATION	0.441432	0.791225	-0.0959456	-0.217527	2181	0.133395	0.450393	0.495172	1.25517	859	0.290499	0.618124	0.304794	1.06409	1430	0.000183217	0.00952726	0.6296	1.9808	0	0.000185529	0.00858641	0.6296	1.98135	0
GO_RIBOSOMAL_LARGE_SUBUNIT_BIOGENESIS	0.876472	0.950945	0.0703721	0.287236	4391	0.0320603	0.247222	0.734789	1.70917	182	0.000617792	0.019381	0.581793	1.78595	2	0.000192753	0.00952726	0.786703	2.18092	0	0.000191865	0.00858641	0.786703	2.18893	0
GO_RIBOSOMAL_SMALL_SUBUNIT_BIOGENESIS	0.182399	0.737303	0.171716	0.70089	913	0.0376372	0.262486	0.712118	1.66017	215	0.000205931	0.00934237	0.613424	1.88305	0	0.000192419	0.00952726	0.745184	2.07047	0	0.000192493	0.00858641	0.745184	2.07727	0
GO_RIBOSOMAL_SUBUNIT	0.442296	0.791225	0.0864141	0.217509	2218	0.122423	0.433488	0.503702	1.27424	783	0.000818331	0.0232003	0.453541	1.57259	3	0.000183385	0.00952726	0.680342	2.12527	0	0.000185529	0.00858641	0.680342	2.12933	0
GO_RIBOSOME	0.77769	0.914345	0.0502926	0.112866	3945	0.16495	0.491132	0.465153	1.19221	1088	0.000407249	0.0152845	0.455764	1.61625	1	0.000180571	0.00952726	0.640095	2.04443	0	0.000184536	0.00858641	0.640095	2.04725	0
GO_RIBOSOME_ASSEMBLY	0.648643	0.868695	-0.0943477	-0.40485	3274	0.0751733	0.35362	0.612181	1.40264	422	0.048496	0.262349	0.471875	1.41514	236	0.000386698	0.0122688	0.728358	1.97983	1	0.000192753	0.00858641	0.728358	1.98637	0
GO_RIBOSOME_BIOGENESIS	0.837214	0.936198	0.041975	0.0789546	4278	0.010439	0.150594	0.654078	1.71703	72	0.000203707	0.00934237	0.505731	1.85536	0	0.000177746	0.00952726	0.709695	2.3407	0	0.000179856	0.00858641	0.709695	2.3515	0
GO_RNA_3_END_PROCESSING	0.642189	0.866469	-0.0696764	-0.206715	3226	0.0830656	0.367117	0.570882	1.41126	516	0.23619	0.565337	0.327955	1.10272	1162	0.000185494	0.00952726	0.674344	2.04403	0	0.00018797	0.00858641	0.674344	2.04478	0
GO_RNA_CATABOLIC_PROCESS	0.77546	0.913196	-0.0447884	-0.0735455	3753	0.285734	0.612168	0.397384	1.05324	2036	0.736406	0.901726	0.244663	0.914734	3642	0.000175716	0.00952726	0.541652	1.81732	0	0.000176897	0.00858641	0.541652	1.82356	0
GO_RNA_EXPORT_FROM_NUCLEUS	0.0566453	0.642474	0.999693	2.98959	282	0.0529374	0.306272	0.642382	1.5826	327	0.662088	0.866101	-0.271896	-0.914801	3373	0.000187829	0.00952726	0.642263	1.93627	0	0.000186951	0.00858641	0.642263	1.9414	0
GO_RNA_LOCALIZATION	0.254334	0.738406	0.999076	2.24056	1290	0.0698062	0.342523	0.583512	1.49457	460	0.918094	0.973109	-0.234449	-0.8363	4662	0.000180571	0.00952726	0.578514	1.84775	0	0.000184536	0.00858641	0.578514	1.8503	0
GO_RNA_POLYMERASE_ACTIVITY	0.275045	0.738406	0.1585	0.731545	1380	0.0692799	0.341766	0.662825	1.44553	379	0.00351967	0.0581469	0.61814	1.73656	16	0.000774593	0.0170726	0.766445	1.95874	3	0.000195963	0.00858641	0.766445	1.94455	0
GO_RNA_POLYMERASE_COMPLEX	0.711307	0.89009	0.0713033	0.249015	3547	0.0537835	0.306848	0.650727	1.55508	316	0.056092	0.280951	0.415491	1.33407	272	0.000190186	0.00952726	0.645601	1.86775	0	0.000191022	0.00858641	0.645601	1.87202	0
GO_RNA_SPLICING	0.708716	0.889378	-0.0562802	-0.0870073	3398	0.0515944	0.302166	0.559648	1.49745	376	0.815422	0.934102	0.238452	0.89963	4028	0.00017298	0.00952726	0.642654	2.17993	0	0.000174155	0.00858641	0.642654	2.18451	0
GO_RNA_SPLICING_VIA_TRANSESTERIFICATION_REACTIONS	0.703893	0.887664	-0.0526482	-0.0897582	3434	0.0636816	0.329595	0.56991	1.50135	447	0.858904	0.952228	-0.23684	-0.882561	4388	0.000176274	0.00952726	0.666139	2.21565	0	0.00017838	0.00858641	0.666139	2.22566	0
GO_RRNA_BINDING	0.485766	0.804897	0.110294	0.466944	2405	0.12077	0.431498	0.567057	1.29706	677	0.00061212	0.0193604	0.610937	1.8253	2	0.000772499	0.0170726	0.701409	1.90218	3	0.000193386	0.00858641	0.701409	1.90627	0
GO_RRNA_METABOLIC_PROCESS	0.74459	0.902132	-0.0517573	-0.112971	3681	0.0127743	0.164167	0.687528	1.76989	84	0.000203417	0.00934237	0.570302	2.03214	0	0.000179276	0.00952726	0.713659	2.29588	0	0.000182682	0.00858641	0.713659	2.29987	0
GO_SH3_DOMAIN_BINDING	0.0154092	0.415246	-0.999923	-3.19275	76	0.024919	0.222135	-0.517314	-1.39811	99	0.433074	0.728125	-0.307389	-1.00512	2225	0.000211954	0.00952726	-0.638009	-1.91084	0	0.000212495	0.00858641	-0.638009	-1.90583	0
GO_SMALL_GTPASE_BINDING	0.733884	0.898139	-0.0496852	-0.0807065	3551	0.00239562	0.0847114	-0.455586	-1.4175	6	0.0498516	0.265502	-0.320987	-1.20669	251	0.000230627	0.00952726	-0.515782	-1.78056	0	0.000230044	0.00858641	-0.515782	-1.77829	0
GO_SMALL_GTPASE_MEDIATED_SIGNAL_TRANSDUCTION	0.518987	0.81732	0.966486	1.42798	2705	0.309705	0.632501	0.389396	1.03723	2236	0.037309	0.229875	-0.321595	-1.21971	187	0.000469594	0.0124136	-0.444496	-1.54674	1	0.000232829	0.00858641	-0.444496	-1.54644	0
GO_SNRNA_TRANSCRIPTION	0.033	0.554635	0.999694	4.04546	164	0.0838145	0.368736	0.5987	1.39037	478	0.0448837	0.252208	0.459674	1.40798	217	0.00115652	0.0210438	0.670508	1.8588	5	0.000191865	0.00858641	0.670508	1.86563	0
GO_SPLICEOSOMAL_COMPLEX	0.449651	0.793399	-0.0851471	-0.218668	2254	0.0654279	0.333893	0.594613	1.50422	418	0.769306	0.915364	-0.254782	-0.888553	3944	0.000183385	0.00952726	0.654089	2.04326	0	0.000185529	0.00858641	0.654089	2.04716	0
GO_STRUCTURAL_CONSTITUENT_OF_RIBOSOME	0.818364	0.929028	0.0538172	0.148323	4072	0.102316	0.400991	0.533759	1.33443	644	0.00367722	0.0599599	0.448533	1.53102	17	0.00018498	0.00952726	0.652132	2.0031	0	0.000187617	0.00858641	0.652132	2.00701	0
GO_SYNAPSE_ORGANIZATION	0.509399	0.814556	-0.970364	-1.5934	2465	0.000318269	0.0373117	-0.559005	-1.70014	0	0.000977708	0.025881	-0.400515	-1.48275	4	0.000228206	0.00952726	-0.513969	-1.74207	0	0.000225683	0.00858641	-0.513969	-1.74025	0
GO_SYNAPTIC_MEMBRANE	0.306555	0.743062	0.999034	1.7491	1575	0.000281928	0.0373117	-0.55068	-1.62748	0	0.0281607	0.200669	-0.358077	-1.29429	142	0.000224215	0.00952726	-0.546038	-1.79559	0	0.00021925	0.00858641	-0.546038	-1.79297	0
GO_TAXIS	0.723522	0.89477	0.627152	0.873752	3804	0.0954051	0.389463	-0.367822	-1.14804	271	0.186783	0.510175	-0.287694	-1.09045	943	0.0004662	0.0123558	-0.44892	-1.56066	1	0.000232019	0.00858641	-0.44892	-1.55916	0
GO_TRANSLATION_FACTOR_ACTIVITY_RNA_BINDING	0.838038	0.936485	-0.0683799	-0.267343	4185	0.289775	0.616488	0.46315	1.08767	1671	0.698721	0.883443	0.281433	0.873945	3385	0.00134641	0.0232181	0.642802	1.80438	6	0.000193386	0.00858641	0.642802	1.80953	0
GO_TRANSLATIONAL_ELONGATION	0.222778	0.737303	0.99885	3.04375	1112	0.0740801	0.350886	0.592921	1.45695	456	0.000205508	0.00934237	0.56782	1.89269	0	0.000187582	0.00952726	0.657894	1.98145	0	0.000187723	0.00858641	0.657894	1.98433	0
GO_TRANSLATIONAL_INITIATION	0.00877018	0.32068	0.999962	2.51696	43	0.00513299	0.112198	0.744584	1.88421	32	0.188353	0.512072	0.327074	1.13516	924	0.000366838	0.0122688	0.537338	1.68278	1	0.000185667	0.00858641	0.537338	1.68487	0
GO_TRANSLATIONAL_TERMINATION	0.663593	0.874534	0.0747613	0.261092	3309	0.0958472	0.389962	0.557782	1.34724	576	0.000206484	0.00934237	0.609608	1.97198	0	0.000188964	0.00952726	0.729913	2.13749	0	0.000188182	0.00858641	0.729913	2.14289	0
GO_TRANSMEMBRANE_RECEPTOR_PROTEIN_KINASE_ACTIVITY	0.187587	0.737303	0.171626	0.68296	942	0.0707706	0.344578	-0.542579	-1.34466	314	0.138824	0.4452	-0.413277	-1.23445	712	0.000417449	0.0122688	-0.670682	-1.82559	1	0.000205339	0.00858641	-0.670682	-1.83648	0
GO_TUMOR_NECROSIS_FACTOR_MEDIATED_SIGNALING_PATHWAY	0.0625878	0.653646	0.999655	2.91591	311	0.0240865	0.219285	0.743639	1.81597	146	0.000204876	0.00934237	0.578233	1.91614	0	0.000187793	0.00952726	0.609869	1.82502	0	0.000187441	0.00858641	0.609869	1.82547	0
GO_U2_TYPE_SPLICEOSOMAL_COMPLEX	0.312286	0.743304	-0.12196	-0.464848	1547	0.0494505	0.295732	0.659852	1.56857	287	0.219316	0.547255	0.363265	1.14543	1064	0.000382336	0.0122688	0.652811	1.8616	1	0.000192123	0.00858641	0.652811	1.86752	0
GOZGIT_ESR1_TARGETS_UP	0.90768	0.963595	0.0509641	0.156251	4502	0.0793842	0.360142	-0.485505	-1.28903	329	0.000579598	0.0191592	-0.528754	-1.71991	2	0.000421763	0.0122688	-0.617677	-1.82863	1	0.000208594	0.00858641	-0.617677	-1.82479	0
GSE12003_4D_VS_8D_CULTURE_MIR223_KO_BM_PROGENITOR_DN	0.638983	0.865234	-0.0667771	-0.185433	3215	0.00420831	0.101861	-0.533453	-1.50296	15	0.239464	0.568945	-0.328187	-1.10662	1215	0.000216873	0.00952726	-0.632527	-1.9717	0	0.000213584	0.00858641	-0.632527	-1.96511	0
GSE12707_AT16L1_HYPOMORPH_VS_WT_THYMUS_UP	0.794759	0.920508	-0.0639185	-0.216363	3972	0.213055	0.545762	0.485322	1.15157	1236	0.534633	0.798173	0.298648	0.95141	2577	0.000571973	0.0143937	0.628719	1.80043	2	0.000192456	0.00858641	0.628719	1.80202	0
GSE13522_CTRL_VS_T_CRUZI_Y_STRAIN_INF_SKIN_BALBC_MOUSE_DN	0.177419	0.737303	-0.99908	-3.21491	890	0.65253	0.850074	-0.340685	-0.905627	2707	0.0116595	0.121678	-0.454396	-1.47811	59	0.000210793	0.00952726	-0.687642	-2.03948	0	0.000209776	0.00858641	-0.687642	-2.03102	0
GSE14000_TRANSLATED_RNA_VS_MRNA_4H_LPS_DC_UP	0.998201	0.999069	0.0283562	0.0688492	4994	0.0855772	0.371638	0.554199	1.40643	552	0.749409	0.907527	-0.255307	-0.896313	3803	0.000182648	0.00952726	0.571318	1.80076	0	0.000185357	0.00858641	0.571318	1.8025	0
GSE14000_TRANSLATED_RNA_VS_MRNA_DC_UP	0.995405	0.997706	0.0298518	0.0721484	4981	0.0765306	0.355729	0.571791	1.45157	494	0.0582841	0.286295	0.363345	1.27086	285	0.000182415	0.00952726	0.583096	1.84234	0	0.00018457	0.00858641	0.583096	1.84578	0
GSE14699_NAIVE_VS_DELETIONAL_TOLERANCE_CD8_TCELL_DN	0.244378	0.737303	-0.999039	-2.4926	1216	0.344193	0.663408	-0.370961	-1.0411	1309	0.0011744	0.0290207	-0.452599	-1.54525	5	0.000217675	0.00952726	-0.607207	-1.90421	0	0.000214638	0.00858641	-0.607207	-1.89775	0
GSE14769_UNSTIM_VS_60MIN_LPS_BMDM_UP	0.394414	0.769304	-0.109493	-0.267275	1962	0.14751	0.469702	0.485382	1.22364	941	0.000820681	0.0232015	0.454868	1.57482	3	0.00018352	0.00952726	0.582337	1.81803	0	0.000185322	0.00858641	0.582337	1.82273	0
GSE15735_2H_VS_12H_HDAC_INHIBITOR_TREATED_CD4_TCELL_UP	0.732932	0.897565	-0.056666	-0.141381	3649	0.387477	0.696672	-0.355872	-1.01756	1447	0.463506	0.749395	-0.288764	-0.993666	2355	0.000218293	0.00952726	-0.547936	-1.73371	0	0.000215008	0.00858641	-0.547936	-1.73172	0
GSE15767_MED_VS_SCS_MAC_LN_UP	0.915098	0.966781	-0.0444639	-0.115099	4569	0.0190154	0.196967	-0.505576	-1.40252	72	0.339083	0.659307	-0.311032	-1.05036	1729	0.000213767	0.00952726	-0.583305	-1.81384	0	0.000214915	0.00858641	-0.583305	-1.80354	0
GSE16450_CTRL_VS_IFNA_6H_STIM_IMMATURE_NEURON_CELL_LINE_DN	0.635365	0.863223	-0.0642039	-0.16572	3179	0.551183	0.801609	-0.336563	-0.956265	2072	0.0668627	0.306156	-0.365993	-1.25016	340	0.000218055	0.00952726	-0.570806	-1.79521	0	0.000214454	0.00858641	-0.570806	-1.79149	0
GSE17974_0.5H_VS_72H_IL4_AND_ANTI_IL12_ACT_CD4_TCELL_UP	0.723891	0.89477	0.057091	0.141748	3638	0.0838921	0.368757	0.558701	1.4134	537	0.0222995	0.177732	0.392954	1.36679	108	0.00018352	0.00952726	0.561189	1.76009	0	0.000185977	0.00858641	0.561189	1.76118	0
GSE17974_0H_VS_4H_IN_VITRO_ACT_CD4_TCELL_DN	0.666004	0.875166	0.0608084	0.150978	3347	0.089176	0.378054	0.55229	1.38834	565	0.00020404	0.00934237	0.542466	1.87772	0	0.00018379	0.00952726	0.604315	1.87913	0	0.000184162	0.00858641	0.604315	1.88833	0
GSE17974_0H_VS_6H_IN_VITRO_ACT_CD4_TCELL_DN	0.498099	0.810182	-0.0767353	-0.186869	2488	0.339608	0.659538	0.403271	1.0207	2182	0.00428834	0.0659516	0.42593	1.48364	20	0.00018315	0.00952726	0.625045	1.96421	0	0.000185288	0.00858641	0.625045	1.96562	0
GSE17974_1H_VS_72H_UNTREATED_IN_VITRO_CD4_TCELL_UP	0.36004	0.756513	-0.634319	-1.58262	1792	0.0674827	0.338435	0.595418	1.49952	429	0.0107899	0.11574	0.417236	1.44237	52	0.00018379	0.00952726	0.671252	2.08727	0	0.000184162	0.00858641	0.671252	2.09748	0
GSE17974_2.5H_VS_72H_IL4_AND_ANTI_IL12_ACT_CD4_TCELL_UP	0.107794	0.679716	-0.999577	-2.46473	537	0.12171	0.432369	0.506509	1.28483	785	0.453896	0.742264	0.284718	0.992819	2224	0.000366905	0.0122688	0.545731	1.71735	1	0.000186185	0.00858641	0.545731	1.71779	0
GSE19198_6H_VS_24H_IL21_TREATED_TCELL_DN	0.363892	0.757966	0.505709	1.27393	1813	0.026703	0.229887	-0.464808	-1.33872	97	0.10102	0.380227	-0.345304	-1.20005	514	0.000218723	0.00952726	-0.582287	-1.86464	0	0.000217155	0.00858641	-0.582287	-1.85396	0
GSE19941_IL10_KO_VS_IL10_KO_AND_NFKBP50_KO_UNSTIM_MACROPHAGE_DN	0.268869	0.738406	-0.998963	-2.50041	1342	0.570479	0.811318	-0.334298	-0.948459	2144	0.314185	0.639446	-0.306997	-1.05641	1596	0.00021815	0.00952726	-0.558681	-1.76706	0	0.000214546	0.00858641	-0.558681	-1.76543	0
GSE20198_UNTREATED_VS_IFNA_TREATED_ACT_CD4_TCELL_DN	0.862488	0.945664	0.0467012	0.113853	4333	0.0849836	0.370573	0.556003	1.40657	544	0.236767	0.565794	0.315827	1.09856	1162	0.000183385	0.00952726	0.559169	1.75211	0	0.000185874	0.00858641	0.559169	1.75327	0
GSE20727_CTRL_VS_H2O2_TREATED_DC_DN	0.978075	0.991509	0.0358792	0.0903099	4906	0.716364	0.87773	0.332701	0.834316	4530	0.0310779	0.209275	-0.381539	-1.32145	157	0.000218914	0.00952726	-0.592926	-1.88738	0	0.000216216	0.00858641	-0.592926	-1.88009	0
GSE20754_WT_VS_TCF1_KO_MEMORY_CD8_TCELL_UP	0.27504	0.738406	0.998886	2.49014	1383	0.000155958	0.0373117	0.857036	2.16544	0	0.000204583	0.00934237	0.58307	2.02171	0	0.000183318	0.00952726	0.642085	2.00839	0	0.000185632	0.00858641	0.642085	2.01062	0
[truncated: 19,784 more rows]

## Sheet: Supplementary File 2c
Supplementary File 2c: Ame analysis with 100bp of promoter described in Figure 5.
[truncated: 21 more rows]

[truncated: 2 more sheets: Supplementary File 2d, Supplementary File 2e]
