# Supplementary material for: SARS-CoV-2 Nsp14 mediates the effects of viral infection on the host cell transcriptome
Source: eLife. 2022 Mar 16;11:e71945. doi: 10.7554/eLife.71945 (PMC9054133; doi:10.7554/eLife.71945)
Supplement: Supplementary file 3. — Supplementary file 3b: List of plasmids used for severe acute respiratory syndrome coronavirus 2 (SARS-CoV-2) protein expression in the initial screening described in Figure 1. Supplementary file 3c: List of primers used for the RT-qPCR assays. [file elife-71945-supp3.xlsx]

## Sheet: Supplementary File 3a
Supplementary File 3a: Concentrations of cellular metabolites detected by HPLC/MS
Concentration expressed as pmol/ mg protein				*NQ = not quantifiable
Metabolite	Control Average	Control ST.DEV		Control Nsp14	Nsp14 ST.DEV	pvalue (t.test)
AMP	60.6985	3.85251		44.6385	10.245	0.10662
ADP	36.7302	7.06834		46.5939	4.04363	0.161872
ATP	58.0862	20.1239		157.077	29.7326	0.0175522
GMP	9.81683	0.453748		9.97986	2.44873	0.930687
GDP	4.59237	0.788694		6.9569	1.3509	0.0993437
GTP	6.02472	2.05119		21.3835	3.19687	0.00462704
CMP	3.91572	0.395637		3.75755	1.13677	0.861611
CDP	2.35298	0.23454		4.70211	0.436833	0.0025814
CTP	3.22347	0.717483		15.6166	1.88497	0.000965387
IMP	3.67065	1.56851		4.05342	0.72679	0.769824
IDP	5.25866	1.01317		6.48561	0.661045	0.224792
ITP	6.63299	2.32368		18.1066	3.6374	0.0197869
m5UMP	0	0		0	0
m5UDP	0.171437	0.060143		0.357773	0.171767	0.221192
m5UTP	0.016893	0.00738		0.0394	0.011072	0.0750066
TMP(dTMP)	0.20348	0.062522		0.147823	0.038941	0.345447
TDP(dTDP)	0.279123	0.051466		0.263773	0.021366	0.716712
TTP(dTTP)	0.59225	0.221561		1.17171	0.265256	0.076731
UMP	10.1027	2.07216		7.84989	2.31932	0.363564
UDP	8.4085	0.801722		11.3817	1.01923	0.0315981
UTP	10.2333	2.42946		34.0123	7.16888	0.01131
XMP	0.074313	0.030986		0.08403	0.007849	0.689414
XDP	0.017353	0.005785		0.047857	0.0088	0.0148987
XTP	0.015743	0.003761		0.029443	0.007876	0.0906237
dAMP	0.047153	0.005921		0.04701	0.007081	0.983532
dADP	0.181807	0.047547		0.163313	0.027389	0.658492
dATP	0.18352	0.084762		0.314727	0.058204	0.145455
dCMP	0.01391	0.004291		0.040073	0.020737	0.155512
dCDP	0.0354	0.006868		0.054787	0.005422	0.0350801
dCTP	0.05117	0.017523		0.171837	0.034096	0.0112341
dGMP	0.01087	0.015373		0	0	0.373901
dGDP	0.029437	0.005714		0.065213	0.018385	0.0583076
dGTP	0.039897	0.0059		0.130013	0.045681	0.0504912
dIMP	0.02494	0.010569		0.04188	0.015154	0.26448
dIDP	0.172693	0.073048		0.18049	0.023829	0.892833
dITP	0.023757	0.009124		0.04784	0.004922	0.0303453
dUMP	0.01276	0.006438		0.008493	0.003323	0.451786
dUDP	0.005413	0.001016		0.00489	0.001055	0.639989
dUTP	0.014303	0.003359		0.044233	0.005517	0.00280368
dXMP	32.4672	2.26008		24.7563	7.45992	0.234375
dXDP	NQ			NQ
dXTP	NQ			NQ
cAMP	0.00554	0.000694		0.009523	0.000604	0.00360055
cGMP	NQ			NQ

## Sheet: Supplementary File 3b
Supplementary File 3b: List of the plasmids for expressing SARS-CoV-2 proteins used for the screening in Figure 1.
Addgene ID	Plasmid Name	Notes
141391	pLVX-EF1alpha-SARS-CoV-2-N-2xStrep-IRES-Puro
141385	pLVX-EF1alpha-SARS-CoV-2-E-2xStrep-IRES-Puro
141386	pLVX-EF1alpha-SARS-CoV-2-M-2xStrep-IRES-Puro
141383	pLVX-EF1alpha-SARS-CoV-2-orf3a-2xStrep-IRES-Puro
141394	pLVX-EF1alpha-SARS-CoV-2-orf10-2xStrep-IRES-Puro
141379	pLVX-EF1alpha-SARS-CoV-2-nsp13-2xStrep-IRES-Puro
141395	pLVX-EF1alpha-eGFP-2xStrep-IRES-Puro
141373	pLVX-EF1alpha-SARS-CoV-2-nsp7-2xStrep-IRES-Puro
141369	pLVX-EF1alpha-SARS-CoV-2-nsp4-2xStrep-IRES-Puro
141393	pLXV-EF1alpha-2xStrep-SARS-CoV-2-orf9c-IRES-Puro
141376	pLVX-EF1alpha-SARS-CoV-2-nsp10-2xStrep-IRES-Puro
141378	pLVX-EF1alpha-SARS-CoV-2-nsp12-2xStrep-IRES-Puro
141387	pLVX-EF1alpha-SARS-CoV-2-orf6-2xStrep-IRES-Puro
141390	pLVX-EF1alpha-SARS-CoV-2-orf8-2xStrep-IRES-Puro
141368	pLVX-EF1alpha-SARS-CoV-2-nsp2-2xStrep-IRES-Puro
141381	pLVX-EF1alpha-SARS-CoV-2-nsp15-2xStrep-IRES-Puro
141377	pLVX-EF1alpha-SARS-CoV-2-nsp11-2xStrep-IRES-Puro
141370	pLVX-EF1alpha-SARS-CoV-2-nsp5-2xStrep-IRES-Puro
141374	pLVX-EF1alpha-SARS-CoV-2-nsp8-2xStrep-IRES-Puro
141389	pLXV-EF1alpha-2xStrep-SARS-CoV-2-orf7b-IRES-Puro
141367	pLVX-EF1alpha-SARS-CoV-2-nsp1-2xStrep-IRES-Puro
141384	pLXV-EF1alpha-2xStrep-SARS-CoV-2-orf3b-IRES-Puro	this plasmid actually expresses ORF3d (Jungreis et al. Virology 2021 and Nelson et al., eLife 2020)
141371	pLVX-EF1alpha-SARS-CoV-2-nsp5-C145A-2xStrep-IRES-Puro
141388	pLVX-EF1alpha-SARS-CoV-2-orf7a-2xStrep-IRES-Puro
141375	pLVX-EF1alpha-SARS-CoV-2-nsp9-2xStrep-IRES-Puro
141380	pLXV-EF1alpha-2xStrep-SARS-CoV-2-nsp14-IRES-Puro
141392	pLVX-EF1alpha-SARS-CoV-2-orf9b-2xStrep-IRES-Puro

## Sheet: Supplementary File 3c
Supplementary File 3c: List of the primers used for qPCRs
TARGET	FORWARD PRIMER (5'-3')	REVERSE PRIMER (5'-3')
GAPDH	TCACCAGGGCTGCTTTTAAC	GACAAGCTTCCCGTTCTCAG
TBP	AGTGACCCAGGGTGCCAT	TGAATAGGCTGTGGGGTCAG
SH2D2A	CCTGTCCTACGGAAGAGCTG	CCTTGCCCAATCACAGAGTT
FGF-18	GGCAAGGAGACGGAATTCTA	ACACACACTCCTTGCTGGTG
CXCL8	AGCTCTGTGTGAAGGTGCAG	TGGGGTGGAAAGGTTTGGAG
COL13A	TGCCTCTAACCTTGGATTGG	TCTGGCATTTTCAAAAAGTGAA
CDC42-circRNA	TGTTCTGCACTTACACAGGTCA	TTTTACCAACAGCACCATCG
VRK1- circRNA	GGCAAATTGGACCTCAGTGT	CTTCCAGCTTGAGCTGCTTT
MARCHF7-circRNA	ACAAATGAACCAAGCACACG	GGAGCTGGAAGGTTGAACAG
CDK1-circRNA	AAATGGAAACCAGGAAGCCTA	GGGTATGGTAGATCCGAGAGC
U6	GCTTCGGCAGCACATATACTAAAAT	CGCTTCACGAATTTGCGTGTCAT
TBP pre-mRNA	TGCTGGTTATGACAGCTCGAT	CATGTTTCCGGCGATTGCAT
18S rRNA	GCTTAATTTGACTCAACACGGGA	AGCTATCAATCTGTCAATCCTGTC
PAXIP1	GGAGGTCAAGTATTACGCGGT	TGAGGCTAGTGCATTGTAGGAA
(exon-exon)
PAXIP1	GCCCATTTTAATTTGTGTGGA	TGAGGCTAGTGCATTGTAGGAA
(exon-intron)
ZNF507	AACGAGGCTCGCGGAAGCAG	CCAACATGGCAACACTGCTA
(exon-exon)
ZNF507	CATGCCTGTAATTATCCTGTAACC	CCAACATGGCAACACTGCTA
(exon-intron)
SETD1A	ACTTCCGCTGGTGGCCTA	GAACAAACACGGATTTGCATT
(exon-exon)
SETD1A	ACTTCCGCTGGTGGCCTA	CTACCCTCACCGCTCTCTGG
(exon-intron)
